# Supplementary material for: Autophagy regulator ATG5 preserves cerebellar function by safeguarding its glycolytic activity
Source: Research Square preprint supplement (doi:10.21203/rs.3.rs-3921650/v1), 2024-02-08
Supplement: Supplementary file 1 [file 2e7204fea7cc1c006d20d294.xlsx]

## Sheet: legend
	untargeted metabolomics data set from 1-month and 3-months old cerebellum of WT and ATG5 cKO animals
	Fig. 2f	List of differentially expressed metabolites (p< 0.05; FC >< 0.5) in 1-month ATG5 cKO cerebellum
	Fig. 2g	List of differentially expressed proteins (p< 0.05; FC >< 0.5) in 3-months old ATG5 cKO cerebellum
	Fig. 2h	Pathway analysis of differentially expressed metabolites (p< 0.05; FC >< 0.55) in 3-months ATG5 cKO cerebellum
	Fig. S3 i	Pathway analysis of differentially expressed metabolites (p< 0.05; FC >< 0.25) in 1-month ATG5 cKO cerebellum
	Fig. S3 j	Pathway analysis of differentially expressed metabolites (p< 0.05; FC >< 0.25) in 3-months ATG5 cKO cerebellum

## Sheet: Fig.2 f
Fig.2 f			p-value cut off <0.05 (-log2 of 1.3)
			fold change < -0.5 and > 0.5
metabolomics data set 1-month old cerebellum
Metabolite	Log2FC	p.val	-LOG10 p-val	significant hits marked in red
1-methyladenosine	0.243528	0.128435	0.891317
1-methylnicotinamide	1.62739	0.319833	0.495077
1-oleoyl lysophosphatidic Acid	-0.13804	0.143161	0.844174
1-palmitoyl lysophosphatidic acid	0.216536	0.0249888	1.60225
2-aminoadenosine	0.237219	0.524737	0.280058
2-aminomuconic acid	-0.0634329	0.516492	0.286937
2-deoxy-2,3-dehydro-N-acetylneuraminic acid	0.0152919	0.977257	0.00999109
2-deoxyglucose-6-phosphate	0.0827473	0.654142	0.184328
2-hydroxybutyrate	-0.827778	0.11383	0.943743
2-hydroxyglutarate	-0.274866	0.103953	0.983162
2-keto-3-deoxy-gluconate	0.277868	0.223075	0.651549
2-methylcitrate	-0.104798	0.495504	0.304953
2-oxoglutarate	-0.398292	0.0308372	1.51092
2.3-phosphoglycerate	-0.610046	0.249839	0.602339
3-deoxy-D-manno-octulosonate 8-phosphate	-0.544325	0.489196	0.310517
3-hydroxy-3-methylglutarate	-0.127399	0.519385	0.284511
3-hydroxybutyrate	-1.60179	0.125768	0.90043
3-thiomorpholinecarboxylic acid	0.180326	0.251578	0.599327
4-acetamidobutyrate	0.175702	0.198803	0.701577
4-aminobutyrate	-0.14519	0.418268	0.378545
4-guanidinobutanal	-0.258263	0.22215	0.653354
4-guanidinobutyrate	0.166922	0.275655	0.559634
4-hydroxyphenyllactate	0.0674975	0.793361	0.100529
4-hydroxyproline	-0.0679543	0.49251	0.307585
4-imidazolone-5-propionate	0.204701	0.148125	0.829371
4-methyleneglutamine	0.0322941	0.859535	0.0657366
6-lactoyltetrahydropterin	0.2292	0.234295	0.630236
7-methylguanine	-0.0104459	0.93257	0.0303186
7,8-dihydrobiopterin	-0.271711	0.422948	0.373713
acetyl-CoA	0.304918	0.212868	0.671889
acetylarginine	0.288082	0.0707922	1.15001
acetylcarnitine	-0.105219	0.519266	0.28461
acetylcholine	0.0689547	0.885646	0.05274
aconitate	-0.0695439	0.640584	0.193424
adenine	0.165699	0.1242	0.905878
adenosine	0.0247405	0.8567	0.0671713
adenylosuccinate	0.213343	0.501287	0.299913
ADP	-0.0949442	0.791532	0.101532
ADP-ribose	-0.253248	0.687144	0.162953
AICAR	0.516358	0.190507	0.720089
alanine	0.0233338	0.667552	0.175515
allantoin	-0.125319	0.572769	0.242021
aminoadipate	0.360936	0.162391	0.789438
aminolauric acid	-0.555228	0.0573448	1.24151
AMP	0.140668	0.342804	0.464955
anserine	-0.434477	0.00247318	2.60674
arachidonoylcarnitine	-0.0272705	0.932933	0.0301494
arginic acid	0.321581	0.146935	0.832874
arginine	-0.297048	0.129648	0.887235
argininosuccinate	-0.673292	0.204898	0.688463
asparagine	0.186559	0.356573	0.447851
aspartate	0.16595	0.200176	0.698588
aspartylglucosamine	0.211393	0.271982	0.56546
ATP	-0.171613	0.834434	0.0786082
beta-citrylglutamate	-0.881149	0.373009	0.42828
betaine	0.516531	0.0798551	1.0977
butyrylcarnitine	-0.198135	0.201867	0.694935
c14:0	-0.469815	0.261033	0.583305
c16:0	0.477415	0.0955789	1.01964
c16:1	0.0504468	0.867107	0.0619272
c18:0	1.07598	0.0795829	1.09918
c18:1	0.37941	0.146473	0.834242
c18:2	-0.31018	0.453111	0.343795
c20:1	0.201383	0.483855	0.315285
c20:2	0.0837519	0.754998	0.122054
c20:3	0.0502239	0.883845	0.0536237
c20:4	0.63347	0.18335	0.736719
c22:4	0.334362	0.241936	0.6163
c22:5	0.567125	0.182178	0.739503
c22:6	0.254976	0.343222	0.464425
carbamoyl phosphate	0.0605019	0.588979	0.2299
carnitine	0.0771244	0.671916	0.172685
carnosine	-0.376833	0.00244214	2.61223
CDP-ethanolamine	0.073235	0.707554	0.15024
Cholesterol sulfate	-0.2981	0.639526	0.194142
choline	0.161343	0.379306	0.42101
citicoline	0.100387	0.335171	0.474733
citrate	-0.0390664	0.866824	0.0620691
citrulline	0.00455984	0.977458	0.00990211
CMP	-0.023685	0.881828	0.0546161
CMP-N-Acetylneuraminate	-0.172806	0.034079	1.46751
Coenzyme A	0.338072	0.120282	0.919798
corticosterone	0.502735	0.433653	0.362857
creatine	-0.0128994	0.749281	0.125355
creatinine	0.257783	0.0796176	1.09899
cyclic ADP-ribose	0.372658	0.332196	0.478606
cyclic AMP	-0.351764	0.425529	0.371071
cyclic GMP	-0.0880844	0.902374	0.0446134
cystathionine	-0.985704	0.0654412	1.18415
cysteinylglycine	-0.0532769	0.484292	0.314893
cytidine	0.168116	0.3104	0.508079
cytosine	0.183496	0.275486	0.559901
decanoylcarnitine	-1.64358	0.106284	0.97353
deoxyadenosine	0.150612	0.55632	0.254675
deoxycarnitine	0.744816	0.0478665	1.31997	+
deoxycytidine	0.140464	0.562897	0.249571
deoxyhexitol	2.41306	0.131343	0.881594
deoxypentitol	-1.69174	0.041231	1.38478	+
deoxyuridine	0.788255	0.00863923	2.06352	+
dephosphocoenzyme A	0.677759	0.0319002	1.49621	+
dihydroxyacetone phosphate	-0.707877	0.0934265	1.02953
dipalmitoylphosphatidylcholine	0.527082	0.127044	0.896045
dodecanoylcarnitine	-1.92679	0.0778045	1.109
dTDP-D-glucose	1.39424	0.485999	0.313364
dTTP	-0.330178	0.533028	0.27325
dyphylline	-0.0694703	0.817101	0.0877244
ergothioneine	-0.0132126	0.989422	0.00461858
erythritol	0.860517	0.00844154	2.07358	+
erythronate	0.164869	0.506627	0.295311
FAD	0.814389	0.015107	1.82082	+
fructose 6-phosphate	-0.351596	0.130893	0.883085
fumarate	-0.453864	0.135073	0.86943
gamma-glutamyl-GABA	-0.306333	0.327024	0.48542
gamma-glutamylglutamate	-0.0673705	0.887271	0.0519439
gamma-glutamylglycine	-0.391034	0.245089	0.610675
gamma-glutamylleucine	0.103431	0.705902	0.151256
gamma-glutamylvaline	-0.144409	0.679959	0.167517
GDP	0.236323	0.34692	0.459771
GDP-fucose	0.231776	0.117203	0.931063
GDP-glucose	0.290236	0.0756208	1.12136
gluconate	-0.0732322	0.466656	0.331003
gluconolactone	0.277843	0.223161	0.651383
glucose 6-phosphate	-0.0327541	0.922078	0.0352324
Glucosylglycerol-phosphate	0.00143474	0.991795	0.0035782
glucosylsphingosine	-0.486257	0.0485247	1.31404
glucuronate	-0.174144	0.430296	0.366233
glutamate	0.0302734	0.671891	0.172701
glutamine	0.060751	0.533917	0.272527
glutarylcarnitine	0.663437	0.201849	0.694974
glutathione reduced	-0.0590921	0.343857	0.463623
glyceraldehyde 3-phosphate	-0.219921	0.300138	0.522679
glycerol	0.598298	0.0967649	1.01428
glycerol 2-phosphate	0.369746	0.0483384	1.31571
glycerol 3-phosphate	0.156041	0.586358	0.231837
glycerophospho-N-palmitoyl ethanolamine	-0.0073465	0.951381	0.0216457
glycerophosphocholine	0.299523	0.0785872	1.10465
glycerophosphoglycerol	0.163595	0.147626	0.830837
glycerophosphorylethanolamine	0.369267	0.0705515	1.15149
glycine	-0.401813	0.493167	0.307006
GMP	0.147048	0.442462	0.354124
guanidinoacetate	-0.150098	0.553773	0.256668
guanidinosuccinate	-0.771552	0.408718	0.388576
guanine	0.344636	0.460614	0.336663
guanosine	0.291996	0.300977	0.521467
Hexadecanoylcarnitine	-0.304815	0.0757622	1.12055
Hexanoylcarnitine	-0.965846	0.053529	1.27141
hexitol	0.244378	0.464233	0.333264
hexosamine phosphate	0.146886	0.306881	0.51303
hexose phosphate	-0.0932572	0.754561	0.122305
histidine	-0.269157	0.007341	2.13424
homoarginine	-0.0180199	0.881202	0.0549245
Homocarnosine	-0.375481	0.0993012	1.00305
Hydroxybutyrylcarnitine	-0.749285	0.115556	0.937207
Hydroxycotinine	0.377928	0.0305007	1.51569
hypotaurine	-0.39904	0.495773	0.304717
hypoxanthine	0.324871	0.160939	0.793338
IMP	-0.105827	0.380699	0.419419
Indole-3-acrylate	-0.459385	0.0737217	1.1324
Indole-3-aldehyde	-0.483604	0.0916978	1.03764
Indole-3-lactic acid	-0.988406	0.126374	0.898342
Indole-3-propionate	-0.180828	0.139513	0.855385
indoxyl sulfate	-0.419394	0.367098	0.435218
inosine	0.335791	0.171309	0.766219
inositol	-0.0207378	0.869568	0.0606964
inositol cyclic phosphate	-0.133727	0.612277	0.213052
Isethionic acid	0.0773182	0.393596	0.404949
isoleucine	0.10411	0.383891	0.415792
isovalerylcarnitine	-0.228725	0.425809	0.370786
Kdo-4-phosphate	-0.544325	0.489196	0.310517
kynurenine	-0.817649	0.213579	0.670441
lactate	0.0895033	0.422573	0.374098
lauroylcarnitine	-1.92679	0.0778045	1.109
leucine	0.0690227	0.527229	0.278001
Linoleyl carnitine	-0.691018	0.0995538	1.00194
lysine	-0.277845	0.158895	0.798889
malate	-0.336464	0.154153	0.812049
maleamate	-0.0659707	0.509469	0.292882
malonylcarnitine	0.10976	0.571156	0.243245
methionine	-0.191479	0.199693	0.699637
methionine sulfoxide	0.32634	0.0972969	1.0119
methylhistidine	-0.817766	0.0562949	1.24953
methylimidazoleacetate	-0.0441567	0.909948	0.0409835
methylmalonylcarnitine	-0.0145176	0.953619	0.0206249
methylthioadenosine	0.265609	0.0912433	1.0398
Myristoylcarnitine	-1.0876	0.0395843	1.40248	+
N-acetylaminoadipate	0.344531	0.368469	0.433599
N-acetylasparagine	0.251507	0.129291	0.888432
N-acetylaspartate	-0.0739373	0.458256	0.338891
N-acetylaspartylglutamate	-0.491697	0.0942938	1.02552
N-acetylglutamate	-0.28498	0.361361	0.442058
N-acetylglutamine	0.165595	0.331107	0.480032
N-acetylhexosamine	0.302284	0.311379	0.506711
N-acetylhexosamine phosphate	0.122319	0.589166	0.229763
N-acetylhistidine	0.182983	0.122022	0.913562
N-acetyllactosamine	0.0447727	0.773088	0.111771
N-acetylmethionine	-0.00254299	0.991848	0.00355489
N-acetylneuraminate	-0.363704	0.624732	0.204306
N-acetylserine	-0.100962	0.593611	0.226498
N-acetyltaurine	0.268786	0.118244	0.927221
N-alpha-acetyllysine	0.160405	0.230439	0.637443
N-arachidonoyl taurine	0.515485	0.223479	0.650763
N-carbamoylaspartate	-0.446415	0.0131182	1.88213
N-carboxyethyl-gamma-aminobutyric acid	-0.0135385	0.939963	0.0268892
N-formylmethionine	0.135567	0.419354	0.37742
N-oleoyl phenylalanine	0.998751	0.0089038	2.05042	+
N(2)-succinylglutamate	-0.993927	0.0679892	1.16756
N(6)-Methyllysine	-0.235055	0.307782	0.511757
N(6)-OH-Me-Adenosine	0.00705808	0.965547	0.0152268
N,N-dimethylarginine	-0.21492	0.0673016	1.17197
N2-acetylornithine	0.498004	0.119465	0.922759
N2-gamma-glutamylglutamine	0.0718463	0.809187	0.091951
N2-Succinyl-L-glutamic acid 5-semialdehyde	-0.796009	0.118473	0.92638
N6-acetyllysine	0.102006	0.673266	0.171814
N6,N6,N6-trimethyllysine	0.0703381	0.769481	0.113802
NAD	0.349365	0.331748	0.479192
NADH	1.16795	0.0964638	1.01564
NADP	0.292107	0.518426	0.285313
NADPH	1.01277	0.219875	0.657824
nicotinamide	-0.24988	0.612531	0.212872
nicotinamide mononucleotide	0.25145	0.290628	0.536662
nicotinamide riboside	0.0759793	0.521525	0.282725
O-succinyl-homoserine	0.250646	0.241268	0.6175
Oleoylcarnitine	-0.328506	0.0876963	1.05702
ornithine	-0.690668	0.116435	0.933915
orotate	0.0671363	0.513373	0.289567
orotidine	0.124529	0.477018	0.321465
oxidized glutathione	0.392739	0.189286	0.722882
palmitoleoylcarnitine	-0.697833	0.0243001	1.61439	+
palmitoyl sphingomyelin	0.383903	0.0665567	1.17681
palmitoylcarnitine	-0.304865	0.0758137	1.12025
pantothenate	-0.147893	0.141123	0.850403
pentitol	0.513324	0.0683715	1.16512
phenylalanine	-0.19066	0.0576329	1.23933
phosphocreatine	-0.512517	0.515535	0.287742
phosphoenolpyruvate	0.0526829	0.914831	0.0386589
phosphoethanolamine	0.207887	0.557859	0.253476
Phosphoramidic acid	0.0643112	0.429549	0.366987
phosphorylcholine	0.0973414	0.387137	0.412136
pipecolate	0.258613	0.18514	0.7325
proline	0.0329446	0.675213	0.170559
propanoate	0.16403	0.338769	0.470097
propionylcarnitine	0.105905	0.596448	0.224427
Prostaglandin D2	1.43163	0.304436	0.516504
pseudouridine	0.020261	0.874761	0.0581105
pyridoxamine 5-phosphate	0.13288	0.250164	0.601776
pyroglutamate	0.0872529	0.559307	0.252349
pyruvate	-0.537406	0.118534	0.926158
retinol	0.404308	0.0907879	1.04197
ribose 5-phosphate	-0.13803	0.626911	0.202794
ribulose 5-phosphate	0.092786	0.678602	0.168385
S-(2-succinyl)cysteine	-0.048183	0.674595	0.170957
S-(Formylmethyl)glutathione	0.151999	0.299427	0.523708
S-(Hydroxyphenylacetothiohydroximoyl)-L-cysteine	0.472904	0.00612803	2.21268
S-adenosylhomocysteine	0.14926	0.418955	0.377832
S-adenosylmethionine	-0.323315	0.226867	0.644229
S-allylcysteine	0.179097	0.245988	0.609086
S-lactoylglutathione	0.0714426	0.920455	0.0359974
S-methylglutathione	0.120471	0.496777	0.303838
S-succinylglutathione	0.146448	0.473286	0.324876
saccharopine	-0.142763	0.519973	0.284019
sedoheptulose 7-phosphate	0.0399673	0.890361	0.0504339
serine	-0.35277	0.220161	0.657259
serotonin	-1.06712	0.29204	0.534558
sphingomyelin	0.40729	0.0783031	1.10622
sphingosine-1-phosphate	0.0471044	0.660647	0.18003
stearoylcarnitine	0.198173	0.379983	0.420235
streptidine	0.0857535	0.729377	0.137048
succinate	0.165488	0.316787	0.499233
succinic semialdehyde	0.077386	0.678279	0.168592
succinyl proline	-0.288197	0.364341	0.438492
succinyladenosine	-0.129865	0.809985	0.0915231
succinylcarnitine	-0.0466276	0.830697	0.0805574
Sulfoacetic acid	0.0822564	0.644961	0.190467
Sulfuric acid	-0.0760059	0.593234	0.226774
targinine	0.0368756	0.832316	0.079712
taurine	0.019176	0.845089	0.0730977
tetradecenoylcarnitine	-0.973219	0.0470723	1.32723	+
tetraglyceride	-0.035993	0.888708	0.051241
tetrahydrothiophene-2-carboxylic acid	-0.0876214	0.541632	0.266296
thiamine	0.0609911	0.777353	0.109382
thiamine pyrophosphate	0.233053	0.190532	0.720032
thioproline	-0.285601	0.216717	0.664106
threonine	-0.33536	0.0292842	1.53337
thymidine	0.966306	0.0133354	1.87499	+
trigonelline	0.577119	0.235277	0.628421
trimethylamine N-oxide	0.770946	0.249516	0.602902
tryptophan	-0.459552	0.0734754	1.13386
tyrosine	-0.212627	0.27954	0.553556
UDP	0.075446	0.652566	0.185376
UDP-GlcNAc	0.0914413	0.582639	0.2346
UDP-glucose	0.0921636	0.51443	0.288674
UDP-glucuronate	0.405514	0.156431	0.805677
UMP	-0.0226881	0.907686	0.0420642
uracil	0.437302	0.150913	0.821273
urate	-0.336938	0.083833	1.07659
Urate D-ribonucleotide	-0.189389	0.6772	0.169283
uridine	0.215478	0.198594	0.702035
urocanate	-0.456683	0.603708	0.219173
valine	-0.00392702	0.975404	0.0108156
xanthine	-0.00119572	0.99748	0.00109596
xanthosine	-0.483598	0.279123	0.554204
xanthosine monophosphate	0.17027	0.645021	0.190426

## Sheet: Fig.2 g,h
Fig.2 g&h				p-value cut off <0.05 (-log2 of 1.3)
				fold change < -0.5 and > 0.5
metabolomics data set 3-months old cerebellum
g										h
	Metabolite	log2FC	p.val	-LOG10 p-val	significant hits marked in red						upregulated metabolites		downregulated metabolitees
	1-methyladenosine	-0.211981	0.00288667	2.5396							1-oleoyl lysophosphatidic Acid		2-aminoadenosine
	1-methylnicotinamide	-0.323636	0.0971128	1.01272							2-oxoglutarate		3-thiomorpholinecarboxylic acid
	1-oleoyl lysophosphatidic Acid	0.526581	7.7598e-06	5.11015	+						2.3-phosphoglycerate		acetyl-CoA
	1-palmitoyl lysophosphatidic acid	0.286502	0.0142017	1.84766							3-deoxy-D-manno-octulosonate 8-phosphate		AICAR
	2.3-phosphoglycerate	1.4195	0.0010681	2.97139	+						ADP		betaine
	2-aminomuconic acid	-0.00550353	0.922807	0.0348893							anserine		c16:1
	2-deoxy-2,3-dehydro-N-acetylneuraminic acid	-0.127024	0.354998	0.449774							argininosuccinate		c18:0
	2-deoxyglucose-6-phosphate	-0.15358	0.565937	0.247232							cyclic AMP		c18:1
	2-hydroxybutyrate	-0.190029	0.381369	0.418654							cyclic GMP		c18:2
	2-hydroxyglutarate	-0.0348399	0.591985	0.227689							decanoylcarnitine		c20:1
	2-keto-3-deoxy-gluconate	0.322039	0.127973	0.892883							dihydroxyacetone phosphate		c20:2
	2-methylcitrate	-0.270223	0.191156	0.718612							fructose 6-phosphate		c20:3
	2-aminoadenosine	-0.630016	0.027603	1.55904	+						glucose 6-phosphate		c20:4
	2-oxoglutarate	0.881466	0.00707311	2.15039	+						glyceraldehyde 3-phosphate		c22:4
	3-deoxy-D-manno-octulosonate 8-phosphate	2.16753	0.000661081	3.17975	+						hexose phosphate		c22:5
	3-hydroxy-3-methylglutarate	-0.259646	0.106368	0.97319							hypotaurine		c22:6
	3-hydroxybutyrate	-0.326579	0.314672	0.502142							Kdo-4-phosphate		Cholesterol sulfate
	3-thiomorpholinecarboxylic acid	-0.822845	0.00723802	2.14038	+						Linoleyl carnitine		choline
	4-acetamidobutyrate	-0.113316	0.399373	0.398621							palmitoleoylcarnitine		cytidine
	4-aminobutyrate	-0.170888	0.0392637	1.40601							phosphoenolpyruvate		cytosine
	4-guanidinobutanal	0.215853	0.0127546	1.89433							pyruvate		deoxycarnitine
	4-guanidinobutyrate	-0.1759	0.188695	0.72424							S-lactoylglutathione		deoxypentitol
	4-hydroxyphenyllactate	-0.536006	0.204868	0.688526							sedoheptulose 7-phosphate		dephosphocoenzyme A
	4-hydroxyproline	-0.0209524	0.727236	0.138325							serotonin		FAD
	4-imidazolone-5-propionate	-0.308349	0.0370147	1.43163							tetradecenoylcarnitine		gamma-glutamylglutamate
	4-methyleneglutamine	0.0284548	0.791478	0.101561							Urate D-ribonucleotide		glycerol
	6-lactoyltetrahydropterin	-0.374209	0.00593268	2.22675									Hydroxycotinine
	7-methylguanine	0.18086	0.125077	0.902821									IMP
	7,8-dihydrobiopterin	0.266306	0.073904	1.13133									N-acetylasparagine
	acetyl-CoA	-0.69915	0.00373909	2.42723	+								N-acetyltaurine
	acetylarginine	-0.0749634	0.690406	0.160896									N-arachidonoyl taurine
	acetylcarnitine	-0.102733	0.444856	0.35178									N2-gamma-glutamylglutamine
	acetylcholine	0.503598	0.128919	0.889682									orotate
	aconitate	0.297889	0.0245649	1.60969									Prostaglandin D2
	adenine	-0.418111	0.000271621	3.56604									retinol
	adenosine	-0.445401	7.88837e-05	4.10301									S-(Hydroxyphenylacetothiohydroximoyl)-L-cysteine
	adenylosuccinate	-0.565031	0.0595845	1.22487									S-allylcysteine
	ADP	1.10402	0.000992166	3.00342	+								sphingomyelin
	ADP-ribose	-0.0247187	0.930343	0.031357									thymidine
	AICAR	-0.9244	0.0265119	1.57656	+								uridine
	alanine	0.0178133	0.778128	0.108949									xanthine
	allantoin	-0.00167492	0.995803	0.00182678
	aminoadipate	-0.138686	0.611749	0.213427
	aminolauric acid	0.0604997	0.686986	0.163052
	AMP	-0.189507	0.0214826	1.66791
	anserine	0.621289	0.00280049	2.55277	+
	arachidonoylcarnitine	-0.109518	0.588224	0.230457
	arginic acid	-0.137296	0.24654	0.608113
	arginine	0.194555	0.02254	1.64705
	argininosuccinate	0.533529	0.00716331	2.14489	+
	asparagine	-0.298331	0.05935	1.22658
	aspartate	0.0337253	0.723062	0.140824
	aspartylglucosamine	-0.102301	0.472408	0.325683
	ATP	0.984077	0.139246	0.856218
	beta-citrylglutamate	0.222968	0.349735	0.45626
	betaine	-0.88438	2.03009e-06	5.69248	+
	butyrylcarnitine	0.307128	0.183611	0.736102
	c14:0	-0.153872	0.236246	0.626635
	c16:0	-0.407607	0.0529227	1.27636
	c16:1	-0.741649	0.00113788	2.9439	+
	c18:0	-1.24747	0.000158918	3.79883	+
	c18:1	-1.37066	7.41824e-08	7.1297	+
	c18:2	-0.939729	0.000349927	3.45602	+
	c20:1	-1.15434	2.65627e-09	8.57573	+
	c20:2	-1.40245	7.92403e-07	6.10105	+
	c20:3	-1.23538	2.96119e-06	5.52853	+
	c20:4	-1.52935	1.54359e-07	6.81147	+
	c22:4	-1.21296	3.51748e-06	5.45377	+
	c22:5	-0.732217	0.00465383	2.33219	+
	c22:6	-1.28876	1.87927e-05	4.72601	+
	carbamoyl phosphate	-0.0455939	0.682051	0.166183
	carnitine	-0.180381	0.232473	0.633627
	carnosine	0.451704	0.000824485	3.08382
	CDP-ethanolamine	-0.0800657	0.379764	0.420487
	Cholesterol sulfate	-0.947991	7.04392e-05	4.15219	+
	choline	-0.652211	0.000220919	3.65577	+
	citicoline	-0.234929	0.00454935	2.34205
	citrate	0.0679394	0.727875	0.137943
	citrulline	0.0169146	0.860541	0.0652284
	CMP	0.0502946	0.672306	0.172433
	CMP-N-Acetylneuraminate	0.0259533	0.794004	0.100177
	Coenzyme A	-0.415771	0.0254701	1.59397
	corticosterone	-0.334	0.345318	0.46178
	creatine	0.0455209	0.555851	0.255042
	creatinine	0.00438678	0.949412	0.0225454
	cyclic ADP-ribose	0.285421	0.236175	0.626766
	cyclic AMP	2.91624	0.00422569	2.3741	+
	cyclic GMP	1.59311	0.00233252	2.63218	+
	cystathionine	0.56744	0.0827032	1.08248
	cysteinylglycine	0.120291	0.499128	0.301788
	cytidine	-0.868738	2.59274e-08	7.58624	+
	cytosine	-0.842338	1.64615e-07	6.78353	+
	decanoylcarnitine	1.00171	0.0096682	2.01465	+
	deoxyadenosine	-0.336985	0.107085	0.97027
	deoxycarnitine	-0.627918	1.34156e-05	4.87239	+
	deoxycytidine	-0.592617	0.0568877	1.24498
	deoxyhexitol	-1.88766	0.116939	0.93204
	deoxypentitol	-1.85541	0.00155839	2.80732	+
	deoxyuridine	-0.169329	0.334071	0.476161
	dephosphocoenzyme A	-1.29872	2.52233e-05	4.5982	+
	dihydroxyacetone phosphate	1.52864	1.51124e-05	4.82067	+
	dipalmitoylphosphatidylcholine	-0.360207	0.106029	0.974574
	dodecanoylcarnitine	0.441963	0.0532358	1.2738
	dTDP-D-glucose	1.93399	0.253091	0.596723
	dTTP	-0.0780374	0.884483	0.0533104
	dyphylline	0.441373	0.0388984	1.41007
	ergothioneine	0.666409	0.154126	0.812124
	erythritol	-0.306006	0.28904	0.539041
	erythronate	-0.578191	0.234116	0.630569
	FAD	-0.751171	0.00307202	2.51258	+
	fructose 6-phosphate	2.08691	0.000280926	3.55141	+
	fumarate	0.487364	0.000171296	3.76625
	gamma-glutamyl-GABA	0.187616	0.436882	0.359636
	gamma-glutamylglutamate	-1.55551	0.000537385	3.26971	+
	gamma-glutamylglycine	-0.00277536	0.98075	0.00844171
	gamma-glutamylleucine	-0.107657	0.367009	0.435323
	gamma-glutamylvaline	-0.117912	0.677804	0.168896
	GDP	0.185937	0.416604	0.380276
	GDP-fucose	-0.0684126	0.49525	0.305176
	GDP-glucose	0.00761602	0.945979	0.0241187
	gluconate	0.256777	0.0037012	2.43166
	gluconolactone	0.322038	0.127998	0.892798
	glucose 6-phosphate	0.889089	0.00557843	2.25349	+
	Glucosylglycerol-phosphate	-0.00473235	0.971285	0.0126534
	glucosylsphingosine	0.422365	0.103151	0.986529
	glucuronate	-0.0100093	0.949873	0.0223346
	glutamate	0.0643921	0.420147	0.376599
	glutamine	-0.102475	0.718402	0.143632
	glutarylcarnitine	-0.841879	0.0577509	1.23844
	glutathione reduced	0.0744854	0.679306	0.167935
	glyceraldehyde 3-phosphate	0.825283	0.000186784	3.72866	+
	glycerol	-1.0325	0.00941891	2.026	+
	glycerol 2-phosphate	-0.00601918	0.958948	0.0182048
	glycerol 3-phosphate	0.00279199	0.985432	0.00637324
	glycerophospho-N-palmitoyl ethanolamine	0.328998	0.0331831	1.47908
	glycerophosphocholine	0.013419	0.913021	0.0395194
	glycerophosphoglycerol	0.000786299	0.991868	0.00354625
	glycerophosphorylethanolamine	0.1277	0.20536	0.687483
	glycine	0.322091	0.244106	0.612421
	GMP	-0.465175	0.00017882	3.74758
	guanidinoacetate	0.405979	0.00654958	2.18379
	guanidinosuccinate	0.430309	0.258868	0.586921
	guanine	-0.477888	0.0915677	1.03826
	guanosine	-0.452932	0.072255	1.14113
	Hexadecanoylcarnitine	0.290067	0.0839124	1.07617
	Hexanoylcarnitine	0.856376	0.129565	0.887513
	hexitol	0.00749342	0.960105	0.0176813
	hexosamine phosphate	0.269165	0.155956	0.806997
	hexose phosphate	1.14754	0.00122545	2.9117	+
	histidine	0.250382	0.0224976	1.64786
	homoarginine	-0.184392	0.391183	0.40762
	Homocarnosine	0.461224	0.0102905	1.98756
	Hydroxybutyrylcarnitine	-0.0768772	0.779509	0.108179
	Hydroxycotinine	-0.815727	0.000856616	3.06721	+
	hypotaurine	2.45404	0.00894607	2.04837	+
	hypoxanthine	-0.363511	0.0184672	1.7336
	IMP	-0.705741	0.0254303	1.59465	+
	Indole-3-acrylate	0.1821	0.523507	0.281078
	Indole-3-aldehyde	0.203153	0.514546	0.288576
	Indole-3-lactic acid	-0.0173532	0.957541	0.0188428
	Indole-3-propionate	-0.0650046	0.748713	0.125685
	indoxyl sulfate	-0.0450536	0.937313	0.0281153
	inosine	-0.393963	0.0271304	1.56654
	inositol	0.396567	0.049606	1.30447
	inositol cyclic phosphate	-0.132977	0.569177	0.244753
	Isethionic acid	0.0575799	0.595733	0.224948
	isoleucine	0.0909752	0.421708	0.374989
	isovalerylcarnitine	-0.0696479	0.537687	0.269471
	Kdo-4-phosphate	2.16367	0.000629396	3.20108	+
	kynurenine	-0.641033	0.572122	0.242511
	lactate	0.266844	0.118911	0.924778
	lauroylcarnitine	0.441963	0.0532358	1.2738
	leucine	0.0877104	0.2172	0.66314
	Linoleyl carnitine	0.736161	0.0161188	1.79267	+
	lysine	0.217417	0.0526173	1.27887
	malate	0.409694	0.000703862	3.15251
	maleamate	-0.0120454	0.838936	0.0762714
	malonylcarnitine	-0.326192	0.115087	0.938972
	methionine	0.0132533	0.944432	0.0248293
	methionine sulfoxide	-0.0971215	0.861706	0.0646409
	methylhistidine	0.64513	0.145872	0.836027
	methylimidazoleacetate	0.0117324	0.945898	0.0241558
	methylmalonylcarnitine	-0.163984	0.29224	0.53426
	methylthioadenosine	-0.0857158	0.616839	0.209828
	Myristoylcarnitine	0.371366	0.0278173	1.55569
	N-acetylaminoadipate	-0.313106	0.172476	0.763272
	N(6)-Methyllysine	0.365822	0.00216497	2.66455
	N-acetylaspartate	-0.0262324	0.637819	0.195303
	N-acetylaspartylglutamate	0.0744089	0.348568	0.457712
	N-acetylglutamate	0.0881574	0.195066	0.709817
	N-acetylglutamine	-1.01483	0.27636	0.558524
	N-acetylhexosamine	-0.187343	0.223144	0.651414
	N-acetylhexosamine phosphate	0.0700754	0.514744	0.288409
	N-acetylhistidine	-0.917665	0.170207	0.769023
	N2-gamma-glutamylglutamine	-1.19622	0.000651284	3.18623	+
	N-acetylmethionine	-0.424523	0.101415	0.993897
	N-acetylneuraminate	0.018876	0.853466	0.0688138
	N-acetylasparagine	-0.973547	0.0375449	1.42545	+
	N-acetyllactosamine	0.468993	0.00018444	3.73415
	N-acetylserine	-0.342982	0.00472996	2.32514
	N-acetyltaurine	-0.604769	0.009747	2.01113	+
	N-carbamoylaspartate	-0.0609645	0.907857	0.0419827
	N-alpha-acetyllysine	-0.339055	0.00550813	2.259
	N-arachidonoyl taurine	-1.18375	0.00482676	2.31634	+
	N-oleoyl phenylalanine	-0.204709	0.278952	0.554471
	N(2)-succinylglutamate	0.320169	0.172353	0.763581
	N-carboxyethyl-gamma-aminobutyric acid	-0.181431	0.0150256	1.82317
	N(6)-OH-Me-Adenosine	-0.0553025	0.654684	0.183968
	N,N-dimethylarginine	0.153824	0.284543	0.545852
	N2-acetylornithine	0.153378	0.518559	0.285202
	N-formylmethionine	-0.49957	0.017113	1.76667
	N2-Succinyl-L-glutamic acid 5-semialdehyde	0.141405	0.610937	0.214003
	N6-acetyllysine	0.259267	0.126547	0.897748
	N6,N6,N6-trimethyllysine	-0.143714	0.113736	0.944101
	NAD	0.283812	0.219046	0.659464
	NADH	-1.15446	0.057215	1.24249
	NADP	0.111267	0.599588	0.222147
	NADPH	-0.102224	0.914457	0.0388365
	nicotinamide	-0.0642343	0.771151	0.112861
	nicotinamide mononucleotide	0.0848154	0.603803	0.219105
	nicotinamide riboside	-0.11512	0.0912347	1.03984
	O-succinyl-homoserine	0.0841653	0.718065	0.143836
	Oleoylcarnitine	0.244875	0.250289	0.601558
	ornithine	0.253535	0.181764	0.740493
	orotate	-0.666684	0.0078466	2.10532	+
	orotidine	-0.398248	0.000744715	3.12801
	oxidized glutathione	-0.19105	0.333634	0.47673
	palmitoleoylcarnitine	0.722905	0.0035515	2.44959	+
	palmitoyl sphingomyelin	0.305852	0.0939018	1.02733
	palmitoylcarnitine	0.29063	0.0832593	1.07957
	pantothenate	-0.0712726	0.493061	0.307099
	pentitol	-0.378379	0.00925026	2.03385
	phenylalanine	-0.0554111	0.796705	0.0987024
	phosphocreatine	1.35891	0.0602874	1.21977
	phosphoenolpyruvate	1.13024	0.00647467	2.18878	+
	phosphoethanolamine	0.183881	0.207809	0.682336
	Phosphoramidic acid	-0.0136376	0.879949	0.0555423
	phosphorylcholine	-0.166997	0.0690836	1.16063
	pipecolate	0.417609	0.0627921	1.2021
	proline	0.0158788	0.83562	0.0779911
	propanoate	-0.34302	0.0448902	1.34785
	propionylcarnitine	-0.433453	0.00285613	2.54422
	Prostaglandin D2	-1.27431	0.00207233	2.68354	+
	pseudouridine	-0.0740558	0.274688	0.56116
	pyridoxamine 5-phosphate	-0.0964812	0.180615	0.743247
	pyroglutamate	-0.415573	0.0771334	1.11276
	pyruvate	2.94008	0.0300691	1.52188	+
	retinol	-0.869255	0.000611599	3.21353	+
	ribose 5-phosphate	0.0410198	0.738272	0.131783
	ribulose 5-phosphate	-0.415716	0.00513776	2.28923
	S-(2-succinyl)cysteine	0.125758	0.400941	0.39692
	S-(Formylmethyl)glutathione	-0.385081	0.0284476	1.54595
	S-(Hydroxyphenylacetothiohydroximoyl)-L-cysteine	-0.886758	0.000127542	3.89435	+
	S-adenosylhomocysteine	-0.44621	0.00302375	2.51945
	S-adenosylmethionine	0.201131	0.0736566	1.13279
	S-allylcysteine	-0.824143	0.00363936	2.43897	+
	sedoheptulose 7-phosphate	1.14079	0.00919176	2.0366	+
	S-methylglutathione	-0.161282	0.306458	0.513629
	S-succinylglutathione	0.0466484	0.698678	0.155723
	saccharopine	-0.0105468	0.963481	0.0161571
	serotonin	0.834309	0.0205065	1.68811	+
	serine	0.0346053	0.649786	0.18723
	S-lactoylglutathione	0.93211	0.0436679	1.35984	+
	sphingomyelin	-0.785887	0.0486877	1.31258	+
	sphingosine-1-phosphate	0.485132	0.00533806	2.27262
	stearoylcarnitine	-0.352987	0.0370067	1.43172
	streptidine	0.124901	0.445281	0.351366
	succinate	-0.326142	0.0711914	1.14757
	succinic semialdehyde	-0.168629	0.272243	0.565044
	succinyl proline	0.226748	0.389995	0.408941
	succinyladenosine	-0.597991	0.267921	0.571993
	succinylcarnitine	-0.089906	0.677412	0.169147
	Sulfoacetic acid	0.0643147	0.79538	0.0994252
	Sulfuric acid	-0.0566435	0.451086	0.345741
	targinine	0.0465323	0.742385	0.129371
	taurine	-0.0429736	0.687337	0.16283
	tetradecenoylcarnitine	0.673255	0.00360194	2.44346	+
	tetraglyceride	0.0760369	0.690125	0.161072
	tetrahydrothiophene-2-carboxylic acid	0.164608	0.237703	0.623966
	thiamine	-0.198408	0.242653	0.615014
	thiamine pyrophosphate	-0.390169	0.000131464	3.88119
	thioproline	-0.0861119	0.557132	0.254042
	threonine	-0.0330381	0.691313	0.160325
	thymidine	-0.618421	0.0367017	1.43531	+
	trigonelline	0.157152	0.516956	0.286546
	trimethylamine N-oxide	-1.07024	0.0609483	1.21504
	tryptophan	0.15518	0.59331	0.226718
	tyrosine	-0.202547	0.466683	0.330978
	UDP	0.309594	0.0521844	1.28246
	UDP-GlcNAc	0.0858468	0.367791	0.434399
	UDP-glucose	0.184202	0.175982	0.754533
	UDP-glucuronate	-0.202343	0.120832	0.917818
	UMP	-0.0299843	0.854752	0.0681599
	uracil	-0.224983	0.134626	0.870871
	urate	0.232832	0.255849	0.592017
	Urate D-ribonucleotide	1.46026	0.000260352	3.58444	+
	uridine	-0.543728	0.00108516	2.96451	+
	urocanate	-0.386634	0.614678	0.211353
	valine	0.166855	0.0461198	1.33611
	xanthine	-0.514488	0.0178438	1.74851	+
	xanthosine	0.401722	0.445376	0.351273
	xanthosine monophosphate	0.151965	0.334219	0.475968

## Sheet: Fig. S3 i
Fig.S3 i				p-value cut off <0.05 (-log2 of 1.3)
				fold change < -0.25 and > 0.25
metabolomics data set 1-month old cerebellum
UP			DOWN
2-oxoglutarate			deoxycarnitine
anserine			deoxyuridine
carnosine			dephosphocoenzyme A
deoxypentitol			erythritol
glucosylsphingosine			FAD
histidine			glycerol 2-phosphate
Myristoylcarnitine			Hydroxycotinine
N-carbamoylaspartate			N-oleoyl phenylalanine
palmitoleoylcarnitine			S-(Hydroxyphenylacetothiohydroximoyl)-L-cysteine
tetradecenoylcarnitine			thymidine
threonine

## Sheet: Fig. S3 j
Fig.S3 i				p-value cut off <0.05 (-log2 of 1.3)
				fold change < -0.25 and > 0.25
metabolomics data set 3-months old cerebellum
	UP					DOWN
	1-oleoyl lysophosphatidic Acid					2-aminoadenosine
	1-palmitoyl lysophosphatidic acid					3-thiomorpholinecarboxylic acid
	2-oxoglutarate					4-imidazolone-5-propionate
	2.3-phosphoglycerate					6-lactoyltetrahydropterin
	3-deoxy-D-manno-octulosonate 8-phosphate					acetyl-CoA
	aconitate					adenine
	ADP					adenosine
	anserine					AICAR
	argininosuccinate					betaine
	carnosine					c16:1
	cyclic AMP					c18:0
	cyclic GMP					c18:1
	decanoylcarnitine					c18:2
	dihydroxyacetone phosphate					c20:1
	dyphylline					c20:2
	fructose 6-phosphate					c20:3
	fumarate					c20:4
	gluconate					c22:4
	glucose 6-phosphate					c22:5
	glyceraldehyde 3-phosphate					c22:6
	glycerophospho-N-palmitoyl ethanolamine					Cholesterol sulfate
	guanidinoacetate					choline
	hexose phosphate					Coenzyme A
	histidine					cytidine
	Homocarnosine					cytosine
	hypotaurine					deoxycarnitine
	inositol					deoxypentitol
	Kdo-4-phosphate					dephosphocoenzyme A
	Linoleyl carnitine					FAD
	malate					gamma-glutamylglutamate
	Myristoylcarnitine					glycerol
	N-acetyllactosamine					GMP
	N(6)-Methyllysine					Hydroxycotinine
	palmitoleoylcarnitine					hypoxanthine
	phosphoenolpyruvate					IMP
	pyruvate					inosine
	S-lactoylglutathione					N-acetylasparagine
	sedoheptulose 7-phosphate					N-acetylserine
	serotonin					N-acetyltaurine
	sphingosine-1-phosphate					N-alpha-acetyllysine
	tetradecenoylcarnitine					N-arachidonoyl taurine
	Urate D-ribonucleotide					N-formylmethionine
						N2-gamma-glutamylglutamine
						orotate
						orotidine
						pentitol
						propanoate
						propionylcarnitine
						Prostaglandin D2
						retinol
						ribulose 5-phosphate
						S-(Formylmethyl)glutathione
						S-(Hydroxyphenylacetothiohydroximoyl)-L-cysteine
						S-adenosylhomocysteine
						S-allylcysteine
						sphingomyelin
						stearoylcarnitine
						thiamine pyrophosphate
						thymidine
						uridine
						xanthine
