# Supplementary material for: Autophagy regulator ATG5 preserves cerebellar function by safeguarding its glycolytic activity
Source: Research Square preprint supplement (doi:10.21203/rs.3.rs-3921650/v1), 2024-02-08
Supplement: Supplementary file 2 [file 7554a5adf83f24357868e9fb.xlsx]

## Sheet: legend
	Targeted metabolomics anaylsis of glycolysis and TCA cycle intermediates in 1 and 3-months old cerebellum
	data set from one-month old cerebellum					corresponds to Fig.3 a and Fig.S4 a
	data set from 3-months old cerebellum					corresponds to Fig.3 b and Fig.S4 b

## Sheet: 1 month
targeted metabolomics analysis of 1-month old cerebellum
	Analyte	Abbreviation	TList	Rawfile	RT	Normarea	Totalarea	Genotype	Tissue	Sex	Treatment	Animal	Sampletype
11	(2+3)-Phosphoglycerate	2PG+3PG	IC-MS	S11_sample_a_mouse_cerebellum_female_WT_BEQ994_28_BB8	13.5	1.05124	168831307	WT	cerebellum	female			Unknown
12	(2+3)-Phosphoglycerate	2PG+3PG	IC-MS	S12_sample_a_mouse_cerebellum_male_WT_BEQ998_29_BC1	13.5	1.06091	258154915	WT	cerebellum	male			Unknown
13	(2+3)-Phosphoglycerate	2PG+3PG	IC-MS	S13_sample_a_mouse_cerebellum_male_WT_BEQ999_30_BC2	13.51	1.18558	253155812	WT	cerebellum	male			Unknown
14	(2+3)-Phosphoglycerate	2PG+3PG	IC-MS	S14_sample_a_mouse_cerebellum_female_WT_BEQ1004_31_BC3	13.49	1.23684	318908607	WT	cerebellum	female			Unknown
15	(2+3)-Phosphoglycerate	2PG+3PG	IC-MS	S15_sample_a_mouse_cerebellum_female_WT_BEQ1006_32_BC4	13.49	1.13891	311320403	WT	cerebellum	female			Unknown
16	(2+3)-Phosphoglycerate	2PG+3PG	IC-MS	S16_sample_a_mouse_cerebellum_female_KO_BEQ996_34_BC5	13.5	0.88063	196477238	KO	cerebellum	female			Unknown
17	(2+3)-Phosphoglycerate	2PG+3PG	IC-MS	S17_sample_a_mouse_cerebellum_male_KO_BEQ1034_35_BC6	13.49	1.04567	150995356	KO	cerebellum	male			Unknown
18	(2+3)-Phosphoglycerate	2PG+3PG	IC-MS	S18_sample_a_mouse_cerebellum_female_KO_BEQ1041_36_BC7	13.5	1.0649	244673814	KO	cerebellum	female			Unknown
19	(2+3)-Phosphoglycerate	2PG+3PG	IC-MS	S19_sample_a_mouse_cerebellum_male_KO_BEQ1047_37_BC8	13.5	0.82124	194268151	KO	cerebellum	male			Unknown
20	(2+3)-Phosphoglycerate	2PG+3PG	IC-MS	S20_sample_a_mouse_cerebellum_female_KO_BEQ1075_38_BD1	13.5	0.93099	186124733	KO	cerebellum	female			Unknown
35	6-Phosphogluconate	6PG	IC-MS	S11_sample_a_mouse_cerebellum_female_WT_BEQ994_28_BB8	12.65	0.09266	14882162	WT	cerebellum	female			Unknown
36	6-Phosphogluconate	6PG	IC-MS	S12_sample_a_mouse_cerebellum_male_WT_BEQ998_29_BC1	12.64	0.04177	10164843	WT	cerebellum	male			Unknown
37	6-Phosphogluconate	6PG	IC-MS	S13_sample_a_mouse_cerebellum_male_WT_BEQ999_30_BC2	12.64	0.07248	15477197	WT	cerebellum	male			Unknown
38	6-Phosphogluconate	6PG	IC-MS	S14_sample_a_mouse_cerebellum_female_WT_BEQ1004_31_BC3	12.65	0.4909	126575306	WT	cerebellum	female			Unknown
39	6-Phosphogluconate	6PG	IC-MS	S15_sample_a_mouse_cerebellum_female_WT_BEQ1006_32_BC4	12.65	0.23706	64800087	WT	cerebellum	female			Unknown
40	6-Phosphogluconate	6PG	IC-MS	S16_sample_a_mouse_cerebellum_female_KO_BEQ996_34_BC5	12.63	0.10335	23058167	KO	cerebellum	female			Unknown
41	6-Phosphogluconate	6PG	IC-MS	S17_sample_a_mouse_cerebellum_male_KO_BEQ1034_35_BC6	12.65	0.22443	32407531	KO	cerebellum	male			Unknown
42	6-Phosphogluconate	6PG	IC-MS	S18_sample_a_mouse_cerebellum_female_KO_BEQ1041_36_BC7	12.66	0.52561	120765962	KO	cerebellum	female			Unknown
43	6-Phosphogluconate	6PG	IC-MS	S19_sample_a_mouse_cerebellum_male_KO_BEQ1047_37_BC8	12.64	0.18845	44578954	KO	cerebellum	male			Unknown
44	6-Phosphogluconate	6PG	IC-MS	S20_sample_a_mouse_cerebellum_female_KO_BEQ1075_38_BD1	12.65	0.02551	5099160	KO	cerebellum	female			Unknown
59	Aconitate	ACN	IC-MS	S11_sample_a_mouse_cerebellum_female_WT_BEQ994_28_BB8	15.17	0.77784	124922502	WT	cerebellum	female			Unknown
60	Aconitate	ACN	IC-MS	S12_sample_a_mouse_cerebellum_male_WT_BEQ998_29_BC1	15.18	0.54941	133691336	WT	cerebellum	male			Unknown
61	Aconitate	ACN	IC-MS	S13_sample_a_mouse_cerebellum_male_WT_BEQ999_30_BC2	15.17	0.66255	141473023	WT	cerebellum	male			Unknown
62	Aconitate	ACN	IC-MS	S14_sample_a_mouse_cerebellum_female_WT_BEQ1004_31_BC3	15.18	0.74289	191548567	WT	cerebellum	female			Unknown
63	Aconitate	ACN	IC-MS	S15_sample_a_mouse_cerebellum_female_WT_BEQ1006_32_BC4	15.18	0.64347	175891763	WT	cerebellum	female			Unknown
64	Aconitate	ACN	IC-MS	S16_sample_a_mouse_cerebellum_female_KO_BEQ996_34_BC5	15.17	0.83774	186908937	KO	cerebellum	female			Unknown
65	Aconitate	ACN	IC-MS	S17_sample_a_mouse_cerebellum_male_KO_BEQ1034_35_BC6	15.18	0.57958	83691774	KO	cerebellum	male			Unknown
66	Aconitate	ACN	IC-MS	S18_sample_a_mouse_cerebellum_female_KO_BEQ1041_36_BC7	15.18	0.56397	129579982	KO	cerebellum	female			Unknown
67	Aconitate	ACN	IC-MS	S19_sample_a_mouse_cerebellum_male_KO_BEQ1047_37_BC8	15.18	0.87991	208146917	KO	cerebellum	male			Unknown
68	Aconitate	ACN	IC-MS	S20_sample_a_mouse_cerebellum_female_KO_BEQ1075_38_BD1	15.17	0.60958	121866870	KO	cerebellum	female			Unknown
83	alpha-Ketoglutarate	KETO	IC-MS	S11_sample_a_mouse_cerebellum_female_WT_BEQ994_28_BB8	10.3	2.37608	381603111	WT	cerebellum	female			Unknown
84	alpha-Ketoglutarate	KETO	IC-MS	S12_sample_a_mouse_cerebellum_male_WT_BEQ998_29_BC1	10.36	1.71386	417040340	WT	cerebellum	male			Unknown
85	alpha-Ketoglutarate	KETO	IC-MS	S13_sample_a_mouse_cerebellum_male_WT_BEQ999_30_BC2	10.34	1.8477	394538783	WT	cerebellum	male			Unknown
86	alpha-Ketoglutarate	KETO	IC-MS	S14_sample_a_mouse_cerebellum_female_WT_BEQ1004_31_BC3	10.28	1.97778	509954742	WT	cerebellum	female			Unknown
87	alpha-Ketoglutarate	KETO	IC-MS	S15_sample_a_mouse_cerebellum_female_WT_BEQ1006_32_BC4	10.27	2.11102	577045315	WT	cerebellum	female			Unknown
88	alpha-Ketoglutarate	KETO	IC-MS	S16_sample_a_mouse_cerebellum_female_KO_BEQ996_34_BC5	10.33	1.8159	405146036	KO	cerebellum	female			Unknown
89	alpha-Ketoglutarate	KETO	IC-MS	S17_sample_a_mouse_cerebellum_male_KO_BEQ1034_35_BC6	10.32	3.01478	435335425	KO	cerebellum	male			Unknown
90	alpha-Ketoglutarate	KETO	IC-MS	S18_sample_a_mouse_cerebellum_female_KO_BEQ1041_36_BC7	10.31	2.04499	469864015	KO	cerebellum	female			Unknown
91	alpha-Ketoglutarate	KETO	IC-MS	S19_sample_a_mouse_cerebellum_male_KO_BEQ1047_37_BC8	10.33	2.17058	513458048	KO	cerebellum	male			Unknown
92	alpha-Ketoglutarate	KETO	IC-MS	S20_sample_a_mouse_cerebellum_female_KO_BEQ1075_38_BD1	10.31	2.17489	434806097	KO	cerebellum	female			Unknown
107	Citrate	CIT	IC-MS	S11_sample_a_mouse_cerebellum_female_WT_BEQ994_28_BB8	14.24	19.1073	3068667513	WT	cerebellum	female			Unknown
108	Citrate	CIT	IC-MS	S12_sample_a_mouse_cerebellum_male_WT_BEQ998_29_BC1	14.25	15.768	3836889911	WT	cerebellum	male			Unknown
109	Citrate	CIT	IC-MS	S13_sample_a_mouse_cerebellum_male_WT_BEQ999_30_BC2	14.26	18.1187	3868868877	WT	cerebellum	male			Unknown
110	Citrate	CIT	IC-MS	S14_sample_a_mouse_cerebellum_female_WT_BEQ1004_31_BC3	14.24	20.9514	5402126858	WT	cerebellum	female			Unknown
111	Citrate	CIT	IC-MS	S15_sample_a_mouse_cerebellum_female_WT_BEQ1006_32_BC4	14.24	19.8858	5435779714	WT	cerebellum	female			Unknown
112	Citrate	CIT	IC-MS	S16_sample_a_mouse_cerebellum_female_KO_BEQ996_34_BC5	14.23	19.6643	4387313176	KO	cerebellum	female			Unknown
113	Citrate	CIT	IC-MS	S17_sample_a_mouse_cerebellum_male_KO_BEQ1034_35_BC6	14.23	17.1176	2471786879	KO	cerebellum	male			Unknown
114	Citrate	CIT	IC-MS	S18_sample_a_mouse_cerebellum_female_KO_BEQ1041_36_BC7	14.24	17.7361	4075096115	KO	cerebellum	female			Unknown
115	Citrate	CIT	IC-MS	S19_sample_a_mouse_cerebellum_male_KO_BEQ1047_37_BC8	14.24	17.3697	4108876953	KO	cerebellum	male			Unknown
116	Citrate	CIT	IC-MS	S20_sample_a_mouse_cerebellum_female_KO_BEQ1075_38_BD1	14.23	14.8605	2970917954	KO	cerebellum	female			Unknown
131	Fructose-1-phosphate	F1P	IC-MS	S11_sample_a_mouse_cerebellum_female_WT_BEQ994_28_BB8	9.73	0.16547	12691055	WT	cerebellum	female			Unknown
132	Fructose-1-phosphate	F1P	IC-MS	S12_sample_a_mouse_cerebellum_male_WT_BEQ998_29_BC1	9.72	0.12793	15159555	WT	cerebellum	male			Unknown
133	Fructose-1-phosphate	F1P	IC-MS	S13_sample_a_mouse_cerebellum_male_WT_BEQ999_30_BC2	9.73	0.1313	15549541	WT	cerebellum	male			Unknown
134	Fructose-1-phosphate	F1P	IC-MS	S14_sample_a_mouse_cerebellum_female_WT_BEQ1004_31_BC3	9.73	0.23446	29353034	WT	cerebellum	female			Unknown
135	Fructose-1-phosphate	F1P	IC-MS	S15_sample_a_mouse_cerebellum_female_WT_BEQ1006_32_BC4	9.73	0.21169	26196611	WT	cerebellum	female			Unknown
136	Fructose-1-phosphate	F1P	IC-MS	S16_sample_a_mouse_cerebellum_female_KO_BEQ996_34_BC5	9.72	0.15632	17797810	KO	cerebellum	female			Unknown
137	Fructose-1-phosphate	F1P	IC-MS	S17_sample_a_mouse_cerebellum_male_KO_BEQ1034_35_BC6	9.73	0.18204	12235309	KO	cerebellum	male			Unknown
138	Fructose-1-phosphate	F1P	IC-MS	S18_sample_a_mouse_cerebellum_female_KO_BEQ1041_36_BC7	9.71	0.19471	19861231	KO	cerebellum	female			Unknown
139	Fructose-1-phosphate	F1P	IC-MS	S19_sample_a_mouse_cerebellum_male_KO_BEQ1047_37_BC8	9.73	0.23711	27654203	KO	cerebellum	male			Unknown
140	Fructose-1-phosphate	F1P	IC-MS	S20_sample_a_mouse_cerebellum_female_KO_BEQ1075_38_BD1	9.73	0.15724	14671174	KO	cerebellum	female			Unknown
155	Fructose-1,6-bisphosphate	F16P	IC-MS	S11_sample_a_mouse_cerebellum_female_WT_BEQ994_28_BB8	17.17	0.61541	47200070	WT	cerebellum	female			Unknown
156	Fructose-1,6-bisphosphate	F16P	IC-MS	S12_sample_a_mouse_cerebellum_male_WT_BEQ998_29_BC1	17.17	0.51381	60883705	WT	cerebellum	male			Unknown
157	Fructose-1,6-bisphosphate	F16P	IC-MS	S13_sample_a_mouse_cerebellum_male_WT_BEQ999_30_BC2	17.17	0.50882	60257475	WT	cerebellum	male			Unknown
158	Fructose-1,6-bisphosphate	F16P	IC-MS	S14_sample_a_mouse_cerebellum_female_WT_BEQ1004_31_BC3	17.16	1.08497	135829348	WT	cerebellum	female			Unknown
159	Fructose-1,6-bisphosphate	F16P	IC-MS	S15_sample_a_mouse_cerebellum_female_WT_BEQ1006_32_BC4	17.18	0.84639	104739212	WT	cerebellum	female			Unknown
160	Fructose-1,6-bisphosphate	F16P	IC-MS	S16_sample_a_mouse_cerebellum_female_KO_BEQ996_34_BC5	17.17	0.56572	64410324	KO	cerebellum	female			Unknown
161	Fructose-1,6-bisphosphate	F16P	IC-MS	S17_sample_a_mouse_cerebellum_male_KO_BEQ1034_35_BC6	17.18	0.75056	50446821	KO	cerebellum	male			Unknown
162	Fructose-1,6-bisphosphate	F16P	IC-MS	S18_sample_a_mouse_cerebellum_female_KO_BEQ1041_36_BC7	17.18	1.66529	169868037	KO	cerebellum	female			Unknown
163	Fructose-1,6-bisphosphate	F16P	IC-MS	S19_sample_a_mouse_cerebellum_male_KO_BEQ1047_37_BC8	17.16	0.71951	83918513	KO	cerebellum	male			Unknown
164	Fructose-1,6-bisphosphate	F16P	IC-MS	S20_sample_a_mouse_cerebellum_female_KO_BEQ1075_38_BD1	17.16	0.70563	65837963	KO	cerebellum	female			Unknown
179	Fructose-6-phosphate	F6P	IC-MS	S11_sample_a_mouse_cerebellum_female_WT_BEQ994_28_BB8	10.45	0.24645	18902163	WT	cerebellum	female			Unknown
180	Fructose-6-phosphate	F6P	IC-MS	S12_sample_a_mouse_cerebellum_male_WT_BEQ998_29_BC1	10.48	0.1393	16506734	WT	cerebellum	male			Unknown
181	Fructose-6-phosphate	F6P	IC-MS	S13_sample_a_mouse_cerebellum_male_WT_BEQ999_30_BC2	10.47	0.15426	18268713	WT	cerebellum	male			Unknown
182	Fructose-6-phosphate	F6P	IC-MS	S14_sample_a_mouse_cerebellum_female_WT_BEQ1004_31_BC3	10.46	0.29456	36876651	WT	cerebellum	female			Unknown
183	Fructose-6-phosphate	F6P	IC-MS	S15_sample_a_mouse_cerebellum_female_WT_BEQ1006_32_BC4	10.47	0.20063	24827646	WT	cerebellum	female			Unknown
184	Fructose-6-phosphate	F6P	IC-MS	S16_sample_a_mouse_cerebellum_female_KO_BEQ996_34_BC5	10.48	0.30207	34391601	KO	cerebellum	female			Unknown
185	Fructose-6-phosphate	F6P	IC-MS	S17_sample_a_mouse_cerebellum_male_KO_BEQ1034_35_BC6	10.46	0.24092	16192761	KO	cerebellum	male			Unknown
186	Fructose-6-phosphate	F6P	IC-MS	S18_sample_a_mouse_cerebellum_female_KO_BEQ1041_36_BC7	10.48	0.38462	39233143	KO	cerebellum	female			Unknown
187	Fructose-6-phosphate	F6P	IC-MS	S19_sample_a_mouse_cerebellum_male_KO_BEQ1047_37_BC8	10.46	0.60215	70230419	KO	cerebellum	male			Unknown
188	Fructose-6-phosphate	F6P	IC-MS	S20_sample_a_mouse_cerebellum_female_KO_BEQ1075_38_BD1	10.48	0.29752	27759276	KO	cerebellum	female			Unknown
203	Fumarate	FUM	IC-MS	S11_sample_a_mouse_cerebellum_female_WT_BEQ994_28_BB8	10.92	5.4457	874589098	WT	cerebellum	female			Unknown
204	Fumarate	FUM	IC-MS	S12_sample_a_mouse_cerebellum_male_WT_BEQ998_29_BC1	10.92	5.53867	1347748004	WT	cerebellum	male			Unknown
205	Fumarate	FUM	IC-MS	S13_sample_a_mouse_cerebellum_male_WT_BEQ999_30_BC2	10.91	5.78353	1234951854	WT	cerebellum	male			Unknown
206	Fumarate	FUM	IC-MS	S14_sample_a_mouse_cerebellum_female_WT_BEQ1004_31_BC3	10.91	6.13392	1581578432	WT	cerebellum	female			Unknown
207	Fumarate	FUM	IC-MS	S15_sample_a_mouse_cerebellum_female_WT_BEQ1006_32_BC4	10.92	5.74632	1570754414	WT	cerebellum	female			Unknown
208	Fumarate	FUM	IC-MS	S16_sample_a_mouse_cerebellum_female_KO_BEQ996_34_BC5	10.91	5.72497	1277298030	KO	cerebellum	female			Unknown
209	Fumarate	FUM	IC-MS	S17_sample_a_mouse_cerebellum_male_KO_BEQ1034_35_BC6	10.91	5.87478	848322236	KO	cerebellum	male			Unknown
210	Fumarate	FUM	IC-MS	S18_sample_a_mouse_cerebellum_female_KO_BEQ1041_36_BC7	10.92	4.95485	1138442436	KO	cerebellum	female			Unknown
211	Fumarate	FUM	IC-MS	S19_sample_a_mouse_cerebellum_male_KO_BEQ1047_37_BC8	10.91	5.64801	1336057016	KO	cerebellum	male			Unknown
212	Fumarate	FUM	IC-MS	S20_sample_a_mouse_cerebellum_female_KO_BEQ1075_38_BD1	10.92	4.94744	989096927	KO	cerebellum	female			Unknown
227	Glucose-1-phosphate	G1P	IC-MS	S11_sample_a_mouse_cerebellum_female_WT_BEQ994_28_BB8	7.6	1.2542	96193291	WT	cerebellum	female			Unknown
228	Glucose-1-phosphate	G1P	IC-MS	S12_sample_a_mouse_cerebellum_male_WT_BEQ998_29_BC1	7.59	0.72869	86346567	WT	cerebellum	male			Unknown
229	Glucose-1-phosphate	G1P	IC-MS	S13_sample_a_mouse_cerebellum_male_WT_BEQ999_30_BC2	7.6	0.81897	96986728	WT	cerebellum	male			Unknown
230	Glucose-1-phosphate	G1P	IC-MS	S14_sample_a_mouse_cerebellum_female_WT_BEQ1004_31_BC3	7.61	1.66803	208824337	WT	cerebellum	female			Unknown
231	Glucose-1-phosphate	G1P	IC-MS	S15_sample_a_mouse_cerebellum_female_WT_BEQ1006_32_BC4	7.58	1.5031	186007009	WT	cerebellum	female			Unknown
232	Glucose-1-phosphate	G1P	IC-MS	S16_sample_a_mouse_cerebellum_female_KO_BEQ996_34_BC5	7.6	1.61964	184403163	KO	cerebellum	female			Unknown
233	Glucose-1-phosphate	G1P	IC-MS	S17_sample_a_mouse_cerebellum_male_KO_BEQ1034_35_BC6	7.6	0.89041	59846446	KO	cerebellum	male			Unknown
234	Glucose-1-phosphate	G1P	IC-MS	S18_sample_a_mouse_cerebellum_female_KO_BEQ1041_36_BC7	7.61	1.39552	142350246	KO	cerebellum	female			Unknown
235	Glucose-1-phosphate	G1P	IC-MS	S19_sample_a_mouse_cerebellum_male_KO_BEQ1047_37_BC8	7.59	1.83131	213590414	KO	cerebellum	male			Unknown
236	Glucose-1-phosphate	G1P	IC-MS	S20_sample_a_mouse_cerebellum_female_KO_BEQ1075_38_BD1	7.59	0.94654	88315417	KO	cerebellum	female			Unknown
251	Glucose-6-phosphate	G6P	IC-MS	S11_sample_a_mouse_cerebellum_female_WT_BEQ994_28_BB8	10.21	0.97212	74558824	WT	cerebellum	female			Unknown
252	Glucose-6-phosphate	G6P	IC-MS	S12_sample_a_mouse_cerebellum_male_WT_BEQ998_29_BC1	10.21	0.55111	65304026	WT	cerebellum	male			Unknown
253	Glucose-6-phosphate	G6P	IC-MS	S13_sample_a_mouse_cerebellum_male_WT_BEQ999_30_BC2	10.22	0.64737	76664858	WT	cerebellum	male			Unknown
254	Glucose-6-phosphate	G6P	IC-MS	S14_sample_a_mouse_cerebellum_female_WT_BEQ1004_31_BC3	10.22	1.27815	160015061	WT	cerebellum	female			Unknown
255	Glucose-6-phosphate	G6P	IC-MS	S15_sample_a_mouse_cerebellum_female_WT_BEQ1006_32_BC4	10.23	0.90547	112051263	WT	cerebellum	female			Unknown
256	Glucose-6-phosphate	G6P	IC-MS	S16_sample_a_mouse_cerebellum_female_KO_BEQ996_34_BC5	10.22	1.30778	148896740	KO	cerebellum	female			Unknown
257	Glucose-6-phosphate	G6P	IC-MS	S17_sample_a_mouse_cerebellum_male_KO_BEQ1034_35_BC6	10.22	1.20748	81157690	KO	cerebellum	male			Unknown
258	Glucose-6-phosphate	G6P	IC-MS	S18_sample_a_mouse_cerebellum_female_KO_BEQ1041_36_BC7	10.23	1.85477	189195436	KO	cerebellum	female			Unknown
259	Glucose-6-phosphate	G6P	IC-MS	S19_sample_a_mouse_cerebellum_male_KO_BEQ1047_37_BC8	10.22	2.45421	286240397	KO	cerebellum	male			Unknown
260	Glucose-6-phosphate	G6P	IC-MS	S20_sample_a_mouse_cerebellum_female_KO_BEQ1075_38_BD1	10.22	1.23817	115525349	KO	cerebellum	female			Unknown
275	Hexose	HEX	IC-MS	S11_sample_a_mouse_cerebellum_female_WT_BEQ994_28_BB8	2.85	12.9756	995185397	WT	cerebellum	female			Unknown
276	Hexose	HEX	IC-MS	S12_sample_a_mouse_cerebellum_male_WT_BEQ998_29_BC1	2.9	11.3298	1342535414	WT	cerebellum	male			Unknown
277	Hexose	HEX	IC-MS	S13_sample_a_mouse_cerebellum_male_WT_BEQ999_30_BC2	2.87	11.4635	1357569747	WT	cerebellum	male			Unknown
278	Hexose	HEX	IC-MS	S14_sample_a_mouse_cerebellum_female_WT_BEQ1004_31_BC3	2.88	12.0229	1505172295	WT	cerebellum	female			Unknown
279	Hexose	HEX	IC-MS	S15_sample_a_mouse_cerebellum_female_WT_BEQ1006_32_BC4	2.88	11.5484	1429102466	WT	cerebellum	female			Unknown
280	Hexose	HEX	IC-MS	S16_sample_a_mouse_cerebellum_female_KO_BEQ996_34_BC5	2.88	11.0008	1252497138	KO	cerebellum	female			Unknown
281	Hexose	HEX	IC-MS	S17_sample_a_mouse_cerebellum_male_KO_BEQ1034_35_BC6	2.86	16.9635	1140160463	KO	cerebellum	male			Unknown
282	Hexose	HEX	IC-MS	S18_sample_a_mouse_cerebellum_female_KO_BEQ1041_36_BC7	2.85	11.9152	1215414924	KO	cerebellum	female			Unknown
283	Hexose	HEX	IC-MS	S19_sample_a_mouse_cerebellum_male_KO_BEQ1047_37_BC8	2.86	12.0945	1410607900	KO	cerebellum	male			Unknown
284	Hexose	HEX	IC-MS	S20_sample_a_mouse_cerebellum_female_KO_BEQ1075_38_BD1	2.84	13.5106	1260589031	KO	cerebellum	female			Unknown
299	Isocitrate	ICI	IC-MS	S11_sample_a_mouse_cerebellum_female_WT_BEQ994_28_BB8	14.72	0.97309	156280142	WT	cerebellum	female			Unknown
300	Isocitrate	ICI	IC-MS	S12_sample_a_mouse_cerebellum_male_WT_BEQ998_29_BC1	14.73	0.93724	228061537	WT	cerebellum	male			Unknown
301	Isocitrate	ICI	IC-MS	S13_sample_a_mouse_cerebellum_male_WT_BEQ999_30_BC2	14.72	1.04758	223689628	WT	cerebellum	male			Unknown
302	Isocitrate	ICI	IC-MS	S14_sample_a_mouse_cerebellum_female_WT_BEQ1004_31_BC3	14.72	1.31694	339562413	WT	cerebellum	female			Unknown
303	Isocitrate	ICI	IC-MS	S15_sample_a_mouse_cerebellum_female_WT_BEQ1006_32_BC4	14.74	1.17435	321007646	WT	cerebellum	female			Unknown
304	Isocitrate	ICI	IC-MS	S16_sample_a_mouse_cerebellum_female_KO_BEQ996_34_BC5	14.72	1.42261	317399017	KO	cerebellum	female			Unknown
305	Isocitrate	ICI	IC-MS	S17_sample_a_mouse_cerebellum_male_KO_BEQ1034_35_BC6	14.73	0.85749	123821962	KO	cerebellum	male			Unknown
306	Isocitrate	ICI	IC-MS	S18_sample_a_mouse_cerebellum_female_KO_BEQ1041_36_BC7	14.72	1.01125	232346995	KO	cerebellum	female			Unknown
307	Isocitrate	ICI	IC-MS	S19_sample_a_mouse_cerebellum_male_KO_BEQ1047_37_BC8	14.72	1.32856	314275483	KO	cerebellum	male			Unknown
308	Isocitrate	ICI	IC-MS	S20_sample_a_mouse_cerebellum_female_KO_BEQ1075_38_BD1	14.72	0.9799	195902460	KO	cerebellum	female			Unknown
323	Lactate	LAC	IC-MS	S11_sample_a_mouse_cerebellum_female_WT_BEQ994_28_BB8	2.88	376.917	60533528922	WT	cerebellum	female			Unknown
324	Lactate	LAC	IC-MS	S12_sample_a_mouse_cerebellum_male_WT_BEQ998_29_BC1	2.87	312.288	75990366394	WT	cerebellum	male			Unknown
325	Lactate	LAC	IC-MS	S13_sample_a_mouse_cerebellum_male_WT_BEQ999_30_BC2	2.88	328.916	70233070737	WT	cerebellum	male			Unknown
326	Lactate	LAC	IC-MS	S14_sample_a_mouse_cerebellum_female_WT_BEQ1004_31_BC3	2.87	298.662	77007374613	WT	cerebellum	female			Unknown
327	Lactate	LAC	IC-MS	S15_sample_a_mouse_cerebellum_female_WT_BEQ1006_32_BC4	2.9	282.695	77274548215	WT	cerebellum	female			Unknown
328	Lactate	LAC	IC-MS	S16_sample_a_mouse_cerebellum_female_KO_BEQ996_34_BC5	2.88	305.206	68094430375	KO	cerebellum	female			Unknown
329	Lactate	LAC	IC-MS	S17_sample_a_mouse_cerebellum_male_KO_BEQ1034_35_BC6	2.86	410.534	59281370561	KO	cerebellum	male			Unknown
330	Lactate	LAC	IC-MS	S18_sample_a_mouse_cerebellum_female_KO_BEQ1041_36_BC7	2.85	287.137	65973531209	KO	cerebellum	female			Unknown
331	Lactate	LAC	IC-MS	S19_sample_a_mouse_cerebellum_male_KO_BEQ1047_37_BC8	2.89	326.665	77273743880	KO	cerebellum	male			Unknown
332	Lactate	LAC	IC-MS	S20_sample_a_mouse_cerebellum_female_KO_BEQ1075_38_BD1	2.85	341.677	68308376916	KO	cerebellum	female			Unknown
347	Malate	MAL	IC-MS	S11_sample_a_mouse_cerebellum_female_WT_BEQ994_28_BB8	9.01	42.459	6818987991	WT	cerebellum	female			Unknown
348	Malate	MAL	IC-MS	S12_sample_a_mouse_cerebellum_male_WT_BEQ998_29_BC1	9.01	37.9521	9235029674	WT	cerebellum	male			Unknown
349	Malate	MAL	IC-MS	S13_sample_a_mouse_cerebellum_male_WT_BEQ999_30_BC2	9.02	40.9268	8739072851	WT	cerebellum	male			Unknown
350	Malate	MAL	IC-MS	S14_sample_a_mouse_cerebellum_female_WT_BEQ1004_31_BC3	9.01	46.7975	12066338996	WT	cerebellum	female			Unknown
351	Malate	MAL	IC-MS	S15_sample_a_mouse_cerebellum_female_WT_BEQ1006_32_BC4	9.01	43.4128	11866884959	WT	cerebellum	female			Unknown
352	Malate	MAL	IC-MS	S16_sample_a_mouse_cerebellum_female_KO_BEQ996_34_BC5	9.01	52.3775	11685933045	KO	cerebellum	female			Unknown
353	Malate	MAL	IC-MS	S17_sample_a_mouse_cerebellum_male_KO_BEQ1034_35_BC6	9	52.9935	7652298683	KO	cerebellum	male			Unknown
354	Malate	MAL	IC-MS	S18_sample_a_mouse_cerebellum_female_KO_BEQ1041_36_BC7	9.01	45.0177	10343404935	KO	cerebellum	female			Unknown
355	Malate	MAL	IC-MS	S19_sample_a_mouse_cerebellum_male_KO_BEQ1047_37_BC8	8.99	48.7748	11537862008	KO	cerebellum	male			Unknown
356	Malate	MAL	IC-MS	S20_sample_a_mouse_cerebellum_female_KO_BEQ1075_38_BD1	9.01	47.0118	9398646568	KO	cerebellum	female			Unknown
371	Mannose-6-phosphate	M6P	IC-MS	S11_sample_a_mouse_cerebellum_female_WT_BEQ994_28_BB8	10.68	0.4021	30839710	WT	cerebellum	female			Unknown
372	Mannose-6-phosphate	M6P	IC-MS	S12_sample_a_mouse_cerebellum_male_WT_BEQ998_29_BC1	10.69	0.2742	32491971	WT	cerebellum	male			Unknown
373	Mannose-6-phosphate	M6P	IC-MS	S13_sample_a_mouse_cerebellum_male_WT_BEQ999_30_BC2	10.68	0.27813	32937807	WT	cerebellum	male			Unknown
374	Mannose-6-phosphate	M6P	IC-MS	S14_sample_a_mouse_cerebellum_female_WT_BEQ1004_31_BC3	10.66	0.43229	54119334	WT	cerebellum	female			Unknown
375	Mannose-6-phosphate	M6P	IC-MS	S15_sample_a_mouse_cerebellum_female_WT_BEQ1006_32_BC4	10.67	0.35156	43505706	WT	cerebellum	female			Unknown
376	Mannose-6-phosphate	M6P	IC-MS	S16_sample_a_mouse_cerebellum_female_KO_BEQ996_34_BC5	10.68	0.4859	55322245	KO	cerebellum	female			Unknown
377	Mannose-6-phosphate	M6P	IC-MS	S17_sample_a_mouse_cerebellum_male_KO_BEQ1034_35_BC6	10.67	0.42618	28644350	KO	cerebellum	male			Unknown
378	Mannose-6-phosphate	M6P	IC-MS	S18_sample_a_mouse_cerebellum_female_KO_BEQ1041_36_BC7	10.66	0.58927	60108759	KO	cerebellum	female			Unknown
379	Mannose-6-phosphate	M6P	IC-MS	S19_sample_a_mouse_cerebellum_male_KO_BEQ1047_37_BC8	10.66	0.83254	97101492	KO	cerebellum	male			Unknown
380	Mannose-6-phosphate	M6P	IC-MS	S20_sample_a_mouse_cerebellum_female_KO_BEQ1075_38_BD1	10.69	0.49032	45748469	KO	cerebellum	female			Unknown
395	Pentose	PENT	IC-MS	S11_sample_a_mouse_cerebellum_female_WT_BEQ994_28_BB8	2.4	0.40183	30818761	WT	cerebellum	female			Unknown
396	Pentose	PENT	IC-MS	S12_sample_a_mouse_cerebellum_male_WT_BEQ998_29_BC1	2.4	0.31063	36808228	WT	cerebellum	male			Unknown
397	Pentose	PENT	IC-MS	S13_sample_a_mouse_cerebellum_male_WT_BEQ999_30_BC2	2.37	0.25811	30566265	WT	cerebellum	male			Unknown
398	Pentose	PENT	IC-MS	S14_sample_a_mouse_cerebellum_female_WT_BEQ1004_31_BC3	2.38	0.25554	31991005	WT	cerebellum	female			Unknown
399	Pentose	PENT	IC-MS	S15_sample_a_mouse_cerebellum_female_WT_BEQ1006_32_BC4	2.38	0.26351	32609541	WT	cerebellum	female			Unknown
400	Pentose	PENT	IC-MS	S16_sample_a_mouse_cerebellum_female_KO_BEQ996_34_BC5	2.38	0.30701	34954639	KO	cerebellum	female			Unknown
401	Pentose	PENT	IC-MS	S17_sample_a_mouse_cerebellum_male_KO_BEQ1034_35_BC6	2.39	0.35835	24085924	KO	cerebellum	male			Unknown
402	Pentose	PENT	IC-MS	S18_sample_a_mouse_cerebellum_female_KO_BEQ1041_36_BC7	2.38	0.35661	36375521	KO	cerebellum	female			Unknown
403	Pentose	PENT	IC-MS	S19_sample_a_mouse_cerebellum_male_KO_BEQ1047_37_BC8	2.4	0.31745	37025065	KO	cerebellum	male			Unknown
404	Pentose	PENT	IC-MS	S20_sample_a_mouse_cerebellum_female_KO_BEQ1075_38_BD1	2.39	0.33932	31659332	KO	cerebellum	female			Unknown
419	Pentose-5-phosphate	P5P	IC-MS	S11_sample_a_mouse_cerebellum_female_WT_BEQ994_28_BB8	10.94	1.86107	142738304	WT	cerebellum	female			Unknown
420	Pentose-5-phosphate	P5P	IC-MS	S12_sample_a_mouse_cerebellum_male_WT_BEQ998_29_BC1	10.95	1.85776	220136920	WT	cerebellum	male			Unknown
421	Pentose-5-phosphate	P5P	IC-MS	S13_sample_a_mouse_cerebellum_male_WT_BEQ999_30_BC2	10.95	1.20752	143000724	WT	cerebellum	male			Unknown
422	Pentose-5-phosphate	P5P	IC-MS	S14_sample_a_mouse_cerebellum_female_WT_BEQ1004_31_BC3	10.96	1.46844	183837458	WT	cerebellum	female			Unknown
423	Pentose-5-phosphate	P5P	IC-MS	S15_sample_a_mouse_cerebellum_female_WT_BEQ1006_32_BC4	10.96	1.42185	175952642	WT	cerebellum	female			Unknown
424	Pentose-5-phosphate	P5P	IC-MS	S16_sample_a_mouse_cerebellum_female_KO_BEQ996_34_BC5	10.94	2.00617	228411445	KO	cerebellum	female			Unknown
425	Pentose-5-phosphate	P5P	IC-MS	S17_sample_a_mouse_cerebellum_male_KO_BEQ1034_35_BC6	10.94	1.83727	123487739	KO	cerebellum	male			Unknown
426	Pentose-5-phosphate	P5P	IC-MS	S18_sample_a_mouse_cerebellum_female_KO_BEQ1041_36_BC7	10.95	1.85564	189284317	KO	cerebellum	female			Unknown
427	Pentose-5-phosphate	P5P	IC-MS	S19_sample_a_mouse_cerebellum_male_KO_BEQ1047_37_BC8	10.95	3.57297	416723848	KO	cerebellum	male			Unknown
428	Pentose-5-phosphate	P5P	IC-MS	S20_sample_a_mouse_cerebellum_female_KO_BEQ1075_38_BD1	10.95	1.98248	184972283	KO	cerebellum	female			Unknown
443	Phosphoenolpyruvate	PEP	IC-MS	S11_sample_a_mouse_cerebellum_female_WT_BEQ994_28_BB8	15.15	0.10024	16098471	WT	cerebellum	female			Unknown
444	Phosphoenolpyruvate	PEP	IC-MS	S12_sample_a_mouse_cerebellum_male_WT_BEQ998_29_BC1	15.15	0.10288	25035302	WT	cerebellum	male			Unknown
445	Phosphoenolpyruvate	PEP	IC-MS	S13_sample_a_mouse_cerebellum_male_WT_BEQ999_30_BC2	15.15	0.10809	23079441	WT	cerebellum	male			Unknown
446	Phosphoenolpyruvate	PEP	IC-MS	S14_sample_a_mouse_cerebellum_female_WT_BEQ1004_31_BC3	15.14	0.10537	27168502	WT	cerebellum	female			Unknown
447	Phosphoenolpyruvate	PEP	IC-MS	S15_sample_a_mouse_cerebellum_female_WT_BEQ1006_32_BC4	15.16	0.09224	25214834	WT	cerebellum	female			Unknown
448	Phosphoenolpyruvate	PEP	IC-MS	S16_sample_a_mouse_cerebellum_female_KO_BEQ996_34_BC5	15.15	0.08144	18169618	KO	cerebellum	female			Unknown
449	Phosphoenolpyruvate	PEP	IC-MS	S17_sample_a_mouse_cerebellum_male_KO_BEQ1034_35_BC6	15.15	0.08566	12369307	KO	cerebellum	male			Unknown
450	Phosphoenolpyruvate	PEP	IC-MS	S18_sample_a_mouse_cerebellum_female_KO_BEQ1041_36_BC7	15.15	0.08498	19525741	KO	cerebellum	female			Unknown
451	Phosphoenolpyruvate	PEP	IC-MS	S19_sample_a_mouse_cerebellum_male_KO_BEQ1047_37_BC8	15.14	0.07155	16925281	KO	cerebellum	male			Unknown
452	Phosphoenolpyruvate	PEP	IC-MS	S20_sample_a_mouse_cerebellum_female_KO_BEQ1075_38_BD1	15.15	0.07315	14623962	KO	cerebellum	female			Unknown
467	Pyruvate	PYR	IC-MS	S11_sample_a_mouse_cerebellum_female_WT_BEQ994_28_BB8	3.52	1.04207	167358795	WT	cerebellum	female			Unknown
468	Pyruvate	PYR	IC-MS	S12_sample_a_mouse_cerebellum_male_WT_BEQ998_29_BC1	3.52	1.57058	382175091	WT	cerebellum	male			Unknown
469	Pyruvate	PYR	IC-MS	S13_sample_a_mouse_cerebellum_male_WT_BEQ999_30_BC2	3.51	0.79566	169896016	WT	cerebellum	male			Unknown
470	Pyruvate	PYR	IC-MS	S14_sample_a_mouse_cerebellum_female_WT_BEQ1004_31_BC3	3.52	0.91673	236371705	WT	cerebellum	female			Unknown
471	Pyruvate	PYR	IC-MS	S15_sample_a_mouse_cerebellum_female_WT_BEQ1006_32_BC4	3.52	0.7382	201787965	WT	cerebellum	female			Unknown
472	Pyruvate	PYR	IC-MS	S16_sample_a_mouse_cerebellum_female_KO_BEQ996_34_BC5	3.53	0.51189	114206944	KO	cerebellum	female			Unknown
473	Pyruvate	PYR	IC-MS	S17_sample_a_mouse_cerebellum_male_KO_BEQ1034_35_BC6	3.51	1.55936	225171818	KO	cerebellum	male			Unknown
474	Pyruvate	PYR	IC-MS	S18_sample_a_mouse_cerebellum_female_KO_BEQ1041_36_BC7	3.52	1.20593	277077166	KO	cerebellum	female			Unknown
475	Pyruvate	PYR	IC-MS	S19_sample_a_mouse_cerebellum_male_KO_BEQ1047_37_BC8	3.52	2.00339	473908181	KO	cerebellum	male			Unknown
476	Pyruvate	PYR	IC-MS	S20_sample_a_mouse_cerebellum_female_KO_BEQ1075_38_BD1	3.53	0.84936	169805115	KO	cerebellum	female			Unknown
491	Sedoheptulose-7-phosphate	S7P	IC-MS	S11_sample_a_mouse_cerebellum_female_WT_BEQ994_28_BB8	11.21	0.43444	33320089	WT	cerebellum	female			Unknown
492	Sedoheptulose-7-phosphate	S7P	IC-MS	S12_sample_a_mouse_cerebellum_male_WT_BEQ998_29_BC1	11.22	0.37304	44203887	WT	cerebellum	male			Unknown
493	Sedoheptulose-7-phosphate	S7P	IC-MS	S13_sample_a_mouse_cerebellum_male_WT_BEQ999_30_BC2	11.24	0.35198	41683035	WT	cerebellum	male			Unknown
494	Sedoheptulose-7-phosphate	S7P	IC-MS	S14_sample_a_mouse_cerebellum_female_WT_BEQ1004_31_BC3	11.22	0.47282	59193924	WT	cerebellum	female			Unknown
495	Sedoheptulose-7-phosphate	S7P	IC-MS	S15_sample_a_mouse_cerebellum_female_WT_BEQ1006_32_BC4	11.22	0.43651	54017022	WT	cerebellum	female			Unknown
496	Sedoheptulose-7-phosphate	S7P	IC-MS	S16_sample_a_mouse_cerebellum_female_KO_BEQ996_34_BC5	11.21	0.64941	73938465	KO	cerebellum	female			Unknown
497	Sedoheptulose-7-phosphate	S7P	IC-MS	S17_sample_a_mouse_cerebellum_male_KO_BEQ1034_35_BC6	11.22	0.52615	35363777	KO	cerebellum	male			Unknown
498	Sedoheptulose-7-phosphate	S7P	IC-MS	S18_sample_a_mouse_cerebellum_female_KO_BEQ1041_36_BC7	11.23	0.67015	68358901	KO	cerebellum	female			Unknown
499	Sedoheptulose-7-phosphate	S7P	IC-MS	S19_sample_a_mouse_cerebellum_male_KO_BEQ1047_37_BC8	11.21	0.73369	85571431	KO	cerebellum	male			Unknown
500	Sedoheptulose-7-phosphate	S7P	IC-MS	S20_sample_a_mouse_cerebellum_female_KO_BEQ1075_38_BD1	11.22	0.67603	63076100	KO	cerebellum	female			Unknown
515	Succinate	SUC	IC-MS	S11_sample_a_mouse_cerebellum_female_WT_BEQ994_28_BB8	9.01	16.581	2662939647	WT	cerebellum	female			Unknown
516	Succinate	SUC	IC-MS	S12_sample_a_mouse_cerebellum_male_WT_BEQ998_29_BC1	9.01	19.7427	4804069483	WT	cerebellum	male			Unknown
517	Succinate	SUC	IC-MS	S13_sample_a_mouse_cerebellum_male_WT_BEQ999_30_BC2	9.03	14.6824	3135125625	WT	cerebellum	male			Unknown
518	Succinate	SUC	IC-MS	S14_sample_a_mouse_cerebellum_female_WT_BEQ1004_31_BC3	8.95	13.7743	3551584574	WT	cerebellum	female			Unknown
519	Succinate	SUC	IC-MS	S15_sample_a_mouse_cerebellum_female_WT_BEQ1006_32_BC4	8.96	10.3326	2824420328	WT	cerebellum	female			Unknown
520	Succinate	SUC	IC-MS	S16_sample_a_mouse_cerebellum_female_KO_BEQ996_34_BC5	9.02	14.4817	3231022338	KO	cerebellum	female			Unknown
521	Succinate	SUC	IC-MS	S17_sample_a_mouse_cerebellum_male_KO_BEQ1034_35_BC6	9.02	17.4839	2524682070	KO	cerebellum	male			Unknown
522	Succinate	SUC	IC-MS	S18_sample_a_mouse_cerebellum_female_KO_BEQ1041_36_BC7	8.98	9.75171	2240582368	KO	cerebellum	female			Unknown
523	Succinate	SUC	IC-MS	S19_sample_a_mouse_cerebellum_male_KO_BEQ1047_37_BC8	8.96	8.30163	1963781146	KO	cerebellum	male			Unknown
524	Succinate	SUC	IC-MS	S20_sample_a_mouse_cerebellum_female_KO_BEQ1075_38_BD1	9.01	9.70565	1940362468	KO	cerebellum	female			Unknown
21	(2+3)-Phosphoglycerate	2PG+3PG	IC-MS	S22_blankIS_a_NA_NA_NA_NA_NA_41_BD3	13.54	4e-05	8850						Blank
22	(2+3)-Phosphoglycerate	2PG+3PG	IC-MS	S23_QC_a_mouse_NA_NA_NA_NA_06_BA3	13.5	0.80916	163806785						Quality Control
23	(2+3)-Phosphoglycerate	2PG+3PG	IC-MS	S23_QC_a_mouse_NA_NA_NA_NA_23_BA3	13.5	0.66469	124581082						Quality Control
24	(2+3)-Phosphoglycerate	2PG+3PG	IC-MS	S23_QC_a_mouse_NA_NA_NA_NA_43_BA3	13.48	0.66838	128584402						Quality Control
45	6-Phosphogluconate	6PG	IC-MS	S22_blankIS_a_NA_NA_NA_NA_NA_41_BD3	12.66	2e-05	4843						Blank
46	6-Phosphogluconate	6PG	IC-MS	S23_QC_a_mouse_NA_NA_NA_NA_06_BA3	12.65	0.08084	16364615						Quality Control
47	6-Phosphogluconate	6PG	IC-MS	S23_QC_a_mouse_NA_NA_NA_NA_23_BA3	12.64	0.06926	12980767						Quality Control
48	6-Phosphogluconate	6PG	IC-MS	S23_QC_a_mouse_NA_NA_NA_NA_43_BA3	12.64	0.06401	12315309						Quality Control
69	Aconitate	ACN	IC-MS	S22_blankIS_a_NA_NA_NA_NA_NA_41_BD3	15.18	0.00042	90191						Blank
70	Aconitate	ACN	IC-MS	S23_QC_a_mouse_NA_NA_NA_NA_06_BA3	15.17	0.7276	147295753						Quality Control
71	Aconitate	ACN	IC-MS	S23_QC_a_mouse_NA_NA_NA_NA_23_BA3	15.16	0.49261	92328213						Quality Control
72	Aconitate	ACN	IC-MS	S23_QC_a_mouse_NA_NA_NA_NA_43_BA3	15.15	0.54379	104616877						Quality Control
93	alpha-Ketoglutarate	KETO	IC-MS	S22_blankIS_a_NA_NA_NA_NA_NA_41_BD3	10.34	0.0015	319291						Blank
94	alpha-Ketoglutarate	KETO	IC-MS	S23_QC_a_mouse_NA_NA_NA_NA_06_BA3	10.35	1.50179	304022038						Quality Control
95	alpha-Ketoglutarate	KETO	IC-MS	S23_QC_a_mouse_NA_NA_NA_NA_23_BA3	10.35	1.8099	339225539						Quality Control
96	alpha-Ketoglutarate	KETO	IC-MS	S23_QC_a_mouse_NA_NA_NA_NA_43_BA3	10.28	2.52134	485064765						Quality Control
117	Citrate	CIT	IC-MS	S22_blankIS_a_NA_NA_NA_NA_NA_41_BD3	14.25	0.01253	2662864						Blank
118	Citrate	CIT	IC-MS	S23_QC_a_mouse_NA_NA_NA_NA_06_BA3	14.24	15.8828	3215301753						Quality Control
119	Citrate	CIT	IC-MS	S23_QC_a_mouse_NA_NA_NA_NA_23_BA3	14.24	15.7827	2958100626						Quality Control
120	Citrate	CIT	IC-MS	S23_QC_a_mouse_NA_NA_NA_NA_43_BA3	14.22	15.6144	3003946543						Quality Control
141	Fructose-1-phosphate	F1P	IC-MS	S22_blankIS_a_NA_NA_NA_NA_NA_41_BD3	9.71	4e-05	3626						Blank
142	Fructose-1-phosphate	F1P	IC-MS	S23_QC_a_mouse_NA_NA_NA_NA_06_BA3	9.72	0.15542	11851948						Quality Control
143	Fructose-1-phosphate	F1P	IC-MS	S23_QC_a_mouse_NA_NA_NA_NA_23_BA3	9.71	0.15802	10079879						Quality Control
144	Fructose-1-phosphate	F1P	IC-MS	S23_QC_a_mouse_NA_NA_NA_NA_43_BA3	9.69	0.15703	10341455						Quality Control
165	Fructose-1,6-bisphosphate	F16P	IC-MS	S22_blankIS_a_NA_NA_NA_NA_NA_41_BD3	17.17	6e-05	5887						Blank
166	Fructose-1,6-bisphosphate	F16P	IC-MS	S23_QC_a_mouse_NA_NA_NA_NA_06_BA3	17.18	0.4372	33338906						Quality Control
167	Fructose-1,6-bisphosphate	F16P	IC-MS	S23_QC_a_mouse_NA_NA_NA_NA_23_BA3	17.17	0.39719	25336024						Quality Control
168	Fructose-1,6-bisphosphate	F16P	IC-MS	S23_QC_a_mouse_NA_NA_NA_NA_43_BA3	17.17	0.39398	25945986						Quality Control
189	Fructose-6-phosphate	F6P	IC-MS	S22_blankIS_a_NA_NA_NA_NA_NA_41_BD3	10.48	6e-05	5801						Blank
190	Fructose-6-phosphate	F6P	IC-MS	S23_QC_a_mouse_NA_NA_NA_NA_06_BA3	10.48	0.20247	15439552						Quality Control
191	Fructose-6-phosphate	F6P	IC-MS	S23_QC_a_mouse_NA_NA_NA_NA_23_BA3	10.46	0.17034	10865632						Quality Control
192	Fructose-6-phosphate	F6P	IC-MS	S23_QC_a_mouse_NA_NA_NA_NA_43_BA3	10.46	0.16729	11016948						Quality Control
213	Fumarate	FUM	IC-MS	S22_blankIS_a_NA_NA_NA_NA_NA_41_BD3	10.91	0.00424	901374						Blank
214	Fumarate	FUM	IC-MS	S23_QC_a_mouse_NA_NA_NA_NA_06_BA3	10.92	4.22378	855060815						Quality Control
215	Fumarate	FUM	IC-MS	S23_QC_a_mouse_NA_NA_NA_NA_23_BA3	10.91	4.19864	786939152						Quality Control
216	Fumarate	FUM	IC-MS	S23_QC_a_mouse_NA_NA_NA_NA_43_BA3	10.91	3.91334	752861904						Quality Control
237	Glucose-1-phosphate	G1P	IC-MS	S22_blankIS_a_NA_NA_NA_NA_NA_41_BD3	7.6	9e-05	8364						Blank
238	Glucose-1-phosphate	G1P	IC-MS	S23_QC_a_mouse_NA_NA_NA_NA_06_BA3	7.6	1.80476	137623992						Quality Control
239	Glucose-1-phosphate	G1P	IC-MS	S23_QC_a_mouse_NA_NA_NA_NA_23_BA3	7.59	1.87055	119318994						Quality Control
240	Glucose-1-phosphate	G1P	IC-MS	S23_QC_a_mouse_NA_NA_NA_NA_43_BA3	7.58	1.8626	122663776						Quality Control
261	Glucose-6-phosphate	G6P	IC-MS	S22_blankIS_a_NA_NA_NA_NA_NA_41_BD3	10.21	0.00016	14503						Blank
262	Glucose-6-phosphate	G6P	IC-MS	S23_QC_a_mouse_NA_NA_NA_NA_06_BA3	10.22	0.73813	56286451						Quality Control
263	Glucose-6-phosphate	G6P	IC-MS	S23_QC_a_mouse_NA_NA_NA_NA_23_BA3	10.22	0.71805	45803355						Quality Control
264	Glucose-6-phosphate	G6P	IC-MS	S23_QC_a_mouse_NA_NA_NA_NA_43_BA3	10.21	0.72076	47466797						Quality Control
285	Hexose	HEX	IC-MS	S22_blankIS_a_NA_NA_NA_NA_NA_41_BD3	2.77	0.00394	361280						Blank
286	Hexose	HEX	IC-MS	S23_QC_a_mouse_NA_NA_NA_NA_06_BA3	2.86	11.9173	908766653						Quality Control
287	Hexose	HEX	IC-MS	S23_QC_a_mouse_NA_NA_NA_NA_23_BA3	2.86	16.7757	1070092249						Quality Control
288	Hexose	HEX	IC-MS	S23_QC_a_mouse_NA_NA_NA_NA_43_BA3	2.85	15.332	1009707067						Quality Control
309	Isocitrate	ICI	IC-MS	S22_blankIS_a_NA_NA_NA_NA_NA_41_BD3	14.74	0.00047	99829						Blank
310	Isocitrate	ICI	IC-MS	S23_QC_a_mouse_NA_NA_NA_NA_06_BA3	14.71	0.81228	164438076						Quality Control
311	Isocitrate	ICI	IC-MS	S23_QC_a_mouse_NA_NA_NA_NA_23_BA3	14.72	0.61386	115054133						Quality Control
312	Isocitrate	ICI	IC-MS	S23_QC_a_mouse_NA_NA_NA_NA_43_BA3	14.71	0.69631	133959004						Quality Control
333	Lactate	LAC	IC-MS	S22_blankIS_a_NA_NA_NA_NA_NA_41_BD3	2.85	3.02664	643413805						Blank
334	Lactate	LAC	IC-MS	S23_QC_a_mouse_NA_NA_NA_NA_06_BA3	2.86	296.691	60062069837						Quality Control
335	Lactate	LAC	IC-MS	S23_QC_a_mouse_NA_NA_NA_NA_23_BA3	2.86	311.79	58438026603						Quality Control
336	Lactate	LAC	IC-MS	S23_QC_a_mouse_NA_NA_NA_NA_43_BA3	2.84	303.367	58362814001						Quality Control
357	Malate	MAL	IC-MS	S22_blankIS_a_NA_NA_NA_NA_NA_41_BD3	8.99	0.01994	4238540						Blank
358	Malate	MAL	IC-MS	S23_QC_a_mouse_NA_NA_NA_NA_06_BA3	9	34.1241	6908063856						Quality Control
359	Malate	MAL	IC-MS	S23_QC_a_mouse_NA_NA_NA_NA_23_BA3	8.99	35.1111	6580779065						Quality Control
360	Malate	MAL	IC-MS	S23_QC_a_mouse_NA_NA_NA_NA_43_BA3	8.99	34.934	6720718911						Quality Control
381	Mannose-6-phosphate	M6P	IC-MS	S22_blankIS_a_NA_NA_NA_NA_NA_41_BD3	10.64	0	0						Blank
382	Mannose-6-phosphate	M6P	IC-MS	S23_QC_a_mouse_NA_NA_NA_NA_06_BA3	10.7	0.36437	27784998						Quality Control
383	Mannose-6-phosphate	M6P	IC-MS	S23_QC_a_mouse_NA_NA_NA_NA_23_BA3	10.69	0.34939	22286935						Quality Control
384	Mannose-6-phosphate	M6P	IC-MS	S23_QC_a_mouse_NA_NA_NA_NA_43_BA3	10.7	0.35339	23272931						Quality Control
405	Pentose	PENT	IC-MS	S22_blankIS_a_NA_NA_NA_NA_NA_41_BD3	2.66	0.00031	28134						Blank
406	Pentose	PENT	IC-MS	S23_QC_a_mouse_NA_NA_NA_NA_06_BA3	2.38	0.35542	27102851						Quality Control
407	Pentose	PENT	IC-MS	S23_QC_a_mouse_NA_NA_NA_NA_23_BA3	2.39	0.3923	25023921						Quality Control
408	Pentose	PENT	IC-MS	S23_QC_a_mouse_NA_NA_NA_NA_43_BA3	2.39	0.44696	29435059						Quality Control
429	Pentose-5-phosphate	P5P	IC-MS	S22_blankIS_a_NA_NA_NA_NA_NA_41_BD3	10.98	6e-05	5536						Blank
430	Pentose-5-phosphate	P5P	IC-MS	S23_QC_a_mouse_NA_NA_NA_NA_06_BA3	10.97	2.09307	159609089						Quality Control
431	Pentose-5-phosphate	P5P	IC-MS	S23_QC_a_mouse_NA_NA_NA_NA_23_BA3	10.96	2.22804	142122601						Quality Control
432	Pentose-5-phosphate	P5P	IC-MS	S23_QC_a_mouse_NA_NA_NA_NA_43_BA3	10.95	2.41412	158985263						Quality Control
453	Phosphoenolpyruvate	PEP	IC-MS	S22_blankIS_a_NA_NA_NA_NA_NA_41_BD3	15.14	0.03877	8241989						Blank
454	Phosphoenolpyruvate	PEP	IC-MS	S23_QC_a_mouse_NA_NA_NA_NA_06_BA3	15.16	0.11483	23246154						Quality Control
455	Phosphoenolpyruvate	PEP	IC-MS	S23_QC_a_mouse_NA_NA_NA_NA_23_BA3	15.16	0.07103	13312653						Quality Control
456	Phosphoenolpyruvate	PEP	IC-MS	S23_QC_a_mouse_NA_NA_NA_NA_43_BA3	15.14	0.07583	14587833						Quality Control
477	Pyruvate	PYR	IC-MS	S22_blankIS_a_NA_NA_NA_NA_NA_41_BD3	3.52	0.12115	25755028						Blank
478	Pyruvate	PYR	IC-MS	S23_QC_a_mouse_NA_NA_NA_NA_06_BA3	3.52	1.69553	343241542						Quality Control
479	Pyruvate	PYR	IC-MS	S23_QC_a_mouse_NA_NA_NA_NA_23_BA3	3.52	1.67861	314618163						Quality Control
480	Pyruvate	PYR	IC-MS	S23_QC_a_mouse_NA_NA_NA_NA_43_BA3	3.52	1.63691	314915104						Quality Control
501	Sedoheptulose-7-phosphate	S7P	IC-MS	S22_blankIS_a_NA_NA_NA_NA_NA_41_BD3	0	0	0						Blank
502	Sedoheptulose-7-phosphate	S7P	IC-MS	S23_QC_a_mouse_NA_NA_NA_NA_06_BA3	11.22	0.35528	27091904						Quality Control
503	Sedoheptulose-7-phosphate	S7P	IC-MS	S23_QC_a_mouse_NA_NA_NA_NA_23_BA3	11.22	0.38534	24579876						Quality Control
504	Sedoheptulose-7-phosphate	S7P	IC-MS	S23_QC_a_mouse_NA_NA_NA_NA_43_BA3	11.21	0.37561	24736305						Quality Control
525	Succinate	SUC	IC-MS	S22_blankIS_a_NA_NA_NA_NA_NA_41_BD3	8.99	0.13085	27816187						Blank
526	Succinate	SUC	IC-MS	S23_QC_a_mouse_NA_NA_NA_NA_06_BA3	9	15.9895	3236916522						Quality Control
527	Succinate	SUC	IC-MS	S23_QC_a_mouse_NA_NA_NA_NA_23_BA3	8.99	17.2709	3237049012						Quality Control
528	Succinate	SUC	IC-MS	S23_QC_a_mouse_NA_NA_NA_NA_43_BA3	8.99	17.1652	3302295313						Quality Control

## Sheet: 3 months
targeted metabolomics analysis of 3-months old cerebellum
	Analyte	Abbreviation	TList	Rawfile	RT	Normarea	Totalarea	Genotype	Tissue	Sex	Treatment	Animal	Sampletype
6	(2+3)-Phosphoglycerate	2PG+3PG	IC-MS	S12_sample_a_mouse_cerebellum_NA_wt_702_32_BC1	13.78	0.576	82326928	wt	cerebellum				Unknown
7	(2+3)-Phosphoglycerate	2PG+3PG	IC-MS	S13_sample_a_mouse_cerebellum_NA_wt_712_33_BC2	13.82	0.816	128609264	wt	cerebellum				Unknown
19	(2+3)-Phosphoglycerate	2PG+3PG	IC-MS	S11_sample_a_mouse_cerebellum_NA_wt_688_31_BB8	13.79	0.699	124135280	wt	cerebellum				Unknown
20	(2+3)-Phosphoglycerate	2PG+3PG	IC-MS	S17_sample_a_mouse_cerebellum_NA_ko_683_38_BC6	13.78	1.11	215759744	ko	cerebellum				Unknown
21	(2+3)-Phosphoglycerate	2PG+3PG	IC-MS	S14_sample_a_mouse_cerebellum_NA_wt_760_34_BC3	13.81	0.924	139175696	wt	cerebellum				Unknown
22	(2+3)-Phosphoglycerate	2PG+3PG	IC-MS	S15_sample_a_mouse_cerebellum_NA_wt_761_35_BC4	13.8	0.845	127477032	wt	cerebellum				Unknown
23	(2+3)-Phosphoglycerate	2PG+3PG	IC-MS	S16_sample_a_mouse_cerebellum_NA_ko_673_37_BC5	13.8	1.3	228188640	ko	cerebellum				Unknown
24	(2+3)-Phosphoglycerate	2PG+3PG	IC-MS	S20_sample_a_mouse_cerebellum_NA_ko_704_41_BD1	13.78	1.33	248130960	ko	cerebellum				Unknown
25	(2+3)-Phosphoglycerate	2PG+3PG	IC-MS	S18_sample_a_mouse_cerebellum_NA_ko_691_39_BC7	13.77	1.16	203225824	ko	cerebellum				Unknown
26	(2+3)-Phosphoglycerate	2PG+3PG	IC-MS	S19_sample_a_mouse_cerebellum_NA_ko_703_40_BC8	13.77	0.904	162339248	ko	cerebellum				Unknown
28	6-Phosphogluconate	6PG	IC-MS	S17_sample_a_mouse_cerebellum_NA_ko_683_38_BC6	12.89	0.251	48630136	ko	cerebellum				Unknown
29	6-Phosphogluconate	6PG	IC-MS	S18_sample_a_mouse_cerebellum_NA_ko_691_39_BC7	12.89	0.131	22999160	ko	cerebellum				Unknown
30	6-Phosphogluconate	6PG	IC-MS	S19_sample_a_mouse_cerebellum_NA_ko_703_40_BC8	12.88	0.325	58337364	ko	cerebellum				Unknown
35	6-Phosphogluconate	6PG	IC-MS	S20_sample_a_mouse_cerebellum_NA_ko_704_41_BD1	12.89	0.43	80276544	ko	cerebellum				Unknown
37	6-Phosphogluconate	6PG	IC-MS	S11_sample_a_mouse_cerebellum_NA_wt_688_31_BB8	12.88	0.0272	4829920	wt	cerebellum				Unknown
38	6-Phosphogluconate	6PG	IC-MS	S12_sample_a_mouse_cerebellum_NA_wt_702_32_BC1	12.9	0.016	2287626	wt	cerebellum				Unknown
50	6-Phosphogluconate	6PG	IC-MS	S16_sample_a_mouse_cerebellum_NA_ko_673_37_BC5	12.91	0.583	102350056	ko	cerebellum				Unknown
51	6-Phosphogluconate	6PG	IC-MS	S13_sample_a_mouse_cerebellum_NA_wt_712_33_BC2	12.88	0.0342	5395879	wt	cerebellum				Unknown
52	6-Phosphogluconate	6PG	IC-MS	S15_sample_a_mouse_cerebellum_NA_wt_761_35_BC4	12.9	0.0617	9309598	wt	cerebellum				Unknown
54	6-Phosphogluconate	6PG	IC-MS	S14_sample_a_mouse_cerebellum_NA_wt_760_34_BC3	12.88	0.0274	4129703	wt	cerebellum				Unknown
57	Aconitate	ACN	IC-MS	S11_sample_a_mouse_cerebellum_NA_wt_688_31_BB8	15.54	0.416	73936560	wt	cerebellum				Unknown
61	Aconitate	ACN	IC-MS	S12_sample_a_mouse_cerebellum_NA_wt_702_32_BC1	15.53	0.339	48489256	wt	cerebellum				Unknown
62	Aconitate	ACN	IC-MS	S13_sample_a_mouse_cerebellum_NA_wt_712_33_BC2	15.54	0.376	59225652	wt	cerebellum				Unknown
63	Aconitate	ACN	IC-MS	S19_sample_a_mouse_cerebellum_NA_ko_703_40_BC8	15.53	0.328	58820140	ko	cerebellum				Unknown
64	Aconitate	ACN	IC-MS	S20_sample_a_mouse_cerebellum_NA_ko_704_41_BD1	15.53	0.277	51725200	ko	cerebellum				Unknown
68	Aconitate	ACN	IC-MS	S15_sample_a_mouse_cerebellum_NA_wt_761_35_BC4	15.53	0.472	71102936	wt	cerebellum				Unknown
69	Aconitate	ACN	IC-MS	S16_sample_a_mouse_cerebellum_NA_ko_673_37_BC5	15.55	0.323	56673424	ko	cerebellum				Unknown
70	Aconitate	ACN	IC-MS	S17_sample_a_mouse_cerebellum_NA_ko_683_38_BC6	15.52	0.261	50605324	ko	cerebellum				Unknown
71	Aconitate	ACN	IC-MS	S14_sample_a_mouse_cerebellum_NA_wt_760_34_BC3	15.53	0.321	48331428	wt	cerebellum				Unknown
75	Aconitate	ACN	IC-MS	S18_sample_a_mouse_cerebellum_NA_ko_691_39_BC7	15.53	0.396	69462280	ko	cerebellum				Unknown
82	alpha-Ketoglutarate	KETO	IC-MS	S20_sample_a_mouse_cerebellum_NA_ko_704_41_BD1	10.44	9.79	1827691392	ko	cerebellum				Unknown
84	alpha-Ketoglutarate	KETO	IC-MS	S19_sample_a_mouse_cerebellum_NA_ko_703_40_BC8	10.42	10.6	1911070976	ko	cerebellum				Unknown
91	alpha-Ketoglutarate	KETO	IC-MS	S11_sample_a_mouse_cerebellum_NA_wt_688_31_BB8	10.41	12.4	2208630528	wt	cerebellum				Unknown
92	alpha-Ketoglutarate	KETO	IC-MS	S12_sample_a_mouse_cerebellum_NA_wt_702_32_BC1	10.44	12.8	1824853504	wt	cerebellum				Unknown
93	alpha-Ketoglutarate	KETO	IC-MS	S13_sample_a_mouse_cerebellum_NA_wt_712_33_BC2	10.41	14	2213954304	wt	cerebellum				Unknown
94	alpha-Ketoglutarate	KETO	IC-MS	S18_sample_a_mouse_cerebellum_NA_ko_691_39_BC7	10.41	12.7	2227802880	ko	cerebellum				Unknown
101	alpha-Ketoglutarate	KETO	IC-MS	S16_sample_a_mouse_cerebellum_NA_ko_673_37_BC5	10.42	12.4	2182179584	ko	cerebellum				Unknown
102	alpha-Ketoglutarate	KETO	IC-MS	S17_sample_a_mouse_cerebellum_NA_ko_683_38_BC6	10.45	10	1943191040	ko	cerebellum				Unknown
103	alpha-Ketoglutarate	KETO	IC-MS	S14_sample_a_mouse_cerebellum_NA_wt_760_34_BC3	10.45	14.2	2145437952	wt	cerebellum				Unknown
104	alpha-Ketoglutarate	KETO	IC-MS	S15_sample_a_mouse_cerebellum_NA_wt_761_35_BC4	10.42	15.5	2341946880	wt	cerebellum				Unknown
111	Citrate	CIT	IC-MS	S12_sample_a_mouse_cerebellum_NA_wt_702_32_BC1	14.57	23.4	3352252160	wt	cerebellum				Unknown
122	Citrate	CIT	IC-MS	S13_sample_a_mouse_cerebellum_NA_wt_712_33_BC2	14.59	25.8	4064597504	wt	cerebellum				Unknown
123	Citrate	CIT	IC-MS	S14_sample_a_mouse_cerebellum_NA_wt_760_34_BC3	14.57	19.2	2896200704	wt	cerebellum				Unknown
124	Citrate	CIT	IC-MS	S15_sample_a_mouse_cerebellum_NA_wt_761_35_BC4	14.57	28.3	4268072448	wt	cerebellum				Unknown
125	Citrate	CIT	IC-MS	S16_sample_a_mouse_cerebellum_NA_ko_673_37_BC5	14.56	18.4	3236278784	ko	cerebellum				Unknown
126	Citrate	CIT	IC-MS	S17_sample_a_mouse_cerebellum_NA_ko_683_38_BC6	14.56	14.1	2745076224	ko	cerebellum				Unknown
127	Citrate	CIT	IC-MS	S18_sample_a_mouse_cerebellum_NA_ko_691_39_BC7	14.54	20.5	3599891200	ko	cerebellum				Unknown
128	Citrate	CIT	IC-MS	S19_sample_a_mouse_cerebellum_NA_ko_703_40_BC8	14.56	16.7	2990434048	ko	cerebellum				Unknown
133	Citrate	CIT	IC-MS	S11_sample_a_mouse_cerebellum_NA_wt_688_31_BB8	14.57	25.2	4470048256	wt	cerebellum				Unknown
134	Citrate	CIT	IC-MS	S20_sample_a_mouse_cerebellum_NA_ko_704_41_BD1	14.54	14.2	2654761728	ko	cerebellum				Unknown
140	Fructose-1-phosphate	F1P	IC-MS	S15_sample_a_mouse_cerebellum_NA_wt_761_35_BC4	9.96	0.156	18203800	wt	cerebellum				Unknown
148	Fructose-1-phosphate	F1P	IC-MS	S14_sample_a_mouse_cerebellum_NA_wt_760_34_BC3	9.95	0.127	14439497	wt	cerebellum				Unknown
149	Fructose-1-phosphate	F1P	IC-MS	S19_sample_a_mouse_cerebellum_NA_ko_703_40_BC8	9.95	0.267	34172316	ko	cerebellum				Unknown
150	Fructose-1-phosphate	F1P	IC-MS	S16_sample_a_mouse_cerebellum_NA_ko_673_37_BC5	9.96	0.402	52080252	ko	cerebellum				Unknown
151	Fructose-1-phosphate	F1P	IC-MS	S17_sample_a_mouse_cerebellum_NA_ko_683_38_BC6	9.95	0.245	33918244	ko	cerebellum				Unknown
152	Fructose-1-phosphate	F1P	IC-MS	S18_sample_a_mouse_cerebellum_NA_ko_691_39_BC7	9.97	0.17	22534580	ko	cerebellum				Unknown
154	Fructose-1-phosphate	F1P	IC-MS	S20_sample_a_mouse_cerebellum_NA_ko_704_41_BD1	9.94	0.275	37469036	ko	cerebellum				Unknown
157	Fructose-1-phosphate	F1P	IC-MS	S11_sample_a_mouse_cerebellum_NA_wt_688_31_BB8	9.93	0.118	15029563	wt	cerebellum				Unknown
158	Fructose-1-phosphate	F1P	IC-MS	S12_sample_a_mouse_cerebellum_NA_wt_702_32_BC1	9.97	0.0948	9157066	wt	cerebellum				Unknown
159	Fructose-1-phosphate	F1P	IC-MS	S13_sample_a_mouse_cerebellum_NA_wt_712_33_BC2	9.96	0.12	13751710	wt	cerebellum				Unknown
167	Fructose-1,6-bisphosphate	F16P	IC-MS	S11_sample_a_mouse_cerebellum_NA_wt_688_31_BB8	17.46	0.432	55013272	wt	cerebellum				Unknown
168	Fructose-1,6-bisphosphate	F16P	IC-MS	S12_sample_a_mouse_cerebellum_NA_wt_702_32_BC1	17.47	0.25	24168218	wt	cerebellum				Unknown
175	Fructose-1,6-bisphosphate	F16P	IC-MS	S20_sample_a_mouse_cerebellum_NA_ko_704_41_BD1	17.45	2.83	385750560	ko	cerebellum				Unknown
177	Fructose-1,6-bisphosphate	F16P	IC-MS	S13_sample_a_mouse_cerebellum_NA_wt_712_33_BC2	17.46	0.336	38490888	wt	cerebellum				Unknown
178	Fructose-1,6-bisphosphate	F16P	IC-MS	S14_sample_a_mouse_cerebellum_NA_wt_760_34_BC3	17.48	0.389	44280336	wt	cerebellum				Unknown
179	Fructose-1,6-bisphosphate	F16P	IC-MS	S15_sample_a_mouse_cerebellum_NA_wt_761_35_BC4	17.48	0.674	78626880	wt	cerebellum				Unknown
180	Fructose-1,6-bisphosphate	F16P	IC-MS	S16_sample_a_mouse_cerebellum_NA_ko_673_37_BC5	17.46	5.42	701769600	ko	cerebellum				Unknown
181	Fructose-1,6-bisphosphate	F16P	IC-MS	S17_sample_a_mouse_cerebellum_NA_ko_683_38_BC6	17.46	2.03	281358752	ko	cerebellum				Unknown
182	Fructose-1,6-bisphosphate	F16P	IC-MS	S18_sample_a_mouse_cerebellum_NA_ko_691_39_BC7	17.46	0.964	127993696	ko	cerebellum				Unknown
183	Fructose-1,6-bisphosphate	F16P	IC-MS	S19_sample_a_mouse_cerebellum_NA_ko_703_40_BC8	17.44	1.96	251755552	ko	cerebellum				Unknown
192	Fructose-6-phosphate	F6P	IC-MS	S13_sample_a_mouse_cerebellum_NA_wt_712_33_BC2	10.72	0.0666	7630046	wt	cerebellum				Unknown
194	Fructose-6-phosphate	F6P	IC-MS	S11_sample_a_mouse_cerebellum_NA_wt_688_31_BB8	10.71	0.101	12882779	wt	cerebellum				Unknown
195	Fructose-6-phosphate	F6P	IC-MS	S12_sample_a_mouse_cerebellum_NA_wt_702_32_BC1	10.72	0.0659	6367892	wt	cerebellum				Unknown
196	Fructose-6-phosphate	F6P	IC-MS	S17_sample_a_mouse_cerebellum_NA_ko_683_38_BC6	10.71	0.251	34850984	ko	cerebellum				Unknown
197	Fructose-6-phosphate	F6P	IC-MS	S18_sample_a_mouse_cerebellum_NA_ko_691_39_BC7	10.7	0.185	24545822	ko	cerebellum				Unknown
198	Fructose-6-phosphate	F6P	IC-MS	S19_sample_a_mouse_cerebellum_NA_ko_703_40_BC8	10.7	0.344	44043100	ko	cerebellum				Unknown
199	Fructose-6-phosphate	F6P	IC-MS	S20_sample_a_mouse_cerebellum_NA_ko_704_41_BD1	10.7	0.312	42419044	ko	cerebellum				Unknown
202	Fructose-6-phosphate	F6P	IC-MS	S14_sample_a_mouse_cerebellum_NA_wt_760_34_BC3	10.71	0.0834	9487086	wt	cerebellum				Unknown
203	Fructose-6-phosphate	F6P	IC-MS	S15_sample_a_mouse_cerebellum_NA_wt_761_35_BC4	10.74	0.123	14342813	wt	cerebellum				Unknown
204	Fructose-6-phosphate	F6P	IC-MS	S16_sample_a_mouse_cerebellum_NA_ko_673_37_BC5	10.71	0.729	94411920	ko	cerebellum				Unknown
219	Fumarate	FUM	IC-MS	S17_sample_a_mouse_cerebellum_NA_ko_683_38_BC6	11.23	3.55	689649024	ko	cerebellum				Unknown
222	Fumarate	FUM	IC-MS	S20_sample_a_mouse_cerebellum_NA_ko_704_41_BD1	11.2	3.22	600429888	ko	cerebellum				Unknown
224	Fumarate	FUM	IC-MS	S18_sample_a_mouse_cerebellum_NA_ko_691_39_BC7	11.22	5.5	964782400	ko	cerebellum				Unknown
225	Fumarate	FUM	IC-MS	S19_sample_a_mouse_cerebellum_NA_ko_703_40_BC8	11.23	4.84	868721792	ko	cerebellum				Unknown
235	Fumarate	FUM	IC-MS	S11_sample_a_mouse_cerebellum_NA_wt_688_31_BB8	11.22	6.12	1086230784	wt	cerebellum				Unknown
236	Fumarate	FUM	IC-MS	S12_sample_a_mouse_cerebellum_NA_wt_702_32_BC1	11.23	6.59	942428544	wt	cerebellum				Unknown
237	Fumarate	FUM	IC-MS	S13_sample_a_mouse_cerebellum_NA_wt_712_33_BC2	11.23	7.17	1130727296	wt	cerebellum				Unknown
238	Fumarate	FUM	IC-MS	S14_sample_a_mouse_cerebellum_NA_wt_760_34_BC3	11.24	6.74	1015443328	wt	cerebellum				Unknown
239	Fumarate	FUM	IC-MS	S15_sample_a_mouse_cerebellum_NA_wt_761_35_BC4	11.22	8.79	1325122688	wt	cerebellum				Unknown
240	Fumarate	FUM	IC-MS	S16_sample_a_mouse_cerebellum_NA_ko_673_37_BC5	11.24	4.91	861947520	ko	cerebellum				Unknown
244	Glucose-1-phosphate	G1P	IC-MS	S13_sample_a_mouse_cerebellum_NA_wt_712_33_BC2	7.79	0.89	101933512	wt	cerebellum				Unknown
245	Glucose-1-phosphate	G1P	IC-MS	S14_sample_a_mouse_cerebellum_NA_wt_760_34_BC3	7.82	0.941	107032080	wt	cerebellum				Unknown
246	Glucose-1-phosphate	G1P	IC-MS	S15_sample_a_mouse_cerebellum_NA_wt_761_35_BC4	7.82	0.762	88938192	wt	cerebellum				Unknown
247	Glucose-1-phosphate	G1P	IC-MS	S17_sample_a_mouse_cerebellum_NA_ko_683_38_BC6	7.79	0.636	88107192	ko	cerebellum				Unknown
248	Glucose-1-phosphate	G1P	IC-MS	S18_sample_a_mouse_cerebellum_NA_ko_691_39_BC7	7.82	0.588	78058448	ko	cerebellum				Unknown
249	Glucose-1-phosphate	G1P	IC-MS	S19_sample_a_mouse_cerebellum_NA_ko_703_40_BC8	7.82	0.889	113918496	ko	cerebellum				Unknown
250	Glucose-1-phosphate	G1P	IC-MS	S20_sample_a_mouse_cerebellum_NA_ko_704_41_BD1	7.8	0.835	113609048	ko	cerebellum				Unknown
254	Glucose-1-phosphate	G1P	IC-MS	S12_sample_a_mouse_cerebellum_NA_wt_702_32_BC1	7.78	1.02	98743184	wt	cerebellum				Unknown
258	Glucose-1-phosphate	G1P	IC-MS	S16_sample_a_mouse_cerebellum_NA_ko_673_37_BC5	7.82	1.52	196288768	ko	cerebellum				Unknown
264	Glucose-1-phosphate	G1P	IC-MS	S11_sample_a_mouse_cerebellum_NA_wt_688_31_BB8	7.79	0.799	101849936	wt	cerebellum				Unknown
274	Glucose-6-phosphate	G6P	IC-MS	S20_sample_a_mouse_cerebellum_NA_ko_704_41_BD1	10.45	1.32	179665952	ko	cerebellum				Unknown
278	Glucose-6-phosphate	G6P	IC-MS	S15_sample_a_mouse_cerebellum_NA_wt_761_35_BC4	10.46	0.394	45983420	wt	cerebellum				Unknown
283	Glucose-6-phosphate	G6P	IC-MS	S11_sample_a_mouse_cerebellum_NA_wt_688_31_BB8	10.5	0.388	49384904	wt	cerebellum				Unknown
284	Glucose-6-phosphate	G6P	IC-MS	S12_sample_a_mouse_cerebellum_NA_wt_702_32_BC1	10.48	0.203	19577314	wt	cerebellum				Unknown
288	Glucose-6-phosphate	G6P	IC-MS	S16_sample_a_mouse_cerebellum_NA_ko_673_37_BC5	10.48	4.43	573692096	ko	cerebellum				Unknown
289	Glucose-6-phosphate	G6P	IC-MS	S13_sample_a_mouse_cerebellum_NA_wt_712_33_BC2	10.46	0.213	24457548	wt	cerebellum				Unknown
290	Glucose-6-phosphate	G6P	IC-MS	S14_sample_a_mouse_cerebellum_NA_wt_760_34_BC3	10.45	0.269	30657474	wt	cerebellum				Unknown
291	Glucose-6-phosphate	G6P	IC-MS	S19_sample_a_mouse_cerebellum_NA_ko_703_40_BC8	10.46	1.56	200105200	ko	cerebellum				Unknown
293	Glucose-6-phosphate	G6P	IC-MS	S17_sample_a_mouse_cerebellum_NA_ko_683_38_BC6	10.45	1.11	153579808	ko	cerebellum				Unknown
294	Glucose-6-phosphate	G6P	IC-MS	S18_sample_a_mouse_cerebellum_NA_ko_691_39_BC7	10.43	0.654	86854168	ko	cerebellum				Unknown
309	Hexose	HEX	IC-MS	S20_sample_a_mouse_cerebellum_NA_ko_704_41_BD1	2.87	7.81	1062351808	ko	cerebellum				Unknown
313	Hexose	HEX	IC-MS	S11_sample_a_mouse_cerebellum_NA_wt_688_31_BB8	2.86	8.16	1038959936	wt	cerebellum				Unknown
314	Hexose	HEX	IC-MS	S12_sample_a_mouse_cerebellum_NA_wt_702_32_BC1	2.9	8.52	822872704	wt	cerebellum				Unknown
315	Hexose	HEX	IC-MS	S13_sample_a_mouse_cerebellum_NA_wt_712_33_BC2	2.83	8.43	965622976	wt	cerebellum				Unknown
316	Hexose	HEX	IC-MS	S14_sample_a_mouse_cerebellum_NA_wt_760_34_BC3	2.85	9.6	1091890048	wt	cerebellum				Unknown
317	Hexose	HEX	IC-MS	S15_sample_a_mouse_cerebellum_NA_wt_761_35_BC4	2.87	9.23	1076700672	wt	cerebellum				Unknown
318	Hexose	HEX	IC-MS	S16_sample_a_mouse_cerebellum_NA_ko_673_37_BC5	2.87	8.57	1109099136	ko	cerebellum				Unknown
319	Hexose	HEX	IC-MS	S17_sample_a_mouse_cerebellum_NA_ko_683_38_BC6	2.89	7.39	1023699200	ko	cerebellum				Unknown
320	Hexose	HEX	IC-MS	S18_sample_a_mouse_cerebellum_NA_ko_691_39_BC7	2.87	8.71	1156537984	ko	cerebellum				Unknown
321	Hexose	HEX	IC-MS	S19_sample_a_mouse_cerebellum_NA_ko_703_40_BC8	2.83	8.83	1131290368	ko	cerebellum				Unknown
325	Isocitrate	ICI	IC-MS	S17_sample_a_mouse_cerebellum_NA_ko_683_38_BC6	15.09	0.438	85022632	ko	cerebellum				Unknown
326	Isocitrate	ICI	IC-MS	S18_sample_a_mouse_cerebellum_NA_ko_691_39_BC7	15.07	0.637	111792928	ko	cerebellum				Unknown
327	Isocitrate	ICI	IC-MS	S15_sample_a_mouse_cerebellum_NA_wt_761_35_BC4	15.09	0.863	130095704	wt	cerebellum				Unknown
328	Isocitrate	ICI	IC-MS	S16_sample_a_mouse_cerebellum_NA_ko_673_37_BC5	15.07	0.588	103180144	ko	cerebellum				Unknown
331	Isocitrate	ICI	IC-MS	S19_sample_a_mouse_cerebellum_NA_ko_703_40_BC8	15.06	0.602	107987320	ko	cerebellum				Unknown
332	Isocitrate	ICI	IC-MS	S20_sample_a_mouse_cerebellum_NA_ko_704_41_BD1	15.07	0.427	79699992	ko	cerebellum				Unknown
341	Isocitrate	ICI	IC-MS	S11_sample_a_mouse_cerebellum_NA_wt_688_31_BB8	15.06	0.632	112242304	wt	cerebellum				Unknown
342	Isocitrate	ICI	IC-MS	S12_sample_a_mouse_cerebellum_NA_wt_702_32_BC1	15.07	0.581	83139872	wt	cerebellum				Unknown
347	Isocitrate	ICI	IC-MS	S13_sample_a_mouse_cerebellum_NA_wt_712_33_BC2	15.08	0.823	129709536	wt	cerebellum				Unknown
349	Isocitrate	ICI	IC-MS	S14_sample_a_mouse_cerebellum_NA_wt_760_34_BC3	15.08	0.59	88934464	wt	cerebellum				Unknown
355	Lactate	LAC	IC-MS	S18_sample_a_mouse_cerebellum_NA_ko_691_39_BC7	2.87	202	35464192000	ko	cerebellum				Unknown
360	Lactate	LAC	IC-MS	S19_sample_a_mouse_cerebellum_NA_ko_703_40_BC8	2.87	194	34882621440	ko	cerebellum				Unknown
364	Lactate	LAC	IC-MS	S12_sample_a_mouse_cerebellum_NA_wt_702_32_BC1	2.87	176	25113071616	wt	cerebellum				Unknown
365	Lactate	LAC	IC-MS	S20_sample_a_mouse_cerebellum_NA_ko_704_41_BD1	2.88	176	32815439872	ko	cerebellum				Unknown
366	Lactate	LAC	IC-MS	S14_sample_a_mouse_cerebellum_NA_wt_760_34_BC3	2.87	215	32457580544	wt	cerebellum				Unknown
367	Lactate	LAC	IC-MS	S15_sample_a_mouse_cerebellum_NA_wt_761_35_BC4	2.89	210	31610771456	wt	cerebellum				Unknown
368	Lactate	LAC	IC-MS	S16_sample_a_mouse_cerebellum_NA_ko_673_37_BC5	2.87	193	33848786944	ko	cerebellum				Unknown
369	Lactate	LAC	IC-MS	S13_sample_a_mouse_cerebellum_NA_wt_712_33_BC2	2.85	189	29770037248	wt	cerebellum				Unknown
376	Lactate	LAC	IC-MS	S11_sample_a_mouse_cerebellum_NA_wt_688_31_BB8	2.87	172	30496389120	wt	cerebellum				Unknown
377	Lactate	LAC	IC-MS	S17_sample_a_mouse_cerebellum_NA_ko_683_38_BC6	2.89	168	32618620928	ko	cerebellum				Unknown
387	Malate	MAL	IC-MS	S19_sample_a_mouse_cerebellum_NA_ko_703_40_BC8	9.2	36.4	6532167680	ko	cerebellum				Unknown
388	Malate	MAL	IC-MS	S20_sample_a_mouse_cerebellum_NA_ko_704_41_BD1	9.22	27	5038750208	ko	cerebellum				Unknown
391	Malate	MAL	IC-MS	S12_sample_a_mouse_cerebellum_NA_wt_702_32_BC1	9.24	42.8	6126929920	wt	cerebellum				Unknown
392	Malate	MAL	IC-MS	S13_sample_a_mouse_cerebellum_NA_wt_712_33_BC2	9.23	41.3	6506264576	wt	cerebellum				Unknown
394	Malate	MAL	IC-MS	S11_sample_a_mouse_cerebellum_NA_wt_688_31_BB8	9.21	36	6397620224	wt	cerebellum				Unknown
397	Malate	MAL	IC-MS	S14_sample_a_mouse_cerebellum_NA_wt_760_34_BC3	9.21	40.2	6064618496	wt	cerebellum				Unknown
399	Malate	MAL	IC-MS	S15_sample_a_mouse_cerebellum_NA_wt_761_35_BC4	9.22	50.6	7633976832	wt	cerebellum				Unknown
400	Malate	MAL	IC-MS	S16_sample_a_mouse_cerebellum_NA_ko_673_37_BC5	9.24	34.2	5995364864	ko	cerebellum				Unknown
402	Malate	MAL	IC-MS	S18_sample_a_mouse_cerebellum_NA_ko_691_39_BC7	9.22	39	6846946816	ko	cerebellum				Unknown
404	Malate	MAL	IC-MS	S17_sample_a_mouse_cerebellum_NA_ko_683_38_BC6	9.23	26.6	5153127424	ko	cerebellum				Unknown
406	Mannitol	MAN	IC-MS	S11_sample_a_mouse_cerebellum_NA_wt_688_31_BB8	2.21	0.847	107952832	wt	cerebellum				Unknown
407	Mannitol	MAN	IC-MS	S12_sample_a_mouse_cerebellum_NA_wt_702_32_BC1	2.25	0.869	83904360	wt	cerebellum				Unknown
410	Mannitol	MAN	IC-MS	S15_sample_a_mouse_cerebellum_NA_wt_761_35_BC4	2.25	0.876	102144784	wt	cerebellum				Unknown
412	Mannitol	MAN	IC-MS	S13_sample_a_mouse_cerebellum_NA_wt_712_33_BC2	2.26	0.863	98835408	wt	cerebellum				Unknown
413	Mannitol	MAN	IC-MS	S14_sample_a_mouse_cerebellum_NA_wt_760_34_BC3	2.24	0.933	106193832	wt	cerebellum				Unknown
414	Mannitol	MAN	IC-MS	S20_sample_a_mouse_cerebellum_NA_ko_704_41_BD1	2.25	0.524	71298216	ko	cerebellum				Unknown
423	Mannitol	MAN	IC-MS	S16_sample_a_mouse_cerebellum_NA_ko_673_37_BC5	2.25	0.519	67233664	ko	cerebellum				Unknown
424	Mannitol	MAN	IC-MS	S17_sample_a_mouse_cerebellum_NA_ko_683_38_BC6	2.27	0.51	70701760	ko	cerebellum				Unknown
425	Mannitol	MAN	IC-MS	S18_sample_a_mouse_cerebellum_NA_ko_691_39_BC7	2.23	0.678	90020720	ko	cerebellum				Unknown
426	Mannitol	MAN	IC-MS	S19_sample_a_mouse_cerebellum_NA_ko_703_40_BC8	2.24	0.631	80860392	ko	cerebellum				Unknown
434	Mannitol-1-phosphate	M1P	IC-MS	S14_sample_a_mouse_cerebellum_NA_wt_760_34_BC3	7.8	0.0844	9602440	wt	cerebellum				Unknown
435	Mannitol-1-phosphate	M1P	IC-MS	S15_sample_a_mouse_cerebellum_NA_wt_761_35_BC4	7.8	0.0764	8911325	wt	cerebellum				Unknown
436	Mannitol-1-phosphate	M1P	IC-MS	S16_sample_a_mouse_cerebellum_NA_ko_673_37_BC5	7.8	0.0326	4223687	ko	cerebellum				Unknown
445	Mannitol-1-phosphate	M1P	IC-MS	S17_sample_a_mouse_cerebellum_NA_ko_683_38_BC6	7.79	0.0362	5021597	ko	cerebellum				Unknown
446	Mannitol-1-phosphate	M1P	IC-MS	S18_sample_a_mouse_cerebellum_NA_ko_691_39_BC7	7.78	0.052	6900218	ko	cerebellum				Unknown
447	Mannitol-1-phosphate	M1P	IC-MS	S19_sample_a_mouse_cerebellum_NA_ko_703_40_BC8	7.79	0.0232	2967253	ko	cerebellum				Unknown
450	Mannitol-1-phosphate	M1P	IC-MS	S12_sample_a_mouse_cerebellum_NA_wt_702_32_BC1	7.8	0.0342	3302130	wt	cerebellum				Unknown
452	Mannitol-1-phosphate	M1P	IC-MS	S20_sample_a_mouse_cerebellum_NA_ko_704_41_BD1	7.78	0.0297	4040759	ko	cerebellum				Unknown
455	Mannitol-1-phosphate	M1P	IC-MS	S13_sample_a_mouse_cerebellum_NA_wt_712_33_BC2	7.78	0.0614	7030545	wt	cerebellum				Unknown
456	Mannitol-1-phosphate	M1P	IC-MS	S11_sample_a_mouse_cerebellum_NA_wt_688_31_BB8	7.79	0.0518	6603682	wt	cerebellum				Unknown
460	Mannose-6-phosphate	M6P	IC-MS	S16_sample_a_mouse_cerebellum_NA_ko_673_37_BC5	10.88	0.957	123871312	ko	cerebellum				Unknown
467	Mannose-6-phosphate	M6P	IC-MS	S14_sample_a_mouse_cerebellum_NA_wt_760_34_BC3	10.94	0.177	20111122	wt	cerebellum				Unknown
468	Mannose-6-phosphate	M6P	IC-MS	S15_sample_a_mouse_cerebellum_NA_wt_761_35_BC4	10.91	0.22	25656736	wt	cerebellum				Unknown
469	Mannose-6-phosphate	M6P	IC-MS	S17_sample_a_mouse_cerebellum_NA_ko_683_38_BC6	10.9	0.301	41683144	ko	cerebellum				Unknown
470	Mannose-6-phosphate	M6P	IC-MS	S18_sample_a_mouse_cerebellum_NA_ko_691_39_BC7	10.91	0.288	38231292	ko	cerebellum				Unknown
471	Mannose-6-phosphate	M6P	IC-MS	S19_sample_a_mouse_cerebellum_NA_ko_703_40_BC8	10.89	0.469	60098436	ko	cerebellum				Unknown
472	Mannose-6-phosphate	M6P	IC-MS	S20_sample_a_mouse_cerebellum_NA_ko_704_41_BD1	10.88	0.34	46268168	ko	cerebellum				Unknown
481	Mannose-6-phosphate	M6P	IC-MS	S11_sample_a_mouse_cerebellum_NA_wt_688_31_BB8	10.92	0.207	26328504	wt	cerebellum				Unknown
482	Mannose-6-phosphate	M6P	IC-MS	S12_sample_a_mouse_cerebellum_NA_wt_702_32_BC1	10.96	0.141	13607437	wt	cerebellum				Unknown
483	Mannose-6-phosphate	M6P	IC-MS	S13_sample_a_mouse_cerebellum_NA_wt_712_33_BC2	10.95	0.169	19398914	wt	cerebellum				Unknown
490	Pentose	PENT	IC-MS	S13_sample_a_mouse_cerebellum_NA_wt_712_33_BC2	2.43	0.255	29238762	wt	cerebellum				Unknown
496	Pentose	PENT	IC-MS	S11_sample_a_mouse_cerebellum_NA_wt_688_31_BB8	2.4	0.253	32224868	wt	cerebellum				Unknown
497	Pentose	PENT	IC-MS	S12_sample_a_mouse_cerebellum_NA_wt_702_32_BC1	2.56	0.27	26064610	wt	cerebellum				Unknown
499	Pentose	PENT	IC-MS	S14_sample_a_mouse_cerebellum_NA_wt_760_34_BC3	2.4	0.256	29099676	wt	cerebellum				Unknown
500	Pentose	PENT	IC-MS	S15_sample_a_mouse_cerebellum_NA_wt_761_35_BC4	2.39	0.245	28628652	wt	cerebellum				Unknown
506	Pentose	PENT	IC-MS	S16_sample_a_mouse_cerebellum_NA_ko_673_37_BC5	2.56	0.197	25499310	ko	cerebellum				Unknown
507	Pentose	PENT	IC-MS	S17_sample_a_mouse_cerebellum_NA_ko_683_38_BC6	2.55	0.175	24305726	ko	cerebellum				Unknown
508	Pentose	PENT	IC-MS	S18_sample_a_mouse_cerebellum_NA_ko_691_39_BC7	2.4	0.211	28059562	ko	cerebellum				Unknown
509	Pentose	PENT	IC-MS	S19_sample_a_mouse_cerebellum_NA_ko_703_40_BC8	2.4	0.208	26670984	ko	cerebellum				Unknown
510	Pentose	PENT	IC-MS	S20_sample_a_mouse_cerebellum_NA_ko_704_41_BD1	2.54	0.164	22329500	ko	cerebellum				Unknown
512	Pentose-5-phosphate	P5P	IC-MS	S19_sample_a_mouse_cerebellum_NA_ko_703_40_BC8	11.19	1.35	173624400	ko	cerebellum				Unknown
517	Pentose-5-phosphate	P5P	IC-MS	S20_sample_a_mouse_cerebellum_NA_ko_704_41_BD1	11.21	0.885	120390856	ko	cerebellum				Unknown
527	Pentose-5-phosphate	P5P	IC-MS	S14_sample_a_mouse_cerebellum_NA_wt_760_34_BC3	11.21	1.51	172151968	wt	cerebellum				Unknown
528	Pentose-5-phosphate	P5P	IC-MS	S15_sample_a_mouse_cerebellum_NA_wt_761_35_BC4	11.22	2.2	256046208	wt	cerebellum				Unknown
529	Pentose-5-phosphate	P5P	IC-MS	S16_sample_a_mouse_cerebellum_NA_ko_673_37_BC5	11.23	1.88	243190992	ko	cerebellum				Unknown
531	Pentose-5-phosphate	P5P	IC-MS	S18_sample_a_mouse_cerebellum_NA_ko_691_39_BC7	11.22	1.45	191892688	ko	cerebellum				Unknown
534	Pentose-5-phosphate	P5P	IC-MS	S17_sample_a_mouse_cerebellum_NA_ko_683_38_BC6	11.22	1.07	147999120	ko	cerebellum				Unknown
535	Pentose-5-phosphate	P5P	IC-MS	S12_sample_a_mouse_cerebellum_NA_wt_702_32_BC1	11.23	1.65	159579552	wt	cerebellum				Unknown
536	Pentose-5-phosphate	P5P	IC-MS	S13_sample_a_mouse_cerebellum_NA_wt_712_33_BC2	11.23	1.86	213351248	wt	cerebellum				Unknown
537	Pentose-5-phosphate	P5P	IC-MS	S11_sample_a_mouse_cerebellum_NA_wt_688_31_BB8	11.22	2.16	275551232	wt	cerebellum				Unknown
541	Phosphoenolpyruvate	PEP	IC-MS	S13_sample_a_mouse_cerebellum_NA_wt_712_33_BC2	15.52	0.208	32781630	wt	cerebellum				Unknown
542	Phosphoenolpyruvate	PEP	IC-MS	S14_sample_a_mouse_cerebellum_NA_wt_760_34_BC3	15.53	0.238	35923260	wt	cerebellum				Unknown
543	Phosphoenolpyruvate	PEP	IC-MS	S15_sample_a_mouse_cerebellum_NA_wt_761_35_BC4	15.53	0.209	31562656	wt	cerebellum				Unknown
548	Phosphoenolpyruvate	PEP	IC-MS	S11_sample_a_mouse_cerebellum_NA_wt_688_31_BB8	15.53	0.165	29384894	wt	cerebellum				Unknown
549	Phosphoenolpyruvate	PEP	IC-MS	S12_sample_a_mouse_cerebellum_NA_wt_702_32_BC1	15.53	0.156	22266130	wt	cerebellum				Unknown
553	Phosphoenolpyruvate	PEP	IC-MS	S16_sample_a_mouse_cerebellum_NA_ko_673_37_BC5	15.52	0.233	40910168	ko	cerebellum				Unknown
559	Phosphoenolpyruvate	PEP	IC-MS	S17_sample_a_mouse_cerebellum_NA_ko_683_38_BC6	15.51	0.248	48022340	ko	cerebellum				Unknown
560	Phosphoenolpyruvate	PEP	IC-MS	S18_sample_a_mouse_cerebellum_NA_ko_691_39_BC7	15.5	0.212	37120736	ko	cerebellum				Unknown
562	Phosphoenolpyruvate	PEP	IC-MS	S19_sample_a_mouse_cerebellum_NA_ko_703_40_BC8	15.5	0.16	28744188	ko	cerebellum				Unknown
563	Phosphoenolpyruvate	PEP	IC-MS	S20_sample_a_mouse_cerebellum_NA_ko_704_41_BD1	15.51	0.295	55078848	ko	cerebellum				Unknown
576	Pyruvate	PYR	IC-MS	S20_sample_a_mouse_cerebellum_NA_ko_704_41_BD1	3.61	2.83	528299552	ko	cerebellum				Unknown
577	Pyruvate	PYR	IC-MS	S12_sample_a_mouse_cerebellum_NA_wt_702_32_BC1	3.63	1.63	233159616	wt	cerebellum				Unknown
578	Pyruvate	PYR	IC-MS	S13_sample_a_mouse_cerebellum_NA_wt_712_33_BC2	3.62	2.19	345707712	wt	cerebellum				Unknown
581	Pyruvate	PYR	IC-MS	S16_sample_a_mouse_cerebellum_NA_ko_673_37_BC5	3.63	3.44	603195008	ko	cerebellum				Unknown
583	Pyruvate	PYR	IC-MS	S14_sample_a_mouse_cerebellum_NA_wt_760_34_BC3	3.64	2.08	313546560	wt	cerebellum				Unknown
584	Pyruvate	PYR	IC-MS	S15_sample_a_mouse_cerebellum_NA_wt_761_35_BC4	3.63	2.2	331505056	wt	cerebellum				Unknown
585	Pyruvate	PYR	IC-MS	S11_sample_a_mouse_cerebellum_NA_wt_688_31_BB8	3.64	1.54	273752832	wt	cerebellum				Unknown
588	Pyruvate	PYR	IC-MS	S19_sample_a_mouse_cerebellum_NA_ko_703_40_BC8	3.62	2.59	465151104	ko	cerebellum				Unknown
589	Pyruvate	PYR	IC-MS	S17_sample_a_mouse_cerebellum_NA_ko_683_38_BC6	3.62	2.5	484284576	ko	cerebellum				Unknown
591	Pyruvate	PYR	IC-MS	S18_sample_a_mouse_cerebellum_NA_ko_691_39_BC7	3.63	2.44	427595552	ko	cerebellum				Unknown
593	Sedoheptulose-7-phosphate	S7P	IC-MS	S16_sample_a_mouse_cerebellum_NA_ko_673_37_BC5	11.45	0.315	40836516	ko	cerebellum				Unknown
596	Sedoheptulose-7-phosphate	S7P	IC-MS	S17_sample_a_mouse_cerebellum_NA_ko_683_38_BC6	11.45	0.177	24500652	ko	cerebellum				Unknown
601	Sedoheptulose-7-phosphate	S7P	IC-MS	S15_sample_a_mouse_cerebellum_NA_wt_761_35_BC4	11.45	0.353	41227356	wt	cerebellum				Unknown
604	Sedoheptulose-7-phosphate	S7P	IC-MS	S18_sample_a_mouse_cerebellum_NA_ko_691_39_BC7	11.45	0.278	36970396	ko	cerebellum				Unknown
605	Sedoheptulose-7-phosphate	S7P	IC-MS	S19_sample_a_mouse_cerebellum_NA_ko_703_40_BC8	11.45	0.268	34397752	ko	cerebellum				Unknown
606	Sedoheptulose-7-phosphate	S7P	IC-MS	S20_sample_a_mouse_cerebellum_NA_ko_704_41_BD1	11.45	0.194	26433094	ko	cerebellum				Unknown
612	Sedoheptulose-7-phosphate	S7P	IC-MS	S13_sample_a_mouse_cerebellum_NA_wt_712_33_BC2	11.45	0.347	39785908	wt	cerebellum				Unknown
613	Sedoheptulose-7-phosphate	S7P	IC-MS	S14_sample_a_mouse_cerebellum_NA_wt_760_34_BC3	11.46	0.331	37648628	wt	cerebellum				Unknown
615	Sedoheptulose-7-phosphate	S7P	IC-MS	S11_sample_a_mouse_cerebellum_NA_wt_688_31_BB8	11.48	0.444	56601580	wt	cerebellum				Unknown
617	Sedoheptulose-7-phosphate	S7P	IC-MS	S12_sample_a_mouse_cerebellum_NA_wt_702_32_BC1	11.45	0.293	28295276	wt	cerebellum				Unknown
628	Succinate	SUC	IC-MS	S13_sample_a_mouse_cerebellum_NA_wt_712_33_BC2	9.18	28.9	4553033216	wt	cerebellum				Unknown
631	Succinate	SUC	IC-MS	S12_sample_a_mouse_cerebellum_NA_wt_702_32_BC1	9.21	30.2	4325306368	wt	cerebellum				Unknown
632	Succinate	SUC	IC-MS	S17_sample_a_mouse_cerebellum_NA_ko_683_38_BC6	9.17	20.4	3962249728	ko	cerebellum				Unknown
633	Succinate	SUC	IC-MS	S14_sample_a_mouse_cerebellum_NA_wt_760_34_BC3	9.2	40.8	6155561984	wt	cerebellum				Unknown
634	Succinate	SUC	IC-MS	S15_sample_a_mouse_cerebellum_NA_wt_761_35_BC4	9.19	27.1	4082893568	wt	cerebellum				Unknown
635	Succinate	SUC	IC-MS	S16_sample_a_mouse_cerebellum_NA_ko_673_37_BC5	9.17	17.7	3113916416	ko	cerebellum				Unknown
640	Succinate	SUC	IC-MS	S20_sample_a_mouse_cerebellum_NA_ko_704_41_BD1	9.16	20.1	3761455616	ko	cerebellum				Unknown
642	Succinate	SUC	IC-MS	S11_sample_a_mouse_cerebellum_NA_wt_688_31_BB8	9.2	20.1	3567095808	wt	cerebellum				Unknown
643	Succinate	SUC	IC-MS	S18_sample_a_mouse_cerebellum_NA_ko_691_39_BC7	9.18	22.8	3995931136	ko	cerebellum				Unknown
644	Succinate	SUC	IC-MS	S19_sample_a_mouse_cerebellum_NA_ko_703_40_BC8	9.2	22.5	4040429824	ko	cerebellum				Unknown
1	(2+3)-Phosphoglycerate	2PG+3PG	IC-MS	S22_blank.is_a_NA_NA_NA_NA_NA_11_BA5	13.8	0.000737	33929						Blank
2	(2+3)-Phosphoglycerate	2PG+3PG	IC-MS	S23_QC_a_mouse_NA_NA_NA_1_45_BA3	13.77	0.683	131178864						Quality Control
3	(2+3)-Phosphoglycerate	2PG+3PG	IC-MS	S24_QC_a_mouse_NA_NA_NA_2_08_BD2	13.81	0.522	105019488						Quality Control
4	(2+3)-Phosphoglycerate	2PG+3PG	IC-MS	S24_QC_a_mouse_NA_NA_NA_2_29_BD2	13.79	0.626	108986312						Quality Control
5	(2+3)-Phosphoglycerate	2PG+3PG	IC-MS	S24_QC_a_mouse_NA_NA_NA_2_47_BD2	13.77	0.662	121454928						Quality Control
13	(2+3)-Phosphoglycerate	2PG+3PG	IC-MS	S23_QC_a_mouse_NA_NA_NA_1_06_BA3	13.79	0.606	119006200						Quality Control
14	(2+3)-Phosphoglycerate	2PG+3PG	IC-MS	S23_QC_a_mouse_NA_NA_NA_1_27_BA3	13.8	0.634	122684800						Quality Control
32	6-Phosphogluconate	6PG	IC-MS	S23_QC_a_mouse_NA_NA_NA_1_06_BA3	12.89	0.0505	9924390						Quality Control
40	6-Phosphogluconate	6PG	IC-MS	S22_blank.is_a_NA_NA_NA_NA_NA_11_BA5	12.9	0	0						Blank
45	6-Phosphogluconate	6PG	IC-MS	S24_QC_a_mouse_NA_NA_NA_2_29_BD2	12.89	0.0504	8767175						Quality Control
46	6-Phosphogluconate	6PG	IC-MS	S23_QC_a_mouse_NA_NA_NA_1_27_BA3	12.89	0.0565	10937881						Quality Control
47	6-Phosphogluconate	6PG	IC-MS	S23_QC_a_mouse_NA_NA_NA_1_45_BA3	12.87	0.066	12676697						Quality Control
48	6-Phosphogluconate	6PG	IC-MS	S24_QC_a_mouse_NA_NA_NA_2_08_BD2	12.87	0.0484	9743795						Quality Control
49	6-Phosphogluconate	6PG	IC-MS	S24_QC_a_mouse_NA_NA_NA_2_47_BD2	12.87	0.061	11197902						Quality Control
56	Aconitate	ACN	IC-MS	S22_blank.is_a_NA_NA_NA_NA_NA_11_BA5	15.54	0.00212	97496						Blank
67	Aconitate	ACN	IC-MS	S24_QC_a_mouse_NA_NA_NA_2_47_BD2	15.52	0.342	62735488						Quality Control
72	Aconitate	ACN	IC-MS	S23_QC_a_mouse_NA_NA_NA_1_06_BA3	15.52	0.33	64791084						Quality Control
77	Aconitate	ACN	IC-MS	S24_QC_a_mouse_NA_NA_NA_2_29_BD2	15.54	0.398	69234800						Quality Control
78	Aconitate	ACN	IC-MS	S23_QC_a_mouse_NA_NA_NA_1_27_BA3	15.54	0.415	80297224						Quality Control
80	Aconitate	ACN	IC-MS	S24_QC_a_mouse_NA_NA_NA_2_08_BD2	15.54	0.317	63739296						Quality Control
81	Aconitate	ACN	IC-MS	S23_QC_a_mouse_NA_NA_NA_1_45_BA3	15.51	0.403	77390480						Quality Control
87	alpha-Ketoglutarate	KETO	IC-MS	S23_QC_a_mouse_NA_NA_NA_1_27_BA3	10.42	8.6	1664393088						Quality Control
95	alpha-Ketoglutarate	KETO	IC-MS	S22_blank.is_a_NA_NA_NA_NA_NA_11_BA5	10.66	0.00184	84771						Blank
97	alpha-Ketoglutarate	KETO	IC-MS	S23_QC_a_mouse_NA_NA_NA_1_45_BA3	10.44	9.45	1816677376						Quality Control
98	alpha-Ketoglutarate	KETO	IC-MS	S24_QC_a_mouse_NA_NA_NA_2_08_BD2	10.42	7.75	1560372608						Quality Control
99	alpha-Ketoglutarate	KETO	IC-MS	S24_QC_a_mouse_NA_NA_NA_2_29_BD2	10.42	9.08	1580365440						Quality Control
100	alpha-Ketoglutarate	KETO	IC-MS	S24_QC_a_mouse_NA_NA_NA_2_47_BD2	10.45	9.69	1779453568						Quality Control
106	alpha-Ketoglutarate	KETO	IC-MS	S23_QC_a_mouse_NA_NA_NA_1_06_BA3	10.46	8.31	1633175040						Quality Control
113	Citrate	CIT	IC-MS	S23_QC_a_mouse_NA_NA_NA_1_06_BA3	14.54	20	3928702208						Quality Control
117	Citrate	CIT	IC-MS	S24_QC_a_mouse_NA_NA_NA_2_29_BD2	14.57	21.9	3810249216						Quality Control
118	Citrate	CIT	IC-MS	S23_QC_a_mouse_NA_NA_NA_1_27_BA3	14.57	21.3	4129236736						Quality Control
119	Citrate	CIT	IC-MS	S23_QC_a_mouse_NA_NA_NA_1_45_BA3	14.55	20.4	3924252160						Quality Control
120	Citrate	CIT	IC-MS	S24_QC_a_mouse_NA_NA_NA_2_08_BD2	14.58	18.8	3791080192						Quality Control
121	Citrate	CIT	IC-MS	S22_blank.is_a_NA_NA_NA_NA_NA_11_BA5	14.57	0.0231	1064266						Blank
130	Citrate	CIT	IC-MS	S24_QC_a_mouse_NA_NA_NA_2_47_BD2	14.55	21.7	3984038656						Quality Control
136	Fructose-1-phosphate	F1P	IC-MS	S23_QC_a_mouse_NA_NA_NA_1_06_BA3	9.96	0.176	20566870						Quality Control
137	Fructose-1-phosphate	F1P	IC-MS	S23_QC_a_mouse_NA_NA_NA_1_27_BA3	9.96	0.194	22138160						Quality Control
138	Fructose-1-phosphate	F1P	IC-MS	S23_QC_a_mouse_NA_NA_NA_1_45_BA3	9.92	0.179	21518366						Quality Control
142	Fructose-1-phosphate	F1P	IC-MS	S24_QC_a_mouse_NA_NA_NA_2_08_BD2	9.96	0.221	22073620						Quality Control
145	Fructose-1-phosphate	F1P	IC-MS	S24_QC_a_mouse_NA_NA_NA_2_29_BD2	9.96	0.203	19666256						Quality Control
147	Fructose-1-phosphate	F1P	IC-MS	S22_blank.is_a_NA_NA_NA_NA_NA_11_BA5	10.02	2.74e-05	2607						Blank
155	Fructose-1-phosphate	F1P	IC-MS	S24_QC_a_mouse_NA_NA_NA_2_47_BD2	9.94	0.208	22501196						Quality Control
164	Fructose-1,6-bisphosphate	F16P	IC-MS	S24_QC_a_mouse_NA_NA_NA_2_47_BD2	17.45	0.492	53114016						Quality Control
165	Fructose-1,6-bisphosphate	F16P	IC-MS	S24_QC_a_mouse_NA_NA_NA_2_29_BD2	17.46	0.613	59293456						Quality Control
166	Fructose-1,6-bisphosphate	F16P	IC-MS	S22_blank.is_a_NA_NA_NA_NA_NA_11_BA5	17.42	3.63e-05	3456						Blank
171	Fructose-1,6-bisphosphate	F16P	IC-MS	S23_QC_a_mouse_NA_NA_NA_1_06_BA3	17.45	0.506	59281724						Quality Control
172	Fructose-1,6-bisphosphate	F16P	IC-MS	S23_QC_a_mouse_NA_NA_NA_1_27_BA3	17.46	0.546	62306808						Quality Control
173	Fructose-1,6-bisphosphate	F16P	IC-MS	S23_QC_a_mouse_NA_NA_NA_1_45_BA3	17.45	0.586	70418576						Quality Control
174	Fructose-1,6-bisphosphate	F16P	IC-MS	S24_QC_a_mouse_NA_NA_NA_2_08_BD2	17.45	0.613	61168320						Quality Control
191	Fructose-6-phosphate	F6P	IC-MS	S22_blank.is_a_NA_NA_NA_NA_NA_11_BA5	10.73	7.09e-05	6747						Blank
200	Fructose-6-phosphate	F6P	IC-MS	S24_QC_a_mouse_NA_NA_NA_2_29_BD2	10.71	0.116	11201902						Quality Control
201	Fructose-6-phosphate	F6P	IC-MS	S24_QC_a_mouse_NA_NA_NA_2_47_BD2	10.67	0.0981	10596998						Quality Control
205	Fructose-6-phosphate	F6P	IC-MS	S23_QC_a_mouse_NA_NA_NA_1_06_BA3	10.7	0.0731	8561382						Quality Control
206	Fructose-6-phosphate	F6P	IC-MS	S23_QC_a_mouse_NA_NA_NA_1_27_BA3	10.71	0.104	11810130						Quality Control
207	Fructose-6-phosphate	F6P	IC-MS	S23_QC_a_mouse_NA_NA_NA_1_45_BA3	10.69	0.112	13453216						Quality Control
208	Fructose-6-phosphate	F6P	IC-MS	S24_QC_a_mouse_NA_NA_NA_2_08_BD2	10.71	0.107	10680066						Quality Control
218	Fumarate	FUM	IC-MS	S22_blank.is_a_NA_NA_NA_NA_NA_11_BA5	11.21	0.00201	92622						Blank
223	Fumarate	FUM	IC-MS	S24_QC_a_mouse_NA_NA_NA_2_29_BD2	11.21	5.06	881421632						Quality Control
230	Fumarate	FUM	IC-MS	S23_QC_a_mouse_NA_NA_NA_1_45_BA3	11.19	4.73	908376384						Quality Control
231	Fumarate	FUM	IC-MS	S24_QC_a_mouse_NA_NA_NA_2_08_BD2	11.23	4.36	877675904						Quality Control
241	Fumarate	FUM	IC-MS	S23_QC_a_mouse_NA_NA_NA_1_06_BA3	11.23	4.43	871352064						Quality Control
242	Fumarate	FUM	IC-MS	S23_QC_a_mouse_NA_NA_NA_1_27_BA3	11.22	4.75	919040320						Quality Control
243	Fumarate	FUM	IC-MS	S24_QC_a_mouse_NA_NA_NA_2_47_BD2	11.22	4.51	827571072						Quality Control
255	Glucose-1-phosphate	G1P	IC-MS	S22_blank.is_a_NA_NA_NA_NA_NA_11_BA5	7.84	3.49e-05	3324						Blank
260	Glucose-1-phosphate	G1P	IC-MS	S24_QC_a_mouse_NA_NA_NA_2_29_BD2	7.8	1.03	100069888						Quality Control
263	Glucose-1-phosphate	G1P	IC-MS	S24_QC_a_mouse_NA_NA_NA_2_08_BD2	7.81	0.997	99517664						Quality Control
265	Glucose-1-phosphate	G1P	IC-MS	S24_QC_a_mouse_NA_NA_NA_2_47_BD2	7.8	0.982	106110088						Quality Control
268	Glucose-1-phosphate	G1P	IC-MS	S23_QC_a_mouse_NA_NA_NA_1_06_BA3	7.79	0.917	107406096						Quality Control
269	Glucose-1-phosphate	G1P	IC-MS	S23_QC_a_mouse_NA_NA_NA_1_27_BA3	7.8	0.963	109892184						Quality Control
270	Glucose-1-phosphate	G1P	IC-MS	S23_QC_a_mouse_NA_NA_NA_1_45_BA3	7.78	1.07	129057536						Quality Control
273	Glucose-6-phosphate	G6P	IC-MS	S24_QC_a_mouse_NA_NA_NA_2_47_BD2	10.45	0.555	59914072						Quality Control
282	Glucose-6-phosphate	G6P	IC-MS	S22_blank.is_a_NA_NA_NA_NA_NA_11_BA5	10.43	0.000259	24632						Blank
287	Glucose-6-phosphate	G6P	IC-MS	S23_QC_a_mouse_NA_NA_NA_1_06_BA3	10.46	0.549	64284600						Quality Control
292	Glucose-6-phosphate	G6P	IC-MS	S24_QC_a_mouse_NA_NA_NA_2_29_BD2	10.47	0.555	53700668						Quality Control
295	Glucose-6-phosphate	G6P	IC-MS	S24_QC_a_mouse_NA_NA_NA_2_08_BD2	10.48	0.545	54369480						Quality Control
296	Glucose-6-phosphate	G6P	IC-MS	S23_QC_a_mouse_NA_NA_NA_1_27_BA3	10.47	0.584	66649952						Quality Control
297	Glucose-6-phosphate	G6P	IC-MS	S23_QC_a_mouse_NA_NA_NA_1_45_BA3	10.44	0.582	69915608						Quality Control
300	Hexose	HEX	IC-MS	S22_blank.is_a_NA_NA_NA_NA_NA_11_BA5	2.84	0.0295	2811982						Blank
301	Hexose	HEX	IC-MS	S23_QC_a_mouse_NA_NA_NA_1_06_BA3	2.86	7.39	865334336						Quality Control
302	Hexose	HEX	IC-MS	S23_QC_a_mouse_NA_NA_NA_1_27_BA3	2.88	7.28	830729088						Quality Control
303	Hexose	HEX	IC-MS	S23_QC_a_mouse_NA_NA_NA_1_45_BA3	2.84	6.8	817165056						Quality Control
304	Hexose	HEX	IC-MS	S24_QC_a_mouse_NA_NA_NA_2_08_BD2	2.84	7.92	790466752						Quality Control
305	Hexose	HEX	IC-MS	S24_QC_a_mouse_NA_NA_NA_2_29_BD2	2.88	8.02	776017152						Quality Control
306	Hexose	HEX	IC-MS	S24_QC_a_mouse_NA_NA_NA_2_47_BD2	2.86	7.27	785864192						Quality Control
333	Isocitrate	ICI	IC-MS	S23_QC_a_mouse_NA_NA_NA_1_06_BA3	15.08	0.554	108814088						Quality Control
334	Isocitrate	ICI	IC-MS	S23_QC_a_mouse_NA_NA_NA_1_27_BA3	15.08	0.545	105354400						Quality Control
335	Isocitrate	ICI	IC-MS	S22_blank.is_a_NA_NA_NA_NA_NA_11_BA5	15.04	0.00307	141383						Blank
336	Isocitrate	ICI	IC-MS	S24_QC_a_mouse_NA_NA_NA_2_47_BD2	15.07	0.559	102573992						Quality Control
346	Isocitrate	ICI	IC-MS	S24_QC_a_mouse_NA_NA_NA_2_29_BD2	15.08	0.58	101024072						Quality Control
350	Isocitrate	ICI	IC-MS	S24_QC_a_mouse_NA_NA_NA_2_08_BD2	15.08	0.588	118285000						Quality Control
351	Lactate	LAC	IC-MS	S23_QC_a_mouse_NA_NA_NA_1_27_BA3	2.84	147	28503402496						Quality Control
352	Lactate	LAC	IC-MS	S23_QC_a_mouse_NA_NA_NA_1_45_BA3	2.84	148	28466827264						Quality Control
354	Lactate	LAC	IC-MS	S24_QC_a_mouse_NA_NA_NA_2_47_BD2	2.84	150	27565402112						Quality Control
356	Lactate	LAC	IC-MS	S24_QC_a_mouse_NA_NA_NA_2_08_BD2	2.84	130	26180366336						Quality Control
361	Lactate	LAC	IC-MS	S24_QC_a_mouse_NA_NA_NA_2_29_BD2	2.88	153	26587213824						Quality Control
362	Lactate	LAC	IC-MS	S23_QC_a_mouse_NA_NA_NA_1_06_BA3	2.86	142	27952963584						Quality Control
363	Lactate	LAC	IC-MS	S22_blank.is_a_NA_NA_NA_NA_NA_11_BA5	2.84	23.2	1065032064						Blank
378	Malate	MAL	IC-MS	S24_QC_a_mouse_NA_NA_NA_2_29_BD2	9.23	32.6	5673615872						Quality Control
379	Malate	MAL	IC-MS	S24_QC_a_mouse_NA_NA_NA_2_08_BD2	9.21	30.7	6173987328						Quality Control
383	Malate	MAL	IC-MS	S23_QC_a_mouse_NA_NA_NA_1_27_BA3	9.25	31.4	6078723072						Quality Control
384	Malate	MAL	IC-MS	S23_QC_a_mouse_NA_NA_NA_1_45_BA3	9.21	30.5	5860075008						Quality Control
386	Malate	MAL	IC-MS	S23_QC_a_mouse_NA_NA_NA_1_06_BA3	9.22	32.8	6446029824						Quality Control
390	Malate	MAL	IC-MS	S22_blank.is_a_NA_NA_NA_NA_NA_11_BA5	9.21	0.043	1979327						Blank
395	Malate	MAL	IC-MS	S24_QC_a_mouse_NA_NA_NA_2_47_BD2	9.21	30.3	5566398976						Quality Control
408	Mannitol	MAN	IC-MS	S22_blank.is_a_NA_NA_NA_NA_NA_11_BA5	2.26	0.0153	1454437						Blank
419	Mannitol	MAN	IC-MS	S23_QC_a_mouse_NA_NA_NA_1_06_BA3	2.23	0.842	98631992						Quality Control
420	Mannitol	MAN	IC-MS	S23_QC_a_mouse_NA_NA_NA_1_27_BA3	2.26	0.834	95128648						Quality Control
421	Mannitol	MAN	IC-MS	S23_QC_a_mouse_NA_NA_NA_1_45_BA3	2.24	0.842	101068032						Quality Control
422	Mannitol	MAN	IC-MS	S24_QC_a_mouse_NA_NA_NA_2_08_BD2	2.23	0.979	97657888						Quality Control
428	Mannitol	MAN	IC-MS	S24_QC_a_mouse_NA_NA_NA_2_47_BD2	2.22	0.88	95037464						Quality Control
442	Mannitol-1-phosphate	M1P	IC-MS	S23_QC_a_mouse_NA_NA_NA_1_27_BA3	7.8	0.0308	3514861						Quality Control
443	Mannitol-1-phosphate	M1P	IC-MS	S23_QC_a_mouse_NA_NA_NA_1_45_BA3	7.78	0.0318	3818865						Quality Control
444	Mannitol-1-phosphate	M1P	IC-MS	S24_QC_a_mouse_NA_NA_NA_2_08_BD2	7.81	0.0243	2426069						Quality Control
448	Mannitol-1-phosphate	M1P	IC-MS	S24_QC_a_mouse_NA_NA_NA_2_29_BD2	7.8	0.0255	2470053						Quality Control
449	Mannitol-1-phosphate	M1P	IC-MS	S23_QC_a_mouse_NA_NA_NA_1_06_BA3	7.79	0.0213	2499860						Quality Control
454	Mannitol-1-phosphate	M1P	IC-MS	S24_QC_a_mouse_NA_NA_NA_2_47_BD2	7.78	0.028	3029531						Quality Control
459	Mannose-6-phosphate	M6P	IC-MS	S22_blank.is_a_NA_NA_NA_NA_NA_11_BA5	10.95	0	0						Blank
466	Mannose-6-phosphate	M6P	IC-MS	S24_QC_a_mouse_NA_NA_NA_2_47_BD2	10.93	0.22	23719524						Quality Control
473	Mannose-6-phosphate	M6P	IC-MS	S23_QC_a_mouse_NA_NA_NA_1_45_BA3	10.89	0.238	28566198						Quality Control
475	Mannose-6-phosphate	M6P	IC-MS	S23_QC_a_mouse_NA_NA_NA_1_06_BA3	10.92	0.176	20647420						Quality Control
476	Mannose-6-phosphate	M6P	IC-MS	S23_QC_a_mouse_NA_NA_NA_1_27_BA3	10.93	0.232	26448302						Quality Control
478	Mannose-6-phosphate	M6P	IC-MS	S24_QC_a_mouse_NA_NA_NA_2_08_BD2	10.9	0.206	20557478						Quality Control
479	Mannose-6-phosphate	M6P	IC-MS	S24_QC_a_mouse_NA_NA_NA_2_29_BD2	10.95	0.206	19938882						Quality Control
485	Pentose	PENT	IC-MS	S23_QC_a_mouse_NA_NA_NA_1_45_BA3	2.42	0.231	27748562						Quality Control
486	Pentose	PENT	IC-MS	S22_blank.is_a_NA_NA_NA_NA_NA_11_BA5	2.69	0.00693	659382						Blank
487	Pentose	PENT	IC-MS	S24_QC_a_mouse_NA_NA_NA_2_08_BD2	2.54	0.243	24276322						Quality Control
488	Pentose	PENT	IC-MS	S23_QC_a_mouse_NA_NA_NA_1_27_BA3	2.42	0.244	27798638						Quality Control
489	Pentose	PENT	IC-MS	S24_QC_a_mouse_NA_NA_NA_2_47_BD2	2.4	0.26	28057714						Quality Control
492	Pentose	PENT	IC-MS	S24_QC_a_mouse_NA_NA_NA_2_29_BD2	2.42	0.27	26130658						Quality Control
493	Pentose	PENT	IC-MS	S23_QC_a_mouse_NA_NA_NA_1_06_BA3	2.53	0.216	25299358						Quality Control
511	Pentose-5-phosphate	P5P	IC-MS	S22_blank.is_a_NA_NA_NA_NA_NA_11_BA5	11.27	6.52e-05	6211						Blank
513	Pentose-5-phosphate	P5P	IC-MS	S23_QC_a_mouse_NA_NA_NA_1_06_BA3	11.23	1.22	143072160						Quality Control
523	Pentose-5-phosphate	P5P	IC-MS	S23_QC_a_mouse_NA_NA_NA_1_45_BA3	11.19	1.4	167734752						Quality Control
524	Pentose-5-phosphate	P5P	IC-MS	S24_QC_a_mouse_NA_NA_NA_2_08_BD2	11.23	1.35	134427344						Quality Control
525	Pentose-5-phosphate	P5P	IC-MS	S24_QC_a_mouse_NA_NA_NA_2_29_BD2	11.21	1.58	153286528						Quality Control
526	Pentose-5-phosphate	P5P	IC-MS	S23_QC_a_mouse_NA_NA_NA_1_27_BA3	11.22	1.57	178558800						Quality Control
530	Pentose-5-phosphate	P5P	IC-MS	S24_QC_a_mouse_NA_NA_NA_2_47_BD2	11.22	1.26	135966752						Quality Control
544	Phosphoenolpyruvate	PEP	IC-MS	S24_QC_a_mouse_NA_NA_NA_2_47_BD2	15.49	0.163	29982806						Quality Control
550	Phosphoenolpyruvate	PEP	IC-MS	S22_blank.is_a_NA_NA_NA_NA_NA_11_BA5	15.5	0.0529	2432988						Blank
555	Phosphoenolpyruvate	PEP	IC-MS	S23_QC_a_mouse_NA_NA_NA_1_27_BA3	15.52	0.193	37346072						Quality Control
556	Phosphoenolpyruvate	PEP	IC-MS	S23_QC_a_mouse_NA_NA_NA_1_45_BA3	15.49	0.194	37338772						Quality Control
558	Phosphoenolpyruvate	PEP	IC-MS	S23_QC_a_mouse_NA_NA_NA_1_06_BA3	15.52	0.161	31658082						Quality Control
561	Phosphoenolpyruvate	PEP	IC-MS	S24_QC_a_mouse_NA_NA_NA_2_29_BD2	15.52	0.2	34816212						Quality Control
564	Phosphoenolpyruvate	PEP	IC-MS	S24_QC_a_mouse_NA_NA_NA_2_08_BD2	15.52	0.165	33159410						Quality Control
565	Pyruvate	PYR	IC-MS	S23_QC_a_mouse_NA_NA_NA_1_27_BA3	3.63	1.51	291477376						Quality Control
566	Pyruvate	PYR	IC-MS	S23_QC_a_mouse_NA_NA_NA_1_45_BA3	3.63	1.66	319290496						Quality Control
567	Pyruvate	PYR	IC-MS	S23_QC_a_mouse_NA_NA_NA_1_06_BA3	3.63	1.35	266206992						Quality Control
573	Pyruvate	PYR	IC-MS	S24_QC_a_mouse_NA_NA_NA_2_08_BD2	3.65	1.25	252364960						Quality Control
575	Pyruvate	PYR	IC-MS	S22_blank.is_a_NA_NA_NA_NA_NA_11_BA5	3.63	0.86	39577252						Blank
579	Pyruvate	PYR	IC-MS	S24_QC_a_mouse_NA_NA_NA_2_29_BD2	3.63	1.75	304105888						Quality Control
580	Pyruvate	PYR	IC-MS	S24_QC_a_mouse_NA_NA_NA_2_47_BD2	3.63	1.93	353584320						Quality Control
595	Sedoheptulose-7-phosphate	S7P	IC-MS	S23_QC_a_mouse_NA_NA_NA_1_06_BA3	11.45	0.186	21734134						Quality Control
597	Sedoheptulose-7-phosphate	S7P	IC-MS	S24_QC_a_mouse_NA_NA_NA_2_29_BD2	11.46	0.25	24200120						Quality Control
598	Sedoheptulose-7-phosphate	S7P	IC-MS	S23_QC_a_mouse_NA_NA_NA_1_27_BA3	11.44	0.211	24082006						Quality Control
599	Sedoheptulose-7-phosphate	S7P	IC-MS	S23_QC_a_mouse_NA_NA_NA_1_45_BA3	11.44	0.254	30474286						Quality Control
600	Sedoheptulose-7-phosphate	S7P	IC-MS	S24_QC_a_mouse_NA_NA_NA_2_08_BD2	11.45	0.206	20577582						Quality Control
607	Sedoheptulose-7-phosphate	S7P	IC-MS	S24_QC_a_mouse_NA_NA_NA_2_47_BD2	11.44	0.229	24762708						Quality Control
619	Succinate	SUC	IC-MS	S22_blank.is_a_NA_NA_NA_NA_NA_11_BA5	9.21	0.105	4815078						Blank
620	Succinate	SUC	IC-MS	S24_QC_a_mouse_NA_NA_NA_2_08_BD2	9.19	19.5	3920826880						Quality Control
625	Succinate	SUC	IC-MS	S23_QC_a_mouse_NA_NA_NA_1_06_BA3	9.21	20.1	3942450176						Quality Control
626	Succinate	SUC	IC-MS	S23_QC_a_mouse_NA_NA_NA_1_27_BA3	9.17	19.6	3789243904						Quality Control
627	Succinate	SUC	IC-MS	S23_QC_a_mouse_NA_NA_NA_1_45_BA3	9.17	19.7	3780537856						Quality Control
629	Succinate	SUC	IC-MS	S24_QC_a_mouse_NA_NA_NA_2_29_BD2	9.21	20.4	3558123520						Quality Control
630	Succinate	SUC	IC-MS	S24_QC_a_mouse_NA_NA_NA_2_47_BD2	9.21	19.4	3561500160						Quality Control
