# Supplementary material for: Autophagy regulator ATG5 preserves cerebellar function by safeguarding its glycolytic activity
Source: Research Square preprint supplement (doi:10.21203/rs.3.rs-3921650/v1), 2024-02-08
Supplement: Supplementary file 3 [file 9c7a3e7162e8d47060c8302f.xlsx]

## Sheet: legend
	proteome data set from 1-month and 3-months old cerebellum of WT and ATG5 cKO
	Fig. 2a	List of differentially expressed proteins (p< 0.05; FC >< 0.25) in 1-month ATG5 cKO cerebellum
	Fig. 2b	List of differentially expressed proteins (p< 0.05; FC >< 0.25) in 3-months old ATG5 cKO cerebellum
	Fig. 2c-e	List of differentially expressed proteins (p< 0.05; FC >< 0.25) used for pathway analysis in Fig.2 c-e and Fig.S3 a-h

## Sheet: whole dataset
				LFQ log2																overview					annotations							filtered <= 0.01 & >=2unique			removed due to precursor#				means & valid values (filtered 4/4)								oneway ANOVA & T-test details
Protein.Group	Genes	Protein.Names	First.Protein.Description	WT_3m_01	WT_3m_02	WT_3m_04	WT_3m_05	KO_3m_07	KO_3m_08	KO_3m_09	KO_3m_10	WT_1m_11	WT_1m_12	WT_1m_14	WT_1m_15	KO_1m_16	KO_1m_17	KO_1m_18	KO_1m_20	ANOVA Significant	Student's T-test Significant WT_3m_WT_1m	Student's T-test Significant KO_3m_KO_1m	Student's T-test Significant KO_3m_WT_3m	Student's T-test Significant KO_1m_WT_1m	GOBP name	GOMF name	GOCC name	KEGG name	Pfam	GSEA	Reactome	Lib.PG.Q.Value	Global.PG.Q.Value	count.stripped.sequence	WT_3m_03	KO_3m_06	WT_1m_13	KO_1m_19	Mean.WT_3m	Mean.KO_3m	Mean.WT_1m	Mean.KO_1m	Valid.values.WT_3m	Valid.values.KO_3m	Valid.values.WT_1m	Valid.values.KO_1m	-Log ANOVA p value	ANOVA q-value	-Log Student's T-test p-value WT_3m_WT_1m
A2A432	Cul4b	CUL4B_MOUSE	Cullin-4B	23.0827	22.9542	22.849	23.0903	23.1185	23.3561	23.1903	23.2193	23.2606	23.2304	23.2446	23.1713	23.2529	23.1114	22.5663	22.9286						biological regulation;cell cycle;cellular component organization;cellular component organization at cellular level;cellular component organization or biogenesis;cellular component organization or biogenesis at cellular level;cellular macromolecule metabolic process;cellular metabolic process;cellular nitrogen compound metabolic process;cellular process;cellular protein metabolic process;cellular …	binding;damaged DNA binding;DNA binding;nucleic acid binding	cell part;CUL4 RING ubiquitin ligase complex;Cul4B-RING ubiquitin ligase complex;cullin-RING ubiquitin ligase complex;cytoplasm;extracellular membrane-bounded organelle;extracellular organelle;extracellular region part;extracellular vesicular exosome;intracellular organelle part;intracellular part;macromolecular complex;membrane;membrane-bounded organelle;membrane-bounded vesicle;nuclear part;nuc…	Nucleotide excision repair;Ubiquitin mediated proteolysis	Cullin;Cullin_Nedd8	BASAKI_YBX1_TARGETS_DN;CHARAFE_BREAST_CANCER_LUMINAL_VS_MESENCHYMAL_DN;CHEOK_RESPONSE_TO_MERCAPTOPURINE_DN;chrxq23;chrxq24;DIAZ_CHRONIC_MEYLOGENOUS_LEUKEMIA_UP;FLECHNER_PBL_KIDNEY_TRANSPLANT_OK_VS_DONOR_UP;FORTSCHEGGER_PHF8_TARGETS_DN;GRAESSMANN_APOPTOSIS_BY_DOXORUBICIN_DN;GSE10239_MEMORY_VS_KLRG1HIGH_EFF_CD8_TCELL_DN;GSE13306_RA_VS_UNTREATED_TREG_UP;GSE13484_3H_UNSTIM_VS_YF17D_VACCINE_STIM_PBMC_…	REACT_358684	0.000146177	0.000169492	20	23.0687	23.0069	24.3832	22.6437	22.9941	23.221	23.2267	22.9648	4	4	4	4	1.0844	0.0995618	2.06216
O88983	Stx8	STX8_MOUSE	Syntaxin-8	20.2173	20.1006	20.5075	20.1643	20.4741	20.1872	20.4466	20.3845	19.6689	20.129	19.872	20.3871	20.2351	20.4442	20.4649	20.6426						cellular component organization;cellular component organization at cellular level;cellular component organization or biogenesis;cellular component organization or biogenesis at cellular level;cellular membrane fusion;cellular membrane organization;cellular process;early endosome to late endosome transport;endosome to lysosome transport;endosome transport;establishment of localization;establishmen…	binding;channel inhibitor activity;channel regulator activity;chloride channel inhibitor activity;chloride channel regulator activity;enzyme binding;ion channel inhibitor activity;protein binding;SNAP receptor activity;SNARE binding;syntaxin binding;ubiquitin protein ligase binding	cell part;cytoplasmic part;early endosome;endosomal part;endosome;endosome membrane;Golgi apparatus part;integral to membrane;intracellular membrane-bounded organelle;intracellular organelle;intracellular organelle part;intracellular part;intrinsic to membrane;late endosome;late endosome membrane;lysosomal membrane;macromolecular complex;membrane;membrane part;membrane-bounded organelle;organelle…	SNARE interactions in vesicular transport	SNARE	BRUINS_UVC_RESPONSE_LATE;BUYTAERT_PHOTODYNAMIC_THERAPY_STRESS_DN;chr17p12;CYTOPLASM;CYTOPLASMIC_PART;DAIRKEE_TERT_TARGETS_UP;ENDOPLASMIC_RETICULUM;ENK_UV_RESPONSE_EPIDERMIS_DN;ESTABLISHMENT_OF_LOCALIZATION;GAJATE_RESPONSE_TO_TRABECTEDIN_DN;GRAESSMANN_APOPTOSIS_BY_DOXORUBICIN_DN;GRAESSMANN_RESPONSE_TO_MC_AND_DOXORUBICIN_DN;GSE10239_MEMORY_VS_KLRG1HIGH_EFF_CD8_TCELL_UP;GSE14308_TH1_VS_NATURAL_TREG_…		0.000146177	0.000169492	4	NaN	NaN	NaN	NaN	20.2474	20.3731	20.0142	20.4467	4	4	4	4	1.23899	0.050397	0.614914
A2A5Z6	Smurf2	SMUF2_MOUSE	E3 ubiquitin-protein ligase SMURF2	18.0589	18.1509	17.7801	18.2625	17.739	18.4228	16.7683	18.2217	18.3292	16.8503	18.1881	16.6663	16.8004	17.8499	16.6783	16.1942	+					biological regulation;catabolic process;cell surface receptor linked signaling pathway;cellular catabolic process;cellular macromolecule catabolic process;cellular macromolecule metabolic process;cellular metabolic process;cellular process;cellular protein metabolic process;cellular response to stimulus;enzyme linked receptor protein signaling pathway;macromolecule catabolic process;macromolecule…	acid-amino acid ligase activity;binding;catalytic activity;identical protein binding;ligase activity;ligase activity, forming carbon-nitrogen bonds;protein binding;SMAD binding;small conjugating protein ligase activity;ubiquitin-protein ligase activity	cell part;cytoplasm;cytoplasmic part;cytosol;intracellular membrane-bounded organelle;intracellular organelle;intracellular part;macromolecular complex;membrane;membrane part;membrane raft;membrane-bounded organelle;nucleus;organelle;plasma membrane;protein complex;ubiquitin ligase complex	Endocytosis;TGF-beta signaling pathway;Ubiquitin mediated proteolysis	C2;HECT;WW	AAGCCAT,MIR-135A,MIR-135B;ACCAAAG,MIR-9;ACID_AMINO_ACID_LIGASE_ACTIVITY;BCAT_BILD_ET_AL_DN;BIOPOLYMER_CATABOLIC_PROCESS;BIOPOLYMER_METABOLIC_PROCESS;BRUINS_UVC_RESPONSE_EARLY_LATE;BUYTAERT_PHOTODYNAMIC_THERAPY_STRESS_DN;CAGCCTC,MIR-485-5P;CAGGTA_V$AREB6_01;CAGGTG_V$E12_Q6;CAGTATT,MIR-200B,MIR-200C,MIR-429;CASORELLI_ACUTE_PROMYELOCYTIC_LEUKEMIA_UP;CATABOLIC_PROCESS;CCAWYNNGAAR_UNKNOWN;CELLULAR_CAT…	REACT_275732;REACT_294789;REACT_334226;REACT_337844;REACT_342636;REACT_343568;REACT_351311	0.000146177	0.000313529	2	17.7845	18.1289	NaN	NaN	18.0631	18.1278	18.2586	17.2641	4	3	2	2	0.865817	0.033499	0.582239
A2A690	Tanc2	TANC2_MOUSE	Protein TANC2	19.6381	19.9627	19.6326	19.777	20.4353	19.752	19.6262	19.739	20.2334	20.4865	20.4648	20.2819	20.3622	20.21	20.3556	21.404	+	+				chordate embryonic development;developmental process;embryo development;embryo development ending in birth or egg hatching;in utero embryonic development				Ank;Ank_2	ACEVEDO_FGFR1_TARGETS_IN_PROSTATE_CANCER_MODEL_DN;ACEVEDO_LIVER_CANCER_WITH_H3K27ME3_UP;ACEVEDO_METHYLATED_IN_LIVER_CANCER_DN;BUYTAERT_PHOTODYNAMIC_THERAPY_STRESS_UP;CAMP_UP.V1_DN;CERVERA_SDHB_TARGETS_1_UP;chr17q23;FIGUEROA_AML_METHYLATION_CLUSTER_3_UP;FIGUEROA_AML_METHYLATION_CLUSTER_4_UP;FIGUEROA_AML_METHYLATION_CLUSTER_6_UP;FIGUEROA_AML_METHYLATION_CLUSTER_7_UP;GCM_CRKL;GCM_MAP4K4;GOZGIT_ESR1_…		0.000146177	0.000169492	12	19.2361	20.2497	22.9828	19.4225	19.7526	19.8881	20.3666	20.583	4	4	4	4	1.77988	0.0089607	3.05723
A2A699	Fam171a2	F1712_MOUSE	Protein FAM171A2	20.9642	20.8645	20.5627	20.9193	21.098	21.1234	21.0881	21.001	20.653	20.9864	20.7588	20.533	20.6871	20.5348	20.38	21.067								cell part;integral to membrane;intrinsic to membrane;membrane part		UPF0560	chr17q21;GSE17974_IL4_AND_ANTI_IL12_VS_UNTREATED_4H_ACT_CD4_TCELL_DN;GSE19825_NAIVE_VS_DAY3_EFF_CD8_TCELL_UP;GSE19825_NAIVE_VS_IL2RAHIGH_DAY3_EFF_CD8_TCELL_UP;GSE19825_NAIVE_VS_IL2RALOW_DAY3_EFF_CD8_TCELL_UP;GSE7400_CTRL_VS_CSF3_IN_VIVO_TREATED_PBMC_DN;SCHAEFFER_PROSTATE_DEVELOPMENT_6HR_DN		0.000146177	0.000169492	10	20.6217	20.6221	NaN	NaN	20.8277	21.0776	20.7328	20.6672	4	4	4	4	1.22233	0.0561456	0.301
A2A6A1	Gpatch8	GPTC8_MOUSE	G patch domain-containing protein 8	18.0461	16.8303	16.8675	16.907	16.7711	17.0522	16.7683	17.4424	18.2971	18.2079	18.0027	17.7118	17.6975	16.5422	18.1463	16.1942	+	+					binding;cation binding;ion binding;metal ion binding			G-patch;zf-C2H2_jaz	ACTTTAT,MIR-142-5P;AGUIRRE_PANCREATIC_CANCER_COPY_NUMBER_UP;ATGCTGC,MIR-103,MIR-107;BUYTAERT_PHOTODYNAMIC_THERAPY_STRESS_UP;chr17q21;DACOSTA_UV_RESPONSE_VIA_ERCC3_DN;DACOSTA_UV_RESPONSE_VIA_ERCC3_TTD_DN;DACOSTA_UV_RESPONSE_VIA_ERCC3_XPCS_DN;GGCAGTG,MIR-324-3P;GRAESSMANN_APOPTOSIS_BY_DOXORUBICIN_DN;GSE17721_LPS_VS_CPG_12H_BMDM_UP;GSE20715_0H_VS_48H_OZONE_LUNG_UP;GSE22886_NAIVE_CD4_TCELL_VS_MEMORY_…		0.000146177	0.000169492	4	18.1405	17.6778	NaN	18.605	18.0461	17.4424	18.0549	17.9219	1	1	4	2	1.02566	0.0244239	1.48838
Q6P9J9	Ano6	ANO6_MOUSE	Anoctamin-6	20.1841	20.5223	19.2489	20.0359	19.5012	19.479	19.8826	19.6215	19.6188	20.0272	20.4658	19.7194	19.7229	19.4631	19.2682	19.0922	+					activation of blood coagulation via clotting cascade;anatomical structure development;anion transport;biological regulation;biomineral tissue development;blood coagulation;bone mineralization;bone mineralization involved in bone maturation;cation transport;cell chemotaxis;cell migration;cell motility;cellular component movement;cellular component organization;cellular component organization or bi…	anion channel activity;anion transmembrane transporter activity;binding;calcium activated cation channel activity;cation channel activity;cation transmembrane transporter activity;channel activity;chloride channel activity;gated channel activity;identical protein binding;intracellular calcium activated chloride channel activity;ion channel activity;ion gated channel activity;ion transmembrane tra…	cell part;cell surface;chloride channel complex;extracellular membrane-bounded organelle;extracellular organelle;extracellular region part;extracellular vesicular exosome;intracellular;ion channel complex;macromolecular complex;membrane;membrane part;membrane-bounded organelle;membrane-bounded vesicle;organelle;plasma membrane;protein complex;vesicle		Anoctamin	AAGCACT,MIR-520F;ACEVEDO_LIVER_TUMOR_VS_NORMAL_ADJACENT_TISSUE_UP;AGCACTT,MIR-93,MIR-302A,MIR-302B,MIR-302C,MIR-302D,MIR-372,MIR-373,MIR-520E,MIR-520A,MIR-526B,MIR-520B,MIR-520C,MIR-520D;ALONSO_METASTASIS_UP;BOYLAN_MULTIPLE_MYELOMA_D_CLUSTER_DN;CHEN_METABOLIC_SYNDROM_NETWORK;chr12q12;DODD_NASOPHARYNGEAL_CARCINOMA_DN;DUTERTRE_ESTRADIOL_RESPONSE_24HR_DN;EHLERS_ANEUPLOIDY_DN;GCACTTT,MIR-17-5P,MIR-20…	REACT_346473	0.000146177	0.000169492	6	NaN	19.6911	NaN	NaN	19.9978	19.6211	19.9578	19.3866	4	4	4	4	0.956146	0.0448834	0.0421443
A2A6T1	Cdr2l	CDR2L_MOUSE	Cerebellar degeneration-related protein 2-like	21.2295	21.5028	21.3604	21.2749	21.0018	20.9463	21.1572	20.9718	21.1198	21.2726	21.2064	21.388	21.5297	21.5095	21.55	20.9458											AACTGGA,MIR-145;AACTTT_UNKNOWN;AMIT_SERUM_RESPONSE_120_MCF10A;BLALOCK_ALZHEIMERS_DISEASE_UP;BROWNE_HCMV_INFECTION_10HR_UP;BROWNE_HCMV_INFECTION_20HR_UP;BROWNE_HCMV_INFECTION_6HR_UP;BURTON_ADIPOGENESIS_PEAK_AT_2HR;BUYTAERT_PHOTODYNAMIC_THERAPY_STRESS_UP;CAATGCA,MIR-33;CAHOY_OLIGODENDROCUTIC;CATTGTYY_V$SOX9_B1;chr17q25;CTCAGGG,MIR-125B,MIR-125A;CTTTGT_V$LEF1_Q2;CYCLIN_D1_KE_.V1_UP;E2F1_UP.V1_UP;GAT…		0.000146177	0.000169492	5	21.2047	20.6801	NaN	21.6319	21.3419	21.0193	21.2467	21.3837	4	4	4	4	1.29947	0.0606038	0.534041
A2A791	Zmym4	ZMYM4_MOUSE	Zinc finger MYM-type protein 4	19.3503	19.1935	16.8675	19.7538	19.6256	19.7245	19.4475	19.6666	19.4039	19.6271	19.3831	19.6048	19.3831	19.467	19.278	19.119						biological regulation;cellular component organization;cellular component organization at cellular level;cellular component organization or biogenesis;cellular component organization or biogenesis at cellular level;cellular process;cytoskeleton organization;organelle organization;regulation of anatomical structure morphogenesis;regulation of biological process;regulation of cell morphogenesis;regu…	binding;cation binding;ion binding;metal ion binding;transition metal ion binding;zinc ion binding	cell part;cytoplasm;intracellular membrane-bounded organelle;intracellular non-membrane-bounded organelle;intracellular organelle;intracellular organelle part;intracellular part;membrane-bounded organelle;non-membrane-bounded organelle;nuclear part;nucleolus;nucleoplasm;nucleus;organelle;organelle part		DUF3504;zf-FCS	AACTTT_UNKNOWN;ACEVEDO_METHYLATED_IN_LIVER_CANCER_DN;BLALOCK_ALZHEIMERS_DISEASE_DN;BLALOCK_ALZHEIMERS_DISEASE_UP;BYSTRYKH_HEMATOPOIESIS_STEM_CELL_AND_BRAIN_QTL_TRANS;CACTGCC,MIR-34A,MIR-34C,MIR-449;CAGCTG_V$AP4_Q5;CAGTATT,MIR-200B,MIR-200C,MIR-429;CATTTCA,MIR-203;CCTNTMAGA_UNKNOWN;chr1p34;CTTTAAR_UNKNOWN;DACOSTA_UV_RESPONSE_VIA_ERCC3_COMMON_DN;DACOSTA_UV_RESPONSE_VIA_ERCC3_DN;DNA_BINDING;GAZDA_DI…		0.000146177	0.000169492	5	20.0979	NaN	NaN	18.6273	19.4325	19.616	19.5047	19.3118	3	4	4	4	0.461602	0.129451	0.497592
Q9D8Z6	Atg101	ATGA1_MOUSE	Autophagy-related protein 101	20.4634	19.708	20.0715	20.121	20.2044	20.3367	20.1477	20.2491	20.2947	20.1451	20.1513	19.8072	20.0001	19.7987	19.5439	19.6598	+		+			autophagic vacuole assembly;cellular component assembly;cellular component assembly at cellular level;cellular component organization;cellular component organization at cellular level;cellular component organization or biogenesis;cellular component organization or biogenesis at cellular level;cellular process;organelle assembly;organelle organization;vacuole organization	binding;identical protein binding;protein binding;protein complex binding	cell part;cytoplasmic part;intracellular part;pre-autophagosomal structure		DUF1649			0.000146177	0.000169492	3	20.4131	20.5401	NaN	20.2771	20.091	20.2345	20.0996	19.7506	4	4	4	4	1.37316	0.0367333	0.015645
O70435	Psma3	PSA3_MOUSE	Proteasome subunit alpha type-3	23.7721	23.9889	23.9441	23.6836	23.8204	23.6444	23.8182	23.8348	23.841	24.077	23.8574	24.1191	24.1785	24.0885	24.296	24.559	+		+			catabolic process;cellular catabolic process;cellular macromolecule catabolic process;cellular macromolecule metabolic process;cellular metabolic process;cellular process;macromolecule catabolic process;macromolecule metabolic process;metabolic process;modification-dependent macromolecule catabolic process;modification-dependent protein catabolic process;primary metabolic process;proteasomal prot…	catalytic activity;endopeptidase activity;hydrolase activity;peptidase activity;peptidase activity, acting on L-amino acid peptides;threonine-type endopeptidase activity;threonine-type peptidase activity	cell part;cytoplasm;cytoplasmic part;cytosol;extracellular membrane-bounded organelle;extracellular organelle;extracellular region part;extracellular vesicular exosome;intracellular membrane-bounded organelle;intracellular organelle;intracellular part;macromolecular complex;membrane-bounded organelle;membrane-bounded vesicle;nucleus;organelle;proteasome complex;proteasome core complex;proteasome …	Proteasome	Proteasome;Proteasome_A_N	ACEVEDO_NORMAL_TISSUE_ADJACENT_TO_LIVER_TUMOR_DN;BAELDE_DIABETIC_NEPHROPATHY_DN;BASSO_B_LYMPHOCYTE_NETWORK;BENPORATH_MYC_TARGETS_WITH_EBOX;BENPORATH_OCT4_TARGETS;BENPORATH_PROLIFERATION;BHATI_G2M_ARREST_BY_2METHOXYESTRADIOL_UP;BHATTACHARYA_EMBRYONIC_STEM_CELL;BIOCARTA_PROTEASOME_PATHWAY;CHIARADONNA_NEOPLASTIC_TRANSFORMATION_KRAS_UP;chr14q23;CYTOPLASM;DIAZ_CHRONIC_MEYLOGENOUS_LEUKEMIA_UP;FLECHNER_…	REACT_274287;REACT_275686;REACT_275732;REACT_278878;REACT_289441;REACT_294625;REACT_297888;REACT_299120;REACT_301078;REACT_308964;REACT_310780;REACT_315933;REACT_321346;REACT_326233;REACT_329431;REACT_334737;REACT_336463;REACT_336745;REACT_337766;REACT_341044;REACT_341075;REACT_342086;REACT_342636;REACT_343561;REACT_343568;REACT_345193;REACT_347264;REACT_351311;REACT_353777;REACT_359269;REACT_359…	0.000146177	0.000169492	12	23.7573	23.5108	25.9612	24.4402	23.8472	23.7795	23.9736	24.2805	4	4	4	4	2.59524	0.00989722	0.582597
A2A8Z1	Osbpl9	OSBL9_MOUSE	Oxysterol-binding protein-related protein 9	21.1962	21.547	21.4254	21.2207	21.359	21.2585	21.15	21.446	20.8158	21.2968	21.0715	21.2644	21.4076	21.4792	21.3702	21.302						establishment of localization;lipid transport;organic substance transport;transport	binding;lipid binding	cell part;cytoplasm;cytoplasmic part;endosomal part;endosome membrane;Golgi apparatus;intracellular membrane-bounded organelle;intracellular organelle;intracellular organelle part;intracellular part;late endosome membrane;membrane;membrane-bounded organelle;organelle;organelle membrane;organelle part		Oxysterol_BP;PH	AACTTT_UNKNOWN;BAKKER_FOXO3_TARGETS_UP;BOYAULT_LIVER_CANCER_SUBCLASS_G6_DN;BRUINS_UVC_RESPONSE_LATE;BYSTRYKH_HEMATOPOIESIS_STEM_CELL_QTL_TRANS;CAGGTG_V$E12_Q6;CHARAFE_BREAST_CANCER_LUMINAL_VS_BASAL_DN;chr1p32;CTCAGGG,MIR-125B,MIR-125A;CTTTAAR_UNKNOWN;DITTMER_PTHLH_TARGETS_UP;DORSAM_HOXA9_TARGETS_UP;GATTGGY_V$NFY_Q6_01;GOBERT_OLIGODENDROCYTE_DIFFERENTIATION_DN;GRAESSMANN_APOPTOSIS_BY_DOXORUBICIN_D…		0.000146177	0.000169492	12	20.876	20.955	22.7163	21.209	21.3473	21.3034	21.1121	21.3898	4	4	4	4	0.935123	0.155617	0.849482
A2AAE1	Kiaa1109	K1109_MOUSE	Transmembrane protein KIAA1109	19.9994	19.4176	18.9699	19.8386	19.6081	19.8947	19.712	19.5907	19.683	19.4738	19.6518	19.0327	19.2728	19.259	18.8983	18.2583	+		+			adipose tissue development;anatomical structure development;biological regulation;cell differentiation;cellular developmental process;cellular localization;cellular process;developmental process;fat cell differentiation;gamete generation;lipid localization;lipid metabolic process;lipid storage;localization;macromolecule localization;male gamete generation;metabolic process;multicellular organisma…		cell part;integral to membrane;intracellular membrane-bounded organelle;intracellular organelle;intracellular part;intrinsic to membrane;membrane part;membrane-bounded organelle;nucleus;organelle		FSA_C	CHANG_CORE_SERUM_RESPONSE_DN;chr4q28;CLAUS_PGR_POSITIVE_MENINGIOMA_UP;DACOSTA_UV_RESPONSE_VIA_ERCC3_COMMON_DN;DACOSTA_UV_RESPONSE_VIA_ERCC3_DN;DUTERTRE_ESTRADIOL_RESPONSE_24HR_DN;FLECHNER_BIOPSY_KIDNEY_TRANSPLANT_OK_VS_DONOR_UP;FLECHNER_BIOPSY_KIDNEY_TRANSPLANT_REJECTED_VS_OK_DN;FOSTER_TOLERANT_MACROPHAGE_DN;GCM_DEAF1;GCM_DLG1;GCM_ERBB2IP;GCM_MAP4K4;GCM_PTK2;GCM_PTPRD;GCM_RAN;GRAESSMANN_APOPTOSIS…		0.000146177	0.000169492	20	19.6343	19.8063	NaN	NaN	19.5564	19.7014	19.4603	18.9221	4	4	4	4	1.26342	0.0218322	0.131353
Q3UH68	Limch1	LIMC1_MOUSE	LIM and calponin homology domains-containing protein 1	21.5906	21.3769	21.3518	21.4436	21.2462	21.4703	21.4402	21.4102	21.1904	21.3679	21.4021	21.3144	21.4266	21.4	21.6271	21.4962						actin cytoskeleton organization;actin filament-based process;actomyosin structure organization;cellular component organization;cellular component organization at cellular level;cellular component organization or biogenesis;cellular component organization or biogenesis at cellular level;cellular process;cytoskeleton organization;organelle organization	binding;cation binding;ion binding;metal ion binding;transition metal ion binding;zinc ion binding			CH;LIM	AAGCAAT,MIR-137;ACEVEDO_LIVER_CANCER_WITH_H3K27ME3_UP;ACEVEDO_LIVER_CANCER_WITH_H3K9ME3_UP;ACEVEDO_METHYLATED_IN_LIVER_CANCER_DN;ATF2_UP.V1_DN;BONOME_OVARIAN_CANCER_POOR_SURVIVAL_UP;BONOME_OVARIAN_CANCER_SURVIVAL_SUBOPTIMAL_DEBULKING;BOQUEST_STEM_CELL_CULTURED_VS_FRESH_UP;CATTTCA,MIR-203;CHEBOTAEV_GR_TARGETS_DN;chr4p13;CREIGHTON_ENDOCRINE_THERAPY_RESISTANCE_3;CREIGHTON_ENDOCRINE_THERAPY_RESISTANC…		0.000146177	0.000169492	21	21.6094	21.4319	22.4239	21.8655	21.4407	21.3917	21.3187	21.4875	4	4	4	4	0.798031	0.367619	0.866383
A2ADY9	Ddi2	DDI2_MOUSE	Protein DDI1 homolog 2	21.3723	21.3231	21.4795	21.5194	21.4038	21.565	21.5612	21.7515	21.0941	21.4833	21.1645	21.33	21.3258	21.5203	21.3683	20.9485							aspartic-type endopeptidase activity;aspartic-type peptidase activity;catalytic activity;endopeptidase activity;hydrolase activity;peptidase activity;peptidase activity, acting on L-amino acid peptides			Asp_protease;ubiquitin	CHARAFE_BREAST_CANCER_LUMINAL_VS_MESENCHYMAL_UP;chr1p36;CTACCTC,LET-7A,LET-7B,LET-7C,LET-7D,LET-7E,LET-7F,MIR-98,LET-7G,LET-7I;DOUGLAS_BMI1_TARGETS_DN;GRAESSMANN_APOPTOSIS_BY_DOXORUBICIN_DN;GSE13306_RA_VS_UNTREATED_TREG_UP;GSE14308_TH1_VS_TH17_DN;GSE14308_TH2_VS_TH17_DN;GSE14769_20MIN_VS_360MIN_LPS_BMDM_UP;GSE2197_CPG_DNA_VS_UNTREATED_IN_DC_DN;GSE26669_CTRL_VS_COSTIM_BLOCK_MLR_CD8_TCELL_DN;GSE270…		0.000146177	0.000169492	7	20.969	21.1861	NaN	21.65	21.4236	21.5704	21.268	21.2907	4	4	4	4	1.01211	0.111808	0.782649
Q5RJH6	Smg7	SMG7_MOUSE	Protein SMG7	16.7211	16.8303	16.8675	18.1571	17.9184	17.0522	18.2951	17.9916	18.9048	18.3628	18.5084	18.3963	18.0788	16.5422	18.2666	17.0852	+	+				catabolic process;cellular catabolic process;cellular macromolecule catabolic process;cellular macromolecule metabolic process;cellular metabolic process;cellular nitrogen compound metabolic process;cellular process;macromolecule catabolic process;macromolecule metabolic process;metabolic process;mRNA catabolic process;mRNA metabolic process;nitrogen compound metabolic process;nuclear-transcribed…	binding;enzyme binding;phosphatase binding;protein binding;protein phosphatase 2A binding;protein phosphatase binding	cell part;cytoplasm;cytoskeleton;intermediate filament cytoskeleton;intracellular membrane-bounded organelle;intracellular non-membrane-bounded organelle;intracellular organelle;intracellular part;membrane-bounded organelle;non-membrane-bounded organelle;nucleus;organelle	mRNA surveillance pathway	EST1;EST1_DNA_bind	AGGAAGC,MIR-516-3P;ATAGGAA,MIR-202;ATGAAGG,MIR-205;BENPORATH_SOX2_TARGETS;BIOPOLYMER_CATABOLIC_PROCESS;BIOPOLYMER_METABOLIC_PROCESS;BOYAULT_LIVER_CANCER_SUBCLASS_G1_UP;BROWNE_HCMV_INFECTION_14HR_UP;BROWNE_HCMV_INFECTION_18HR_UP;CAGCAGG,MIR-370;CAGCTTT,MIR-320;CATABOLIC_PROCESS;CCTGTGA,MIR-513;CELLULAR_CATABOLIC_PROCESS;CELLULAR_LOCALIZATION;CELLULAR_MACROMOLECULE_CATABOLIC_PROCESS;chr1q25;CTTTGA_…	REACT_279505	0.000146177	0.000169492	5	NaN	NaN	NaN	NaN	18.1571	18.0684	18.5431	17.8102	1	3	4	3	1.4146	0.0102237	2.08407
Q9Z1G3	Atp6v1c1	VATC1_MOUSE	V-type proton ATPase subunit C 1	23.5618	23.7837	23.711	23.5885	23.7773	23.6339	23.6998	23.7003	23.1399	23.5086	23.36	23.6838	23.7626	23.7685	23.607	23.7487						ATP hydrolysis coupled proton transport;cation transport;cellular process;energy coupled proton transport, against electrochemical gradient;establishment of localization;hydrogen transport;ion transmembrane transport;ion transport;monovalent inorganic cation transport;proton transport;transmembrane transport;transport	active transmembrane transporter activity;ATPase activity;ATPase activity, coupled;ATPase activity, coupled to movement of substances;ATPase activity, coupled to transmembrane movement of ions;ATPase activity, coupled to transmembrane movement of ions, phosphorylative mechanism;ATPase activity, coupled to transmembrane movement of substances;catalytic activity;cation transmembrane transporter act…	apical part of cell;cell part;cytoplasmic part;cytoplasmic vesicle;extracellular membrane-bounded organelle;extracellular organelle;extracellular region part;extracellular vesicular exosome;intracellular organelle;intracellular organelle part;intracellular part;lysosomal membrane;macromolecular complex;membrane;membrane part;membrane-bounded organelle;membrane-bounded vesicle;organelle;organelle …	Collecting duct acid secretion;Epithelial cell signaling in Helicobacter pylori infection;Oxidative phosphorylation;Phagosome;Rheumatoid arthritis;Vibrio cholerae infection	V-ATPase_C	ACTIVE_TRANSMEMBRANE_TRANSPORTER_ACTIVITY;AGGAAGC,MIR-516-3P;AMUNDSON_RESPONSE_TO_ARSENITE;ATPASE_ACTIVITY;ATPASE_ACTIVITY_COUPLED;ATPASE_ACTIVITY_COUPLED_TO_MOVEMENT_OF_SUBSTANCES;ATPASE_ACTIVITY_COUPLED_TO_TRANSMEMBRANE_MOVEMENT_OF_IONS;BLALOCK_ALZHEIMERS_DISEASE_DN;BONOME_OVARIAN_CANCER_SURVIVAL_SUBOPTIMAL_DEBULKING;BROWNE_HCMV_INFECTION_10HR_UP;BROWNE_HCMV_INFECTION_14HR_UP;BRUINS_UVC_RESPONS…	REACT_290403;REACT_299823;REACT_324664	0.000146177	0.000169492	28	23.2036	23.2129	25.8314	22.6217	23.6613	23.7028	23.4231	23.7217	4	4	4	4	1.51413	0.0654098	0.963364
A2AG50	Map7d2	MA7D2_MOUSE	MAP7 domain-containing protein 2	19.8989	20.6418	20.6869	20.3493	20.4208	19.9495	19.9213	20.3773	19.4891	20.3846	19.7863	20.5052	20.2471	20.436	20.5495	21.3944						cellular component organization;cellular component organization at cellular level;cellular component organization or biogenesis;cellular component organization or biogenesis at cellular level;cellular process;cytoskeleton organization;microtubule cytoskeleton organization;microtubule-based process;organelle organization	structural molecule activity	cell part;cytoplasm;cytoskeletal part;cytoskeleton;intracellular non-membrane-bounded organelle;intracellular organelle;intracellular organelle part;intracellular part;macromolecular complex;microtubule;microtubule cytoskeleton;non-membrane-bounded organelle;organelle;organelle part;protein complex		MAP7	BENPORATH_EED_TARGETS;BENPORATH_SUZ12_TARGETS;BRUINS_UVC_RESPONSE_VIA_TP53_GROUP_A;FIGUEROA_AML_METHYLATION_CLUSTER_1_UP;FIGUEROA_AML_METHYLATION_CLUSTER_4_UP;FIGUEROA_AML_METHYLATION_CLUSTER_6_UP;GSE14769_UNSTIM_VS_20MIN_LPS_BMDM_UP;GSE18148_CBFB_KO_VS_WT_TREG_DN;GSE32423_IL7_VS_IL4_MEMORY_CD8_TCELL_DN;KINSEY_TARGETS_OF_EWSR1_FLII_FUSION_UP;LEE_BMP2_TARGETS_DN;LIAO_METASTASIS;MEISSNER_NPC_HCP_WI…		0.000146177	0.000169492	14	19.9767	19.9904	22.3358	19.359	20.3942	20.1672	20.0413	20.6568	4	4	4	4	0.652302	0.0928011	0.541393
A2AGH6	Med12	MED12_MOUSE	Mediator of RNA polymerase II transcription subunit 12	18.0299	18.1624	16.8675	17.92	16.7711	17.9658	18.2951	18.1614	18.8368	18.6641	18.6792	18.542	18.3967	18.9143	17.0931	16.1942		+				anatomical structure development;anatomical structure formation involved in morphogenesis;androgen receptor signaling pathway;axis elongation;axis elongation involved in somitogenesis;biological regulation;biosynthetic process;canonical Wnt receptor signaling pathway;cell development;cell surface receptor linked signaling pathway;cellular biosynthetic process;cellular developmental process;cellul…	binding;chromatin binding;DNA binding;enhancer binding;enhancer sequence-specific DNA binding;hormone receptor binding;nuclear hormone receptor binding;nucleic acid binding;protein binding;protein binding transcription factor activity;protein C-terminus binding;protein domain specific binding;receptor activity;receptor binding;regulatory region DNA binding;regulatory region nucleic acid binding;R…	cell part;centrosome;cytoplasmic part;cytoskeletal part;intracellular membrane-bounded organelle;intracellular non-membrane-bounded organelle;intracellular organelle;intracellular organelle part;intracellular part;macromolecular complex;mediator complex;membrane;membrane-bounded organelle;microtubule organizing center;non-membrane-bounded organelle;nuclear part;nucleolus;nucleoplasm;nucleoplasm p…		Med12;Med12-LCEWAV;Med12-PQL	AACTTT_UNKNOWN;AMBROSINI_FLAVOPIRIDOL_TREATMENT_TP53;ANDROGEN_RECEPTOR_SIGNALING_PATHWAY;BENPORATH_NANOG_TARGETS;BENPORATH_NOS_TARGETS;BENPORATH_OCT4_TARGETS;BENPORATH_SOX2_TARGETS;BIOPOLYMER_METABOLIC_PROCESS;CELLULAR_COMPONENT_ASSEMBLY;chrxq12;chrxq13;CRGAARNNNNCGA_UNKNOWN;CTGCAGY_UNKNOWN;CTTTAAR_UNKNOWN;CYCLIN_D1_UP.V1_UP;DEURIG_T_CELL_PROLYMPHOCYTIC_LEUKEMIA_UP;DIAZ_CHRONIC_MEYLOGENOUS_LEUKEM…	REACT_27166;REACT_275829;REACT_309805	0.000146177	0.000169492	5	18.3491	18.5776	NaN	NaN	18.0374	18.1408	18.6805	18.1347	3	3	4	3	0.593356	0.0719767	1.66995
A2AGT5	Ckap5	CKAP5_MOUSE	Cytoskeleton-associated protein 5	22.3027	22.4356	22.5746	22.4229	22.449	22.4316	22.4998	22.4206	22.3419	22.7005	22.6494	22.7988	22.756	22.6648	22.7257	22.2511						cell cycle phase;cell cycle process;cell division;cellular component organization;cellular component organization at cellular level;cellular component organization or biogenesis;cellular component organization or biogenesis at cellular level;cellular process;centrosome organization;cytoskeleton organization;establishment of localization;establishment of RNA localization;establishment or maintenan…	binding;cytoskeletal protein binding;microtubule binding;protein binding;ribonucleoprotein binding;tubulin binding	cell part;centrosome;cytoplasm;cytoplasmic part;cytoskeletal part;intracellular non-membrane-bounded organelle;intracellular organelle;intracellular organelle part;intracellular part;macromolecular complex;membrane;microtubule organizing center;non-membrane-bounded organelle;organelle;organelle part;protein complex;spindle pole		CLASP_N	BENPORATH_CYCLING_GENES;BIDUS_METASTASIS_UP;CAHOY_ASTROCYTIC;CAIRO_HEPATOBLASTOMA_CLASSES_UP;CELL_CYCLE_GO_0007049;CELL_CYCLE_PROCESS;CENTROSOME;CENTROSOME_ORGANIZATION_AND_BIOGENESIS;chr11p11;CUI_TCF21_TARGETS_2_UP;CYTOPLASM;CYTOPLASMIC_PART;CYTOSKELETAL_PART;CYTOSKELETON;CYTOSKELETON_ORGANIZATION_AND_BIOGENESIS;DACOSTA_UV_RESPONSE_VIA_ERCC3_COMMON_DN;DACOSTA_UV_RESPONSE_VIA_ERCC3_DN;DODD_NASOPH…	REACT_272448;REACT_276302;REACT_286537;REACT_306375;REACT_321346;REACT_328862;REACT_329805;REACT_345278;REACT_358264	0.000146177	0.000169492	59	22.0677	21.8752	24.0256	20.6521	22.434	22.4503	22.6226	22.5994	4	4	4	4	0.549308	0.330449	0.833803
A2AHC3	Camsap1	CAMP1_MOUSE	Calmodulin-regulated spectrin-associated protein 1	20.7611	20.7794	20.5999	21.0747	20.8342	20.9754	21.0747	21.0311	21.3853	21.6092	21.4441	21.4321	21.3215	21.2278	21.3675	21.3842	+	+				biological regulation;cell projection organization;cellular component organization;cellular component organization at cellular level;cellular component organization or biogenesis;cellular component organization or biogenesis at cellular level;cellular process;cytoskeleton organization;neuron projection development;organelle organization;regulation of anatomical structure morphogenesis;regulation …	binding;calmodulin binding;cytoskeletal protein binding;microtubule binding;protein binding;spectrin binding;tubulin binding	cell part;cytoplasm;cytoskeletal part;intracellular organelle part;intracellular part;macromolecular complex;microtubule;organelle part;protein complex		CAMSAP_CH;CAMSAP_CKK	AMIT_EGF_RESPONSE_480_HELA;ATGGYGGA_UNKNOWN;BONOME_OVARIAN_CANCER_SURVIVAL_OPTIMAL_DEBULKING;BROWNE_HCMV_INFECTION_16HR_UP;CCAWNWWNNNGGC_UNKNOWN;CHANDRAN_METASTASIS_UP;chr9q34;CREIGHTON_ENDOCRINE_THERAPY_RESISTANCE_2;DAVICIONI_MOLECULAR_ARMS_VS_ERMS_UP;DODD_NASOPHARYNGEAL_CARCINOMA_UP;GRADE_COLON_AND_RECTAL_CANCER_UP;GSE14026_TH1_VS_TH17_UP;GSE17721_0.5H_VS_12H_CPG_BMDM_DN;GSE17721_0.5H_VS_12H_GA…		0.000146177	0.000169492	22	20.7348	20.544	22.9934	20.2098	20.8038	20.9788	21.4677	21.3252	4	4	4	4	4.55599	0.00183812	3.02267
A2AI08	Tprn	TPRN_MOUSE	Taperin	20.6862	19.368	19.6557	20.2734	16.7711	17.0522	19.8648	20.2212	20.7314	20.3225	20.3521	20.1533	20.2647	20.1967	19.9645	19.1044	+					multicellular organismal process;neurological system process;sensory perception;sensory perception of mechanical stimulus;sensory perception of sound;system process		cell part;cell projection;intracellular part;microvillus;organelle part;stereocilium		Phostensin;Phostensin_N	AKT_UP.V1_UP;AKT_UP_MTOR_DN.V1_UP;BILANGES_RAPAMYCIN_SENSITIVE_GENES;GSE10239_MEMORY_VS_DAY4.5_EFF_CD8_TCELL_UP;GSE10239_NAIVE_VS_MEMORY_CD8_TCELL_DN;GSE14350_IL2RB_KO_VS_WT_TREG_UP;GSE17721_0.5H_VS_12H_LPS_BMDM_UP;GSE17721_12H_VS_24H_LPS_BMDM_DN;GSE17721_CTRL_VS_LPS_24H_BMDM_UP;GSE17721_CTRL_VS_PAM3CSK4_8H_BMDM_UP;GSE17974_0H_VS_2H_IN_VITRO_ACT_CD4_TCELL_UP;GSE17974_CTRL_VS_ACT_IL4_AND_ANTI_IL12…		0.000146177	0.000169492	7	NaN	NaN	NaN	20.5588	19.9958	20.043	20.3898	19.8826	4	2	4	4	1.06401	0.0162118	0.574093
A2AIV2	Virma	VIR_MOUSE	Protein virilizer homolog	18.6498	18.1199	17.5553	18.4179	17.9181	18.1526	18.6474	17.8842	18.7396	18.9453	19.0721	18.8203	18.7409	18.2901	18.4564	17.2274	+	+				cellular macromolecule metabolic process;cellular metabolic process;cellular nitrogen compound metabolic process;cellular process;macromolecule metabolic process;macromolecule methylation;macromolecule modification;metabolic process;methylation;mRNA metabolic process;mRNA methylation;mRNA modification;mRNA processing;nitrogen compound metabolic process;nucleic acid metabolic process;nucleobase-co…		cell part;intracellular organelle part;intracellular part;nuclear body;nuclear part;nuclear speck;nucleoplasm part;organelle part			AAAGACA,MIR-511;chr8q22;CTTTGTA,MIR-524;GSE11924_TH1_VS_TH2_CD4_TCELL_UP;GSE11924_TH2_VS_TH17_CD4_TCELL_DN;GSE13229_MATURE_VS_INTMATURE_NKCELL_DN;GSE13485_PRE_VS_POST_YF17D_VACCINATION_PBMC_UP;GSE17721_4H_VS_24H_POLYIC_BMDM_DN;GSE17721_POLYIC_VS_PAM3CSK4_8H_BMDM_UP;GSE27786_NKCELL_VS_NKTCELL_DN;GSE27786_NKTCELL_VS_MONO_MAC_UP;GSE31082_DP_VS_CD8_SP_THYMOCYTE_UP;GSE36392_TYPE_2_MYELOID_VS_MAC_IL25_…		0.000146177	0.000169492	10	18.4951	NaN	NaN	18.1692	18.1857	18.1506	18.8943	18.1787	4	4	4	4	0.99707	0.0331229	1.54271
P62754	Rps6	RS6_MOUSE	40S ribosomal protein S6	21.2201	21.2926	21.3592	20.8785	21.2076	20.8965	21.2241	21.1832	20.8268	21.4697	21.3828	21.8725	21.7725	21.8369	22.256	22.0663	+		+			activation-induced cell death of T cells;anatomical structure development;anatomical structure morphogenesis;apoptosis;biological regulation;biosynthetic process;carbohydrate homeostasis;cell activation;cell activation involved in immune response;cell cycle checkpoint;cell cycle phase;cell cycle process;cell death;cell development;cell differentiation;cell proliferation;cellular biosynthetic proc…	binding;enzyme binding;kinase binding;protein binding;protein kinase binding;structural constituent of ribosome;structural molecule activity	cell body;cell part;cell projection;cytoplasm;cytoplasmic part;cytosolic small ribosomal subunit;dendrite;intracellular membrane-bounded organelle;intracellular non-membrane-bounded organelle;intracellular organelle;intracellular organelle part;intracellular part;macromolecular complex;membrane;membrane-bounded organelle;neuron projection;non-membrane-bounded organelle;nuclear part;nucleolus;nucl…	Insulin signaling pathway;mTOR signaling pathway;Ribosome	Ribosomal_S6e	AGUIRRE_PANCREATIC_CANCER_COPY_NUMBER_DN;BENPORATH_MYC_MAX_TARGETS;BENPORATH_MYC_TARGETS_WITH_EBOX;BILANGES_SERUM_AND_RAPAMYCIN_SENSITIVE_GENES;BILANGES_SERUM_RESPONSE_TRANSLATION;BIOCARTA_IGF1MTOR_PATHWAY;BIOCARTA_MTOR_PATHWAY;CAIRO_HEPATOBLASTOMA_CLASSES_UP;CHEMICAL_HOMEOSTASIS;CHNG_MULTIPLE_MYELOMA_HYPERPLOID_UP;chr9p21;DAIRKEE_CANCER_PRONE_RESPONSE_BPA_E2;DANG_BOUND_BY_MYC;FERNANDEZ_BOUND_BY_…	REACT_279505;REACT_283781;REACT_283953;REACT_292264;REACT_292503;REACT_302277;REACT_305839;REACT_308559;REACT_311765;REACT_319670;REACT_331340;REACT_340387	0.000146177	0.000169492	6	20.875	19.9424	23.7516	20.3892	21.1876	21.1278	21.3879	21.9829	4	4	4	4	2.47192	0.00365217	0.359986
A2AJA9	Ajm1	AJM1_MOUSE	Apical junction component 1 homolog	22.8407	22.7661	22.9948	23.0016	22.7419	22.8591	22.7755	22.7996	22.7934	22.825	22.7054	22.86	22.7535	22.8856	22.5863	21.0943													0.000146177	0.000169492	22	23.0691	22.6583	NaN	21.3455	22.9008	22.794	22.796	22.3299	4	4	4	4	0.560451	0.12447	0.772447
A2AJI0	Map7d1	MA7D1_MOUSE	MAP7 domain-containing protein 1	22.8057	22.7329	22.6831	22.6014	22.7064	22.5929	22.9583	22.8846	22.0939	22.8537	22.6616	22.939	22.8508	23	22.9734	23.3467						cellular component organization;cellular component organization at cellular level;cellular component organization or biogenesis;cellular component organization or biogenesis at cellular level;cellular process;cytoskeleton organization;microtubule cytoskeleton organization;microtubule-based process;organelle organization	structural molecule activity	cell part;cytoplasm;cytoskeletal part;cytoskeleton;intracellular non-membrane-bounded organelle;intracellular organelle;intracellular organelle part;intracellular part;macromolecular complex;microtubule;microtubule cytoskeleton;non-membrane-bounded organelle;organelle;organelle part;protein complex;spindle		MAP7	ATACTGT,MIR-144;BILD_HRAS_ONCOGENIC_SIGNATURE;CAGTGTT,MIR-141,MIR-200A;CHARAFE_BREAST_CANCER_LUMINAL_VS_MESENCHYMAL_DN;chr1p34;FORTSCHEGGER_PHF8_TARGETS_DN;GCACCTT,MIR-18A,MIR-18B;GRAESSMANN_APOPTOSIS_BY_DOXORUBICIN_UP;GSE10325_LUPUS_CD4_TCELL_VS_LUPUS_BCELL_UP;GSE10325_MYELOID_VS_LUPUS_MYELOID_DN;GSE13485_CTRL_VS_DAY21_YF17D_VACCINE_PBMC_UP;GSE14308_TH2_VS_TH1_DN;GSE14350_TREG_VS_TEFF_IN_IL2RB_K…		0.000146177	0.000169492	16	22.2319	21.6509	23.8793	21.2438	22.7057	22.7855	22.6371	23.0427	4	4	4	4	0.865146	0.0969335	0.132785
A2AJK6	Chd7	CHD7_MOUSE	Chromodomain-helicase-DNA-binding protein 7	16.7211	16.8303	16.8675	16.907	16.7711	17.0522	16.7798	17.0574	18.4161	18.9905	18.9672	18.9793	18.8447	16.5422	19.0467	16.1942	+	+				adult behavior;adult heart development;adult locomotory behavior;adult walking behavior;anatomical structure development;anatomical structure morphogenesis;appendage development;appendage morphogenesis;artery morphogenesis;behavior;biological regulation;biosynthetic process;blood circulation;blood vessel development;blood vessel morphogenesis;camera-type eye development;cell activation;cell diffe…	adenyl nucleotide binding;adenyl ribonucleotide binding;ATP binding;binding;catalytic activity;chromatin binding;core promoter proximal region DNA binding;core promoter proximal region sequence-specific DNA binding;DNA binding;helicase activity;hydrolase activity;hydrolase activity, acting on acid anhydrides;hydrolase activity, acting on acid anhydrides, in phosphorus-containing anhydrides;nuclei…	cell part;intracellular membrane-bounded organelle;intracellular organelle;intracellular organelle part;intracellular part;membrane-bounded organelle;nuclear part;nucleoplasm;nucleus;organelle;organelle part		BRK;Chromo;Helicase_C;SNF2_N	AATGTGA,MIR-23A,MIR-23B;ACATATC,MIR-190;ACTGTAG,MIR-139;AGCATTA,MIR-155;ALCALAY_AML_BY_NPM1_LOCALIZATION_UP;ATAAGCT,MIR-21;BILD_E2F3_ONCOGENIC_SIGNATURE;BOQUEST_STEM_CELL_DN;CAIRO_HEPATOBLASTOMA_CLASSES_UP;CATGTAA,MIR-496;chr8q12;CHYLA_CBFA2T3_TARGETS_UP;CTACTGT,MIR-199A;CTTTGTA,MIR-524;DAVICIONI_MOLECULAR_ARMS_VS_ERMS_UP;DING_LUNG_CANCER_EXPRESSION_BY_COPY_NUMBER;DURAND_STROMA_MAX_DN;ESC_V6.5_UP…		0.000146177	0.000169492	5	NaN	NaN	NaN	NaN	NaN	16.7798	18.8382	18.9457	0	1	4	2	1.97923	0.00326667	5.02869
A2AKG8	Focad	FOCAD_MOUSE	Focadhesin	17.9527	18.0048	17.6408	18.3332	17.6655	17.8833	18.2111	17.6771	18.8107	18.1452	18.7409	17.9258	18.0275	18.2674	17.2479	18.0428								adherens junction;anchoring junction;cell junction;cell part;cell-substrate adherens junction;cell-substrate junction;focal adhesion;integral to membrane;intrinsic to membrane;membrane part		DUF3028;DUF3730			0.000146177	0.000169492	7	17.9719	17.8568	NaN	NaN	17.9829	17.8593	18.4056	17.8964	4	4	4	4	0.733689	0.0825147	0.806793
A2ALS5	Rap1gap	RPGP1_MOUSE	Rap1 GTPase-activating protein 1	21.7152	21.6332	21.7167	21.8235	21.6148	21.4815	21.6167	21.7936	21.5659	21.5291	21.5312	21.5138	21.4647	21.7574	21.3983	22.2981						biological regulation;positive regulation of catalytic activity;positive regulation of GTPase activity;positive regulation of hydrolase activity;positive regulation of molecular function;regulation of biological process;regulation of catabolic process;regulation of catalytic activity;regulation of cellular catabolic process;regulation of cellular metabolic process;regulation of cellular process;r…	binding;enzyme activator activity;enzyme binding;enzyme regulator activity;GTPase activator activity;GTPase binding;GTPase regulator activity;identical protein binding;nucleoside-triphosphatase regulator activity;protein binding;protein dimerization activity;protein homodimerization activity;Ras GTPase binding;small GTPase binding	cell part;cytoplasmic part;cytosol;Golgi apparatus part;Golgi membrane;intracellular organelle part;intracellular part;membrane;organelle membrane;organelle part		GoLoco;Rap_GAP	ACEVEDO_LIVER_CANCER_DN;ACEVEDO_LIVER_TUMOR_VS_NORMAL_ADJACENT_TISSUE_DN;ALFANO_MYC_TARGETS;BASAKI_YBX1_TARGETS_DN;BERNARD_PPAPDC1B_TARGETS_DN;CELL_FRACTION;chr1p36;CYTOPLASM;CYTOPLASMIC_PART;CYTOSOL;DURCHDEWALD_SKIN_CARCINOGENESIS_DN;ENK_UV_RESPONSE_EPIDERMIS_UP;ENZYME_ACTIVATOR_ACTIVITY;ENZYME_REGULATOR_ACTIVITY;FRASOR_RESPONSE_TO_ESTRADIOL_DN;GEORGES_CELL_CYCLE_MIR192_TARGETS;GEORGES_TARGETS_O…	REACT_307305	0.000146177	0.000169492	22	21.5586	21.1756	23.9969	21.9267	21.7221	21.6266	21.535	21.7296	4	4	4	4	0.246562	0.514014	2.44011
A2ALU4	Shroom2	SHRM2_MOUSE	Protein Shroom2	20.4264	20.258	20.2872	20.1363	20.5534	19.8016	20.0178	20.1792	20.9037	20.659	20.7115	20.4744	20.4217	20.3721	20.5899	22.4503		+				anatomical structure development;anatomical structure morphogenesis;apical protein localization;asymmetric protein localization;biological regulation;brain development;camera-type eye development;camera-type eye morphogenesis;cell junction maintenance;cell junction organization;cell migration;cell motility;cell-cell junction maintenance;cell-cell junction organization;cellular component maintenan…	actin binding;actin filament binding;beta-catenin binding;binding;cytoskeletal protein binding;protein binding;protein domain specific binding	adherens junction;anchoring junction;apical junction complex;apical plasma membrane;cell body;cell cortex;cell junction;cell part;cell-cell adherens junction;cell-cell junction;cytoplasm;cytoplasmic part;cytoskeletal part;cytoskeleton;extracellular membrane-bounded organelle;extracellular organelle;extracellular region part;extracellular vesicular exosome;intracellular non-membrane-bounded organe…		ASD1;ASD2;PDZ	AAGCAAT,MIR-137;ACCAAAG,MIR-9;ACTIN_BINDING;ACTIN_CYTOSKELETON;ACTIN_CYTOSKELETON_ORGANIZATION_AND_BIOGENESIS;ACTIN_FILAMENT_BASED_PROCESS;ACTIN_FILAMENT_BINDING;ACTIN_FILAMENT_BUNDLE_FORMATION;ACTIN_FILAMENT_ORGANIZATION;ADHERENS_JUNCTION;ANATOMICAL_STRUCTURE_DEVELOPMENT;ANATOMICAL_STRUCTURE_MORPHOGENESIS;APICAL_JUNCTION_COMPLEX;APICAL_PART_OF_CELL;APICAL_PLASMA_MEMBRANE;APICOLATERAL_PLASMA_MEMB…		0.000146177	0.000169492	18	20.2593	20.0423	24.2229	21.2402	20.277	20.138	20.6872	20.9585	4	4	4	4	0.76828	0.0527658	2.07335
A2AN08	Ubr4	UBR4_MOUSE	E3 ubiquitin-protein ligase UBR4	21.6699	21.753	21.6094	21.7912	21.7854	21.7415	21.7859	21.6253	21.7767	21.8571	21.8584	21.849	21.7933	21.8622	21.6567	21.8716						cellular macromolecule metabolic process;cellular metabolic process;cellular process;cellular protein metabolic process;macromolecule metabolic process;macromolecule modification;metabolic process;primary metabolic process;protein metabolic process;protein modification by small protein conjugation;protein modification by small protein conjugation or removal;protein modification process;protein ub…	acid-amino acid ligase activity;binding;catalytic activity;cation binding;ion binding;ligase activity;ligase activity, forming carbon-nitrogen bonds;metal ion binding;small conjugating protein ligase activity;transition metal ion binding;ubiquitin-protein ligase activity;zinc ion binding	cell part;centrosome;cytoplasm;cytoplasmic part;cytoskeletal part;integral to membrane;intracellular non-membrane-bounded organelle;intracellular organelle;intracellular organelle part;intracellular part;intrinsic to membrane;membrane;membrane part;microtubule organizing center;non-membrane-bounded organelle;nuclear part;nucleoplasm;organelle;organelle part		E3_UbLigase_R4;zf-UBR	AACTTT_UNKNOWN;CACGTG_V$MYC_Q2;CAFFAREL_RESPONSE_TO_THC_24HR_5_DN;CAFFAREL_RESPONSE_TO_THC_UP;chr1p36;CONCANNON_APOPTOSIS_BY_EPOXOMICIN_UP;CTTTAAR_UNKNOWN;FULCHER_INFLAMMATORY_RESPONSE_LECTIN_VS_LPS_UP;GAL_LEUKEMIC_STEM_CELL_UP;GGGAGGRR_V$MAZ_Q6;GGGYGTGNY_UNKNOWN;GOLDRATH_NAIVE_VS_EFF_CD8_TCELL_UP;GRADE_COLON_AND_RECTAL_CANCER_UP;GRADE_COLON_CANCER_UP;GSE11057_EFF_MEM_VS_CENT_MEM_CD4_TCELL_DN;GSE…	REACT_343568	0.000146177	0.000169492	90	21.4492	21.8723	23.3443	20.3514	21.7059	21.7345	21.8353	21.7959	4	4	4	4	0.889941	0.438358	1.53502
A2ANU3	Syndig1	SYNG1_MOUSE	Synapse differentiation-inducing gene protein 1	19.9384	20.4982	20.7184	20.8539	20.0004	20.4488	20.0472	17.0574	16.6434	21.2285	20.9473	21.2213	21.0438	20.8095	21.0652	16.1942						biological regulation;cellular component organization;cellular component organization or biogenesis;cellular membrane organization;cellular process;establishment of localization;establishment of localization in cell;establishment of protein localization;intracellular protein transport;intracellular transport;membrane organization;positive regulation of biological process;positive regulation of ce…	binding;glutamate receptor binding;identical protein binding;protein binding;protein dimerization activity;protein homodimerization activity;receptor binding	cell body;cell junction;cell part;cell projection;cell projection part;cytoplasmic part;cytoskeletal part;dendritic shaft;dendritic spine;early endosome membrane;endosomal part;endosome membrane;excitatory synapse;integral to membrane;integral to plasma membrane;intracellular organelle part;intracellular part;intrinsic to membrane;intrinsic to plasma membrane;membrane;membrane part;neuron project…		Dispanin	ATGCTGC,MIR-103,MIR-107;BHAT_ESR1_TARGETS_NOT_VIA_AKT1_UP;BHAT_ESR1_TARGETS_VIA_AKT1_UP;CACTGTG,MIR-128A,MIR-128B;CAGCACT,MIR-512-3P;chr20p11;CTIP_DN.V1_DN;DELYS_THYROID_CANCER_DN;GSE10239_MEMORY_VS_KLRG1INT_EFF_CD8_TCELL_UP;GSE1460_CD4_THYMOCYTE_VS_THYMIC_STROMAL_CELL_DN;GSE1460_INTRATHYMIC_T_PROGENITOR_VS_THYMIC_STROMAL_CELL_DN;GTGCAAT,MIR-25,MIR-32,MIR-92,MIR-363,MIR-367;KRAS.600.LUNG.BREAST_U…		0.000146177	0.000169492	3	19.7209	NaN	NaN	NaN	20.5022	20.1655	21.1324	20.9728	4	3	3	3	0.0686816	0.614435	0.166463
A2AP18	Plch2	PLCH2_MOUSE	1-phosphatidylinositol 4,5-bisphosphate phosphodiesterase eta-2	20.3396	20.3823	20.4279	20.5076	20.6577	20.7051	20.7337	20.6094	20.688	20.5884	20.5359	20.4175	20.6432	20.4686	20.2278	19.7923						biological regulation;catabolic process;cellular lipid metabolic process;cellular metabolic process;cellular process;cellular response to stimulus;glycerolipid metabolic process;glycerophospholipid metabolic process;intracellular signal transduction;lipid catabolic process;lipid metabolic process;metabolic process;organophosphate metabolic process;phosphatidylinositol metabolic process;phospholip…	binding;calcium ion binding;catalytic activity;cation binding;hydrolase activity;hydrolase activity, acting on ester bonds;ion binding;lipase activity;metal ion binding;molecular transducer activity;phosphatidylinositol phospholipase C activity;phospholipase activity;phospholipase C activity;phosphoric diester hydrolase activity;phosphoric ester hydrolase activity;signal transducer activity	cell part;cytoplasm;intracellular part;membrane;plasma membrane		C2;EF-hand_7;EF-hand_like;PI-PLC-X;PI-PLC-Y	ACEVEDO_METHYLATED_IN_LIVER_CANCER_DN;chr1p36;GSE1432_CTRL_VS_IFNG_1H_MICROGLIA_DN;GSE1460_INTRATHYMIC_T_PROGENITOR_VS_DP_THYMOCYTE_DN;GSE22886_NAIVE_CD4_TCELL_VS_12H_ACT_TH1_UP;GSE27786_CD4_TCELL_VS_NKTCELL_DN;GSE27786_LSK_VS_ERYTHROBLAST_DN;GSE27786_NKCELL_VS_ERYTHROBLAST_DN;GSE29615_CTRL_VS_DAY7_LAIV_FLU_VACCINE_PBMC_UP;GSE29615_CTRL_VS_LAIV_FLU_VACCINE_PBMC_UP;GSE30083_SP2_VS_SP4_THYMOCYTE_UP…	REACT_321652	0.000146177	0.000169492	13	20.348	20.2335	NaN	19.9788	20.4143	20.6765	20.5574	20.283	4	4	4	4	1.13208	0.0687378	1.11969
A2APV2	Fmnl2	FMNL2_MOUSE	Formin-like protein 2	19.8049	20.4864	20.4273	20.5168	20.3162	20.6145	20.4771	20.5261	19.2791	20.2924	20.0226	20.3833	20.206	20.2989	20.1272	20.3079						actin cytoskeleton organization;actin filament-based process;biological regulation;cellular component organization;cellular component organization at cellular level;cellular component organization or biogenesis;cellular component organization or biogenesis at cellular level;cellular process;cortical actin cytoskeleton organization;cortical cytoskeleton organization;cytoskeleton organization;organ…		cell part;cytoplasm;intracellular part		Drf_FH3;Drf_GBD;FH2	AAGCAAT,MIR-137;ACACTAC,MIR-142-3P;ACEVEDO_FGFR1_TARGETS_IN_PROSTATE_CANCER_MODEL_UP;ATGTACA,MIR-493;CATTTCA,MIR-203;CHARAFE_BREAST_CANCER_LUMINAL_VS_BASAL_DN;CHARAFE_BREAST_CANCER_LUMINAL_VS_MESENCHYMAL_DN;CHIANG_LIVER_CANCER_SUBCLASS_PROLIFERATION_UP;chr2q23;CUI_TCF21_TARGETS_2_DN;DAIRKEE_TERT_TARGETS_DN;DODD_NASOPHARYNGEAL_CARCINOMA_DN;FOSTER_TOLERANT_MACROPHAGE_DN;FULCHER_INFLAMMATORY_RESPONS…	REACT_358264	0.000146177	0.000169492	14	19.8481	20.4886	22.4118	NaN	20.3089	20.4834	19.9944	20.235	4	4	4	4	0.656306	0.12341	0.471079
A2APX8	Scn1a	SCN1A_MOUSE	Sodium channel protein type 1 subunit alpha	20.0098	20.8346	20.7248	20.6192	20.7139	20.3858	20.2493	20.3262	16.6434	19.7035	19.5398	19.8346	19.5709	20.0822	19.1737	20.8576	+	+				adult behavior;adult locomotory behavior;adult walking behavior;behavior;biological regulation;cation transport;cellular chemical homeostasis;cellular homeostasis;cellular ion homeostasis;cellular process;chemical homeostasis;establishment of localization;homeostatic process;ion homeostasis;ion transmembrane transport;ion transport;locomotory behavior;metal ion transport;monovalent inorganic cati…	cation channel activity;cation transmembrane transporter activity;channel activity;gated channel activity;ion channel activity;ion transmembrane transporter activity;passive transmembrane transporter activity;sodium channel activity;substrate-specific channel activity;substrate-specific transmembrane transporter activity;substrate-specific transporter activity;transmembrane transporter activity;t…	axon;axon part;cation channel complex;cell body;cell junction;cell part;cell projection;cell projection part;cell-cell contact zone;cell-cell junction;initial segment;intercalated disc;ion channel complex;macromolecular complex;membrane;membrane part;neuron projection;neuronal cell body;node of Ranvier;plasma membrane part;protein complex;sodium channel complex;T-tubule;voltage-gated sodium chann…		DUF3451;Ion_trans;Na_trans_assoc	AACTTT_UNKNOWN;ABBUD_LIF_SIGNALING_2_DN;ALK_DN.V1_UP;BLALOCK_ALZHEIMERS_DISEASE_DN;CHESLER_BRAIN_HIGHEST_EXPRESSION;chr2q23;chr2q24;GSE13229_IMM_VS_INTMATURE_NKCELL_UP;GSE1432_CTRL_VS_IFNG_1H_MICROGLIA_DN;GSE14350_IL2RB_KO_VS_WT_TEFF_UP;GSE15930_STIM_VS_STIM_AND_IFNAB_24H_CD8_T_CELL_UP;GSE15930_STIM_VS_STIM_AND_IL-12_72H_CD8_T_CELL_DN;GSE15930_STIM_VS_STIM_AND_TRICHOSTATINA_24H_CD8_T_CELL_DN;GSE1…		0.000146177	0.000169492	7	20.1566	19.942	NaN	NaN	20.5471	20.4188	19.6926	19.9211	4	4	3	4	1.08001	0.0167961	1.06748
A2APY7	Ndufaf5	NDUF5_MOUSE	Arginine-hydroxylase NDUFAF5, mitochondrial	20.3057	20.0621	19.8287	20.3019	19.8494	19.8638	19.7923	19.9773	19.7876	19.7146	19.9191	19.7126	19.6827	19.6996	19.3648	19.6006	+					cellular component assembly;cellular component assembly at cellular level;cellular component biogenesis;cellular component organization;cellular component organization at cellular level;cellular component organization or biogenesis;cellular component organization or biogenesis at cellular level;cellular macromolecular complex assembly;cellular macromolecular complex subunit organization;cellular …	catalytic activity;methyltransferase activity;transferase activity;transferase activity, transferring one-carbon groups	cell part;cytoplasmic part;extrinsic to membrane;extrinsic to mitochondrial inner membrane;extrinsic to organelle membrane;intracellular membrane-bounded organelle;intracellular organelle;intracellular organelle part;intracellular part;membrane part;membrane-bounded organelle;mitochondrial membrane part;mitochondrial part;mitochondrion;organelle;organelle part		Methyltransf_11			0.000146177	0.000169492	5	20.2418	19.783	NaN	20.0387	20.1246	19.8707	19.7835	19.5869	4	4	4	4	2.61838	0.00952595	1.48094
B9EJ86	Osbpl8	OSBL8_MOUSE	Oxysterol-binding protein-related protein 8	20.878	21.2895	20.8893	21.1288	20.9934	21.1929	21.1272	20.953	21.1175	21.1683	21.1004	20.9424	21.0748	20.8108	20.5192	20.502						biological regulation;cell differentiation;cellular developmental process;cellular localization;cellular macromolecule localization;cellular process;cellular protein localization;developmental process;establishment of localization;fat cell differentiation;lipid transport;localization;macromolecule localization;negative regulation of biological process;negative regulation of cell migration;negativ…	binding;cholesterol binding;lipid binding;steroid binding;sterol binding	cell part;intracellular organelle part;intracellular part;membrane;nuclear membrane;nuclear part;organelle membrane;organelle part		Oxysterol_BP;PH	AAGCACT,MIR-520F;AATGTGA,MIR-23A,MIR-23B;AGCACTT,MIR-93,MIR-302A,MIR-302B,MIR-302C,MIR-302D,MIR-372,MIR-373,MIR-520E,MIR-520A,MIR-526B,MIR-520B,MIR-520C,MIR-520D;ATAACCT,MIR-154;ATTCTTT,MIR-186;CATTTCA,MIR-203;CHANG_CORE_SERUM_RESPONSE_DN;CHEN_METABOLIC_SYNDROM_NETWORK;CHICAS_RB1_TARGETS_SENESCENT;chr12q14;CTTTGA_V$LEF1_Q2;CUI_TCF21_TARGETS_2_DN;DACOSTA_UV_RESPONSE_VIA_ERCC3_COMMON_DN;DACOSTA_UV_…		0.000146177	0.000169492	13	20.9492	21.3992	23.1015	NaN	21.0464	21.0666	21.0821	20.7267	4	4	4	4	1.27179	0.0580878	0.12024
A2AQ25	Skt	SKT_MOUSE	Sickle tail protein	20.5171	20.2559	20.2184	20.6079	20.0446	20.0225	20.1092	20.165	19.7022	19.6732	19.8554	19.4561	19.4642	19.7062	18.884	19.642	+	+	+			anatomical structure development;developmental process;embryonic skeletal system development;skeletal system development;system development		cell part;cytoplasm;intracellular part					0.000146177	0.000169492	16	20.4876	19.8907	23.0053	19.5124	20.3998	20.0853	19.6717	19.4241	4	4	4	4	3.55531	0.00185417	2.92243
A2AR02	Ppig	PPIG_MOUSE	Peptidyl-prolyl cis-trans isomerase G	21.6098	21.3314	21.4399	21.529	21.6532	21.8058	21.6346	21.8162	21.855	21.709	21.8715	21.883	21.8352	21.713	21.5409	21.1166		+				cellular macromolecule metabolic process;cellular metabolic process;cellular process;cellular protein metabolic process;macromolecule metabolic process;macromolecule modification;metabolic process;peptidyl-amino acid modification;peptidyl-proline modification;primary metabolic process;protein folding;protein metabolic process;protein modification process;protein peptidyl-prolyl isomerization	catalytic activity;cis-trans isomerase activity;isomerase activity;peptidyl-prolyl cis-trans isomerase activity	cell part;cytoplasm;intracellular organelle part;intracellular part;nuclear body;nuclear matrix;nuclear part;nuclear speck;nucleoplasm;nucleoplasm part;organelle part		Pro_isomerase	ACEVEDO_LIVER_TUMOR_VS_NORMAL_ADJACENT_TISSUE_DN;BIOPOLYMER_METABOLIC_PROCESS;BLALOCK_ALZHEIMERS_DISEASE_INCIPIENT_UP;BLALOCK_ALZHEIMERS_DISEASE_UP;CHEN_HOXA5_TARGETS_9HR_UP;CHICAS_RB1_TARGETS_GROWING;chr2q31;CYCLIN_D1_KE_.V1_DN;CYCLIN_D1_UP.V1_DN;DRUG_BINDING;ENK_UV_RESPONSE_KERATINOCYTE_DN;GARY_CD5_TARGETS_DN;GAUSSMANN_MLL_AF4_FUSION_TARGETS_E_UP;GCM_BMPR2;GCM_GSPT1;GCM_GSTA4;GCM_MAP4K4;GCM_MLL…		0.000146177	0.000169492	6	21.7263	21.6186	NaN	21.8918	21.4775	21.7274	21.8296	21.5514	4	4	4	4	1.21049	0.0687082	2.55453
A2ARP1	Ppip5k1	VIP1_MOUSE	Inositol hexakisphosphate and diphosphoinositol-pentakisphosphate kinase 1	19.3827	19.3443	19.3265	16.907	18.5874	17.0522	18.7853	18.7312	16.6434	18.7456	18.6571	19.1769	18.7787	18.7815	18.4668	19.1659						alcohol metabolic process;carbohydrate metabolic process;cellular carbohydrate metabolic process;cellular metabolic process;cellular process;inositol metabolic process;metabolic process;polyol metabolic process;primary metabolic process;small molecule metabolic process	acid phosphatase activity;adenyl nucleotide binding;adenyl ribonucleotide binding;ATP binding;binding;catalytic activity;diphosphoinositol-pentakisphosphate kinase activity;hydrolase activity;hydrolase activity, acting on ester bonds;inositol 1,3,4,5,6-pentakisphosphate kinase activity;inositol hexakisphosphate 1-kinase activity;inositol hexakisphosphate 3-kinase activity;inositol hexakisphosphat…	cell part;cytoplasm;cytoplasmic part;cytosol;intracellular organelle part;intracellular part;membrane;nuclear part;nucleoplasm;organelle part;plasma membrane		His_Phos_2	CADWELL_ATG16L1_TARGETS_DN;CAGGGTC,MIR-504;chr15q15;DODD_NASOPHARYNGEAL_CARCINOMA_UP;GATTGGY_V$NFY_Q6_01;GAZDA_DIAMOND_BLACKFAN_ANEMIA_ERYTHROID_DN;GSE11924_TH1_VS_TH17_CD4_TCELL_DN;GSE13306_TREG_RA_VS_TCONV_RA_DN;GSE14308_INDUCED_VS_NATURAL_TREG_UP;GSE14308_TH1_VS_INDUCED_TREG_DN;GSE14308_TH17_VS_INDUCED_TREG_DN;GSE14308_TH2_VS_INDUCED_TREG_DN;GSE1460_CD4_THYMOCYTE_VS_NAIVE_CD4_TCELL_ADULT_BLOOD…	REACT_316421	0.000146177	0.000169492	7	19.2514	NaN	NaN	NaN	19.3511	18.7013	18.8598	18.7982	3	3	3	4	0.0978133	0.558006	0.207178
A2ASQ1	Agrn	AGRIN_MOUSE	Agrin	21.3029	21.4025	21.3158	21.494	21.6171	21.8157	21.8276	21.8195	20.9905	21.0364	20.9793	20.9619	20.9522	21.0707	20.5574	20.9224	+	+	+			biological regulation;cell communication;cell differentiation;cell-cell signaling;cellular component organization;cellular component organization or biogenesis;cellular developmental process;cellular localization;cellular macromolecule localization;cellular macromolecule metabolic process;cellular membrane organization;cellular metabolic process;cellular process;cellular protein localization;deve…	acetylcholine receptor regulator activity;ATPase inhibitor activity;ATPase regulator activity;binding;calcium ion binding;carbohydrate binding;cation binding;chondroitin sulfate binding;dystroglycan binding;enzyme inhibitor activity;enzyme regulator activity;glycoprotein binding;glycosaminoglycan binding;heparan sulfate proteoglycan binding;ion binding;ion channel binding;metal ion binding;monosa…	basal lamina;basement membrane;cell junction;cell part;cell surface;cytoplasm;cytoplasmic part;extracellular matrix;extracellular matrix part;extracellular membrane-bounded organelle;extracellular organelle;extracellular region;extracellular region part;extracellular space;extracellular vesicular exosome;Golgi apparatus part;Golgi lumen;integral to membrane;intracellular organelle lumen;intracell…		EGF;Kazal_1;Kazal_2;Laminin_EGF;Laminin_G_1;SEA	ACTGTGA,MIR-27A,MIR-27B;ALFANO_MYC_TARGETS;AMIT_EGF_RESPONSE_480_HELA;AMUNDSON_POOR_SURVIVAL_AFTER_GAMMA_RADIATION_2G;ANATOMICAL_STRUCTURE_DEVELOPMENT;ATACTGT,MIR-144;BAELDE_DIABETIC_NEPHROPATHY_DN;BASAL_LAMINA;BASEMENT_MEMBRANE;BENNETT_SYSTEMIC_LUPUS_ERYTHEMATOSUS;BLALOCK_ALZHEIMERS_DISEASE_UP;BMI1_DN.V1_UP;BRUINS_UVC_RESPONSE_LATE;BRUINS_UVC_RESPONSE_VIA_TP53_GROUP_A;BRUINS_UVC_RESPONSE_VIA_TP5…	REACT_295031;REACT_319054;REACT_319261;REACT_320075;REACT_324389;REACT_326072;REACT_343711;REACT_354321	0.000146177	0.000169492	23	21.5989	21.7889	20.7734	21.3124	21.3788	21.77	20.992	20.8757	4	4	4	4	5.70732	0.000290323	3.75541
A2ASZ8	Slc25a25	SCMC2_MOUSE	Calcium-binding mitochondrial carrier protein SCaMC-2	21.6109	22.5284	21.9499	21.8766	21.8152	21.8839	21.8619	21.9478	21.1822	22.0045	21.6944	21.8495	21.9444	22.1718	21.3479	22.2453						adipose tissue development;anatomical structure development;ATP metabolic process;calcium ion transmembrane transport;calcium ion transport;camera-type eye development;cation transport;cellular metabolic process;cellular nitrogen compound metabolic process;cellular process;cellular respiration;developmental process;divalent inorganic cation transport;divalent metal ion transport;energy derivation…	binding;calcium ion binding;cation binding;ion binding;metal ion binding	cell part;cytoplasmic part;extracellular membrane-bounded organelle;extracellular organelle;extracellular region part;extracellular vesicular exosome;integral to membrane;intracellular membrane-bounded organelle;intracellular organelle;intracellular organelle part;intracellular part;intrinsic to membrane;membrane;membrane part;membrane-bounded organelle;membrane-bounded vesicle;mitochondrial inne…		EF-hand_7;Mito_carr	AACTGGA,MIR-145;ACATTCC,MIR-1,MIR-206;BHAT_ESR1_TARGETS_VIA_AKT1_UP;BOCHKIS_FOXA2_TARGETS;BURTON_ADIPOGENESIS_1;CAATGCA,MIR-33;chr9q34;CRX_DN.V1_UP;CRX_NRL_DN.V1_UP;GARGALOVIC_RESPONSE_TO_OXIDIZED_PHOSPHOLIPIDS_TURQUOISE_UP;GGGACCA,MIR-133A,MIR-133B;GRAESSMANN_APOPTOSIS_BY_DOXORUBICIN_UP;GSE10856_CTRL_VS_TNFRSF6B_IN_MACROPHAGE_DN;GSE11924_TH1_VS_TH17_CD4_TCELL_UP;GSE14769_UNSTIM_VS_40MIN_LPS_BMDM…		0.000146177	0.000169492	12	20.7011	21.7525	21.9891	19.5412	21.9915	21.8772	21.6827	21.9274	4	4	4	4	0.217884	0.457677	0.545364
A2AT37	Upf2	RENT2_MOUSE	Regulator of nonsense transcripts 2	19.5046	19.5623	19.3277	19.3841	19.5413	19.3709	19.7703	19.5186	19.5225	19.4392	19.2659	19.2647	19.4872	19.0799	18.6463	19.3246						anatomical structure development;anatomical structure morphogenesis;catabolic process;cellular catabolic process;cellular macromolecule catabolic process;cellular macromolecule metabolic process;cellular metabolic process;cellular nitrogen compound metabolic process;cellular process;developmental process;liver development;macromolecule catabolic process;macromolecule metabolic process;metabolic p…	binding;nucleic acid binding;RNA binding	cell part;cytoplasm;cytoplasmic part;exon-exon junction complex;intracellular membrane-bounded organelle;intracellular organelle;intracellular organelle part;intracellular part;macromolecular complex;membrane-bounded organelle;nuclear part;nucleus;organelle;organelle part;perinuclear region of cytoplasm;protein complex	mRNA surveillance pathway;RNA transport	MIF4G;Upf2	BIOPOLYMER_CATABOLIC_PROCESS;BIOPOLYMER_METABOLIC_PROCESS;BROWNE_HCMV_INFECTION_14HR_UP;BUYTAERT_PHOTODYNAMIC_THERAPY_STRESS_UP;CATABOLIC_PROCESS;CELLULAR_CATABOLIC_PROCESS;CELLULAR_LOCALIZATION;CELLULAR_MACROMOLECULE_CATABOLIC_PROCESS;chr10p14;CYTOPLASM;DACOSTA_UV_RESPONSE_VIA_ERCC3_COMMON_DN;DACOSTA_UV_RESPONSE_VIA_ERCC3_DN;EIF4E_DN;ESTABLISHMENT_OF_CELLULAR_LOCALIZATION;ESTABLISHMENT_OF_LOCALI…	REACT_279505	0.000146177	0.000169492	9	19.4607	19.8877	21.7113	19.2591	19.4447	19.5503	19.3731	19.1345	4	4	4	4	1.00903	0.0780715	0.36997
A2AWA9	Rabgap1	RBGP1_MOUSE	Rab GTPase-activating protein 1	21.6202	21.6936	21.555	21.6892	21.8144	21.6148	21.7777	21.6836	21.9055	21.8242	21.7587	21.7967	22.0148	21.9021	21.6449	21.9511						biological regulation;cell cycle;cellular process;positive regulation of catalytic activity;positive regulation of GTPase activity;positive regulation of hydrolase activity;positive regulation of molecular function;regulation of biological process;regulation of catabolic process;regulation of catalytic activity;regulation of cellular catabolic process;regulation of cellular metabolic process;regu…	binding;enzyme activator activity;enzyme binding;enzyme regulator activity;GTPase activator activity;GTPase binding;GTPase regulator activity;nucleoside-triphosphatase regulator activity;protein binding;Rab GTPase binding;Ras GTPase binding;small GTPase binding	cell part;cytoplasmic part;cytoskeletal part;cytosol;intracellular organelle part;intracellular part;microtubule organizing center;organelle part		DUF3694;PID;RabGAP-TBC	AACTTT_UNKNOWN;AAGCACT,MIR-520F;AGCACTT,MIR-93,MIR-302A,MIR-302B,MIR-302C,MIR-302D,MIR-372,MIR-373,MIR-520E,MIR-520A,MIR-526B,MIR-520B,MIR-520C,MIR-520D;BERTUCCI_MEDULLARY_VS_DUCTAL_BREAST_CANCER_DN;BLALOCK_ALZHEIMERS_DISEASE_UP;BOQUEST_STEM_CELL_CULTURED_VS_FRESH_UP;BOYAULT_LIVER_CANCER_SUBCLASS_G1_UP;BUYTAERT_PHOTODYNAMIC_THERAPY_STRESS_UP;CACGTG_V$MYC_Q2;CACTTTG,MIR-520G,MIR-520H;CAGTGTT,MIR-1…		0.000146177	0.000169492	26	21.4277	21.4303	23.6681	21.756	21.6395	21.7226	21.8213	21.8782	4	4	4	4	1.51791	0.114517	2.15757
A2AWP8	Arhgef10l	ARGAL_MOUSE	Rho guanine nucleotide exchange factor 10-like protein	20.3588	20.041	20.0862	20.0845	20.209	20.2103	20.1855	20.2926	20.162	20.3683	20.3394	20.0675	20.2016	20.1605	19.7692	19.9957							enzyme regulator activity;GTPase regulator activity;guanyl-nucleotide exchange factor activity;nucleoside-triphosphatase regulator activity;Ras guanyl-nucleotide exchange factor activity;Rho guanyl-nucleotide exchange factor activity;small GTPase regulator activity	cell part;cytoplasm;intracellular part		RhoGEF	ACTGCCT,MIR-34B;ACTIN_CYTOSKELETON_ORGANIZATION_AND_BIOGENESIS;ACTIN_FILAMENT_BASED_PROCESS;ACTIN_FILAMENT_BUNDLE_FORMATION;ACTIN_FILAMENT_ORGANIZATION;ATGCTGG,MIR-338;BIOPOLYMER_METABOLIC_PROCESS;BRUINS_UVC_RESPONSE_VIA_TP53_GROUP_D;CHIANG_LIVER_CANCER_SUBCLASS_UNANNOTATED_UP;chr1p36;CYTOPLASM;CYTOPLASMIC_PART;CYTOSKELETON_ORGANIZATION_AND_BIOGENESIS;CYTOSOL;ENZYME_ACTIVATOR_ACTIVITY;ENZYME_REGU…		0.000146177	0.000169492	7	20.1547	20.2762	NaN	20.31	20.1426	20.2243	20.2343	20.0317	4	4	4	4	0.659272	0.308191	0.39264
A2BDX3	Mocs3	MOCS3_MOUSE	Adenylyltransferase and sulfurtransferase MOCS3	20.7708	20.4107	20.439	20.3965	20.7651	20.8526	20.47	20.8512	20.8616	16.8503	20.7058	20.9896	20.5786	20.6502	20.6292	20.603						aromatic compound biosynthetic process;biosynthetic process;cellular aromatic compound metabolic process;cellular biosynthetic process;cellular macromolecule metabolic process;cellular metabolic process;cellular nitrogen compound biosynthetic process;cellular nitrogen compound metabolic process;cellular process;cellular protein metabolic process;coenzyme biosynthetic process;coenzyme metabolic pr…	adenyl nucleotide binding;adenyl ribonucleotide binding;adenylyltransferase activity;ATP binding;binding;catalytic activity;cation binding;ion binding;metal ion binding;nucleotide binding;nucleotidyltransferase activity;protein adenylyltransferase activity;purine nucleotide binding;purine ribonucleoside triphosphate binding;purine ribonucleotide binding;ribonucleotide binding;small protein activa…	cell part;cytoplasmic part;cytosol;intracellular part	Sulfur relay system	MoeZ_MoeB;Rhodanese;ThiF	BENPORATH_MYC_MAX_TARGETS;BROWNE_HCMV_INFECTION_48HR_DN;BROWNE_HCMV_INFECTION_4HR_DN;chr20q13;DANG_BOUND_BY_MYC;GGAANCGGAANY_UNKNOWN;GSE13411_NAIVE_VS_IGM_MEMORY_BCELL_DN;GSE14026_TH1_VS_TH17_UP;GSE17974_0H_VS_24H_IN_VITRO_ACT_CD4_TCELL_DN;GSE18148_CBFB_KO_VS_WT_TREG_UP;GSE20151_CTRL_VS_FUSOBACT_NUCLEATUM_NEUTROPHIL_UP;GSE32423_CTRL_VS_IL7_IL4_MEMORY_CD8_TCELL_DN;GSE3982_BASOPHIL_VS_EFF_MEMORY_CD…	REACT_298894	0.000146177	0.000169492	4	20.2053	20.2168	NaN	20.6703	20.5042	20.7347	20.8524	20.6152	4	4	3	4	0.206646	0.331988	0.267021
A2BE28	Las1l	LAS1L_MOUSE	Ribosomal biogenesis protein LAS1L	16.7211	16.8303	16.8675	16.907	16.7711	19.0338	18.7822	18.9111	19.574	19.6378	19.3641	19.8089	19.5194	19.2702	19.957	19.3482	+	+	+			cellular macromolecule metabolic process;cellular metabolic process;cellular nitrogen compound metabolic process;cellular process;macromolecule metabolic process;metabolic process;ncRNA metabolic process;ncRNA processing;nitrogen compound metabolic process;nucleic acid metabolic process;nucleobase-containing compound metabolic process;primary metabolic process;RNA metabolic process;RNA processing…		cell part;cytoplasm;cytoplasmic part;cytoskeletal part;histone methyltransferase complex;intracellular non-membrane-bounded organelle;intracellular organelle;intracellular organelle part;intracellular part;macromolecular complex;membrane;methyltransferase complex;microtubule organizing center;MLL1 complex;non-membrane-bounded organelle;nuclear part;nucleolus;nucleoplasm;nucleoplasm part;organelle…		Las1	ACAACCT,MIR-453;ACOSTA_PROLIFERATION_INDEPENDENT_MYC_TARGETS_UP;ATF2_S_UP.V1_UP;ATF2_UP.V1_UP;BRUINS_UVC_RESPONSE_VIA_TP53_GROUP_A;CAGGTA_V$AREB6_01;chrxq12;GENTILE_UV_LOW_DOSE_DN;GNF2_ELAC2;GNF2_KPNB1;GNF2_MCM5;GNF2_SMC1L1;GSE10325_LUPUS_BCELL_VS_LUPUS_MYELOID_UP;GSE11057_NAIVE_CD4_VS_PBMC_CD4_TCELL_UP;GSE11864_CSF1_PAM3CYS_VS_CSF1_IFNG_PAM3CYS_IN_MAC_UP;GSE13306_RA_VS_UNTREATED_TREG_UP;GSE14308…		0.000146177	0.000169492	6	NaN	NaN	NaN	19.1599	NaN	18.909	19.5962	19.5237	0	3	4	4	4.31974	5.7971e-05	6.82403
A2BH40	Arid1a	ARI1A_MOUSE	AT-rich interactive domain-containing protein 1A	20.4391	20.0554	20.0671	20.2616	20.473	20.4387	20.2866	20.3615	20.5478	20.8071	20.6682	20.7032	20.6302	20.3598	20.4294	19.9347	+	+				anatomical structure development;anatomical structure formation involved in morphogenesis;androgen receptor signaling pathway;ATP-dependent chromatin remodeling;biological regulation;biosynthetic process;blood vessel development;cardiac cell differentiation;cardiac chamber development;cardiac muscle cell differentiation;cell differentiation;cellular biosynthetic process;cellular component disasse…	binding;DNA binding;ligand-dependent nuclear receptor binding;nucleic acid binding;protein binding;receptor binding	cell part;chromatin;chromatin remodeling complex;chromosomal part;intracellular organelle part;intracellular part;macromolecular complex;nBAF complex;npBAF complex;nuclear chromatin;nuclear chromosome part;nuclear part;nucleoplasm;organelle part;protein complex;SWI/SNF complex;SWI/SNF-type complex		ARID;DUF3518	AAAYRNCTG_UNKNOWN;AACTTT_UNKNOWN;ACACTGG,MIR-199A,MIR-199B;ACCAAAG,MIR-9;AGCTCCT,MIR-28;AGGGCAG,MIR-18A;ANDROGEN_RECEPTOR_SIGNALING_PATHWAY;ATAAGCT,MIR-21;ATACTGT,MIR-144;ATGTACA,MIR-493;ATGTAGC,MIR-221,MIR-222;BENPORATH_EED_TARGETS;BIOPOLYMER_METABOLIC_PROCESS;BLALOCK_ALZHEIMERS_DISEASE_INCIPIENT_UP;BLALOCK_ALZHEIMERS_DISEASE_UP;BRUINS_UVC_RESPONSE_EARLY_LATE;BURTON_ADIPOGENESIS_12;BYSTRYKH_HEMA…	REACT_319868	0.000146177	0.000169492	18	20.466	19.9177	21.5187	20.9938	20.2058	20.3899	20.6816	20.3385	4	4	4	4	1.667	0.0271064	2.39032
A2CG49	Kalrn	KALRN_MOUSE	Kalirin	20.1519	20.3044	20.4175	20.4448	19.6263	19.2799	16.7683	17.0574	20.6066	20.6112	20.9654	20.332	20.5322	20.0591	20.0615	20.8235	+		+			biological regulation;positive regulation of catalytic activity;positive regulation of GTPase activity;positive regulation of hydrolase activity;positive regulation of molecular function;regulation of biological process;regulation of catabolic process;regulation of catalytic activity;regulation of cellular catabolic process;regulation of cellular metabolic process;regulation of cellular process;r…	adenyl nucleotide binding;adenyl ribonucleotide binding;ATP binding;binding;catalytic activity;cation binding;enzyme regulator activity;GTPase regulator activity;guanyl-nucleotide exchange factor activity;ion binding;kinase activity;metal ion binding;nucleoside-triphosphatase regulator activity;nucleotide binding;phosphotransferase activity, alcohol group as acceptor;protein kinase activity;prote…	cell part;cytoplasm;cytoskeleton;extracellular membrane-bounded organelle;extracellular organelle;extracellular region part;extracellular vesicular exosome;intracellular non-membrane-bounded organelle;intracellular organelle;intracellular part;membrane-bounded organelle;membrane-bounded vesicle;non-membrane-bounded organelle;organelle;vesicle		CRAL_TRIO_2;fn3;I-set;Pkinase;RhoGEF;SH3_1;Spectrin	AAGCACA,MIR-218;AAGCCAT,MIR-135A,MIR-135B;AATGGAG,MIR-136;ACCAAAG,MIR-9;ACEVEDO_METHYLATED_IN_LIVER_CANCER_DN;ACTIN_CYTOSKELETON;ANATOMICAL_STRUCTURE_DEVELOPMENT;BIOPOLYMER_METABOLIC_PROCESS;BIOPOLYMER_MODIFICATION;BLALOCK_ALZHEIMERS_DISEASE_DN;BROWNE_HCMV_INFECTION_30MIN_DN;CAGTGTT,MIR-141,MIR-200A;CELLULAR_MACROMOLECULE_METABOLIC_PROCESS;CELLULAR_PROTEIN_METABOLIC_PROCESS;chr3q21;CHYLA_CBFA2T3_…	REACT_289095;REACT_297947;REACT_299052;REACT_313804;REACT_347934	0.000146177	0.000169492	13	19.6806	20.2876	24.5359	20.4228	20.3297	19.4531	20.6288	20.3691	4	2	4	4	2.58902	0.00166667	1.06462
A2RSJ4	Uhrf1bp1l	UH1BL_MOUSE	UHRF1-binding protein 1-like	19.5543	19.2015	19.5291	19.4824	19.6047	19.3955	19.534	19.2326	19.5991	19.7671	19.8253	19.8172	19.795	19.8249	19.5312	19.6926	+									Chorein_N	AAGTCCA,MIR-422B,MIR-422A;chr12q23;ESC_J1_UP_EARLY.V1_DN;GSE10094_LCMV_VS_LISTERIA_IND_EFF_CD4_TCELL_UP;GSE13738_RESTING_VS_BYSTANDER_ACTIVATED_CD4_TCELL_DN;GSE13738_RESTING_VS_TCR_ACTIVATED_CD4_TCELL_DN;GSE14350_IL2RB_KO_VS_WT_TEFF_UP;GSE14769_40MIN_VS_360MIN_LPS_BMDM_UP;GSE17580_TREG_VS_TEFF_DN;GSE17721_POLYIC_VS_CPG_2H_BMDM_UP;GSE17721_POLYIC_VS_CPG_6H_BMDM_UP;GSE17721_POLYIC_VS_GARDIQUIMOD_12…		0.000146177	0.000169492	14	19.3784	NaN	22.2131	20.027	19.4418	19.4417	19.7522	19.7109	4	4	4	4	1.88546	0.031013	1.73031
A2RSQ0	Dennd5b	DEN5B_MOUSE	DENN domain-containing protein 5B	19.1401	19.2434	19.6101	19.4572	19.9863	17.0522	18.8733	17.0574	19.1651	19.333	19.326	19.1754	19.2412	19.4173	18.5242	19.0644						biological regulation;positive regulation of catalytic activity;positive regulation of GTPase activity;positive regulation of hydrolase activity;positive regulation of molecular function;regulation of biological process;regulation of catabolic process;regulation of catalytic activity;regulation of cellular catabolic process;regulation of cellular metabolic process;regulation of cellular process;r…	enzyme regulator activity;GTPase regulator activity;guanyl-nucleotide exchange factor activity;nucleoside-triphosphatase regulator activity;Rab guanyl-nucleotide exchange factor activity;Ras guanyl-nucleotide exchange factor activity;small GTPase regulator activity	cell part;integral to membrane;intrinsic to membrane;membrane;membrane part		dDENN;DENN;PLAT;RUN;uDENN	ACEVEDO_LIVER_TUMOR_VS_NORMAL_ADJACENT_TISSUE_UP;BAKKER_FOXO3_TARGETS_UP;chr12p11;GARGALOVIC_RESPONSE_TO_OXIDIZED_PHOSPHOLIPIDS_YELLOW_DN;GSE14350_TREG_VS_TEFF_DN;GSE1460_DP_THYMOCYTE_VS_THYMIC_STROMAL_CELL_DN;GSE17974_IL4_AND_ANTI_IL12_VS_UNTREATED_0.5H_ACT_CD4_TCELL_DN;GSE19825_NAIVE_VS_IL2RAHIGH_DAY3_EFF_CD8_TCELL_UP;GSE29614_CTRL_VS_DAY7_TIV_FLU_VACCINE_PBMC_DN;GSE29614_CTRL_VS_TIV_FLU_VACCIN…		0.000146177	0.000169492	7	18.5982	NaN	NaN	18.4568	19.3627	19.4298	19.2499	19.0618	4	2	4	4	0.695178	0.0518269	0.437247
Q91W39	Ncoa5	NCOA5_MOUSE	Nuclear receptor coactivator 5	21.7553	21.4081	21.5624	21.613	21.7737	21.8461	21.6978	21.8587	22.1229	22.0164	22.0788	22.0958	21.9311	21.7296	21.8037	21.1631	+	+				biological regulation;biosynthetic process;carbohydrate homeostasis;cellular biosynthetic process;cellular macromolecule biosynthetic process;cellular macromolecule metabolic process;cellular metabolic process;cellular nitrogen compound metabolic process;cellular process;chemical homeostasis;glucose homeostasis;homeostatic process;macromolecule biosynthetic process;macromolecule metabolic process…	binding;chromatin binding	actin cytoskeleton;cell part;cytoskeleton;extracellular region part;extracellular space;intracellular membrane-bounded organelle;intracellular non-membrane-bounded organelle;intracellular organelle;intracellular organelle part;intracellular part;membrane-bounded organelle;non-membrane-bounded organelle;nuclear part;nucleoplasm;nucleus;organelle;organelle part			AAAYWAACM_V$HFH4_01;AACTTT_UNKNOWN;ACTGTGA,MIR-27A,MIR-27B;BENPORATH_CYCLING_GENES;CAGGTG_V$E12_Q6;chr20q12;CTTTGT_V$LEF1_Q2;DOUGLAS_BMI1_TARGETS_UP;GCM_DFFA;GCM_FANCL;GCM_MLL;GCM_MYST2;GCM_RBM8A;GCM_SUFU;GCM_UBE2N;GCM_ZNF198;GGCNKCCATNK_UNKNOWN;GGGACCA,MIR-133A,MIR-133B;GGGCGGR_V$SP1_Q6;GSE13306_RA_VS_UNTREATED_TCONV_UP;GSE13306_RA_VS_UNTREATED_TREG_UP;GSE15324_ELF4_KO_VS_WT_ACTIVATED_CD8_TCELL_…		0.000146177	0.000169492	18	22.1183	21.2006	NaN	22.1088	21.5847	21.7941	22.0785	21.6569	4	4	4	4	1.83252	0.0198603	3.22613
Q922D4	Ppp6r3	PP6R3_MOUSE	Serine/threonine-protein phosphatase 6 regulatory subunit 3	21.9788	21.6133	21.7574	21.9265	21.9174	22.0374	21.76	21.8454	22.3328	21.9596	22.0705	21.8554	21.9134	21.8077	21.5804	21.4035						biological regulation;regulation of biological process;regulation of catalytic activity;regulation of cellular metabolic process;regulation of cellular process;regulation of dephosphorylation;regulation of hydrolase activity;regulation of metabolic process;regulation of molecular function;regulation of phosphatase activity;regulation of phosphate metabolic process;regulation of phosphoprotein pho…	binding;enzyme binding;phosphatase binding;protein binding;protein phosphatase binding	cell part;cytoplasm;intracellular organelle part;intracellular part;membrane;nuclear part;nucleoplasm;organelle part;plasma membrane		SAPS	AAAGGAT,MIR-501;AAGCCAT,MIR-135A,MIR-135B;ACCAAAG,MIR-9;ACTGCAG,MIR-17-3P;BENPORATH_CYCLING_GENES;BLALOCK_ALZHEIMERS_DISEASE_UP;BRUINS_UVC_RESPONSE_LATE;CAGTATT,MIR-200B,MIR-200C,MIR-429;CATGTAA,MIR-496;CCTGTGA,MIR-513;chr11q13;CREIGHTON_ENDOCRINE_THERAPY_RESISTANCE_2;CTCTGGA,MIR-520A,MIR-525;ENZYME_BINDING;GACAGGG,MIR-339;GCACTTT,MIR-17-5P,MIR-20A,MIR-106A,MIR-106B,MIR-20B,MIR-519D;GRAESSMANN_AP…		0.000146177	0.000169492	13	22.0574	22.1597	22.8805	22.1835	21.819	21.8901	22.0545	21.6762	4	4	4	4	1.10718	0.0815033	0.903061
A3KFX0	Nt5c1a	5NT1A_MOUSE	Cytosolic 5'-nucleotidase 1A	19.6718	19.3636	19.3955	19.5974	19.586	19.6958	19.3414	19.9746	19.6065	20.2259	19.6228	20.0297	20.117	20.0329	19.698	18.5891						adenosine metabolic process;catabolic process;cellular catabolic process;cellular metabolic process;cellular nitrogen compound catabolic process;cellular nitrogen compound metabolic process;cellular process;dephosphorylation;heterocycle catabolic process;heterocycle metabolic process;metabolic process;nitrogen compound metabolic process;nucleobase-containing compound catabolic process;nucleobase-…	5'-nucleotidase activity;binding;catalytic activity;cation binding;hydrolase activity;hydrolase activity, acting on ester bonds;ion binding;magnesium ion binding;metal ion binding;nucleotidase activity;nucleotide binding;phosphatase activity;phosphoric ester hydrolase activity	cell part;cytoplasm;intracellular part	Nicotinate and nicotinamide metabolism;Purine metabolism;Pyrimidine metabolism	5-nucleotidase	BENPORATH_EED_TARGETS;BENPORATH_ES_WITH_H3K27ME3;BENPORATH_PRC2_TARGETS;BENPORATH_SUZ12_TARGETS;chr1p34;CTTTAAR_UNKNOWN;GGGAGGRR_V$MAZ_Q6;KEGG_NICOTINATE_AND_NICOTINAMIDE_METABOLISM;KEGG_PURINE_METABOLISM;KEGG_PYRIMIDINE_METABOLISM;LI_CYTIDINE_ANALOG_PATHWAY;MARTENS_TRETINOIN_RESPONSE_UP;REACTOME_METABOLISM_OF_NUCLEOTIDES;REACTOME_PURINE_CATABOLISM;REACTOME_PURINE_METABOLISM;REACTOME_PYRIMIDINE_C…	REACT_277717;REACT_317918	0.000146177	0.000169492	8	19.163	19.0169	NaN	20.0911	19.5071	19.6494	19.8712	19.6092	4	4	4	4	0.1834	0.472308	1.11195
A3KGB4	Tbc1d8b	TBC8B_MOUSE	TBC1 domain family member 8B	18.7906	18.5817	18.3275	18.6674	18.0964	17.0522	18.1044	17.0574	16.6434	16.8503	16.844	16.6663	16.8004	16.5422	16.367	16.1942	+	+	+				binding;calcium ion binding;cation binding;enzyme activator activity;enzyme regulator activity;GTPase activator activity;GTPase regulator activity;ion binding;metal ion binding;nucleoside-triphosphatase regulator activity			GRAM;RabGAP-TBC	AAANWWTGC_UNKNOWN;AACTTT_UNKNOWN;AACWWCAANK_UNKNOWN;AAGCACA,MIR-218;ACTAYRNNNCCCR_UNKNOWN;AGCACTT,MIR-93,MIR-302A,MIR-302B,MIR-302C,MIR-302D,MIR-372,MIR-373,MIR-520E,MIR-520A,MIR-526B,MIR-520B,MIR-520C,MIR-520D;BIDUS_METASTASIS_DN;BRUINS_UVC_RESPONSE_VIA_TP53_GROUP_A;chrxq22;COLDREN_GEFITINIB_RESISTANCE_DN;CTCTAGA,MIR-526C,MIR-518F,MIR-526A;CTTTGA_V$LEF1_Q2;CTTTGT_V$LEF1_Q2;GCACTTT,MIR-17-5P,MIR-…	REACT_342454	0.000146177	0.000169492	4	18.5385	NaN	NaN	NaN	18.5918	18.1004	NaN	NaN	4	2	0	0	5.13566	0	5.47391
A3KMP2	Ttc38	TTC38_MOUSE	Tetratricopeptide repeat protein 38	20.2283	19.7211	19.7046	19.8328	19.9789	19.9542	19.9442	20.3325	16.6434	20.2854	20.1374	19.8478	19.9585	19.9365	19.5621	20.2047								extracellular membrane-bounded organelle;extracellular organelle;extracellular region part;extracellular vesicular exosome;membrane-bounded organelle;membrane-bounded vesicle;organelle;vesicle			AGGGCCA,MIR-328;ALK_DN.V1_DN;BENPORATH_CYCLING_GENES;BOYAULT_LIVER_CANCER_SUBCLASS_G3_DN;CHANG_IMMORTALIZED_BY_HPV31_UP;chr22q13;DODD_NASOPHARYNGEAL_CARCINOMA_UP;GNF2_IL2RB;GNF2_PTPN4;GSE10239_KLRG1INT_VS_KLRG1HIGH_EFF_CD8_TCELL_DN;GSE12845_IGD_POS_VS_NEG_BLOOD_BCELL_DN;GSE13229_IMM_VS_MATURE_NKCELL_DN;GSE1432_CTRL_VS_IFNG_1H_MICROGLIA_UP;GSE17974_IL4_AND_ANTI_IL12_VS_UNTREATED_48H_ACT_CD4_TCELL_…		0.000146177	0.000169492	3	19.6708	NaN	NaN	NaN	19.8717	20.0525	20.0902	19.9154	4	4	3	4	0.236208	0.301283	0.309779
A4FUP9	Glt1d1	GL1D1_MOUSE	Glycosyltransferase 1 domain-containing protein 1	19.8553	19.4601	19.44	19.3566	19.4123	19.361	19.3135	19.3041	19.7975	19.3824	19.2867	19.2158	19.328	19.0716	18.7896	19.1872						biosynthetic process;metabolic process	catalytic activity;transferase activity;transferase activity, transferring glycosyl groups	cell part;cytoplasm;extracellular region;intracellular part		Glycos_transf_1	CHIANG_LIVER_CANCER_SUBCLASS_CTNNB1_DN;chr12q24;DURAND_STROMA_MAX_UP;GSE11057_CD4_EFF_MEM_VS_PBMC_DN;GSE11864_CSF1_IFNG_VS_CSF1_PAM3CYS_IN_MAC_UP;GSE11864_CSF1_VS_CSF1_IFNG_IN_MAC_DN;GSE13485_PRE_VS_POST_YF17D_VACCINATION_PBMC_UP;MEISSNER_NPC_HCP_WITH_H3K4ME2		0.000146177	0.000169492	3	19.4382	NaN	NaN	19.6932	19.528	19.3477	19.4206	19.0941	4	4	4	4	1.19397	0.056061	0.256504
A4Q9F0	Ttll7	TTLL7_MOUSE	Tubulin polyglutamylase TTLL7	18.8878	18.9618	18.4978	18.7275	18.552	18.6367	18.9706	18.3938	18.9626	18.6229	18.6682	18.5669	18.7683	18.6208	17.8726	18.6592						anatomical structure development;cell differentiation;cellular developmental process;cellular macromolecule metabolic process;cellular metabolic process;cellular process;cellular protein metabolic process;developmental process;macromolecule metabolic process;macromolecule modification;metabolic process;nervous system development;peptidyl-amino acid modification;peptidyl-glutamic acid modification…	catalytic activity;ligase activity	cell part;cell projection;cilium;cytoplasm;cytoskeleton;dendrite;intracellular non-membrane-bounded organelle;intracellular organelle;intracellular part;neuron projection;non-membrane-bounded organelle;organelle;perikaryon		TTL	BENPORATH_ES_WITH_H3K27ME3;BRCA1_DN.V1_UP;CAGCTG_V$AP4_Q5;CHEBOTAEV_GR_TARGETS_UP;chr1p31;CREIGHTON_ENDOCRINE_THERAPY_RESISTANCE_3;CUI_TCF21_TARGETS_2_DN;GAUSSMANN_MLL_AF4_FUSION_TARGETS_F_UP;GSE10239_MEMORY_VS_DAY4.5_EFF_CD8_TCELL_UP;GSE10239_MEMORY_VS_KLRG1HIGH_EFF_CD8_TCELL_UP;GSE10239_NAIVE_VS_MEMORY_CD8_TCELL_DN;GSE13306_RA_VS_UNTREATED_TCONV_DN;GSE13411_IGM_VS_SWITCHED_MEMORY_BCELL_UP;GSE13…		0.000146177	0.000169492	3	18.8217	NaN	NaN	NaN	18.7687	18.6383	18.7051	18.4802	4	4	4	4	0.293533	0.403723	0.18354
A6H5Y3	Mtr	METH_MOUSE	Methionine synthase	18.3916	18.4438	18.498	18.6334	18.5576	18.736	18.7302	18.6642	18.3877	18.4722	18.4033	18.1557	18.5648	18.4928	18.4513	18.8119						amine biosynthetic process;amine metabolic process;aspartate family amino acid biosynthetic process;aspartate family amino acid metabolic process;biosynthetic process;carboxylic acid biosynthetic process;carboxylic acid metabolic process;cellular amine metabolic process;cellular amino acid biosynthetic process;cellular amino acid metabolic process;cellular aromatic compound metabolic process;cell…	5-methyltetrahydrofolate-dependent methyltransferase activity;binding;catalytic activity;cation binding;cobalamin binding;homocysteine S-methyltransferase activity;ion binding;metal ion binding;methionine synthase activity;methyltransferase activity;S-adenosylmethionine-dependent methyltransferase activity;S-methyltransferase activity;tetrapyrrole binding;transferase activity;transferase activity…	cell part;cytoplasm;cytoplasmic part;cytosol;intracellular part	Cysteine and methionine metabolism;One carbon pool by folate;Selenocompound metabolism	B12-binding;B12-binding_2;Met_synt_B12;Pterin_bind;S-methyl_trans	ACTAYRNNNCCCR_UNKNOWN;BROWNE_HCMV_INFECTION_48HR_DN;CAIRO_HEPATOBLASTOMA_UP;CHICAS_RB1_TARGETS_SENESCENT;chr1q43;DACOSTA_UV_RESPONSE_VIA_ERCC3_DN;DIAZ_CHRONIC_MEYLOGENOUS_LEUKEMIA_UP;DODD_NASOPHARYNGEAL_CARCINOMA_DN;GATTGGY_V$NFY_Q6_01;GGAMTNNNNNTCCY_UNKNOWN;GGGCGGR_V$SP1_Q6;GSE13411_SWITCHED_MEMORY_BCELL_VS_PLASMA_CELL_UP;GSE13484_12H_VS_3H_YF17D_VACCINE_STIM_PBMC_DN;GSE14769_UNSTIM_VS_360MIN_LP…	REACT_277860;REACT_283123;REACT_294704	0.000146177	0.000169492	4	18.4842	NaN	20.1208	19.0266	18.4917	18.672	18.3547	18.5802	4	4	4	4	1.65506	0.0607469	0.786969
A6H5Z3	Exoc6b	EXC6B_MOUSE	Exocyst complex component 6B	20.0789	20.3041	20.2029	20.4419	20.2953	20.1055	20.1194	19.9467	20.2433	20.1135	20.2188	20.0987	19.9278	20.1384	19.7916	20.2417						cellular process;membrane docking;vesicle docking;vesicle docking involved in exocytosis		cell cortex part;cell part;cytoplasmic part;exocyst;intracellular part;macromolecular complex;protein complex		Sec15	BEIER_GLIOMA_STEM_CELL_DN;BRCA1_DN.V1_DN;BROWNE_HCMV_INFECTION_12HR_DN;BRUINS_UVC_RESPONSE_VIA_TP53_GROUP_D;chr2p13;CORRE_MULTIPLE_MYELOMA_UP;DUTERTRE_ESTRADIOL_RESPONSE_24HR_DN;GSE11864_CSF1_VS_CSF1_IFNG_PAM3CYS_IN_MAC_UP;GSE13229_MATURE_VS_INTMATURE_NKCELL_DN;GSE14769_40MIN_VS_360MIN_LPS_BMDM_DN;GSE16522_MEMORY_VS_NAIVE_CD8_TCELL_UP;GSE24634_IL4_VS_CTRL_TREATED_NAIVE_CD4_TCELL_DAY7_DN;GSE31082_…		0.000146177	0.000169492	13	20.2898	20.0918	21.9914	19.5732	20.2569	20.1167	20.1686	20.0249	4	4	4	4	0.643947	0.301476	0.469179
Q922V4	Plrg1	PLRG1_MOUSE	Pleiotropic regulator 1	21.2048	21.2205	21.5212	21.5731	21.6543	21.7019	21.662	21.5905	22.1398	21.9433	21.8316	21.6968	21.7544	21.6376	21.311	21.005	+	+				cellular localization;cellular macromolecule localization;cellular macromolecule metabolic process;cellular metabolic process;cellular nitrogen compound metabolic process;cellular process;cellular protein localization;localization;macromolecule localization;macromolecule metabolic process;metabolic process;mRNA metabolic process;mRNA processing;nitrogen compound metabolic process;nucleic acid met…		catalytic step 2 spliceosome;cell part;chromosomal part;DNA replication factor A complex;intracellular organelle part;intracellular part;macromolecular complex;nuclear body;nuclear chromosome part;nuclear part;nuclear speck;nucleoplasm;nucleoplasm part;organelle part;protein complex;ribonucleoprotein complex;spliceosomal complex	Spliceosome	WD40	BOCHKIS_FOXA2_TARGETS;BYSTRYKH_HEMATOPOIESIS_STEM_CELL_QTL_TRANS;chr4q31;GSE11864_UNTREATED_VS_CSF1_IFNG_IN_MAC_DN;GSE11924_TH2_VS_TH17_CD4_TCELL_UP;GSE14308_NAIVE_CD4_TCELL_VS_NATURAL_TREG_DN;GSE15930_NAIVE_VS_48H_IN_VITRO_STIM_CD8_TCELL_DN;GSE15930_NAIVE_VS_48H_IN_VITRO_STIM_IFNAB_CD8_TCELL_DN;GSE15930_NAIVE_VS_48H_IN_VITRO_STIM_IL12_CD8_TCELL_DN;GSE17721_0.5H_VS_24H_PAM3CSK4_BMDM_DN;GSE17721_A…	REACT_307866	0.000146177	0.000169492	11	21.7201	21.6381	NaN	21.5758	21.3799	21.6522	21.9029	21.427	4	4	4	4	1.71086	0.0193495	2.08479
A6H611	Mipep	MIPEP_MOUSE	Mitochondrial intermediate peptidase	19.5675	20.1861	19.4019	19.9396	19.851	19.4722	19.5846	19.9154	19.8247	19.8958	20.1471	19.8521	19.507	19.9774	19.4887	19.9558							binding;catalytic activity;cation binding;endopeptidase activity;hydrolase activity;ion binding;metal ion binding;metalloendopeptidase activity;metallopeptidase activity;peptidase activity;peptidase activity, acting on L-amino acid peptides	cell part;cytoplasmic part;intracellular membrane-bounded organelle;intracellular organelle;intracellular organelle lumen;intracellular organelle part;intracellular part;membrane-bounded organelle;membrane-enclosed lumen;mitochondrial matrix;mitochondrial part;mitochondrion;organelle;organelle lumen;organelle part		Peptidase_M3	BIOPOLYMER_METABOLIC_PROCESS;BIOPOLYMER_MODIFICATION;BLUM_RESPONSE_TO_SALIRASIB_DN;BROWNE_HCMV_INFECTION_14HR_DN;BRUINS_UVC_RESPONSE_LATE;BRUINS_UVC_RESPONSE_VIA_TP53_GROUP_B;CAGGTG_V$E12_Q6;CELLULAR_LOCALIZATION;CELLULAR_MACROMOLECULE_METABOLIC_PROCESS;CELLULAR_PROTEIN_METABOLIC_PROCESS;chr13q12;CREIGHTON_ENDOCRINE_THERAPY_RESISTANCE_5;CYTOPLASM;CYTOPLASMIC_PART;DIAZ_CHRONIC_MEYLOGENOUS_LEUKEMIA…		0.000146177	0.000169492	6	NaN	19.8349	21.8552	NaN	19.7738	19.7058	19.9299	19.7322	4	4	4	4	0.204709	0.531503	0.348914
A6H630	Armt1	ARMT1_MOUSE	Damage-control phosphatase ARMT1	20.8092	20.9515	21.1021	20.9749	20.6415	20.5765	20.6658	20.8479	19.9682	20.3894	20.4067	20.4603	20.5776	20.9003	20.6887	20.1089	+	+				biological regulation;cellular macromolecule metabolic process;cellular metabolic process;cellular process;cellular protein metabolic process;cellular response to stimulus;cellular response to stress;macromolecule metabolic process;macromolecule methylation;macromolecule modification;metabolic process;methylation;one-carbon metabolic process;primary metabolic process;protein alkylation;protein me…	carboxyl-O-methyltransferase activity;catalytic activity;methyltransferase activity;O-methyltransferase activity;protein carboxyl O-methyltransferase activity;protein methyltransferase activity;S-adenosylmethionine-dependent methyltransferase activity;transferase activity;transferase activity, transferring one-carbon groups			DUF89			0.000146177	0.000169492	10	20.8542	20.5948	21.8792	20.277	20.9594	20.6829	20.3061	20.5689	4	4	4	4	2.04236	0.0112288	2.64618
A6H6A9	Rabgap1l	RBG1L_MOUSE	Rab GTPase-activating protein 1-like	19.1315	19.4673	19.4748	16.907	19.3035	19.5767	19.4684	19.5418	19.3124	16.8503	19.2468	19.6101	16.8004	19.5429	19.4376	19.5718						anatomical structure development;biological regulation;cell development;cellular developmental process;cellular process;developmental process;megakaryocyte development;positive regulation of catalytic activity;positive regulation of GTPase activity;positive regulation of hydrolase activity;positive regulation of molecular function;regulation of biological process;regulation of catabolic process;r…	binding;enzyme activator activity;enzyme binding;enzyme regulator activity;GTPase activator activity;GTPase binding;GTPase regulator activity;nucleoside-triphosphatase regulator activity;protein binding;Rab GTPase binding;Ras GTPase binding;small GTPase binding	cell part;cytoplasmic part;early endosome;endosome;Golgi apparatus;intracellular membrane-bounded organelle;intracellular organelle;intracellular part;membrane-bounded organelle;nucleus;organelle		DUF3694;PID;RabGAP-TBC	BACOLOD_RESISTANCE_TO_ALKYLATING_AGENTS_UP;BAELDE_DIABETIC_NEPHROPATHY_DN;BENPORATH_ES_1;BIDUS_METASTASIS_UP;BOQUEST_STEM_CELL_CULTURED_VS_FRESH_UP;BROWNE_HCMV_INFECTION_12HR_DN;BROWNE_HCMV_INFECTION_20HR_DN;BROWNE_HCMV_INFECTION_20HR_UP;BROWNE_HCMV_INFECTION_30MIN_DN;BROWNE_HCMV_INFECTION_4HR_DN;BROWNE_INTERFERON_RESPONSIVE_GENES;BRUINS_UVC_RESPONSE_VIA_TP53_GROUP_C;CHEN_LIVER_METABOLISM_QTL_CIS…		0.000146177	0.000169492	5	NaN	NaN	NaN	NaN	19.3578	19.4726	19.3898	19.5174	3	4	3	3	0.11699	0.494485	0.0036678
A6X8Z5	Arhgap31	RHG31_MOUSE	Rho GTPase-activating protein 31	19.5795	19.2587	19.6456	19.5225	18.7858	19.1456	18.9766	19.1827	19.7042	19.6703	19.4468	19.316	19.1878	19.275	18.3808	16.1942	+					biological regulation;cellular process;cellular response to stimulus;intracellular signal transduction;positive regulation of catalytic activity;positive regulation of GTPase activity;positive regulation of hydrolase activity;positive regulation of molecular function;regulation of biological process;regulation of catabolic process;regulation of catalytic activity;regulation of cellular catabolic …	binding;enzyme activator activity;enzyme regulator activity;GTPase activator activity;GTPase regulator activity;nucleoside-triphosphatase regulator activity;protein binding;protein domain specific binding;SH3 domain binding	adherens junction;anchoring junction;cell junction;cell part;cell projection;cell-substrate adherens junction;cell-substrate junction;focal adhesion;intracellular;lamellipodium		RhoGAP	CCTGCTG,MIR-214;chr3q13;CUI_TCF21_TARGETS_2_DN;GRAESSMANN_APOPTOSIS_BY_DOXORUBICIN_DN;GSE13229_MATURE_VS_INTMATURE_NKCELL_DN;GSE13485_CTRL_VS_DAY3_YF17D_VACCINE_PBMC_DN;GSE13485_DAY3_VS_DAY21_YF17D_VACCINE_PBMC_UP;GSE13485_DAY7_VS_DAY21_YF17D_VACCINE_PBMC_UP;GSE14769_UNSTIM_VS_240MIN_LPS_BMDM_DN;GSE15750_DAY6_VS_DAY10_EFF_CD8_TCELL_DN;GSE17721_0.5H_VS_8H_PAM3CSK4_BMDM_UP;GSE17721_LPS_VS_GARDIQUIM…	REACT_297947	0.000146177	0.000169492	4	19.6606	19.144	NaN	18.3474	19.5016	19.0227	19.5343	18.9479	4	4	4	3	1.00756	0.0218487	0.0953179
A6X919	Dpy19l1	D19L1_MOUSE	Probable C-mannosyltransferase DPY19L1	19.7925	20.3349	20.2224	19.9987	20.9617	20.6611	20.704	17.0574	21.1673	20.7102	20.587	20.6859	20.9346	20.9984	21.0515	21.0045		+				carbohydrate metabolic process;cellular carbohydrate metabolic process;cellular macromolecule metabolic process;cellular metabolic process;cellular process;cellular protein metabolic process;glycosylation;macromolecule glycosylation;macromolecule metabolic process;macromolecule modification;metabolic process;peptidyl-amino acid modification;peptidyl-tryptophan modification;primary metabolic proce…	catalytic activity;mannosyltransferase activity;transferase activity;transferase activity, transferring glycosyl groups;transferase activity, transferring hexosyl groups	cell part;integral to membrane;intracellular organelle part;intracellular part;intrinsic to membrane;membrane;membrane part;nuclear inner membrane;nuclear membrane;nuclear part;organelle inner membrane;organelle membrane;organelle part		Dpy19	BILD_E2F3_ONCOGENIC_SIGNATURE;BUYTAERT_PHOTODYNAMIC_THERAPY_STRESS_DN;CHARAFE_BREAST_CANCER_BASAL_VS_MESENCHYMAL_DN;CHARAFE_BREAST_CANCER_LUMINAL_VS_MESENCHYMAL_DN;CHEBOTAEV_GR_TARGETS_DN;chr7p14;CONCANNON_APOPTOSIS_BY_EPOXOMICIN_DN;CREIGHTON_ENDOCRINE_THERAPY_RESISTANCE_2;DAVICIONI_TARGETS_OF_PAX_FOXO1_FUSIONS_UP;DODD_NASOPHARYNGEAL_CARCINOMA_DN;FORTSCHEGGER_PHF8_TARGETS_DN;GAZDA_DIAMOND_BLACKFA…		0.000146177	0.000169492	7	NaN	19.7377	20.4351	NaN	20.0871	20.7756	20.7876	20.9973	4	3	4	4	0.514116	0.0864828	2.12885
Q9QZ05	Eif2ak4	E2AK4_MOUSE	eIF-2-alpha kinase GCN2	19.5824	19.5163	19.933	19.9934	19.5162	20.0312	19.8167	19.6871	19.8992	20.0417	19.8037	19.4107	19.25	19.3106	18.369	19.4575	+					biological regulation;cell communication;cellular macromolecule metabolic process;cellular metabolic process;cellular process;cellular protein metabolic process;cellular response to amino acid starvation;cellular response to chemical stimulus;cellular response to external stimulus;cellular response to extracellular stimulus;cellular response to nutrient levels;cellular response to organic substan…	adenyl nucleotide binding;adenyl ribonucleotide binding;ATP binding;binding;catalytic activity;eukaryotic initiation factor eIF2 binding;eukaryotic translation initiation factor 2alpha kinase activity;kinase activity;nucleotide binding;phosphotransferase activity, alcohol group as acceptor;protein binding;protein kinase activity;protein serine/threonine kinase activity;purine nucleotide binding;p…	cell part;cytoplasmic part;cytosolic part;cytosolic ribosome;intracellular non-membrane-bounded organelle;intracellular organelle;intracellular part;macromolecular complex;non-membrane-bounded organelle;organelle;ribonucleoprotein complex;ribosome	Hepatitis C;Measles;Protein processing in endoplasmic reticulum	HGTP_anticodon2;Pkinase;RWD	ACEVEDO_NORMAL_TISSUE_ADJACENT_TO_LIVER_TUMOR_UP;BIOCARTA_EIF2_PATHWAY;BIOPOLYMER_METABOLIC_PROCESS;BIOPOLYMER_MODIFICATION;BIOSYNTHETIC_PROCESS;CELLULAR_BIOSYNTHETIC_PROCESS;CELLULAR_COMPONENT_ASSEMBLY;CELLULAR_MACROMOLECULE_METABOLIC_PROCESS;CELLULAR_PROTEIN_METABOLIC_PROCESS;CHIARADONNA_NEOPLASTIC_TRANSFORMATION_CDC25_UP;CHIARADONNA_NEOPLASTIC_TRANSFORMATION_KRAS_CDC25_DN;chr15q13;DODD_NASOPHA…		0.000146177	0.000169492	6	19.7776	19.9805	21.3389	19.3052	19.7563	19.7628	19.7888	19.0968	4	4	4	4	1.55046	0.0148027	0.0637791
A8Y5H7	Sec14l1	S14L1_MOUSE	SEC14-like protein 1	18.7943	18.1885	16.8675	18.6648	16.7711	19.0601	19.0554	17.0574	18.8105	18.4344	18.4327	18.453	18.4264	18.7127	19.1451	16.1942						establishment of localization;transport		cell part;integral to membrane;intrinsic to membrane;membrane part		CRAL_TRIO;CRAL_TRIO_N;PRELI	AAGCACA,MIR-218;AATGTGA,MIR-23A,MIR-23B;ACEVEDO_LIVER_TUMOR_VS_NORMAL_ADJACENT_TISSUE_DN;ACOSTA_PROLIFERATION_INDEPENDENT_MYC_TARGETS_DN;BOQUEST_STEM_CELL_DN;CHIARADONNA_NEOPLASTIC_TRANSFORMATION_CDC25_DN;CHIARADONNA_NEOPLASTIC_TRANSFORMATION_KRAS_DN;chr17q25;CYTAGCAAY_UNKNOWN;CYTOPLASM;CYTOPLASMIC_PART;DACOSTA_UV_RESPONSE_VIA_ERCC3_COMMON_DN;DACOSTA_UV_RESPONSE_VIA_ERCC3_DN;DEBIASI_APOPTOSIS_BY_…		0.000146177	0.000169492	7	18.5948	17.875	NaN	18.8932	18.5492	19.0577	18.5327	18.7614	3	2	4	3	0.0547767	0.697831	0.393832
B0V2N1	Ptprs	PTPRS_MOUSE	Receptor-type tyrosine-protein phosphatase S	21.3021	21.1208	20.9373	21.5036	21.7267	21.6109	21.3732	21.4216	21.6835	21.67	21.6282	21.4183	21.5796	21.4464	21.342	22.3424						anatomical structure development;biological adhesion;cell adhesion;cellular macromolecule metabolic process;cellular metabolic process;cellular process;cellular protein metabolic process;cerebellum development;cerebral cortex development;corpus callosum development;dephosphorylation;developmental process;hippocampus development;macromolecule metabolic process;macromolecule modification;metabolic …	catalytic activity;hydrolase activity;hydrolase activity, acting on ester bonds;phosphatase activity;phosphoprotein phosphatase activity;phosphoric ester hydrolase activity;protein tyrosine phosphatase activity	cell part;extracellular membrane-bounded organelle;extracellular organelle;extracellular region part;extracellular vesicular exosome;integral to membrane;intrinsic to membrane;membrane part;membrane-bounded organelle;membrane-bounded vesicle;organelle;vesicle		fn3;I-set;Y_phosphatase	BONOME_OVARIAN_CANCER_SURVIVAL_SUBOPTIMAL_DEBULKING;BOYLAN_MULTIPLE_MYELOMA_C_D_UP;BRCA1_DN.V1_UP;BRUINS_UVC_RESPONSE_LATE;CAGCTG_V$AP4_Q5;CAIRO_LIVER_DEVELOPMENT_UP;chr19p13;DELACROIX_RARG_BOUND_MEF;FIGUEROA_AML_METHYLATION_CLUSTER_1_DN;FIGUEROA_AML_METHYLATION_CLUSTER_4_DN;GOLDRATH_NAIVE_VS_MEMORY_CD8_TCELL_UP;GRAESSMANN_APOPTOSIS_BY_DOXORUBICIN_DN;GRAESSMANN_RESPONSE_TO_MC_AND_DOXORUBICIN_DN;G…	REACT_354321	0.000146177	0.000169492	20	21.5274	21.286	23.6607	21.6156	21.216	21.5331	21.6	21.6776	4	4	4	4	0.827498	0.0871189	1.51775
B1AVZ0	Uprt	UPP_MOUSE	Uracil phosphoribosyltransferase homolog	19.097	19.4133	19.4432	19.4877	19.3319	19.2689	19.3616	19.4935	18.8064	19.3857	19.3849	19.3952	19.2758	19.4532	19.2866	19.9653						biological regulation;biosynthetic process;body fluid secretion;cellular biosynthetic process;cellular metabolic process;cellular nitrogen compound biosynthetic process;cellular nitrogen compound metabolic process;cellular process;establishment of localization;female pregnancy;heterocycle biosynthetic process;heterocycle metabolic process;lactation;metabolic process;multicellular organismal proce…		cell part;cytoplasm;intracellular membrane-bounded organelle;intracellular organelle;intracellular part;membrane-bounded organelle;nucleus;organelle	Pyrimidine metabolism		CTTTGT_V$LEF1_Q2;DANG_BOUND_BY_MYC;DANG_MYC_TARGETS_UP;GGGCGGR_V$SP1_Q6;GSE14000_TRANSLATED_RNA_VS_MRNA_4H_LPS_DC_UP;GSE15659_TREG_VS_TCONV_UP;GSE17974_IL4_AND_ANTI_IL12_VS_UNTREATED_12H_ACT_CD4_TCELL_UP;GSE17974_IL4_AND_ANTI_IL12_VS_UNTREATED_72H_ACT_CD4_TCELL_UP;KEGG_PYRIMIDINE_METABOLISM;KRIEG_HYPOXIA_NOT_VIA_KDM3A;RNGTGGGC_UNKNOWN;V$CRX_Q4;V$EGR2_01;WTGAAAT_UNKNOWN		0.000146177	0.000169492	4	19.2389	18.5606	NaN	19.7815	19.3603	19.364	19.243	19.4952	4	4	4	4	0.260061	0.474095	0.28592
B1AWN6	Scn2a	SCN2A_MOUSE	Sodium channel protein type 2 subunit alpha	21.7961	21.964	22.4932	22.0963	22.0739	21.8415	22.1342	21.9469	21.6437	21.797	21.6749	21.9757	21.6899	22.0947	21.6548	21.2444						anatomical structure development;apoptosis;biological regulation;cation transport;cell death;cellular chemical homeostasis;cellular homeostasis;cellular ion homeostasis;cellular process;chemical homeostasis;death;developmental process;establishment of localization;homeostatic process;induction of apoptosis;induction of apoptosis by intracellular signals;induction of apoptosis by ionic changes;ind…	cation channel activity;cation transmembrane transporter activity;channel activity;gated channel activity;ion channel activity;ion transmembrane transporter activity;passive transmembrane transporter activity;sodium channel activity;substrate-specific channel activity;substrate-specific transmembrane transporter activity;substrate-specific transporter activity;transmembrane transporter activity;t…	axon;axon part;cation channel complex;cell junction;cell part;cell projection;cell projection part;cell-cell contact zone;cell-cell junction;intercalated disc;ion channel complex;macromolecular complex;membrane;membrane part;neuron projection;paranode region of axon;plasma membrane part;protein complex;sodium channel complex;T-tubule;voltage-gated sodium channel complex		DUF3451;Ion_trans;Na_trans_assoc			0.000146177	0.000169492	15	21.592	21.2087	23.196	NaN	22.0874	21.9991	21.7728	21.671	4	4	4	4	0.928587	0.0778103	0.96727
B1AX39	Zcchc7	ZCHC7_MOUSE	Zinc finger CCHC domain-containing protein 7	16.457	15.8921	16.2051	16.4871	15.9974	16.4018	16.4656	17.0574	16.2402	15.3939	16.6039	16.0881	15.5097	16.1006	16.367	14.6204							binding;cation binding;ion binding;metal ion binding;transition metal ion binding;zinc ion binding	cell part;cytoplasm;intracellular membrane-bounded organelle;intracellular non-membrane-bounded organelle;intracellular organelle;intracellular organelle part;intracellular part;membrane-bounded organelle;non-membrane-bounded organelle;nuclear part;nucleolus;nucleus;organelle;organelle part	RNA degradation	zf-CCHC	ACTAYRNNNCCCR_UNKNOWN;CACGTG_V$MYC_Q2;chr9p13;E2F3_UP.V1_DN;GGGAGGRR_V$MAZ_Q6;GGGCGGR_V$SP1_Q6;GSE34205_HEALTHY_VS_FLU_INF_INFANT_PBMC_UP;JOHNSTONE_PARVB_TARGETS_3_DN;KEGG_RNA_DEGRADATION;LIAO_METASTASIS;RCGCANGCGY_V$NRF1_Q6;RODRIGUES_THYROID_CARCINOMA_ANAPLASTIC_DN;RODRIGUES_THYROID_CARCINOMA_ANAPLASTIC_UP;RODRIGUES_THYROID_CARCINOMA_POORLY_DIFFERENTIATED_DN;RODWELL_AGING_KIDNEY_UP;RYTTCCTG_V$ET…		0.000146177	0.000169492	4	16.9085	NaN	NaN	NaN	16.2603	16.2883	16.0815	15.4102	4	3	4	3	0.685308	0.0683776	0.253135
A2AF47	Dock11	DOC11_MOUSE	Dedicator of cytokinesis protein 11	18.646	18.6404	19.2419	19.238	18.4706	18.8015	18.4452	18.4503	19.2264	19.1629	19.2156	18.902	19.0242	18.7487	18.6594	18.1722	+					biological regulation;cellular process;cellular response to stimulus;intracellular signal transduction;positive regulation of catalytic activity;positive regulation of GTPase activity;positive regulation of hydrolase activity;positive regulation of molecular function;regulation of biological process;regulation of catabolic process;regulation of catalytic activity;regulation of cellular catabolic …	binding;enzyme binding;enzyme regulator activity;GTPase binding;GTPase regulator activity;guanyl-nucleotide exchange factor activity;nucleoside-triphosphatase regulator activity;protein binding;Ras GTPase binding;Ras guanyl-nucleotide exchange factor activity;Rho GTPase binding;Rho guanyl-nucleotide exchange factor activity;small GTPase binding;small GTPase regulator activity			Ded_cyto;DOCK-C2;DUF3398;PH	AACTTT_UNKNOWN;ACAGGGT,MIR-10A,MIR-10B;ACAWYAAAG_UNKNOWN;BENPORATH_EED_TARGETS;CHEN_METABOLIC_SYNDROM_NETWORK;chrxq24;CREIGHTON_ENDOCRINE_THERAPY_RESISTANCE_3;CREIGHTON_ENDOCRINE_THERAPY_RESISTANCE_5;CTTTAAR_UNKNOWN;CTTTGA_V$LEF1_Q2;DUTERTRE_ESTRADIOL_RESPONSE_24HR_DN;FULCHER_INFLAMMATORY_RESPONSE_LECTIN_VS_LPS_DN;GAGACTG,MIR-452;GGGTGGRR_V$PAX4_03;GSE10094_LCMV_VS_LISTERIA_IND_EFF_CD4_TCELL_UP;G…	REACT_280010	0.000146177	0.000169492	12	18.7664	19.4213	19.9465	18.2322	18.9416	18.5419	19.1267	18.6511	4	4	4	4	1.41201	0.0235845	0.439377
B1AXP6	Tomm5	TOM5_MOUSE	Mitochondrial import receptor subunit TOM5 homolog	16.7211	20.355	19.9587	19.9279	20.1998	20.1654	20.0153	19.8931	16.6434	20.6303	20.2086	20.6356	20.7913	20.4319	19.7267	19.8874						establishment of localization;establishment of localization in cell;establishment of protein localization;establishment of protein localization in mitochondrion;establishment of protein localization to organelle;intracellular protein transport;intracellular transport;mitochondrial transport;protein import;protein targeting;protein targeting to mitochondrion;protein transport;transport		cell part;cytoplasmic part;integral to membrane;intracellular membrane-bounded organelle;intracellular organelle;intracellular organelle part;intracellular part;intrinsic to membrane;macromolecular complex;membrane part;membrane-bounded organelle;mitochondrial membrane part;mitochondrial outer membrane translocase complex;mitochondrial part;mitochondrion;organelle;organelle part;protein complex		TOM_sub5	BASAKI_YBX1_TARGETS_UP;BRUINS_UVC_RESPONSE_LATE;BYSTRYKH_HEMATOPOIESIS_STEM_CELL_QTL_TRANS;GRAESSMANN_APOPTOSIS_BY_DOXORUBICIN_DN;GRAESSMANN_RESPONSE_TO_MC_AND_DOXORUBICIN_DN;GSE13485_DAY1_VS_DAY21_YF17D_VACCINE_PBMC_DN;GSE15659_TREG_VS_TCONV_DN;GSE17974_0H_VS_6H_IN_VITRO_ACT_CD4_TCELL_DN;GSE17974_CTRL_VS_ACT_IL4_AND_ANTI_IL12_12H_CD4_TCELL_DN;GSE17974_CTRL_VS_ACT_IL4_AND_ANTI_IL12_24H_CD4_TCELL_…	REACT_292308	0.000146177	0.000169492	5	NaN	19.2628	NaN	NaN	20.0805	20.0684	20.4915	20.2093	3	4	3	4	0.154213	0.401939	0.0811323
B1AXV0	Frrs1l	FRS1L_MOUSE	DOMON domain-containing protein FRRS1L	20.6949	21.2872	21.4661	20.9966	21.0916	20.9019	20.7861	21.0308	19.7979	20.5644	20.4182	20.9826	20.8679	21.044	20.9373	19.8202		+						cell junction;cell part;integral to membrane;intrinsic to membrane;membrane;membrane part;plasma membrane;synapse		DOMON			0.000146177	0.000169492	8	20.5384	19.8927	NaN	19.772	21.1112	20.9526	20.4408	20.6673	4	4	4	4	0.789188	0.0618334	1.18376
B1AY10	Nfx1	NFX1_MOUSE	Transcriptional repressor NF-X1	16.8113	16.5313	15.6714	16.9615	16.8402	16.6068	16.5418	16.6893	16.5842	16.7553	16.845	16.867	16.9612	15.9939	16.416	17.1014						biological regulation;negative regulation of biological process;negative regulation of biosynthetic process;negative regulation of cellular biosynthetic process;negative regulation of cellular macromolecule biosynthetic process;negative regulation of cellular metabolic process;negative regulation of cellular process;negative regulation of gene expression;negative regulation of macromolecule biosy…	binding;catalytic activity;cation binding;DNA binding;ion binding;ligase activity;metal ion binding;nucleic acid binding;nucleic acid binding transcription factor activity;regulatory region DNA binding;regulatory region nucleic acid binding;RNA polymerase II core promoter proximal region sequence-specific DNA binding transcription factor activity;RNA polymerase II core promoter proximal region se…	cell part;cytoplasm;intracellular membrane-bounded organelle;intracellular organelle;intracellular organelle part;intracellular part;membrane;membrane-bounded organelle;nuclear part;nucleoplasm;nucleus;organelle;organelle part;plasma membrane		R3H;zf-NF-X1	BIOPOLYMER_METABOLIC_PROCESS;BLALOCK_ALZHEIMERS_DISEASE_UP;CACGTG_V$MYC_Q2;CAMP_UP.V1_UP;chr9p12;DEFENSE_RESPONSE;DEURIG_T_CELL_PROLYMPHOCYTIC_LEUKEMIA_DN;DNA_BINDING;DODD_NASOPHARYNGEAL_CARCINOMA_UP;ENK_UV_RESPONSE_EPIDERMIS_UP;GAUSSMANN_MLL_AF4_FUSION_TARGETS_G_UP;GKCGCNNNNNNNTGAYG_UNKNOWN;GSE10325_BCELL_VS_MYELOID_UP;GSE11864_UNTREATED_VS_CSF1_IFNG_IN_MAC_DN;GSE12366_PLASMA_CELL_VS_MEMORY_BCEL…		0.000146177	0.000169492	6	16.5795	17.3421	NaN	NaN	16.4939	16.6695	16.7629	16.6181	4	4	4	4	0.0916137	0.670424	0.400586
B1AY13	Usp24	UBP24_MOUSE	Ubiquitin carboxyl-terminal hydrolase 24	20.1849	20.2298	20.0686	20.2735	20.2316	20.3097	20.3573	20.1131	20.5664	20.5767	20.6385	20.4689	20.6309	20.4899	20.4317	20.3184	+	+				biological regulation;catabolic process;cellular catabolic process;cellular macromolecule catabolic process;cellular macromolecule metabolic process;cellular metabolic process;cellular process;cellular protein metabolic process;macromolecule catabolic process;macromolecule metabolic process;macromolecule modification;metabolic process;modification-dependent macromolecule catabolic process;modific…	catalytic activity;cysteine-type endopeptidase activity;cysteine-type peptidase activity;endopeptidase activity;hydrolase activity;peptidase activity;peptidase activity, acting on L-amino acid peptides;small conjugating protein-specific protease activity;ubiquitin-specific protease activity			UCH	CAIRO_HEPATOBLASTOMA_CLASSES_UP;chr1p32;DACOSTA_UV_RESPONSE_VIA_ERCC3_COMMON_DN;DACOSTA_UV_RESPONSE_VIA_ERCC3_DN;DAIRKEE_TERT_TARGETS_DN;DAZARD_RESPONSE_TO_UV_NHEK_DN;DAZARD_UV_RESPONSE_CLUSTER_G6;GSE13411_IGM_MEMORY_BCELL_VS_PLASMA_CELL_UP;GSE13411_NAIVE_BCELL_VS_PLASMA_CELL_UP;GSE13485_CTRL_VS_DAY21_YF17D_VACCINE_PBMC_UP;GSE1460_INTRATHYMIC_T_PROGENITOR_VS_THYMIC_STROMAL_CELL_UP;GSE15750_DAY6_V…		0.000146177	0.000169492	30	19.8167	19.8456	22.0599	19.7158	20.1892	20.2529	20.5626	20.4677	4	4	4	4	3.21517	0.0111217	3.24537
Q80YN3	Bcas1	BCAS1_MOUSE	Breast carcinoma-amplified sequence 1 homolog	22.2875	23.5071	23.4001	22.6067	23.5371	23.1063	23.49	23.5811	21.804	23.3307	23.1062	23.9315	23.8826	24.0135	24.3247	24.8821	+		+				binding;identical protein binding;protein binding;protein dimerization activity;protein homodimerization activity	cell part;cytoplasmic part;cytosol;extracellular membrane-bounded organelle;extracellular organelle;extracellular region part;extracellular vesicular exosome;intracellular part;membrane-bounded organelle;membrane-bounded vesicle;organelle;vesicle			BECKER_TAMOXIFEN_RESISTANCE_UP;BROWNE_HCMV_INFECTION_30MIN_DN;CAHOY_OLIGODENDROCUTIC;CHANDRAN_METASTASIS_DN;CHARAFE_BREAST_CANCER_LUMINAL_VS_BASAL_UP;CHARAFE_BREAST_CANCER_LUMINAL_VS_MESENCHYMAL_UP;chr20q13;CREIGHTON_ENDOCRINE_THERAPY_RESISTANCE_3;CREIGHTON_ENDOCRINE_THERAPY_RESISTANCE_5;DODD_NASOPHARYNGEAL_CARCINOMA_UP;DUTERTRE_ESTRADIOL_RESPONSE_24HR_DN;FOSTER_KDM1A_TARGETS_UP;FRASOR_RESPONSE_T…		0.000146177	0.000169492	11	NaN	21.2087	24.5891	22.2391	22.9503	23.4286	23.0431	24.2757	4	4	4	4	1.50763	0.00867597	0.0610315
B1AZP2	Dlgap4	DLGP4_MOUSE	Disks large-associated protein 4	21.3725	20.8106	21.1518	21.0572	20.3283	20.1744	20.1923	19.8686	21.0588	20.6706	20.8995	20.4649	20.6317	20.6522	20.1102	20.1325	+			+		signaling		cell part;membrane;synapse		GKAP	AAANWWTGC_UNKNOWN;AACTTT_UNKNOWN;AMIT_EGF_RESPONSE_240_HELA;AMIT_EGF_RESPONSE_480_HELA;ASTIER_INTEGRIN_SIGNALING;ATATGCA,MIR-448;BROWNE_HCMV_INFECTION_48HR_DN;BUYTAERT_PHOTODYNAMIC_THERAPY_STRESS_UP;CCAGGGG,MIR-331;chr20q11;CTACCTC,LET-7A,LET-7B,LET-7C,LET-7D,LET-7E,LET-7F,MIR-98,LET-7G,LET-7I;CTGAGCC,MIR-24;CTTTGT_V$LEF1_Q2;DOUGLAS_BMI1_TARGETS_UP;GGARNTKYCCA_UNKNOWN;GGGCGGR_V$SP1_Q6;GGTGTGT,MIR…		0.000146177	0.000169492	11	21.5771	20.5045	23.1039	20.2878	21.098	20.1409	20.7735	20.3816	4	4	4	4	3.10765	0.00270968	0.949696
B2B9E1	Triqk	TRIQK_MOUSE	Triple QxxK/R motif-containing protein	16.7211	16.8303	16.8675	16.907	16.7711	17.0522	16.7683	17.0574	16.6434	19.791	19.7798	16.6663	19.5486	20.0608	19.7917	21.6026	+		+					cell part;cytoplasmic part;endoplasmic reticulum membrane;endoplasmic reticulum part;integral to membrane;intracellular organelle part;intracellular part;intrinsic to membrane;membrane;membrane part;organelle membrane;organelle part		TRIQK			0.000249906	0.000313529	2	NaN	NaN	NaN	NaN	NaN	NaN	19.7854	20.2509	0	0	2	4	2.8254	0.00125581	0.755309
B2RPU2	Plekhd1	PLHD1_MOUSE	Pleckstrin homology domain-containing family D member 1	21.4345	21.6241	21.7814	21.4833	20.7241	20.1272	20.366	20.5185	21.4571	21.5637	21.4157	21.5075	21.7535	21.7006	21.4145	19.9046	+			+						PH	chr14q24;GSE13306_TREG_VS_TCONV_SPLEEN_UP;GSE7460_CTRL_VS_TGFB_TREATED_ACT_FOXP3_HET_TCONV_DN;GSE7460_CTRL_VS_TGFB_TREATED_ACT_TCONV_DN;PANGAS_TUMOR_SUPPRESSION_BY_SMAD1_AND_SMAD5_DN;ZWANG_TRANSIENTLY_UP_BY_1ST_EGF_PULSE_ONLY		0.000146177	0.000169492	14	21.53	20.7477	NaN	20.8477	21.5808	20.434	21.486	21.1933	4	4	4	4	1.77105	0.00672978	0.517486
Q8BKZ9	Pdhx	ODPX_MOUSE	Pyruvate dehydrogenase protein X component, mitochondrial	23.7072	24.0948	24.272	23.5143	23.798	23.4231	23.8578	23.897	22.1958	23.2164	22.9493	23.6351	23.6866	23.956	23.6166	23.8095	+	+					catalytic activity;transferase activity;transferase activity, transferring acyl groups	cell part;cytoplasmic part;intracellular membrane-bounded organelle;intracellular organelle;intracellular organelle lumen;intracellular organelle part;intracellular part;membrane-bounded organelle;membrane-enclosed lumen;mitochondrial matrix;mitochondrial part;mitochondrion;organelle;organelle lumen;organelle part	Citrate cycle (TCA cycle);Glycolysis / Gluconeogenesis;Pyruvate metabolism	2-oxoacid_dh;Biotin_lipoyl;E3_binding	ACEVEDO_FGFR1_TARGETS_IN_PROSTATE_CANCER_MODEL_UP;ACTGTGA,MIR-27A,MIR-27B;BLALOCK_ALZHEIMERS_DISEASE_DN;BLALOCK_ALZHEIMERS_DISEASE_INCIPIENT_DN;CACTGTG,MIR-128A,MIR-128B;chr11p13;DIAZ_CHRONIC_MEYLOGENOUS_LEUKEMIA_UP;FIGUEROA_AML_METHYLATION_CLUSTER_1_UP;FIGUEROA_AML_METHYLATION_CLUSTER_3_UP;FLECHNER_BIOPSY_KIDNEY_TRANSPLANT_REJECTED_VS_OK_DN;FORTSCHEGGER_PHF8_TARGETS_UP;GSE12845_NAIVE_VS_DARKZONE…	REACT_278177;REACT_293106;REACT_306383	0.000146177	0.000169492	10	22.7973	22.2466	24.171	22.9477	23.8971	23.744	22.9992	23.7672	4	4	4	4	1.68623	0.00984787	1.3749
B2RR83	Ythdc2	YTDC2_MOUSE	3'-5' RNA helicase YTHDC2	19.5618	19.2447	19.1322	18.9096	18.483	18.5386	18.8113	17.0574	19.2329	18.6143	19.1936	18.6045	18.7716	19.1978	18.9979	18.6981	+					cellular macromolecule metabolic process;cellular metabolic process;cellular nitrogen compound metabolic process;cellular process;macromolecule metabolic process;metabolic process;nitrogen compound metabolic process;nucleic acid metabolic process;nucleobase-containing compound metabolic process;primary metabolic process;response to chemical stimulus;response to cytokine stimulus;response to inter…	adenyl nucleotide binding;adenyl ribonucleotide binding;ATP binding;ATPase activity;ATPase activity, coupled;ATP-dependent helicase activity;ATP-dependent RNA helicase activity;binding;catalytic activity;enzyme binding;helicase activity;hydrolase activity;hydrolase activity, acting on acid anhydrides;hydrolase activity, acting on acid anhydrides, in phosphorus-containing anhydrides;nucleoside-tri…	cell part;cytoplasm;cytoplasmic part;endoplasmic reticulum;intracellular membrane-bounded organelle;intracellular organelle;intracellular part;membrane-bounded organelle;nucleus;organelle		Ank_2;DEAD;HA2;Helicase_C;OB_NTP_bind;R3H;YTH	BILD_SRC_ONCOGENIC_SIGNATURE;BONOME_OVARIAN_CANCER_SURVIVAL_SUBOPTIMAL_DEBULKING;CADWELL_ATG16L1_TARGETS_DN;CHEOK_RESPONSE_TO_MERCAPTOPURINE_AND_HD_MTX_DN;chr5q22;GABRIELY_MIR21_TARGETS;GAUSSMANN_MLL_AF4_FUSION_TARGETS_A_UP;GSE11924_TH1_VS_TH2_CD4_TCELL_UP;GSE13411_SWITCHED_MEMORY_BCELL_VS_PLASMA_CELL_UP;GSE13484_UNSTIM_VS_12H_YF17D_VACCINE_STIM_PBMC_UP;GSE20151_CTRL_VS_FUSOBACT_NUCLEATUM_NEUTROP…		0.000146177	0.000169492	11	19.1486	18.9539	NaN	NaN	19.2121	18.611	18.9113	18.9164	4	3	4	4	1.21699	0.0192282	0.652415
B2RRD7	Brpf1	BRPF1_MOUSE	Peregrin	18.8723	18.5842	18.8972	18.7405	19.0232	19.1771	19.0368	19.0895	19.2587	19.2632	19.1752	19.2085	19.0604	19.1025	18.9223	17.4064		+				biological regulation;cellular component organization;cellular component organization at cellular level;cellular component organization or biogenesis;cellular component organization or biogenesis at cellular level;cellular macromolecule metabolic process;cellular metabolic process;cellular process;cellular protein metabolic process;chromatin modification;chromatin organization;chromosome organiza…	binding;cation binding;ion binding;metal ion binding;transition metal ion binding;zinc ion binding	cell part;H3 histone acetyltransferase complex;histone acetyltransferase complex;intracellular membrane-bounded organelle;intracellular organelle;intracellular organelle part;intracellular part;macromolecular complex;membrane-bounded organelle;MOZ/MORF histone acetyltransferase complex;nuclear part;nucleoplasm part;nucleus;organelle;organelle part;protein complex		Bromodomain;EPL1;PWWP	ACACTCC,MIR-122A;ATACTGT,MIR-144;BLALOCK_ALZHEIMERS_DISEASE_UP;CAGGTA_V$AREB6_01;CATTGTYY_V$SOX9_B1;CCTGCTG,MIR-214;chr3p26;CSR_EARLY_UP.V1_UP;CTCAGGG,MIR-125B,MIR-125A;CTCCAAG,MIR-432;CTGYNNCTYTAA_UNKNOWN;CTTTAAR_UNKNOWN;FRASOR_RESPONSE_TO_SERM_OR_FULVESTRANT_DN;GGCCAGT,MIR-193A,MIR-193B;GGGCGGR_V$SP1_Q6;GSE11924_TFH_VS_TH2_CD4_TCELL_UP;GSE13484_UNSTIM_VS_YF17D_VACCINE_STIM_PBMC_UP;GSE13493_DP_V…	REACT_291621	0.000146177	0.000169492	6	18.5829	NaN	NaN	19.3597	18.7735	19.0816	19.2264	18.6229	4	4	4	4	0.686273	0.0836818	3.03281
B2RRE7	Otud4	OTUD4_MOUSE	OTU domain-containing protein 4	18.1964	18.4913	18.5142	18.3505	17.8591	17.3426	18.2044	18.0663	17.6361	18.2404	18.1723	18.4573	18.1773	18.4382	18.5793	18.2992	+					cellular macromolecule metabolic process;cellular metabolic process;cellular process;cellular protein metabolic process;macromolecule metabolic process;macromolecule modification;metabolic process;primary metabolic process;protein deubiquitination;protein K48-linked deubiquitination;protein metabolic process;protein modification by small protein conjugation or removal;protein modification by smal…	catalytic activity;cysteine-type peptidase activity;hydrolase activity;peptidase activity;peptidase activity, acting on L-amino acid peptides;small conjugating protein-specific protease activity;ubiquitin-specific protease activity			OTU	ACATATC,MIR-190;ACCAAAG,MIR-9;ACEVEDO_METHYLATED_IN_LIVER_CANCER_DN;ACTTTAT,MIR-142-5P;AGCACTT,MIR-93,MIR-302A,MIR-302B,MIR-302C,MIR-302D,MIR-372,MIR-373,MIR-520E,MIR-520A,MIR-526B,MIR-520B,MIR-520C,MIR-520D;AMUNDSON_POOR_SURVIVAL_AFTER_GAMMA_RADIATION_2G;ATGCTGC,MIR-103,MIR-107;ATTCTTT,MIR-186;BAELDE_DIABETIC_NEPHROPATHY_DN;BERENJENO_TRANSFORMED_BY_RHOA_UP;BRUINS_UVC_RESPONSE_MIDDLE;CACTTTG,MIR-…		0.000146177	0.000169492	7	17.7255	NaN	20.8916	18.0982	18.3881	17.8681	18.1265	18.3735	4	4	4	4	1.15316	0.0388067	0.665227
O35226	Psmd4	PSMD4_MOUSE	26S proteasome non-ATPase regulatory subunit 4	22.13	22.2002	22.231	22.1071	22.0481	21.8875	22.1113	21.9726	22.0651	22.4492	22.3102	22.5281	22.6001	22.5067	22.7002	22.9963	+		+			catabolic process;cellular catabolic process;cellular macromolecule catabolic process;cellular macromolecule metabolic process;cellular metabolic process;cellular process;macromolecule catabolic process;macromolecule metabolic process;metabolic process;modification-dependent macromolecule catabolic process;modification-dependent protein catabolic process;primary metabolic process;protein metaboli…	binding;identical protein binding;protein binding	cell part;cytoplasm;intracellular organelle part;intracellular part;macromolecular complex;nuclear part;nucleoplasm;organelle part;proteasome accessory complex;proteasome complex;proteasome regulatory particle, base subcomplex;protein complex	Proteasome	UIM	BROWNE_HCMV_INFECTION_14HR_DN;BRUINS_UVC_RESPONSE_LATE;CAIRO_HEPATOBLASTOMA_UP;chr1q21;GATTGGY_V$NFY_Q6_01;GAVIN_FOXP3_TARGETS_CLUSTER_T4;GNF2_G22P1;GNF2_PPP6C;GRADE_COLON_AND_RECTAL_CANCER_UP;GRADE_COLON_CANCER_UP;GSE12845_NAIVE_VS_DARKZONE_GC_TONSIL_BCELL_DN;GSE13484_12H_VS_3H_YF17D_VACCINE_STIM_PBMC_UP;GSE14308_NAIVE_CD4_TCELL_VS_NATURAL_TREG_UP;GSE14308_TH1_VS_TH17_DN;GSE1460_DP_THYMOCYTE_VS_…	REACT_274287;REACT_275686;REACT_275732;REACT_278878;REACT_289441;REACT_294625;REACT_297888;REACT_299120;REACT_301078;REACT_310780;REACT_315933;REACT_321346;REACT_326233;REACT_329431;REACT_334737;REACT_336463;REACT_336745;REACT_337766;REACT_341044;REACT_341075;REACT_342086;REACT_342636;REACT_343561;REACT_343568;REACT_345193;REACT_347264;REACT_351311;REACT_353777;REACT_359269;REACT_359387;REACT_360…	0.000146177	0.000169492	8	22.038	21.6563	25.1331	22.6463	22.1671	22.0049	22.3381	22.7008	4	4	4	4	3.55096	0.00317197	0.805645
B2RUJ5	Apba1	APBA1_MOUSE	Amyloid-beta A4 precursor protein-binding family A member 1	21.2571	21.0945	21.0551	20.9413	20.9151	20.6956	20.9192	20.9453	21.3317	21.1115	21.2847	21.1419	21.0562	20.8889	21.1871	21.6323						amine transport;amino acid transport;behavior;biological regulation;carboxylic acid transport;cell communication;cell-cell signaling;cellular component assembly;cellular component organization;cellular component organization or biogenesis;cellular process;chordate embryonic development;developmental process;embryo development;embryo development ending in birth or egg hatching;establishment of loc…	beta-amyloid binding;binding;lipid binding;phosphatidylinositol binding;phosphatidylinositol-4,5-bisphosphate binding;phospholipid binding;protein binding	cell part;clathrin-coated vesicle;coated vesicle;cytoplasmic membrane-bounded vesicle;cytoplasmic part;cytoplasmic vesicle;Golgi apparatus;intracellular membrane-bounded organelle;intracellular organelle;intracellular part;macromolecular complex;membrane;membrane-bounded organelle;membrane-bounded vesicle;nucleus;organelle;perinuclear region of cytoplasm;plasma membrane;protein complex;synapse pa…		PDZ;PID	AACTTT_UNKNOWN;AAGWWRNYGGC_UNKNOWN;ANATOMICAL_STRUCTURE_DEVELOPMENT;ATF2_UP.V1_UP;BENPORATH_ES_WITH_H3K27ME3;BERTUCCI_MEDULLARY_VS_DUCTAL_BREAST_CANCER_DN;CAGCTG_V$AP4_Q5;CAGGTG_V$E12_Q6;CCCNNGGGAR_V$OLF1_01;CELL_CELL_SIGNALING;CELLULAR_COMPONENT_ASSEMBLY;CELLULAR_LOCALIZATION;chr9q13;CLATHRIN_COATED_VESICLE;COATED_VESICLE;CTGAGCC,MIR-24;CTIP_DN.V1_DN;CYTOPLASM;CYTOPLASMIC_MEMBRANE_BOUND_VESICLE;…	REACT_324353	0.000146177	0.000169492	11	21.0748	20.8476	23.1767	21.7326	21.087	20.8688	21.2175	21.1911	4	4	4	4	1.06992	0.0842247	0.760329
B2RUR8	Otud7b	OTU7B_MOUSE	OTU domain-containing protein 7B	19.839	19.686	19.7717	20.2477	19.2954	19.6349	19.8683	19.7059	20.1167	19.804	20.0263	19.4544	19.4585	19.6091	19.5499	19.1481						biological regulation;cellular macromolecule metabolic process;cellular metabolic process;cellular process;cellular protein metabolic process;immune response;immune system process;macromolecule metabolic process;macromolecule modification;metabolic process;mucosal immune response;negative regulation of biological process;negative regulation of biosynthetic process;negative regulation of cell comm…	binding;catalytic activity;cation binding;cysteine-type peptidase activity;DNA binding;hydrolase activity;ion binding;K63-linked polyubiquitin binding;metal ion binding;nucleic acid binding;peptidase activity;peptidase activity, acting on L-amino acid peptides;polyubiquitin binding;protein binding;small conjugating protein binding;small conjugating protein-specific protease activity;transition me…	cell part;cytoplasm;intracellular membrane-bounded organelle;intracellular organelle;intracellular part;membrane-bounded organelle;nucleus;organelle		OTU	AACTTT_UNKNOWN;ACCAAAG,MIR-9;ATGGYGGA_UNKNOWN;BENPORATH_NANOG_TARGETS;CAGGTG_V$E12_Q6;CATTGTYY_V$SOX9_B1;chr1q21;CREIGHTON_ENDOCRINE_THERAPY_RESISTANCE_2;CTAWWWATA_V$RSRFC4_Q2;CUI_TCF21_TARGETS_2_DN;CYTOPLASM;DELACROIX_RAR_BOUND_ES;FEVR_CTNNB1_TARGETS_UP;GCGSCMNTTT_UNKNOWN;GGGAGGRR_V$MAZ_Q6;GGGCGGR_V$SP1_Q6;GGGTGGRR_V$PAX4_03;GSE13411_NAIVE_VS_SWITCHED_MEMORY_BCELL_UP;GSE13484_12H_VS_3H_YF17D_VAC…		0.000146177	0.000169492	6	19.8503	NaN	NaN	NaN	19.8861	19.6261	19.8503	19.4414	4	4	4	4	1.0594	0.0570544	0.0659532
B2RVL6	Zcchc24	ZCH24_MOUSE	Zinc finger CCHC domain-containing protein 24	19.0499	17.9409	17.6129	18.9436	16.7711	18.4773	18.6473	18.688	18.5454	18.8391	18.6324	16.6663	18.2591	16.5422	17.9951	18.8354							binding;cation binding;ion binding;metal ion binding;transition metal ion binding;zinc ion binding			zf-3CxxC;zf-CCHC_2	AAAGACA,MIR-511;AAAGGGA,MIR-204,MIR-211;ACTGTGA,MIR-27A,MIR-27B;ATGTTAA,MIR-302C;BAELDE_DIABETIC_NEPHROPATHY_UP;BERTUCCI_MEDULLARY_VS_DUCTAL_BREAST_CANCER_DN;BONOME_OVARIAN_CANCER_SURVIVAL_SUBOPTIMAL_DEBULKING;BOYAULT_LIVER_CANCER_SUBCLASS_G3_DN;BROWNE_HCMV_INFECTION_14HR_DN;CAGCTG_V$AP4_Q5;CAGTATT,MIR-200B,MIR-200C,MIR-429;CAGTGTT,MIR-141,MIR-200A;CAIRO_HEPATOBLASTOMA_CLASSES_DN;CHANG_CORE_SERUM…		0.000146177	0.000169492	4	NaN	NaN	NaN	19.1281	18.3868	18.6042	18.6723	18.3632	4	3	3	3	0.0432143	0.750768	0.131116
Q02053	Uba1	UBA1_MOUSE	Ubiquitin-like modifier-activating enzyme 1	24.5672	24.6653	24.9278	24.6812	24.8214	24.7481	24.8204	24.9212	24.3642	24.6889	24.533	24.6983	24.8021	24.9228	24.737	24.722						catabolic process;cellular catabolic process;cellular macromolecule catabolic process;cellular macromolecule metabolic process;cellular metabolic process;cellular process;cellular response to stimulus;cellular response to stress;macromolecule catabolic process;macromolecule metabolic process;metabolic process;modification-dependent macromolecule catabolic process;modification-dependent protein ca…	acid-amino acid ligase activity;adenyl nucleotide binding;adenyl ribonucleotide binding;ATP binding;binding;catalytic activity;ligase activity;ligase activity, forming carbon-nitrogen bonds;nucleotide binding;purine nucleotide binding;purine ribonucleoside triphosphate binding;purine ribonucleotide binding;ribonucleotide binding;small conjugating protein ligase activity;small protein activating e…	anchoring junction;cell junction;cell part;cell-cell junction;chromatin;chromosomal part;cytoplasm;cytoplasmic part;cytosol;desmosome;endoplasmic reticulum membrane;endoplasmic reticulum part;endosomal part;endosome membrane;extracellular membrane-bounded organelle;extracellular organelle;extracellular region part;extracellular vesicular exosome;heterochromatin;intracellular membrane-bounded orga…	Parkinson's disease;Ubiquitin mediated proteolysis	ThiF;UBA_e1_C;UBA_e1_thiolCys;UBACT	BARIS_THYROID_CANCER_DN;BIOCARTA_PROTEASOME_PATHWAY;BRUINS_UVC_RESPONSE_VIA_TP53_GROUP_C;CACGTG_V$MYC_Q2;CAGGTA_V$AREB6_01;CHAUHAN_RESPONSE_TO_METHOXYESTRADIOL_DN;chrxp11;DACOSTA_UV_RESPONSE_VIA_ERCC3_TTD_UP;DACOSTA_UV_RESPONSE_VIA_ERCC3_UP;DISTECHE_ESCAPED_FROM_X_INACTIVATION;ENK_UV_RESPONSE_KERATINOCYTE_UP;FLECHNER_BIOPSY_KIDNEY_TRANSPLANT_REJECTED_VS_OK_DN;FOURNIER_ACINAR_DEVELOPMENT_LATE_2;GC…	REACT_343568	0.000146177	0.000169492	29	24.6702	24.4706	25.9463	25.0015	24.7104	24.8278	24.5711	24.796	4	4	4	4	1.27533	0.119291	0.598493
B2RXC1	Trappc11	TPC11_MOUSE	Trafficking protein particle complex subunit 11	19.7999	20.224	20.0088	20.0985	20.1756	20.1169	20.1628	20.0068	19.9273	20.1834	20.1944	20.179	20.1528	20.2168	19.8038	20.1693						cellular process;establishment of localization;transport;vesicle-mediated transport		cell part;cytoplasmic part;Golgi apparatus;intracellular membrane-bounded organelle;intracellular organelle;intracellular part;membrane-bounded organelle;organelle		Foie-gras_1;Gryzun-like			0.000146177	0.000169492	19	19.7237	19.8326	22.2339	19.4172	20.0328	20.1156	20.121	20.0857	4	4	4	4	0.079444	0.849474	0.34285
Q8BXR9	Osbpl6	OSBL6_MOUSE	Oxysterol-binding protein-related protein 6	21.2678	21.2252	21.0647	21.4154	20.9717	21.044	21.0743	20.9787	21.6525	21.2853	21.3421	21.0612	21.1786	21.0473	20.6078	20.6639	+					establishment of localization;lipid transport;organic substance transport;transport	binding;lipid binding	cell part;cytoplasmic part;cytosol;endoplasmic reticulum part;intracellular organelle part;intracellular part;membrane;nuclear membrane;nuclear part;organelle membrane;organelle part;perinuclear endoplasmic reticulum;plasma membrane		Oxysterol_BP	AACTTT_UNKNOWN;ACTGAAA,MIR-30A-3P,MIR-30E-3P;ATGTACA,MIR-493;ATGTTTC,MIR-494;BENPORATH_CYCLING_GENES;BRUINS_UVC_RESPONSE_EARLY_LATE;CAGGTA_V$AREB6_01;chr2q32;CREIGHTON_ENDOCRINE_THERAPY_RESISTANCE_1;CTATGCA,MIR-153;CTTTGA_V$LEF1_Q2;CTTTGT_V$LEF1_Q2;DAWSON_METHYLATED_IN_LYMPHOMA_TCL1;DODD_NASOPHARYNGEAL_CARCINOMA_UP;FEVR_CTNNB1_TARGETS_UP;GATTGGY_V$NFY_Q6_01;GEORGES_TARGETS_OF_MIR192_AND_MIR215;GR…		0.000146177	0.000169492	19	21.2694	21.3441	21.9302	20.3249	21.2433	21.0172	21.3353	20.8744	4	4	4	4	1.56829	0.0279164	0.26754
B2RXS4	Plxnb2	PLXB2_MOUSE	Plexin-B2	22.4966	22.31	22.3922	22.4406	22.5637	22.5975	22.5338	22.6307	22.6104	22.6971	22.7006	22.6754	22.7423	22.5945	22.4356	21.7246						anatomical structure development;anatomical structure formation involved in morphogenesis;biological regulation;brain development;cell proliferation;cell surface receptor linked signaling pathway;cellular process;cellular response to stimulus;developmental process;neural precursor cell proliferation;neural tube closure;neuroblast proliferation;organ development;positive regulation of axonogenesis…	molecular transducer activity;receptor activity;semaphorin receptor activity;signal transducer activity;signaling receptor activity;transmembrane signaling receptor activity	cell part;cell surface;extracellular membrane-bounded organelle;extracellular organelle;extracellular region part;extracellular vesicular exosome;integral to membrane;integral to plasma membrane;intracellular;intrinsic to membrane;intrinsic to plasma membrane;membrane part;membrane-bounded organelle;membrane-bounded vesicle;organelle;plasma membrane part;vesicle	Axon guidance	Plexin_cytopl;PSI;Sema;TIG	AMUNDSON_DNA_DAMAGE_RESPONSE_TP53;BAELDE_DIABETIC_NEPHROPATHY_DN;BLALOCK_ALZHEIMERS_DISEASE_INCIPIENT_UP;BLALOCK_ALZHEIMERS_DISEASE_UP;BURTON_ADIPOGENESIS_7;BURTON_ADIPOGENESIS_8;BYSTRYKH_HEMATOPOIESIS_STEM_CELL_QTL_TRANS;CAIRO_HEPATOBLASTOMA_CLASSES_DN;CHEN_METABOLIC_SYNDROM_NETWORK;chr22q13;DEBIASI_APOPTOSIS_BY_REOVIRUS_INFECTION_DN;DELYS_THYROID_CANCER_UP;ESC_J1_UP_LATE.V1_UP;ESC_V6.5_UP_LATE.…		0.000146177	0.000169492	27	22.2365	22.3571	23.2403	22.4883	22.4099	22.5814	22.6709	22.3742	4	4	4	4	0.572551	0.222132	2.95201
B2RY04	Dock5	DOCK5_MOUSE	Dedicator of cytokinesis protein 5	16.7211	18.7942	16.8675	16.907	18.9512	19.0034	18.9258	19.1984	16.6434	16.8503	16.844	16.6663	16.8004	18.8221	18.0757	16.1942	+		+			biological regulation;cellular process;cellular response to stimulus;intracellular signal transduction;positive regulation of catalytic activity;positive regulation of GTPase activity;positive regulation of hydrolase activity;positive regulation of molecular function;regulation of biological process;regulation of catabolic process;regulation of catalytic activity;regulation of cellular catabolic …	enzyme regulator activity;GTPase regulator activity;guanyl-nucleotide exchange factor activity;nucleoside-triphosphatase regulator activity	cell part;cytoplasm;intracellular part		Ded_cyto;DOCK-C2;SH3_1	ATGGYGGA_UNKNOWN;BERENJENO_ROCK_SIGNALING_NOT_VIA_RHOA_DN;BOYLAN_MULTIPLE_MYELOMA_C_DN;BRUINS_UVC_RESPONSE_VIA_TP53_GROUP_A;CAGGTG_V$E12_Q6;CHARAFE_BREAST_CANCER_LUMINAL_VS_BASAL_DN;CHEBOTAEV_GR_TARGETS_UP;CHIANG_LIVER_CANCER_SUBCLASS_UNANNOTATED_UP;chr8p21;CUI_TCF21_TARGETS_2_DN;FEVR_CTNNB1_TARGETS_UP;FULCHER_INFLAMMATORY_RESPONSE_LECTIN_VS_LPS_UP;GOBERT_OLIGODENDROCYTE_DIFFERENTIATION_UP;GOLDRA…		0.000146177	0.000169492	7	NaN	18.8768	NaN	NaN	18.7942	19.0197	NaN	18.4489	1	4	0	2	2.06599	0.00311728	0.533835
B2RY56	Rbm25	RBM25_MOUSE	RNA-binding protein 25	21.6453	21.5565	21.5523	21.5271	21.5927	21.6239	21.6579	21.6532	21.5867	21.7702	21.878	21.9033	21.9311	21.6603	21.9403	20.9046						apoptosis;biological regulation;cell death;cellular macromolecule metabolic process;cellular metabolic process;cellular nitrogen compound metabolic process;cellular process;death;macromolecule metabolic process;metabolic process;mRNA metabolic process;mRNA processing;nitrogen compound metabolic process;nucleic acid metabolic process;nucleobase-containing compound metabolic process;primary metabol…	binding;mRNA binding;nucleic acid binding;nucleotide binding;RNA binding	cell part;cytoplasm;intracellular organelle part;intracellular part;nuclear body;nuclear part;nuclear speck;nucleoplasm part;organelle part	Spliceosome	PWI;RRM_1	AATGTGA,MIR-23A,MIR-23B;ACEVEDO_LIVER_TUMOR_VS_NORMAL_ADJACENT_TISSUE_DN;BILD_CTNNB1_ONCOGENIC_SIGNATURE;BILD_E2F3_ONCOGENIC_SIGNATURE;BRUINS_UVC_RESPONSE_VIA_TP53_GROUP_D;BUYTAERT_PHOTODYNAMIC_THERAPY_STRESS_UP;chr14q24;CTACTGT,MIR-199A;DELASERNA_MYOD_TARGETS_UP;DURCHDEWALD_SKIN_CARCINOGENESIS_DN;FONTAINE_FOLLICULAR_THYROID_ADENOMA_UP;FOURNIER_ACINAR_DEVELOPMENT_LATE_2;GARY_CD5_TARGETS_DN;GAZDA_…		0.000146177	0.000169492	16	21.585	21.3865	23.1948	22.196	21.5703	21.6319	21.7845	21.6091	4	4	4	4	0.17744	0.574562	1.50667
B1AZI6	Thoc2	THOC2_MOUSE	THO complex subunit 2	21.5155	21.2852	21.1096	21.4929	21.43	21.6253	21.7289	21.4422	22.3099	22.0435	22.1813	22.0825	21.9806	21.6202	21.8148	21.0014	+	+				anatomical structure development;anatomical structure morphogenesis;biological regulation;blastocyst development;cell division;cell morphogenesis;cellular component morphogenesis;cellular component organization;cellular component organization or biogenesis;cellular developmental process;cellular macromolecule metabolic process;cellular metabolic process;cellular nitrogen compound metabolic proces…	binding;mRNA binding;nucleic acid binding;RNA binding	cell part;intracellular membrane-bounded organelle;intracellular organelle;intracellular organelle part;intracellular part;macromolecular complex;membrane-bounded organelle;nuclear body;nuclear part;nuclear speck;nucleoplasm;nucleoplasm part;nucleus;organelle;organelle part;protein complex;THO complex;THO complex part of transcription export complex;transcription export complex	RNA transport;Spliceosome	Tho2;Thoc2	ACEVEDO_FGFR1_TARGETS_IN_PROSTATE_CANCER_MODEL_DN;ACEVEDO_LIVER_CANCER_DN;BARRIER_COLON_CANCER_RECURRENCE_UP;BILANGES_SERUM_SENSITIVE_VIA_TSC2;BILD_CTNNB1_ONCOGENIC_SIGNATURE;BLALOCK_ALZHEIMERS_DISEASE_INCIPIENT_UP;BLALOCK_ALZHEIMERS_DISEASE_UP;BROWNE_HCMV_INFECTION_18HR_UP;BROWNE_HCMV_INFECTION_6HR_DN;chrxq25;CREIGHTON_ENDOCRINE_THERAPY_RESISTANCE_5;DACOSTA_UV_RESPONSE_VIA_ERCC3_COMMON_DN;DACOST…		0.000146177	0.000169492	21	21.4712	21.3026	22.826	20.6512	21.3508	21.5566	22.1543	21.6042	4	4	4	4	2.33777	0.00543863	3.41836
B9EHT4	Clip3	CLIP3_MOUSE	CAP-Gly domain-containing linker protein 3	18.3936	18.6583	17.9964	18.6185	18.5795	18.5305	18.9644	18.9246	16.6434	19.1101	18.9368	19.3257	19.3907	19.0861	19.4028	19.095						biological regulation;cell differentiation;cellular component biogenesis;cellular component biogenesis at cellular level;cellular component organization or biogenesis;cellular component organization or biogenesis at cellular level;cellular developmental process;cellular macromolecule metabolic process;cellular metabolic process;cellular process;cellular protein metabolic process;chaperone-mediate…	binding;cytoskeletal protein binding;ganglioside binding;glycolipid binding;glycosphingolipid binding;lipid binding;microtubule binding;protein binding;sphingolipid binding;tubulin binding	cell part;cytoplasmic part;early endosome membrane;endosomal part;endosome membrane;Golgi apparatus part;Golgi membrane;Golgi stack;intracellular organelle part;intracellular part;membrane;membrane part;membrane raft;organelle membrane;organelle part;plasma membrane;recycling endosome membrane;trans-Golgi network;trans-Golgi network membrane		Ank_2;CAP_GLY	BAELDE_DIABETIC_NEPHROPATHY_DN;BLALOCK_ALZHEIMERS_DISEASE_DN;BLALOCK_ALZHEIMERS_DISEASE_INCIPIENT_DN;BMI1_DN.V1_DN;BMI1_DN_MEL18_DN.V1_DN;BROWNE_HCMV_INFECTION_18HR_DN;BRUINS_UVC_RESPONSE_VIA_TP53_GROUP_A;CCTGAGT,MIR-510;CHICAS_RB1_TARGETS_CONFLUENT;chr19q13;CTTGTAT,MIR-381;GCACCTT,MIR-18A,MIR-18B;GCM_CALM1;GCM_MAP4K4;GCM_MAPK10;GGGAGGRR_V$MAZ_Q6;GGGGCCC,MIR-296;GGGTGGRR_V$PAX4_03;GNF2_AF1Q;GNF2_…		0.000146177	0.000169492	7	18.721	19.2859	NaN	NaN	18.4167	18.7498	19.1242	19.2437	4	4	3	4	0.482435	0.118595	0.0474255
B9EJ80	Pdzd8	PDZD8_MOUSE	PDZ domain-containing protein 8	20.4029	20.2233	19.7653	19.763	19.9536	19.9445	19.7991	19.5668	19.7202	19.8157	20.2152	19.7959	19.9822	19.8714	19.7414	20.1451						biological regulation;cellular component organization;cellular component organization at cellular level;cellular component organization or biogenesis;cellular component organization or biogenesis at cellular level;cellular process;cellular response to stimulus;cytoskeleton organization;intracellular signal transduction;organelle organization;regulation of anatomical structure morphogenesis;regula…	binding;cation binding;ion binding;metal ion binding	cell part;membrane		C1_1;PDZ_2	ACEVEDO_METHYLATED_IN_LIVER_CANCER_DN;chr10q26;GAZDA_DIAMOND_BLACKFAN_ANEMIA_PROGENITOR_DN;GRADE_COLON_CANCER_UP;GSE11924_TFH_VS_TH2_CD4_TCELL_DN;GSE13411_NAIVE_BCELL_VS_PLASMA_CELL_UP;GSE13411_SWITCHED_MEMORY_BCELL_VS_PLASMA_CELL_UP;GSE14000_TRANSLATED_RNA_VS_MRNA_4H_LPS_DC_DN;GSE17974_0.5H_VS_72H_IL4_AND_ANTI_IL12_ACT_CD4_TCELL_UP;GSE17974_0.5H_VS_72H_UNTREATED_IN_VITRO_CD4_TCELL_UP;GSE17974_1H…		0.000146177	0.000169492	12	19.2192	19.8226	21.9578	NaN	20.0386	19.816	19.8867	19.935	4	4	4	4	0.220485	0.532802	0.327577
Q5S006	Lrrk2	LRRK2_MOUSE	Leucine-rich repeat serine/threonine-protein kinase 2	17.9699	18.073	17.0519	18.4011	17.5115	17.0522	16.7683	17.0574	18.1861	18.5715	18.6618	18.3187	18.2851	17.7133	16.367	16.1942	+					activation of MAPK activity;activation of MAPKK activity;activation of protein kinase activity;anatomical structure development;anatomical structure morphogenesis;autophagy;behavior;biological regulation;catabolic process;cell death;cell migration;cell motility;cell part morphogenesis;cell projection morphogenesis;cell projection organization;cellular catabolic process;cellular chemical homeostas…	actin binding;adenyl nucleotide binding;adenyl ribonucleotide binding;ATP binding;binding;catalytic activity;clathrin binding;cytoskeletal protein binding;enzyme activator activity;enzyme binding;enzyme regulator activity;glycoprotein binding;GTP binding;GTPase activator activity;GTPase activity;GTPase binding;GTPase regulator activity;GTP-dependent protein kinase activity;guanyl nucleotide bindi…	axon;axon part;cell body;cell junction;cell part;cell projection;cell projection cytoplasm;cell projection part;clathrin coated vesicle membrane;clathrin-coated vesicle;coated vesicle;coated vesicle membrane;cytoplasm;cytoplasmic membrane-bounded vesicle;cytoplasmic part;cytoplasmic vesicle;cytoplasmic vesicle membrane;cytoplasmic vesicle part;cytosol;dendrite;dendrite cytoplasm;endoplasmic retic…	Parkinson's disease	LRR_1;LRR_4;LRR_7;LRR_8;Miro;Pkinase	ACEVEDO_FGFR1_TARGETS_IN_PROSTATE_CANCER_MODEL_UP;ATGAAGG,MIR-205;CHEMNITZ_RESPONSE_TO_PROSTAGLANDIN_E2_DN;chr12q12;CSR_EARLY_UP.V1_DN;GSE10856_CTRL_VS_TNFRSF6B_IN_MACROPHAGE_UP;GSE11057_PBMC_VS_MEM_CD4_TCELL_UP;GSE11924_TH1_VS_TH17_CD4_TCELL_DN;GSE14769_UNSTIM_VS_40MIN_LPS_BMDM_UP;GSE17580_UNINFECTED_VS_S_MANSONI_INF_TEFF_UP;GSE17721_0.5H_VS_24H_CPG_BMDM_DN;GSE17721_0.5H_VS_4H_PAM3CSK4_BMDM_DN;G…		0.000146177	0.000169492	4	17.6008	17.5387	NaN	NaN	17.874	17.5115	18.4345	17.9992	4	1	4	2	1.55535	0.00780757	0.921168
B9EJA2	Cttnbp2	CTTB2_MOUSE	Cortactin-binding protein 2	21.4047	21.0116	21.1913	21.2584	20.2618	20.0833	20.1913	19.9827	21.1177	21.2451	21.3565	21.149	21.1833	21.081	20.9226	20.5691	+		+	+		anatomical structure development;brain development;developmental process;organ development		cell cortex;cell part;cell projection;cell projection part;clathrin-coated vesicle;coated vesicle;cytoplasmic membrane-bounded vesicle;cytoplasmic part;cytoplasmic vesicle;dendritic spine;intracellular membrane-bounded organelle;intracellular organelle;intracellular part;membrane-bounded organelle;membrane-bounded vesicle;neuron projection;neuron spine;organelle;synapse part;synaptic vesicle;vesi…		Ank;Ank_2;CortBP2	AAGCCAT,MIR-135A,MIR-135B;chr7q31;CREIGHTON_ENDOCRINE_THERAPY_RESISTANCE_3;CUI_TCF21_TARGETS_2_DN;GGGACCA,MIR-133A,MIR-133B;GSE13485_DAY3_VS_DAY7_YF17D_VACCINE_PBMC_UP;GSE14000_UNSTIM_VS_16H_LPS_DC_TRANSLATED_RNA_UP;GSE14350_TREG_VS_TEFF_IN_IL2RB_KO_DN;GSE15659_NAIVE_CD4_TCELL_VS_NONSUPPRESSIVE_TCELL_UP;GSE15659_NAIVE_CD4_TCELL_VS_RESTING_TREG_UP;GSE15659_NAIVE_VS_PTPRC_NEG_CD4_TCELL_UP;GSE15750_…		0.000146177	0.000169492	17	21.3563	20.2201	23.4903	21.4365	21.2165	20.1298	21.2171	20.939	4	4	4	4	5.39981	4.12371e-05	0.00193353
B9EKR1	Ptprz1	PTPRZ_MOUSE	Receptor-type tyrosine-protein phosphatase zeta	24.6362	24.8021	24.6739	24.6858	24.7181	24.4536	24.6921	24.6095	24.2741	24.4501	24.4768	24.4856	24.5797	24.505	24.4285	24.9727						anatomical structure morphogenesis;axonogenesis;behavior;biological regulation;cell differentiation;cell part morphogenesis;cell projection morphogenesis;cell projection organization;cellular component morphogenesis;cellular component organization;cellular component organization at cellular level;cellular component organization or biogenesis;cellular component organization or biogenesis at cellul…	catalytic activity;hydrolase activity;hydrolase activity, acting on ester bonds;phosphatase activity;phosphoprotein phosphatase activity;phosphoric ester hydrolase activity;protein tyrosine phosphatase activity	cell part;extracellular matrix;extracellular matrix part;extracellular region part;integral to membrane;intrinsic to membrane;membrane;membrane part;perineuronal net;plasma membrane;proteinaceous extracellular matrix	Epithelial cell signaling in Helicobacter pylori infection	Carb_anhydrase;fn3;Y_phosphatase	ALK_DN.V1_DN;ALONSO_METASTASIS_NEURAL_UP;ALONSO_METASTASIS_UP;ANATOMICAL_STRUCTURE_DEVELOPMENT;BENPORATH_ES_1;BERTUCCI_MEDULLARY_VS_DUCTAL_BREAST_CANCER_DN;BIOPOLYMER_METABOLIC_PROCESS;BIOPOLYMER_MODIFICATION;BRUINS_UVC_RESPONSE_LATE;CAGTATT,MIR-200B,MIR-200C,MIR-429;CELLULAR_MACROMOLECULE_METABOLIC_PROCESS;CELLULAR_PROTEIN_METABOLIC_PROCESS;CENTRAL_NERVOUS_SYSTEM_DEVELOPMENT;chr7q31;CREIGHTON_EN…		0.000146177	0.000169492	25	24.3909	24.2637	26.3588	24.683	24.6995	24.6183	24.4217	24.6215	4	4	4	4	0.98227	0.155399	2.40156
D3YVF0	Akap5	AKAP5_MOUSE	A-kinase anchor protein 5	16.7211	18.6611	18.057	18.3549	18.5373	17.6725	17.5157	17.0574	19.6481	19.7849	19.9805	19.7126	19.7768	19.4295	19.53	20.4704	+	+	+			biological regulation;cellular process;cellular response to stimulus;establishment of localization;establishment of localization in cell;establishment of protein localization;intracellular protein transport;intracellular transport;positive regulation of biological process;positive regulation of biosynthetic process;positive regulation of cAMP biosynthetic process;positive regulation of cAMP metab…	adenylate cyclase binding;binding;enzyme binding;protein binding	cell part;cytoskeleton;intracellular non-membrane-bounded organelle;intracellular organelle;intracellular part;membrane;non-membrane-bounded organelle;organelle;plasma membrane		WSK	ATM_DN.V1_UP;BRUINS_UVC_RESPONSE_VIA_TP53_GROUP_A;CELL_CELL_SIGNALING;CHEMNITZ_RESPONSE_TO_PROSTAGLANDIN_E2_DN;chr14q21;DOANE_RESPONSE_TO_ANDROGEN_UP;ENZYME_BINDING;FERREIRA_EWINGS_SARCOMA_UNSTABLE_VS_STABLE_UP;GGGCGGR_V$SP1_Q6;GOZGIT_ESR1_TARGETS_DN;GSE11924_TFH_VS_TH1_CD4_TCELL_UP;GSE20366_CD103_KLRG1_DP_VS_DN_TREG_UP;GSE20366_CD103_POS_VS_CD103_KLRG1_DP_TREG_UP;GSE7460_CTRL_VS_TGFB_TREATED_ACT…		0.000146177	0.000169492	6	NaN	NaN	24.8468	19.6732	18.3576	17.9085	19.7815	19.8017	3	3	4	4	3.6901	0.00028125	2.25968
D3YXJ0	Dgkh	DGKH_MOUSE	Diacylglycerol kinase eta	19.8892	19.8157	20.0922	19.7293	19.4312	18.9461	18.9116	18.8514	19.553	20.4702	20.3954	20.4137	20.3353	19.6998	19.9707	19.3519	+		+			activation of protein kinase activity;activation of protein kinase C activity by G-protein coupled receptor protein signaling pathway;acylglycerol metabolic process;biological regulation;cell surface receptor linked signaling pathway;cellular component assembly;cellular component organization;cellular component organization or biogenesis;cellular lipid metabolic process;cellular metabolic process…	adenyl nucleotide binding;adenyl ribonucleotide binding;ATP binding;binding;catalytic activity;diacylglycerol kinase activity;identical protein binding;kinase activity;NAD+ kinase activity;nucleotide binding;phosphotransferase activity, alcohol group as acceptor;protein binding;protein dimerization activity;protein homodimerization activity;purine nucleotide binding;purine ribonucleoside triphosp…	cell part;cytoplasm;cytoplasmic part;endosome;intracellular membrane-bounded organelle;intracellular organelle;intracellular organelle part;intracellular part;membrane;membrane-bounded organelle;nuclear membrane;nuclear part;nucleus;organelle;organelle membrane;organelle part	Glycerolipid metabolism;Glycerophospholipid metabolism;Phosphatidylinositol signaling system	C1_1;DAGK_acc;DAGK_cat;PH	AACTTT_UNKNOWN;AAGCCAT,MIR-135A,MIR-135B;ACEVEDO_LIVER_CANCER_WITH_H3K9ME3_DN;ATGCACG,MIR-517B;chr13q13;CTTTGA_V$LEF1_Q2;FIRESTEIN_CTNNB1_PATHWAY;FOSTER_TOLERANT_MACROPHAGE_DN;GSE10463_CD40L_AND_VA347_VS_CD40L_IN_DC_UP;GSE13306_TREG_VS_TCONV_SPLEEN_UP;GSE14308_NAIVE_CD4_TCELL_VS_INDUCED_TREG_DN;GSE14308_TH1_VS_TH17_UP;GSE14308_TH2_VS_NAIVE_CD4_TCELL_DN;GSE14308_TH2_VS_TH1_DN;GSE14350_IL2RB_KO_VS_…	REACT_348749	0.000146177	0.000169492	12	18.7849	NaN	23.5762	20.3762	19.8816	19.0351	20.2081	19.8394	4	4	4	4	2.59999	0.00316667	0.679047
D3YXK2	Safb	SAFB1_MOUSE	Scaffold attachment factor B1	22.5119	22.2622	22.5433	22.5688	22.5751	22.6167	22.6672	22.4038	22.9585	22.7192	23.0117	23.055	22.849	22.7314	22.6944	21.8377		+				biological regulation;biosynthetic process;cellular biosynthetic process;cellular macromolecule biosynthetic process;cellular macromolecule metabolic process;cellular metabolic process;cellular nitrogen compound metabolic process;cellular process;cellular response to stimulus;estrogen receptor signaling pathway;growth;hormone metabolic process;intracellular receptor mediated signaling pathway;mac…	binding;chromatin binding;core promoter binding;DNA binding;nucleic acid binding;nucleotide binding;regulatory region DNA binding;regulatory region nucleic acid binding;transcription regulatory region DNA binding	cell part;intracellular organelle part;intracellular part;nuclear part;nucleoplasm;organelle part		SAP	BLALOCK_ALZHEIMERS_DISEASE_UP;CASORELLI_ACUTE_PROMYELOCYTIC_LEUKEMIA_DN;chr19p13;CHROMOSOME_ORGANIZATION_AND_BIOGENESIS;DNA_BINDING;DOUBLE_STRANDED_DNA_BINDING;ESTABLISHMENT_AND_OR_MAINTENANCE_OF_CHROMATIN_ARCHITECTURE;FAELT_B_CLL_WITH_VH3_21_UP;GCCATNTTG_V$YY1_Q6;GCGSCMNTTT_UNKNOWN;GCM_ING1;GCM_MLL;GCM_NF2;GCM_NUMA1;GGGCGGR_V$SP1_Q6;GSE13485_CTRL_VS_DAY3_YF17D_VACCINE_PBMC_UP;GSE1460_CD4_THYMOCY…		0.000146177	0.000169492	19	23.0292	22.4643	22.9689	23.0191	22.4715	22.5657	22.9361	22.5281	4	4	4	4	1.00332	0.0612701	2.3901
D3YZI9	Pgbd5	PGBD5_MOUSE	PiggyBac transposable element-derived protein 5	20.7625	20.6163	20.0801	20.9524	20.7504	20.9317	20.9637	20.9939	20.9369	21.2277	20.9478	20.9963	21.1549	20.8416	20.7134	20.0326										DDE_Tnp_1_7	AAGCACT,MIR-520F;AGCACTT,MIR-93,MIR-302A,MIR-302B,MIR-302C,MIR-302D,MIR-372,MIR-373,MIR-520E,MIR-520A,MIR-526B,MIR-520B,MIR-520C,MIR-520D;AMIT_SERUM_RESPONSE_240_MCF10A;BHAT_ESR1_TARGETS_NOT_VIA_AKT1_UP;BRUINS_UVC_RESPONSE_VIA_TP53_GROUP_A;chr1q42;DAVICIONI_MOLECULAR_ARMS_VS_ERMS_UP;DOANE_BREAST_CANCER_ESR1_DN;EBAUER_TARGETS_OF_PAX3_FOXO1_FUSION_DN;GAGCCTG,MIR-484;GAUSSMANN_MLL_AF4_FUSION_TARGETS…		0.000146177	0.000169492	11	20.7318	20.2891	22.5597	20.2173	20.6028	20.9099	21.0271	20.6856	4	4	4	4	0.601747	0.145795	1.11173
D3YZP9	Ccdc6	CCDC6_MOUSE	Coiled-coil domain-containing protein 6	20.8172	20.5113	20.3251	20.6898	20.5948	20.5529	20.3687	20.6559	20.8794	20.6451	20.5882	20.7613	20.5824	20.5583	20.5852	21.0817								cell part;cytoplasm;cytoskeleton;intracellular non-membrane-bounded organelle;intracellular organelle;intracellular part;non-membrane-bounded organelle;organelle	Pathways in cancer;Thyroid cancer	DUF2046	AACYNNNNTTCCS_UNKNOWN;AAGCACA,MIR-218;AATGTGA,MIR-23A,MIR-23B;ACACTCC,MIR-122A;ACCAAAG,MIR-9;ACTGAAA,MIR-30A-3P,MIR-30E-3P;AGGTGCA,MIR-500;BAELDE_DIABETIC_NEPHROPATHY_DN;BENPORATH_MYC_MAX_TARGETS;BLALOCK_ALZHEIMERS_DISEASE_DN;BRUINS_UVC_RESPONSE_EARLY_LATE;BYSTRYKH_HEMATOPOIESIS_STEM_CELL_AND_BRAIN_QTL_TRANS;BYSTRYKH_HEMATOPOIESIS_STEM_CELL_QTL_TRANS;CACGTG_V$MYC_Q2;CACTGTG,MIR-128A,MIR-128B;CAGC…		0.000146177	0.000169492	12	20.8991	21.0187	22.881	20.9279	20.5858	20.5431	20.7185	20.7019	4	4	4	4	0.301349	0.491353	0.481616
D3YZU1	Shank1	SHAN1_MOUSE	SH3 and multiple ankyrin repeat domains protein 1	23.692	23.4776	23.7508	23.6065	22.5278	22.4165	22.3611	22.4744	22.8625	23.0612	22.9645	23.0169	23.1414	23.1467	22.4218	21.2074	+	+		+		adult behavior;anatomical structure morphogenesis;associative learning;behavior;behavioral interaction between organisms;biological regulation;cell part morphogenesis;cellular chemical homeostasis;cellular component assembly;cellular component morphogenesis;cellular component organization;cellular component organization at cellular level;cellular component organization or biogenesis;cellular comp…	ankyrin repeat binding;binding;GKAP/Homer scaffold activity;glutamate receptor binding;G-protein-coupled receptor binding;identical protein binding;ionotropic glutamate receptor binding;neuropeptide receptor binding;protein binding;protein complex binding;protein complex scaffold;protein C-terminus binding;protein domain specific binding;receptor binding;receptor signaling complex scaffold activi…	cell junction;cell part;cell projection;cell projection part;cytoplasm;dendrite;dendritic spine;excitatory synapse;intracellular part;ionotropic glutamate receptor complex;macromolecular complex;membrane;membrane part;neuron projection;neuron spine;N-methyl-D-aspartate selective glutamate receptor complex;plasma membrane;plasma membrane part;postsynaptic membrane;protein complex;receptor complex;…		Ank_2;PDZ;SAM_1;SH3_2	BRCA1_DN.V1_UP;CAGGTG_V$E12_Q6;CELL_FRACTION;CHEN_METABOLIC_SYNDROM_NETWORK;chr19q13;DOUGLAS_BMI1_TARGETS_UP;GGGAGGRR_V$MAZ_Q6;GSE12366_GC_BCELL_VS_PLASMA_CELL_DN;GSE1460_CD4_THYMOCYTE_VS_THYMIC_STROMAL_CELL_UP;GSE1460_INTRATHYMIC_T_PROGENITOR_VS_THYMIC_STROMAL_CELL_UP;GTTRYCATRR_UNKNOWN;KRAS.AMP.LUNG_UP.V1_DN;MEMBRANE_FRACTION;MOHANKUMAR_TLX1_TARGETS_DN;PRC1_BMI_UP.V1_UP;RGAANNTTC_V$HSF1_01;RNGT…		0.000146177	0.000169492	36	23.3945	22.4964	24.2766	21.9661	23.6317	22.445	22.9762	22.4793	4	4	4	4	1.9413	0.00449747	3.96782
Q6ZWZ2	Ube2r2	UB2R2_MOUSE	Ubiquitin-conjugating enzyme E2 R2	16.7211	20.0644	20.2038	19.644	19.6311	19.4732	19.856	19.8023	19.4445	19.9268	19.6866	20.1736	20.0981	20.0757	20.576	20.5814			+			catabolic process;cellular catabolic process;cellular macromolecule catabolic process;cellular macromolecule metabolic process;cellular metabolic process;cellular process;cellular protein metabolic process;macromolecule catabolic process;macromolecule metabolic process;macromolecule modification;metabolic process;modification-dependent macromolecule catabolic process;modification-dependent protei…	acid-amino acid ligase activity;adenyl nucleotide binding;adenyl ribonucleotide binding;ATP binding;binding;catalytic activity;enzyme binding;ligase activity;ligase activity, forming carbon-nitrogen bonds;nucleotide binding;protein binding;purine nucleotide binding;purine ribonucleoside triphosphate binding;purine ribonucleotide binding;ribonucleotide binding;small conjugating protein ligase acti…	cell part;cytoplasm;intracellular part	Ubiquitin mediated proteolysis	UQ_con	AAAGGGA,MIR-204,MIR-211;AACTTT_UNKNOWN;ACCAAAG,MIR-9;AGCACTT,MIR-93,MIR-302A,MIR-302B,MIR-302C,MIR-302D,MIR-372,MIR-373,MIR-520E,MIR-520A,MIR-526B,MIR-520B,MIR-520C,MIR-520D;AKT_UP_MTOR_DN.V1_UP;ALCALA_APOPTOSIS;BRUINS_UVC_RESPONSE_LATE;CCTGCTG,MIR-214;chr9p11;CTCAGGG,MIR-125B,MIR-125A;CTTTGT_V$LEF1_Q2;GARY_CD5_TARGETS_UP;GCAAAAA,MIR-129;GGGAGGRR_V$MAZ_Q6;GSE13229_MATURE_VS_INTMATURE_NKCELL_DN;GS…		0.000146177	0.000169492	3	19.5191	19.2258	NaN	19.8197	19.9708	19.6907	19.8079	20.3328	3	4	4	4	0.486634	0.101208	0.331007
D3Z7P3	Gls	GLSK_MOUSE	Glutaminase kidney isoform, mitochondrial	25.129	24.8499	24.6977	24.6811	24.715	24.7606	24.627	24.7644	24.1976	24.1458	24.4183	24.1318	24.2404	24.3201	23.6258	23.5973	+	+	+			amine biosynthetic process;amine catabolic process;amine metabolic process;behavior;behavioral interaction between organisms;biological regulation;biosynthetic process;carboxylic acid biosynthetic process;carboxylic acid catabolic process;carboxylic acid metabolic process;catabolic process;cell communication;cell-cell signaling;cellular amine metabolic process;cellular amino acid biosynthetic pro…	catalytic activity;glutaminase activity;hydrolase activity;hydrolase activity, acting on carbon-nitrogen (but not peptide) bonds;hydrolase activity, acting on carbon-nitrogen (but not peptide) bonds, in linear amides	cell part;cytoplasmic part;cytosol;intracellular membrane-bounded organelle;intracellular organelle;intracellular part;membrane-bounded organelle;mitochondrion;organelle	Alanine, aspartate and glutamate metabolism;Arginine and proline metabolism;D-Glutamine and D-glutamate metabolism;Nitrogen metabolism;Proximal tubule bicarbonate reclamation	Ank_2;Glutaminase	AACTTT_UNKNOWN;AATGTGA,MIR-23A,MIR-23B;ACOSTA_PROLIFERATION_INDEPENDENT_MYC_TARGETS_UP;BASAKI_YBX1_TARGETS_UP;BLALOCK_ALZHEIMERS_DISEASE_DN;BONOME_OVARIAN_CANCER_SURVIVAL_SUBOPTIMAL_DEBULKING;BOQUEST_STEM_CELL_CULTURED_VS_FRESH_UP;BOYLAN_MULTIPLE_MYELOMA_C_D_UP;BRUECKNER_TARGETS_OF_MIRLET7A3_DN;CAMP_UP.V1_DN;CHANG_CORE_SERUM_RESPONSE_DN;CHARAFE_BREAST_CANCER_LUMINAL_VS_MESENCHYMAL_DN;chr2q32;CONC…	REACT_287745;REACT_309077;REACT_360191	0.000146177	0.000169492	27	24.6535	24.8594	26.0903	23.84	24.8394	24.7168	24.2234	23.9459	4	4	4	4	3.36208	0.00249453	2.61003
E1U8D0	Soga1	SOGA1_MOUSE	Protein SOGA1	18.4155	18.2841	18.1896	18.5406	18.6264	18.9577	18.9598	18.6668	19.5331	19.5221	19.5428	19.4818	19.4127	19.144	19.6493	19.1984	+	+	+			biological regulation;cell surface receptor linked signaling pathway;cellular process;cellular response to chemical stimulus;cellular response to endogenous stimulus;cellular response to hormone stimulus;cellular response to insulin stimulus;cellular response to organic substance;cellular response to peptide hormone stimulus;cellular response to stimulus;enzyme linked receptor protein signaling p…		extracellular membrane-bounded organelle;extracellular organelle;extracellular region part;extracellular space;extracellular vesicular exosome;membrane-bounded organelle;membrane-bounded vesicle;organelle;vesicle		DUF3166;DUF4482			0.000146177	0.000169492	9	18.4329	19.1797	NaN	19.1497	18.3574	18.8027	19.5199	19.3511	4	4	4	4	5.85691	5.40541e-05	5.24759
E9PUL5	Prrt2	PRRT2_MOUSE	Proline-rich transmembrane protein 2	23.3185	23.4789	23.6463	23.1714	23.5936	23.5423	23.4571	23.5477	22.5894	23.4073	23.0272	23.587	23.4194	23.4538	23.2322	22.5022						multicellular organismal process;neurological system process;neuromuscular process;neuromuscular process controlling posture;response to biotic stimulus;response to stimulus;system process		cell junction;cell part;integral to membrane;intrinsic to membrane;membrane;membrane part;plasma membrane;synapse		Dispanin	AACTTT_UNKNOWN;ACCAAAG,MIR-9;BAKKER_FOXO3_TARGETS_DN;CHARAFE_BREAST_CANCER_LUMINAL_VS_BASAL_UP;CHICAS_RB1_TARGETS_SENESCENT;chr16p11;CORRE_MULTIPLE_MYELOMA_DN;CREIGHTON_ENDOCRINE_THERAPY_RESISTANCE_4;CSR_EARLY_UP.V1_DN;CSR_LATE_UP.V1_DN;GACTGTT,MIR-212,MIR-132;GAGCCTG,MIR-484;GGGACCA,MIR-133A,MIR-133B;GGGAGGRR_V$MAZ_Q6;GRADE_COLON_AND_RECTAL_CANCER_DN;GTTNYYNNGGTNA_UNKNOWN;GTTTGTT,MIR-495;KTGGYRS…		0.000146177	0.000169492	6	22.5356	22.9481	23.083	21.0212	23.4038	23.5352	23.1527	23.1519	4	4	4	4	0.508133	0.186834	0.465285
E9PV24	Fga	FIBA_MOUSE	Fibrinogen alpha chain	20.7021	20.2116	20.1486	16.907	20.6871	17.0522	20.7228	21.0412	19.2981	19.992	19.2043	19.3961	16.8004	21.3066	21.2682	21.5219						antibacterial humoral response;antimicrobial humoral response;biological adhesion;biological regulation;blood coagulation;blood coagulation, common pathway;cell adhesion;cell-cell adhesion;cell-matrix adhesion;cell-substrate adhesion;cellular component assembly;cellular component assembly at cellular level;cellular component organization;cellular component organization at cellular level;cellular …	structural molecule activity	blood microparticle;cell cortex;cell part;cell surface;cytoplasmic membrane-bounded vesicle;cytoplasmic part;cytoplasmic vesicle;external side of plasma membrane;extracellular membrane-bounded organelle;extracellular organelle;extracellular region part;extracellular space;extracellular vesicular exosome;fibrinogen complex;intracellular membrane-bounded organelle;intracellular organelle;intracellu…	Complement and coagulation cascades	Fib_alpha;Fibrinogen_aC;Fibrinogen_C	ACEVEDO_LIVER_CANCER_DN;ALFANO_MYC_TARGETS;BIOCARTA_AMI_PATHWAY;BIOCARTA_EXTRINSIC_PATHWAY;BIOCARTA_FIBRINOLYSIS_PATHWAY;BIOCARTA_INTRINSIC_PATHWAY;BOYAULT_LIVER_CANCER_SUBCLASS_G123_DN;CAIRO_LIVER_DEVELOPMENT_DN;CAR_HPX;CAVARD_LIVER_CANCER_MALIGNANT_VS_BENIGN;chr4q28;DAUER_STAT3_TARGETS_UP;EXTRACELLULAR_REGION;EXTRACELLULAR_REGION_PART;EXTRACELLULAR_SPACE;GSE13484_UNSTIM_VS_3H_YF17D_VACCINE_STIM…	REACT_286713;REACT_307071;REACT_316753;REACT_319261;REACT_330010;REACT_332492	0.000146177	0.000169492	9	NaN	19.9958	NaN	20.6488	20.3541	20.8171	19.4726	21.3656	3	3	4	3	0.0390811	0.741486	0.00742526
E9PV86	Mctp1	MCTP1_MOUSE	Multiple C2 and transmembrane domain-containing protein 1	20.3262	20.7313	20.443	20.6575	20.4207	20.6376	20.636	20.4255	20.3892	20.6695	20.5414	20.4708	20.3726	20.3241	20.1507	16.1942							binding;calcium ion binding;cation binding;ion binding;metal ion binding	cell part;integral to membrane;intrinsic to membrane;membrane part		C2;PRT_C	BONOME_OVARIAN_CANCER_SURVIVAL_OPTIMAL_DEBULKING;BOQUEST_STEM_CELL_DN;BOYAULT_LIVER_CANCER_SUBCLASS_G2;CALCIUM_ION_BINDING;CATION_BINDING;CELL_FRACTION;chr5q15;CHYLA_CBFA2T3_TARGETS_UP;DCA_UP.V1_DN;GHANDHI_BYSTANDER_IRRADIATION_UP;GSE11057_CD4_CENT_MEM_VS_PBMC_DN;GSE11057_NAIVE_CD4_VS_PBMC_CD4_TCELL_DN;GSE13229_IMM_VS_MATURE_NKCELL_UP;GSE13306_LAMINA_PROPRIA_VS_SPLEEN_TREG_DN;GSE13306_RA_VS_UNTRE…		0.000146177	0.000169492	11	20.1797	20.7039	NaN	NaN	20.5395	20.53	20.5177	20.2825	4	4	4	3	0.583243	0.0646309	0.0699929
E9PVA8	Gcn1	GCN1_MOUSE	eIF-2-alpha kinase activator GCN1	20.942	21.1512	20.9369	20.9692	21.1406	21.0777	21.067	21.1133	21.2941	21.45	21.45	21.447	21.418	21.3523	21.3728	21.6205	+	+						cell part;cytoplasm;intracellular part;membrane		DUF3554	ABRAMSON_INTERACT_WITH_AIRE;ACEVEDO_NORMAL_TISSUE_ADJACENT_TO_LIVER_TUMOR_UP;BOYLAN_MULTIPLE_MYELOMA_C_D_UP;CAIRO_HEPATOBLASTOMA_CLASSES_UP;CCACACA,MIR-147;chr12q24;DANG_REGULATED_BY_MYC_DN;FOURNIER_ACINAR_DEVELOPMENT_LATE_2;GSE10239_KLRG1INT_VS_KLRG1HIGH_EFF_CD8_TCELL_UP;GSE14308_TH1_VS_TH17_DN;GSE14308_TH2_VS_TH17_UP;GSE22886_NAIVE_BCELL_VS_BLOOD_PLASMA_CELL_DN;GSE22886_NAIVE_CD4_TCELL_VS_12H_A…		0.000146177	0.000169492	50	20.9395	20.8362	22.993	20.525	20.9998	21.0997	21.4103	21.4409	4	4	4	4	4.63146	0.00320715	3.16857
E9PVD3	Dchs1	PCD16_MOUSE	Protocadherin-16	21.9628	21.5704	21.5734	21.8072	21.8252	21.8107	21.8955	21.8523	21.6994	21.4661	21.4191	20.8439	21.2714	20.8207	16.367	21.0211	+					anatomical structure development;anatomical structure morphogenesis;biological adhesion;biological regulation;branching involved in ureteric bud morphogenesis;branching morphogenesis of a tube;cell adhesion;cell differentiation;cell-cell adhesion;cellular developmental process;cellular process;cellular response to stimulus;cochlea development;developmental process;digestive tract development;esta…	binding;calcium ion binding;cation binding;ion binding;metal ion binding	apical part of cell;cell part;integral to membrane;intrinsic to membrane;membrane;membrane part;plasma membrane		Cadherin	ACTTTAT,MIR-142-5P;BONOME_OVARIAN_CANCER_SURVIVAL_SUBOPTIMAL_DEBULKING;BRUINS_UVC_RESPONSE_VIA_TP53_GROUP_A;CACGTG_V$MYC_Q2;CAGCCTC,MIR-485-5P;chr11p15;CTCTGGA,MIR-520A,MIR-525;CTTTGA_V$LEF1_Q2;CTTTGT_V$LEF1_Q2;DOUGLAS_BMI1_TARGETS_UP;GGGAGGRR_V$MAZ_Q6;GGGTGGRR_V$PAX4_03;GSE12845_IGD_POS_BLOOD_VS_PRE_GC_TONSIL_BCELL_UP;GSE12845_IGD_POS_VS_NEG_BLOOD_BCELL_UP;GSE13485_DAY3_VS_DAY7_YF17D_VACCINE_PBM…		0.000146177	0.000169492	5	21.8763	22.0031	NaN	21.4194	21.7284	21.846	21.3571	21.0377	4	4	4	3	0.905971	0.0220469	0.91826
E9PXF8	Sbf2	MTMRD_MOUSE	Myotubularin-related protein 13	20.2033	20.2883	20.3003	20.6103	20.6642	20.7571	20.7038	20.5972	20.5608	20.6267	20.6034	20.2784	20.469	20.3262	20.4586	19.9927	+					biological regulation;cellular component assembly;cellular component organization;cellular component organization or biogenesis;macromolecular complex assembly;macromolecular complex subunit organization;positive regulation of catalytic activity;positive regulation of GTPase activity;positive regulation of hydrolase activity;positive regulation of molecular function;protein complex assembly;prote…	binding;enzyme binding;enzyme regulator activity;GTPase regulator activity;guanyl-nucleotide exchange factor activity;identical protein binding;lipid binding;nucleoside-triphosphatase regulator activity;phosphatase binding;phosphatase regulator activity;phosphatidylinositol binding;phospholipid binding;protein binding;protein dimerization activity;protein homodimerization activity;Rab guanyl-nucl…	cell part;cytoplasmic part;intracellular organelle part;intracellular part;membrane;organelle membrane;organelle part;vacuolar membrane;vacuolar part		dDENN;DENN;GRAM;Myotub-related;PH;SBF2;uDENN	AACTGGA,MIR-145;ACEVEDO_METHYLATED_IN_LIVER_CANCER_DN;ATGAAGG,MIR-205;ATGTTAA,MIR-302C;BASAKI_YBX1_TARGETS_DN;CAGGTG_V$E12_Q6;CASTELLANO_HRAS_TARGETS_DN;CCCNNGGGAR_V$OLF1_01;chr11p15;CREIGHTON_ENDOCRINE_THERAPY_RESISTANCE_3;CTTTGTA,MIR-524;GGGAGGRR_V$MAZ_Q6;GGGCGGR_V$SP1_Q6;GGGTGGRR_V$PAX4_03;GRAESSMANN_APOPTOSIS_BY_DOXORUBICIN_DN;GSE10239_MEMORY_VS_DAY4.5_EFF_CD8_TCELL_UP;GSE13306_RA_VS_UNTREATE…		0.000146177	0.000169492	17	20.2864	21.0724	NaN	19.1951	20.3506	20.6806	20.5173	20.3116	4	4	4	4	1.48843	0.0453772	0.667163
E9PY46	Ift140	IF140_MOUSE	Intraflagellar transport protein 140 homolog	18.6408	18.6602	18.7094	18.8201	18.1861	18.5516	18.6423	18.5226	18.7399	18.9388	18.3879	18.5308	18.7905	18.934	18.4447	18.4777						anatomical structure development;anatomical structure formation involved in morphogenesis;anatomical structure morphogenesis;cell part morphogenesis;cell projection assembly;cell projection morphogenesis;cell projection organization;cellular component assembly;cellular component assembly at cellular level;cellular component assembly involved in morphogenesis;cellular component morphogenesis;cellu…		axoneme;axoneme part;cell part;cell projection;cell projection part;centrosome;cilium;cytoplasmic part;cytoskeletal part;intracellular non-membrane-bounded organelle;intracellular organelle;intracellular organelle part;intracellular part;intraflagellar transport particle A;macromolecular complex;microtubule organizing center;non-membrane-bounded organelle;nonmotile primary cilium;organelle;organe…			CHEMNITZ_RESPONSE_TO_PROSTAGLANDIN_E2_DN;chr16p13;DODD_NASOPHARYNGEAL_CARCINOMA_UP;GARCIA_TARGETS_OF_FLI1_AND_DAX1_UP;GSE11924_TH1_VS_TH17_CD4_TCELL_DN;GSE13493_CD4INTCD8POS_VS_CD8POS_THYMOCYTE_DN;GSE13493_DP_VS_CD4INTCD8POS_THYMOCYTE_UP;GSE1460_DP_THYMOCYTE_VS_NAIVE_CD4_TCELL_CORD_BLOOD_DN;GSE15750_DAY6_VS_DAY10_TRAF6KO_EFF_CD8_TCELL_DN;GSE15767_MED_VS_SCS_MAC_LN_DN;GSE17721_0.5H_VS_8H_CPG_BMDM_…	REACT_278699;REACT_361683	0.000146177	0.000169492	7	18.7323	19.2645	NaN	18.8569	18.7076	18.4756	18.6494	18.6617	4	4	4	4	0.380802	0.395622	0.178599
E9PYH6	Setd1a	SET1A_MOUSE	Histone-lysine N-methyltransferase SETD1A	16.7211	18.74	18.877	18.7393	18.8437	19.169	19.093	18.9295	16.6434	18.9016	18.9789	18.6204	19.0309	18.6136	19.1479	17.7757						biological regulation;cellular component organization;cellular component organization at cellular level;cellular component organization or biogenesis;cellular component organization or biogenesis at cellular level;cellular macromolecule metabolic process;cellular metabolic process;cellular process;cellular protein metabolic process;chromatin modification;chromatin organization;chromatin remodelin…	binding;catalytic activity;histone methyltransferase activity;histone methyltransferase activity (H3-K4 specific);histone-lysine N-methyltransferase activity;lysine N-methyltransferase activity;methyltransferase activity;N-methyltransferase activity;nucleic acid binding;nucleotide binding;protein methyltransferase activity;protein-lysine N-methyltransferase activity;S-adenosylmethionine-dependent…	cell part;chromatin;chromatin remodeling complex;chromosomal part;euchromatin;histone methyltransferase complex;intracellular membrane-bounded organelle;intracellular organelle;intracellular organelle part;intracellular part;macromolecular complex;membrane-bounded organelle;methyltransferase complex;nuclear chromatin;nuclear chromosome part;nuclear euchromatin;nuclear part;nucleoplasm;nucleoplasm…	Lysine degradation	N-SET;RRM_1;SET	ACTTTAT,MIR-142-5P;AFFAR_YY1_TARGETS_DN;BYSTRYKH_HEMATOPOIESIS_STEM_CELL_QTL_TRANS;chr16p11;FLECHNER_PBL_KIDNEY_TRANSPLANT_OK_VS_DONOR_UP;FLECHNER_PBL_KIDNEY_TRANSPLANT_REJECTED_VS_OK_DN;GCM_GSPT1;GCM_NF2;GINESTIER_BREAST_CANCER_ZNF217_AMPLIFIED_DN;GSE14308_TH1_VS_NAIVE_CD4_TCELL_DN;GSE14308_TH17_VS_NATURAL_TREG_DN;GSE14308_TH2_VS_NAIVE_CD4_TCELL_DN;GSE1460_DP_THYMOCYTE_VS_THYMIC_STROMAL_CELL_UP;…	REACT_278269	0.000146177	0.000169492	8	18.6522	18.1304	NaN	19.6222	18.7855	19.0088	18.8336	18.642	3	4	3	4	0.254857	0.284831	0.0073893
E9PYL2	Prr12	PRR12_MOUSE	Proline-rich protein 12	16.7211	16.8303	18.4729	16.907	18.819	19.1283	16.7683	17.0574	19.6829	19.6767	19.7436	19.7484	19.6113	19.3966	19.249	16.1942	+	+					binding;DNA binding;nucleic acid binding			DUF4211	chr19q13;GSE12366_GC_VS_NAIVE_BCELL_DN;GSE13306_RA_VS_UNTREATED_TREG_UP;GSE14308_NAIVE_CD4_TCELL_VS_INDUCED_TREG_DN;GSE17974_0H_VS_48H_IN_VITRO_ACT_CD4_TCELL_UP;GSE17974_CTRL_VS_ACT_IL4_AND_ANTI_IL12_1H_CD4_TCELL_UP;GSE2706_UNSTIM_VS_2H_R848_DC_UP;GSE28237_EARLY_VS_LATE_GC_BCELL_DN;GSE36392_EOSINOPHIL_VS_MAC_IL25_TREATED_LUNG_DN;GSE36392_MAC_VS_NEUTROPHIL_IL25_TREATED_LUNG_UP;ZHOU_INFLAMMATORY_RE…		0.000146177	0.000169492	5	NaN	NaN	NaN	NaN	18.4729	18.9737	19.7129	19.419	1	2	4	3	1.38086	0.00778319	3.00361
E9PZ19	Igsf9b	TUTLB_MOUSE	Protein turtle homolog B	20.4404	20.6793	20.9222	20.9918	20.9186	21.1614	21.2015	21.319	20.3268	20.8653	20.4761	21.1674	21.0462	20.9196	20.9112	21.2682						biological adhesion;biological regulation;cell adhesion;cell-cell adhesion;cellular chemical homeostasis;cellular homeostasis;cellular ion homeostasis;cellular process;chemical homeostasis;homeostatic process;homophilic cell adhesion;ion homeostasis;membrane hyperpolarization;positive regulation of inhibitory postsynaptic membrane potential;regulation of biological quality;regulation of inhibitor…	binding;enzyme binding;kinase binding;protein binding	cell body;cell part;cell projection;dendrite;inhibitory synapse;neuron projection;neuronal cell body;synapse		fn3;I-set;V-set	CAR_MLANA;CAR_MYST2;CAR_TNFRSF25;CAR_WBSCR22;chr11q25;CTIP_DN.V1_DN;GSE3982_MAC_VS_NKCELL_DN;GSE3982_MAC_VS_TH1_DN;GSE3982_MAC_VS_TH2_DN;GSE8515_IL1_VS_IL6_4H_STIM_)MAC_DN;MORF_ARAF1;MORF_CASP2;MORF_CNTN1;MORF_DDX11;MORF_FANCG;MORF_FDXR;MORF_IKBKG;MORF_JAK3;MORF_LTK;MORF_ORC1L;MORF_PDPK1;MORF_PHB;MORF_PML;MORF_PTPN9;MORF_RAGE;MORF_RBBP8;MORF_RBM8A;MORF_RPA2;PUJANA_ATM_PCC_NETWORK;PUJANA_BRCA1_PCC…		0.000146177	0.000169492	8	20.1896	20.8065	NaN	NaN	20.7584	21.1501	20.7089	21.0363	4	4	4	4	1.05798	0.0548935	0.0781892
E9PZJ8	Ascc3	ASCC3_MOUSE	Activating signal cointegrator 1 complex subunit 3	18.9488	18.806	18.9206	19.4008	19.0392	19.2419	16.7683	19.0687	19.0517	19.2832	19.5512	19.1086	19.0526	18.742	16.367	19.514						biological regulation;biosynthetic process;cell proliferation;cellular biosynthetic process;cellular macromolecule biosynthetic process;cellular macromolecule metabolic process;cellular metabolic process;cellular nitrogen compound metabolic process;cellular process;DNA conformation change;DNA dealkylation;DNA dealkylation involved in DNA repair;DNA duplex unwinding;DNA geometric change;DNA metabo…	3'-5' DNA helicase activity;adenyl nucleotide binding;adenyl ribonucleotide binding;ATP binding;ATPase activity;ATPase activity, coupled;ATP-dependent 3'-5' DNA helicase activity;ATP-dependent DNA helicase activity;ATP-dependent helicase activity;binding;catalytic activity;DNA helicase activity;DNA-dependent ATPase activity;helicase activity;hydrolase activity;hydrolase activity, acting on acid a…	cell part;cytoplasm;cytoplasmic part;Golgi apparatus;intracellular;intracellular membrane-bounded organelle;intracellular organelle;intracellular part;membrane;membrane-bounded organelle;nucleus;organelle		DEAD;Helicase_C;Sec63	chr6q16;DACOSTA_UV_RESPONSE_VIA_ERCC3_COMMON_DN;DACOSTA_UV_RESPONSE_VIA_ERCC3_DN;DAVICIONI_MOLECULAR_ARMS_VS_ERMS_UP;DODD_NASOPHARYNGEAL_CARCINOMA_DN;FRASOR_RESPONSE_TO_SERM_OR_FULVESTRANT_UP;GARY_CD5_TARGETS_DN;GGGCGGR_V$SP1_Q6;GHANDHI_DIRECT_IRRADIATION_UP;GSE12845_IGD_NEG_BLOOD_VS_PRE_GC_TONSIL_BCELL_UP;GSE13485_CTRL_VS_DAY1_YF17D_VACCINE_PBMC_UP;GSE14308_TH2_VS_TH1_UP;GSE1432_1H_VS_24H_IFNG_M…		0.000146177	0.000169492	6	18.4695	19.0537	NaN	17.7174	19.0191	19.1166	19.2487	19.1029	4	3	4	3	0.251416	0.278489	0.635612
E9PZM4	Chd2	CHD2_MOUSE	Chromodomain-helicase-DNA-binding protein 2	19.7963	19.6315	19.6679	19.7098	19.5579	19.796	19.9094	19.6357	20.1954	20.0164	20.1921	19.8944	19.9835	19.5471	19.3411	18.5505	+	+				anatomical structure development;biological regulation;biosynthetic process;cell differentiation;cellular biosynthetic process;cellular component organization;cellular component organization at cellular level;cellular component organization or biogenesis;cellular component organization or biogenesis at cellular level;cellular developmental process;cellular macromolecule biosynthetic process;cellu…	adenyl nucleotide binding;adenyl ribonucleotide binding;ATP binding;binding;catalytic activity;core promoter binding;core promoter sequence-specific DNA binding;DNA binding;helicase activity;histone binding;hydrolase activity;hydrolase activity, acting on acid anhydrides;hydrolase activity, acting on acid anhydrides, in phosphorus-containing anhydrides;nucleic acid binding;nucleoside-triphosphata…	cell part;extracellular membrane-bounded organelle;extracellular organelle;extracellular region part;extracellular vesicular exosome;intracellular membrane-bounded organelle;intracellular non-membrane-bounded organelle;intracellular organelle;intracellular organelle part;intracellular part;membrane-bounded organelle;membrane-bounded vesicle;non-membrane-bounded organelle;nuclear part;nucleolus;nu…		Chromo;DUF4208;Helicase_C;SNF2_N	AAANWWTGC_UNKNOWN;AACTTT_UNKNOWN;AMUNDSON_RESPONSE_TO_ARSENITE;ATP_DEPENDENT_DNA_HELICASE_ACTIVITY;ATP_DEPENDENT_HELICASE_ACTIVITY;ATPASE_ACTIVITY;ATPASE_ACTIVITY_COUPLED;BENPORATH_NANOG_TARGETS;BIOPOLYMER_METABOLIC_PROCESS;BLALOCK_ALZHEIMERS_DISEASE_INCIPIENT_UP;BLALOCK_ALZHEIMERS_DISEASE_UP;BRCA1_DN.V1_DN;BRUINS_UVC_RESPONSE_EARLY_LATE;CAGGTG_V$E12_Q6;CCAWYNNGAAR_UNKNOWN;CHARAFE_BREAST_CANCER_L…		0.000146177	0.000169492	14	19.5803	19.8096	20.2149	18.0057	19.7014	19.7247	20.0746	19.3555	4	4	4	4	1.25741	0.0261576	2.42802
E9PZQ0	Ryr1	RYR1_MOUSE	Ryanodine receptor 1	20.1002	20.4215	20.3154	20.5426	19.8446	19.6208	19.5319	19.6541	19.9072	20.0782	19.7445	20.1026	20.0912	20.1246	19.8262	16.1942						anatomical structure development;anatomical structure morphogenesis;biological regulation;calcium ion homeostasis;calcium ion transport;calcium ion transport into cytosol;cation homeostasis;cation transport;cell development;cellular calcium ion homeostasis;cellular cation homeostasis;cellular chemical homeostasis;cellular developmental process;cellular divalent inorganic cation homeostasis;cellul…	binding;calcium channel activity;calcium-release channel activity;cation channel activity;cation transmembrane transporter activity;channel activity;enzyme binding;gated channel activity;intracellular ligand-gated calcium channel activity;intracellular ligand-gated ion channel activity;ion channel activity;ion transmembrane transporter activity;ligand-gated channel activity;ligand-gated ion chann…	cell cortex;cell part;contractile fiber part;cytoplasm;cytoplasmic part;endoplasmic reticulum;endoplasmic reticulum membrane;endoplasmic reticulum part;extracellular membrane-bounded organelle;extracellular organelle;extracellular region part;extracellular vesicular exosome;I band;integral to membrane;intracellular membrane-bounded organelle;intracellular organelle;intracellular organelle part;in…	Calcium signaling pathway;Long-term depression	Ins145_P3_rec;Ion_trans;MIR;RIH_assoc;RR_TM4-6;RYDR_ITPR;RyR;SPRY	ACCTGTTG_UNKNOWN;BRUINS_UVC_RESPONSE_VIA_TP53_GROUP_A;BRUINS_UVC_RESPONSE_VIA_TP53_GROUP_B;CAFFAREL_RESPONSE_TO_THC_24HR_3_DN;CAGCTG_V$AP4_Q5;CAGGTG_V$E12_Q6;CALCIUM_CHANNEL_ACTIVITY;CALCIUM_ION_TRANSPORT;CATION_CHANNEL_ACTIVITY;CATION_TRANSMEMBRANE_TRANSPORTER_ACTIVITY;CATION_TRANSPORT;chr19q13;CYTOPLASM;CYTOPLASMIC_PART;DAIRKEE_CANCER_PRONE_RESPONSE_E2;DARWICHE_PAPILLOMA_RISK_HIGH_UP;DARWICHE_P…	REACT_346473	0.000146177	0.000169492	12	20.0919	19.7641	NaN	NaN	20.3449	19.6629	19.9581	20.014	4	4	4	3	0.477276	0.0988734	1.66443
E9Q1P8	Irf2bp2	I2BP2_MOUSE	Interferon regulatory factor 2-binding protein 2	18.7087	17.9585	17.8816	16.907	18.5694	18.8524	18.633	17.0574	18.5405	18.4175	18.9049	19.1555	18.4051	18.8342	18.7257	16.1942		+				biological regulation;biosynthetic process;cellular biosynthetic process;cellular macromolecule biosynthetic process;cellular macromolecule metabolic process;cellular metabolic process;cellular nitrogen compound metabolic process;cellular process;macromolecule biosynthetic process;macromolecule metabolic process;metabolic process;negative regulation of biological process;negative regulation of bi…	binding;cation binding;ion binding;metal ion binding;protein binding transcription factor activity;transcription cofactor activity;transcription corepressor activity;transcription factor binding transcription factor activity	cell part;cytoplasm;intracellular membrane-bounded organelle;intracellular organelle;intracellular organelle part;intracellular part;membrane-bounded organelle;nuclear part;nucleoplasm;nucleus;organelle;organelle part		IRF-2BP1_2	BASAKI_YBX1_TARGETS_DN;BOYLAN_MULTIPLE_MYELOMA_D_UP;CHANDRAN_METASTASIS_TOP50_UP;chr1q42;CUI_TCF21_TARGETS_2_DN;FULCHER_INFLAMMATORY_RESPONSE_LECTIN_VS_LPS_UP;GARY_CD5_TARGETS_UP;GCM_HBP1;GSE10239_MEMORY_VS_DAY4.5_EFF_CD8_TCELL_UP;GSE10239_MEMORY_VS_KLRG1INT_EFF_CD8_TCELL_UP;GSE10239_NAIVE_VS_DAY4.5_EFF_CD8_TCELL_UP;GSE10239_NAIVE_VS_KLRG1HIGH_EFF_CD8_TCELL_UP;GSE10239_NAIVE_VS_KLRG1INT_EFF_CD8_T…		0.000146177	0.000169492	3	18.6901	NaN	NaN	18.6927	18.1829	18.6849	18.7546	18.655	3	3	4	3	0.2978	0.233395	1.14937
E9Q3C1	C2cd2	C2CD2_MOUSE	C2 domain-containing protein 2	16.7211	17.8141	16.8675	18.3633	16.7711	17.0522	16.7683	17.0574	19.3741	19.1751	19.1999	18.8877	19.1041	19.0277	18.7007	16.1942	+	+	+					cell part;cytoplasmic part;cytosol;intracellular membrane-bounded organelle;intracellular organelle;intracellular part;membrane-bounded organelle;nucleus;organelle			ACCAAAG,MIR-9;ACTTTAT,MIR-142-5P;AGCACTT,MIR-93,MIR-302A,MIR-302B,MIR-302C,MIR-302D,MIR-372,MIR-373,MIR-520E,MIR-520A,MIR-526B,MIR-520B,MIR-520C,MIR-520D;BERTUCCI_MEDULLARY_VS_DUCTAL_BREAST_CANCER_UP;BMI1_DN_MEL18_DN.V1_UP;chr21q22;CYTOPLASM;DACOSTA_UV_RESPONSE_VIA_ERCC3_COMMON_DN;DACOSTA_UV_RESPONSE_VIA_ERCC3_DN;DOUGLAS_BMI1_TARGETS_DN;EIF4E_DN;ELVIDGE_HYPOXIA_DN;FORTSCHEGGER_PHF8_TARGETS_DN;GCA…		0.000146177	0.000169492	4	NaN	NaN	NaN	NaN	18.0887	NaN	19.1592	18.9442	2	0	4	3	1.99395	0.00320115	2.26991
E9Q3L2	Pi4ka	PI4KA_MOUSE	Phosphatidylinositol 4-kinase alpha	21.9733	22.1652	22.025	22.2	22.1531	22.1256	22.1901	21.997	21.6169	21.7109	21.7286	21.7444	21.7534	21.8483	21.3114	21.5518	+	+	+			actin cytoskeleton organization;actin filament-based process;biological regulation;cellular component organization;cellular component organization at cellular level;cellular component organization or biogenesis;cellular component organization or biogenesis at cellular level;cellular lipid metabolic process;cellular metabolic process;cellular process;cellular response to stimulus;cytoskeleton orga…	1-phosphatidylinositol 4-kinase activity;catalytic activity;inositol or phosphatidylinositol kinase activity;kinase activity;lipid kinase activity;phosphatidylinositol kinase activity;phosphotransferase activity, alcohol group as acceptor;transferase activity;transferase activity, transferring phosphorus-containing groups	adherens junction;anchoring junction;cell junction;cell part;cell-substrate adherens junction;cell-substrate junction;cytoplasm;extracellular membrane-bounded organelle;extracellular organelle;extracellular region part;extracellular vesicular exosome;focal adhesion;intracellular part;membrane;membrane-bounded organelle;membrane-bounded vesicle;organelle;plasma membrane;vesicle	Inositol phosphate metabolism;Phosphatidylinositol signaling system	PI3_PI4_kinase;PI3Ka	BIOSYNTHETIC_PROCESS;BLALOCK_ALZHEIMERS_DISEASE_DN;CELL_CELL_SIGNALING;CELLULAR_LIPID_METABOLIC_PROCESS;CERIBELLI_PROMOTERS_INACTIVE_AND_BOUND_BY_NFY;CHARAFE_BREAST_CANCER_LUMINAL_VS_BASAL_UP;chr22q11;CYTOPLASM;CYTOPLASMIC_MEMBRANE_BOUND_VESICLE;CYTOPLASMIC_PART;CYTOPLASMIC_VESICLE;GLYCEROPHOSPHOLIPID_BIOSYNTHETIC_PROCESS;GLYCEROPHOSPHOLIPID_METABOLIC_PROCESS;GOLGI_APPARATUS;GOLGI_APPARATUS_PART;…	REACT_325171;REACT_335457	0.000146177	0.000169492	53	21.5961	21.5482	23.8273	20.2189	22.0909	22.1164	21.7002	21.6162	4	4	4	4	3.45496	0.00360343	3.1462
Q8R3P0	Aspa	ACY2_MOUSE	Aspartoacylase	22.1031	22.9981	22.3503	22.4865	23.2556	22.7625	22.9155	22.9148	21.7819	21.9839	21.9731	22.2349	22.3435	22.6819	22.0449	22.6212	+					acetate metabolic process;axon ensheathment;axon ensheathment in central nervous system;biological regulation;carboxylic acid metabolic process;cellular ketone metabolic process;cellular metabolic process;cellular process;central nervous system myelination;ensheathment of neurons;metabolic process;monocarboxylic acid metabolic process;myelination;organic acid metabolic process;oxoacid metabolic p…	aminoacylase activity;aspartoacylase activity;binding;catalytic activity;cation binding;hydrolase activity;hydrolase activity, acting on carbon-nitrogen (but not peptide) bonds;hydrolase activity, acting on carbon-nitrogen (but not peptide) bonds, in linear amides;hydrolase activity, acting on ester bonds;ion binding;metal ion binding	cell part;cytoplasm;cytoplasmic part;cytosol;extracellular membrane-bounded organelle;extracellular organelle;extracellular region part;extracellular vesicular exosome;intracellular membrane-bounded organelle;intracellular organelle;intracellular part;membrane-bounded organelle;membrane-bounded vesicle;nucleus;organelle;vesicle	Alanine, aspartate and glutamate metabolism;Histidine metabolism	AstE_AspA	AAANWWTGC_UNKNOWN;ACEVEDO_FGFR1_TARGETS_IN_PROSTATE_CANCER_MODEL_UP;AMINE_CATABOLIC_PROCESS;AMINE_METABOLIC_PROCESS;AMINO_ACID_AND_DERIVATIVE_METABOLIC_PROCESS;AMINO_ACID_CATABOLIC_PROCESS;AMINO_ACID_METABOLIC_PROCESS;ASTON_MAJOR_DEPRESSIVE_DISORDER_DN;BOQUEST_STEM_CELL_CULTURED_VS_FRESH_UP;BOQUEST_STEM_CELL_UP;BOYAULT_LIVER_CANCER_SUBCLASS_G123_DN;BRCA1_DN.V1_DN;BROWNE_HCMV_INFECTION_30MIN_UP;BR…		0.000146177	0.000169492	13	22.4025	22.9316	NaN	22.4333	22.4845	22.9621	21.9934	22.4229	4	4	4	4	2.51691	0.00361306	1.2347
Q80VL1	Tdrkh	TDRKH_MOUSE	Tudor and KH domain-containing protein	21.1602	20.8722	20.9264	20.825	20.5778	20.9989	20.7652	21.04	21.2027	21.2792	21.1704	21.0219	21.0679	21.0548	20.8144	20.7218						biological regulation;cell cycle phase;cell cycle process;cell differentiation;cellular developmental process;cellular macromolecule metabolic process;cellular metabolic process;cellular nitrogen compound metabolic process;cellular process;cellular process involved in reproduction;developmental process;DNA alkylation;DNA metabolic process;DNA methylation;DNA methylation involved in gamete generat…	binding;nucleic acid binding;RNA binding	cell part;cytoplasm;cytoplasmic part;cytosol;intracellular membrane-bounded organelle;intracellular non-membrane-bounded organelle;intracellular organelle;intracellular part;macromolecular complex;membrane-bounded organelle;mitochondrion;non-membrane-bounded organelle;organelle;P granule;pi-body;piP-body;ribonucleoprotein complex;RNA granule		KH_1;TUDOR	CAGGTG_V$E12_Q6;chr1q21;DOUGLAS_BMI1_TARGETS_DN;GATTGGY_V$NFY_Q6_01;GAUSSMANN_MLL_AF4_FUSION_TARGETS_A_UP;GCANCTGNY_V$MYOD_Q6;GGGCGGR_V$SP1_Q6;GSE14000_UNSTIM_VS_16H_LPS_DC_TRANSLATED_RNA_UP;GSE14000_UNSTIM_VS_4H_LPS_DC_TRANSLATED_RNA_UP;GSE14308_TH2_VS_TH17_DN;GSE15324_NAIVE_VS_ACTIVATED_ELF4_KO_CD8_TCELL_DN;GSE17974_CTRL_VS_ACT_IL4_AND_ANTI_IL12_2H_CD4_TCELL_UP;GSE17974_IL4_AND_ANTI_IL12_VS_UNT…	REACT_362602	0.000146177	0.000169492	8	20.9595	20.7515	NaN	21.4873	20.946	20.8455	21.1685	20.9147	4	4	4	4	1.0792	0.102588	1.28668
E9Q4P1	Wdfy1	WDFY1_MOUSE	WD repeat and FYVE domain-containing protein 1	16.7211	20.5075	19.7184	16.907	16.7711	20.2487	20.5996	20.5082	20.0536	20.268	20.568	20.4502	16.8004	20.5575	19.4176	20.1532		+					1-phosphatidylinositol binding;binding;cation binding;ion binding;lipid binding;metal ion binding;phosphatidylinositol binding;phospholipid binding	cell part;cytoplasmic part;cytosol;early endosome;endosome;intracellular membrane-bounded organelle;intracellular organelle;intracellular part;membrane-bounded organelle;nucleus;organelle		FYVE;WD40	CADWELL_ATG16L1_TARGETS_UP;CAGCTG_V$AP4_Q5;CHANDRAN_METASTASIS_UP;chr2q36;COLDREN_GEFITINIB_RESISTANCE_DN;CREIGHTON_ENDOCRINE_THERAPY_RESISTANCE_3;CUI_TCF21_TARGETS_2_DN;CYTOPLASM;CYTOPLASMIC_PART;CYTOSOL;DOUGLAS_BMI1_TARGETS_UP;EARLY_ENDOSOME;ENDOSOME;GARY_CD5_TARGETS_UP;GGTGTGT,MIR-329;GOBERT_OLIGODENDROCYTE_DIFFERENTIATION_DN;GSE13493_DP_VS_CD8POS_THYMOCYTE_DN;GSE14350_IL2RB_KO_VS_WT_TEFF_UP;G…		0.000146177	0.000169492	10	NaN	NaN	22.6254	20.271	20.113	20.4521	20.3349	20.0427	2	3	4	3	0.350794	0.147643	0.987971
E9Q5C9	Nolc1	NOLC1_MOUSE	Nucleolar and coiled-body phosphoprotein 1	23.2115	22.9692	22.8172	22.9569	22.6105	22.5114	22.4434	22.6724	22.3603	22.649	22.6124	22.2985	22.3628	22.4194	22.1234	22.4367	+	+				cellular component organization;cellular component organization at cellular level;cellular component organization or biogenesis;cellular component organization or biogenesis at cellular level;cellular process;nucleolus organization;nucleus organization;organelle organization		Cajal body;cell part;intracellular non-membrane-bounded organelle;intracellular organelle;intracellular organelle part;intracellular part;macromolecular complex;non-membrane-bounded organelle;nuclear body;nuclear part;nucleolus;nucleoplasm;nucleoplasm part;organelle;organelle part;ribonucleoprotein complex;small nuclear ribonucleoprotein complex		SRP40_C	ACOSTA_PROLIFERATION_INDEPENDENT_MYC_TARGETS_UP;BENPORATH_ES_1;BENPORATH_NANOG_TARGETS;BHAT_ESR1_TARGETS_NOT_VIA_AKT1_UP;BHAT_ESR1_TARGETS_VIA_AKT1_UP;BILD_HRAS_ONCOGENIC_SIGNATURE;BILD_MYC_ONCOGENIC_SIGNATURE;BIOPOLYMER_METABOLIC_PROCESS;BLALOCK_ALZHEIMERS_DISEASE_DN;BLALOCK_ALZHEIMERS_DISEASE_UP;BOYLAN_MULTIPLE_MYELOMA_C_D_UP;BROWN_MYELOID_CELL_DEVELOPMENT_DN;CAIRO_HEPATOBLASTOMA_CLASSES_UP;CAS…		0.000146177	0.000169492	7	22.9098	22.6539	24.2445	23.2999	22.9887	22.5594	22.48	22.3356	4	4	4	4	3.51686	0.00323864	2.25782
P59997	Kdm2a	KDM2A_MOUSE	Lysine-specific demethylase 2A	18.6111	18.1518	18.7669	18.7082	18.8151	18.8853	18.6279	18.9012	18.8387	19.036	18.8059	18.6629	18.351	18.1905	17.6683	16.1942	+		+			biological regulation;biosynthetic process;cellular biosynthetic process;cellular component organization;cellular component organization at cellular level;cellular component organization or biogenesis;cellular component organization or biogenesis at cellular level;cellular macromolecule biosynthetic process;cellular macromolecule metabolic process;cellular metabolic process;cellular nitrogen comp…	binding;catalytic activity;cation binding;demethylase activity;DNA binding;histone demethylase activity;histone demethylase activity (H3-K36 specific);ion binding;metal ion binding;nucleic acid binding;oxidoreductase activity;oxidoreductase activity, acting on paired donors, with incorporation or reduction of molecular oxygen;oxidoreductase activity, acting on paired donors, with incorporation or…	cell part;chromatin;chromosomal part;intracellular membrane-bounded organelle;intracellular non-membrane-bounded organelle;intracellular organelle;intracellular organelle part;intracellular part;membrane-bounded organelle;non-membrane-bounded organelle;nuclear chromatin;nuclear chromosome part;nuclear part;nucleolus;nucleoplasm;nucleus;organelle;organelle part		F-box;JmjC;zf-CXXC	AAAGGGA,MIR-204,MIR-211;AACTTT_UNKNOWN;AAGCAAT,MIR-137;AAGCACA,MIR-218;AGGGCAG,MIR-18A;AMUNDSON_RESPONSE_TO_ARSENITE;BENPORATH_NANOG_TARGETS;BLALOCK_ALZHEIMERS_DISEASE_UP;BUYTAERT_PHOTODYNAMIC_THERAPY_STRESS_UP;CAGCTG_V$AP4_Q5;CAIRO_HEPATOBLASTOMA_CLASSES_DN;chr11q13;CTTTGCA,MIR-527;DAZARD_RESPONSE_TO_UV_SCC_DN;DEURIG_T_CELL_PROLYMPHOCYTIC_LEUKEMIA_DN;GAGCCTG,MIR-484;GCAAAAA,MIR-129;GCACCTT,MIR-1…		0.000146177	0.000169492	7	18.4175	18.5253	NaN	17.655	18.5595	18.8074	18.8359	18.0699	4	4	4	3	1.74385	0.00617726	0.874164
B2RXR6	Ankrd44	ANR44_MOUSE	Serine/threonine-protein phosphatase 6 regulatory ankyrin repeat subunit B	22.0346	21.7894	21.3373	21.8406	22.0943	22.1121	21.9011	21.9605	22.4184	22.0097	22.21	21.6849	21.338	21.8534	21.6168	21.6407	+									Ank;Ank_2;Ank_3	BERNARD_PPAPDC1B_TARGETS_UP;chr2q33;CTTTGA_V$LEF1_Q2;GATAAGR_V$GATA_C;GCNP_SHH_UP_EARLY.V1_DN;GOBERT_OLIGODENDROCYTE_DIFFERENTIATION_DN;GSE10094_LCMV_VS_LISTERIA_IND_EFF_CD4_TCELL_UP;GSE12366_PLASMA_CELL_VS_MEMORY_BCELL_DN;GSE14308_TH1_VS_TH17_UP;GSE14308_TH17_VS_NATURAL_TREG_DN;GSE16522_ANTI_CD3CD28_STIM_VS_UNSTIM_MEMORY_CD8_TCELL_DN;GSE17721_12H_VS_24H_PAM3CSK4_BMDM_DN;GSE17721_4_VS_24H_CPG_BMD…		0.000146177	0.000169492	7	21.8492	21.8087	NaN	22.5993	21.7505	22.017	22.0807	21.6122	4	4	4	4	1.22621	0.0402891	0.756838
E9Q6B2	Ccdc85c	CC85C_MOUSE	Coiled-coil domain-containing protein 85C	21.1156	21.2072	21.0719	20.9265	20.6264	20.5851	20.8417	20.7909	20.0366	20.6969	20.6214	20.9085	20.8988	20.6328	20.6878	20.8227	+	+				anatomical structure development;cerebral cortex development;developmental process		apical junction complex;cell junction;cell-cell junction;occluding junction;tight junction		DUF2216	AMBROSINI_FLAVOPIRIDOL_TREATMENT_TP53;FORTSCHEGGER_PHF8_TARGETS_DN;GHANDHI_DIRECT_IRRADIATION_DN;GSE11057_CD4_EFF_MEM_VS_PBMC_UP;GSE12366_NAIVE_VS_MEMORY_BCELL_DN;GSE17974_IL4_AND_ANTI_IL12_VS_UNTREATED_12H_ACT_CD4_TCELL_UP;GSE29615_CTRL_VS_DAY3_LAIV_IFLU_VACCINE_PBMC_UP;GSE37416_CTRL_VS_3H_F_TULARENSIS_LVS_NEUTROPHIL_UP;KRIEG_HYPOXIA_NOT_VIA_KDM3A;LOCKWOOD_AMPLIFIED_IN_LUNG_CANCER;MODULE_136;MOD…		0.000146177	0.000169492	8	20.8105	NaN	NaN	20.6474	21.0803	20.711	20.5658	20.7605	4	4	4	4	1.49371	0.0290265	1.40879
E9Q6J5	Bod1l	BD1L1_MOUSE	Biorientation of chromosomes in cell division protein 1-like 1	18.9337	18.8743	18.6518	19.0168	18.9553	19.2035	19.3611	19.2404	19.2608	19.6103	19.4016	19.0127	19.5112	19.052	18.7103	18.2425		+					binding;DNA binding;nucleic acid binding	cell part;intracellular organelle part;intracellular part;nuclear part;nucleoplasm;organelle part			BERENJENO_ROCK_SIGNALING_NOT_VIA_RHOA_DN;BILD_CTNNB1_ONCOGENIC_SIGNATURE;BURTON_ADIPOGENESIS_12;CHANDRAN_METASTASIS_UP;chr4p16;GCM_BCL2L1;GCM_CASP2;GCM_CHUK;GCM_DENR;GCM_DFFA;GCM_GSPT1;GCM_ING1;GCM_MLL;GCM_NF2;GCM_RAN;GCM_TINF2;GCM_USP6;GSE14308_TH2_VS_NATURAL_TREG_DN;GSE17721_CTRL_VS_LPS_0.5H_BMDM_UP;GSE17721_LPS_VS_POLYIC_6H_BMDM_UP;GSE17721_POLYIC_VS_GARDIQUIMOD_0.5H_BMDM_UP;GSE17721_POLYIC_VS…		0.000146177	0.000169492	14	18.6629	19.337	20.9788	18.9053	18.8692	19.1901	19.3214	18.879	4	4	4	4	0.789173	0.0822371	1.6531
E9Q6P5	Ttc7b	TTC7B_MOUSE	Tetratricopeptide repeat protein 7B	22.1529	22.1563	22.3267	22.1923	22.398	22.372	22.2856	22.335	21.4918	21.7844	21.8777	21.8457	21.7812	22.0041	21.2569	21.5519	+	+	+								AATGTGA,MIR-23A,MIR-23B;ACATTCC,MIR-1,MIR-206;ACEVEDO_FGFR1_TARGETS_IN_PROSTATE_CANCER_MODEL_DN;ATGTACA,MIR-493;ATGTTAA,MIR-302C;BYSTRYKH_HEMATOPOIESIS_STEM_CELL_QTL_CIS;CACCAGC,MIR-138;chr14q32;CREIGHTON_ENDOCRINE_THERAPY_RESISTANCE_2;CTGTTAC,MIR-194;FONTAINE_FOLLICULAR_THYROID_ADENOMA_DN;GAVIN_FOXP3_TARGETS_CLUSTER_P4;GSE11864_CSF1_IFNG_VS_CSF1_PAM3CYS_IN_MAC_DN;GSE17721_CTRL_VS_GARDIQUIMOD_0.5…		0.000146177	0.000169492	16	21.7297	22.0367	21.7923	20.6602	22.207	22.3476	21.7499	21.6485	4	4	4	4	3.36422	0.00312111	2.47974
E9Q735	Ube4a	UBE4A_MOUSE	Ubiquitin conjugation factor E4 A	19.7368	20.0521	19.8889	20.0766	19.8991	20.1047	19.8335	19.9727	19.476	19.9258	19.857	19.9376	20.0099	19.9915	19.4843	19.9871						catabolic process;cellular catabolic process;cellular macromolecule catabolic process;cellular macromolecule metabolic process;cellular metabolic process;cellular process;cellular protein metabolic process;macromolecule catabolic process;macromolecule metabolic process;macromolecule modification;metabolic process;modification-dependent macromolecule catabolic process;modification-dependent protei…	acid-amino acid ligase activity;catalytic activity;ligase activity;ligase activity, forming carbon-nitrogen bonds;small conjugating protein ligase activity;ubiquitin-protein ligase activity;ubiquitin-ubiquitin ligase activity	cell part;cytoplasm;intracellular part;macromolecular complex;protein complex;ubiquitin ligase complex	Ubiquitin mediated proteolysis	U-box;Ufd2P_core	ACATTCC,MIR-1,MIR-206;ACTGTGA,MIR-27A,MIR-27B;ACTTTAT,MIR-142-5P;ATAAGCT,MIR-21;ATACTGT,MIR-144;BIOPOLYMER_CATABOLIC_PROCESS;BIOPOLYMER_METABOLIC_PROCESS;CATABOLIC_PROCESS;CELLULAR_CATABOLIC_PROCESS;CELLULAR_MACROMOLECULE_CATABOLIC_PROCESS;CELLULAR_MACROMOLECULE_METABOLIC_PROCESS;CELLULAR_PROTEIN_CATABOLIC_PROCESS;CELLULAR_PROTEIN_METABOLIC_PROCESS;chr11q23;CTTGTAT,MIR-381;DIAZ_CHRONIC_MEYLOGENOU…	REACT_343568	0.000146177	0.000169492	13	19.77	19.7127	21.3144	19.4325	19.9386	19.9525	19.7991	19.8682	4	4	4	4	0.1727	0.646496	0.467836
E9Q784	Zc3h13	ZC3HD_MOUSE	Zinc finger CCCH domain-containing protein 13	18.3099	18.5374	18.966	18.7189	19.0202	19.0102	19.2111	18.5065	19.5688	19.7041	19.3238	19.1116	19.4904	19.16	19.4001	18.1079	+	+					binding;cation binding;ion binding;metal ion binding			zf-CCCH	BRUINS_UVC_RESPONSE_VIA_TP53_GROUP_D;chr13q14;DOANE_RESPONSE_TO_ANDROGEN_UP;GSE10239_MEMORY_VS_DAY4.5_EFF_CD8_TCELL_UP;GSE10239_MEMORY_VS_KLRG1INT_EFF_CD8_TCELL_UP;GSE13484_12H_VS_3H_YF17D_VACCINE_STIM_PBMC_DN;GSE14350_TREG_VS_TEFF_IN_IL2RB_KO_UP;GSE14769_UNSTIM_VS_60MIN_LPS_BMDM_DN;GSE15659_CD45RA_NEG_CD4_TCELL_VS_ACTIVATED_TREG_DN;GSE15659_NAIVE_CD4_TCELL_VS_ACTIVATED_TREG_DN;GSE15659_NONSUPPRE…		0.000146177	0.000169492	13	19.0485	19.2379	NaN	19.841	18.6331	18.937	19.4271	19.0396	4	4	4	4	1.02487	0.0344882	2.22196
Q8C5L6	Inpp5k	INP5K_MOUSE	Inositol polyphosphate 5-phosphatase K	20.4172	20.4763	20.4375	20.5534	20.6608	20.2606	20.6989	20.6749	19.8937	20.2576	19.6552	20.005	20.8097	20.7934	20.5922	19.9585	+	+				biological regulation;carbohydrate homeostasis;carbohydrate metabolic process;catabolic process;cell surface receptor linked signaling pathway;cellular carbohydrate metabolic process;cellular lipid metabolic process;cellular metabolic process;cellular process;cellular response to cAMP;cellular response to chemical stimulus;cellular response to cytokine stimulus;cellular response to endogenous sti…	binding;catalytic activity;G-protein coupled receptor activity;hydrolase activity;hydrolase activity, acting on ester bonds;inositol 1,3,4,5-tetrakisphosphate 5-phosphatase activity;inositol bisphosphate phosphatase activity;inositol or phosphatidylinositol phosphatase activity;inositol phosphate phosphatase activity;inositol tetrakisphosphate phosphatase activity;inositol trisphosphate phosphata…	cell part;cell projection;cell projection membrane;cell projection part;cytoplasm;cytoplasmic part;cytosol;endoplasmic reticulum;Golgi apparatus part;intracellular membrane-bounded organelle;intracellular organelle;intracellular organelle part;intracellular part;leading edge membrane;membrane;membrane part;membrane-bounded organelle;neuron projection;nucleus;organelle;organelle part;perinuclear r…	Inositol phosphate metabolism;Phosphatidylinositol signaling system	Exo_endo_phos	AAAYWAACM_V$HFH4_01;BAELDE_DIABETIC_NEPHROPATHY_UP;BENPORATH_CYCLING_GENES;BLALOCK_ALZHEIMERS_DISEASE_INCIPIENT_UP;BLALOCK_ALZHEIMERS_DISEASE_UP;CACTGCC,MIR-34A,MIR-34C,MIR-449;CAGGTA_V$AREB6_01;CELL_PROJECTION;chr17p13;CYTOPLASM;CYTOPLASMIC_PART;CYTOSOL;GATAAGR_V$GATA_C;GAUSSMANN_MLL_AF4_FUSION_TARGETS_G_UP;GGCACAT,MIR-455;GOBERT_CORE_OLIGODENDROCYTE_DIFFERENTIATION;GOBERT_OLIGODENDROCYTE_DIFFER…	REACT_272541	0.000146177	0.000169492	5	NaN	NaN	NaN	20.7132	20.4711	20.5738	19.9529	20.5384	4	4	4	4	1.755	0.0137663	2.16179
E9Q7G0	Numa1	NUMA1_MOUSE	Nuclear mitotic apparatus protein 1	21.8127	21.658	21.9778	21.7858	21.9691	22.0547	22.2108	22.1609	21.9191	22.1769	22.025	22.1934	22.2464	22.2001	22.247	21.027						cell cycle;cell cycle process;cell differentiation;cellular component organization;cellular component organization at cellular level;cellular component organization or biogenesis;cellular component organization or biogenesis at cellular level;cellular developmental process;cellular process;cytoskeleton organization;developmental process;epithelial cell differentiation;establishment of localizatio…	binding;cytoskeletal protein binding;protein binding;tubulin binding	apical part of cell;cell body;cell part;cell projection;cytoplasm;cytoplasmic part;cytoskeletal part;dendrite;extracellular membrane-bounded organelle;extracellular organelle;extracellular region part;extracellular vesicular exosome;Golgi apparatus part;Golgi membrane;intracellular membrane-bounded organelle;intracellular organelle;intracellular organelle part;intracellular part;macromolecular co…			ACTAYRNNNCCCR_UNKNOWN;BAE_BRCA1_TARGETS_DN;BILANGES_SERUM_SENSITIVE_VIA_TSC2;BIOCARTA_HIVNEF_PATHWAY;BIOCARTA_RANMS_PATHWAY;BLALOCK_ALZHEIMERS_DISEASE_INCIPIENT_UP;BLALOCK_ALZHEIMERS_DISEASE_UP;BROWNE_HCMV_INFECTION_14HR_DN;BROWNE_HCMV_INFECTION_18HR_DN;CAGGTA_V$AREB6_01;CELL_CYCLE_GO_0007049;CELL_CYCLE_PHASE;CELL_CYCLE_PROCESS;chr11q13;CTCTGGA,MIR-520A,MIR-525;CYTOSKELETAL_PART;CYTOSKELETON;DE_Y…	REACT_332968	0.000146177	0.000169492	53	21.8728	21.5334	22.5865	21.0798	21.8086	22.0989	22.0786	21.9301	4	4	4	4	0.255393	0.415307	1.57166
E9Q7X7	Nrxn2	NRX2A_MOUSE	Neurexin-2	20.7846	21.0225	21.3876	21.3548	21.3269	21.0642	21.2325	20.9304	20.8682	21.1671	21.1725	21.4914	21.2025	21.2552	21.6041	21.9611						adult behavior;auditory behavior;behavior;behavioral interaction between organisms;biological regulation;cell communication;cell-cell signaling;cellular component assembly;cellular component assembly at cellular level;cellular component organization;cellular component organization at cellular level;cellular component organization or biogenesis;cellular component organization or biogenesis at cell…	binding;calcium channel regulator activity;cation binding;channel regulator activity;ion binding;metal ion binding	cell part;integral to membrane;intrinsic to membrane;macromolecular complex;membrane;membrane part;presynaptic membrane;protein complex;synapse part;synaptic membrane		Laminin_G_2;Syndecan	ATF2_UP.V1_UP;BLALOCK_ALZHEIMERS_DISEASE_UP;CACTGCC,MIR-34A,MIR-34C,MIR-449;CAGGTA_V$AREB6_01;CGCAAAA,MIR-450;CHEOK_RESPONSE_TO_HD_MTX_DN;chr11q13;DAVICIONI_MOLECULAR_ARMS_VS_ERMS_DN;DCA_UP.V1_UP;GCAAAAA,MIR-129;GCANCTGNY_V$MYOD_Q6;GGGAGGRR_V$MAZ_Q6;GNF2_RTN1;GSE10239_NAIVE_VS_MEMORY_CD8_TCELL_DN;GSE10325_MYELOID_VS_LUPUS_MYELOID_UP;GSE11864_CSF1_VS_CSF1_IFNG_IN_MAC_UP;GSE18791_CTRL_VS_NEWCASTLE_…		0.000146177	0.000169492	15	20.775	20.9537	NaN	19.6675	21.1374	21.1385	21.1748	21.5057	4	4	4	4	0.653045	0.144795	0.0697027
E9Q8I9	Fry	FRY_MOUSE	Protein furry homolog	20.8796	21.0497	20.812	21.0978	20.9311	20.9489	21.047	20.7352	21.2043	21.3615	21.3253	21.1382	21.3131	21.0153	20.9329	20.7875								cell part;cytoplasm;cytoplasmic part;cytoskeletal part;intracellular organelle part;intracellular part;microtubule organizing center;organelle part;spindle pole		MOR2-PAG1_C;MOR2-PAG1_mid;MOR2-PAG1_N	AAAGGGA,MIR-204,MIR-211;ACCAAAG,MIR-9;AKL_HTLV1_INFECTION_DN;ATF2_UP.V1_DN;ATGCTGG,MIR-338;BAELDE_DIABETIC_NEPHROPATHY_DN;BENPORATH_MYC_MAX_TARGETS;BILBAN_B_CLL_LPL_UP;BROWNE_HCMV_INFECTION_10HR_DN;BROWNE_HCMV_INFECTION_20HR_DN;BROWNE_HCMV_INFECTION_6HR_DN;CAGGTA_V$AREB6_01;CAIRO_HEPATOBLASTOMA_CLASSES_DN;CAMP_UP.V1_DN;CHICAS_RB1_TARGETS_CONFLUENT;chr13q13;CREIGHTON_ENDOCRINE_THERAPY_RESISTANCE_3…		0.000146177	0.000169492	24	20.4241	20.6014	23.2134	19.6957	20.9598	20.9156	21.2573	21.0122	4	4	4	4	1.43147	0.0586684	1.87989
E9QAT4	Sec16a	SC16A_MOUSE	Protein transport protein Sec16A	20.995	20.9832	20.835	21.0816	20.8799	21.0238	21.0024	20.9936	21.2186	21.3795	21.3255	21.1564	21.1966	21.2639	21.1284	20.9994	+					cellular component organization;cellular component organization at cellular level;cellular component organization or biogenesis;cellular component organization or biogenesis at cellular level;cellular process;COPII vesicle coating;endoplasmic reticulum organization;organelle organization;vesicle coating;vesicle organization		cell part;cytoplasm;cytoplasmic part;cytosol;Golgi apparatus;Golgi apparatus part;Golgi membrane;intracellular membrane-bounded organelle;intracellular organelle;intracellular organelle part;intracellular part;membrane;membrane-bounded organelle;organelle;organelle membrane;organelle part		Sec16;Sec16_C	BROWNE_HCMV_INFECTION_1HR_DN;BROWNE_HCMV_INFECTION_48HR_DN;BYSTRYKH_HEMATOPOIESIS_STEM_CELL_QTL_TRANS;CAFFAREL_RESPONSE_TO_THC_24HR_5_DN;CHARAFE_BREAST_CANCER_LUMINAL_VS_BASAL_UP;chr9q34;DEBIASI_APOPTOSIS_BY_REOVIRUS_INFECTION_DN;GSE15750_DAY6_VS_DAY10_EFF_CD8_TCELL_DN;GSE15750_DAY6_VS_DAY10_TRAF6KO_EFF_CD8_TCELL_DN;GSE17721_0.5H_VS_12H_POLYIC_BMDM_UP;GSE17721_0.5H_VS_4H_LPS_BMDM_UP;GSE17721_0.5H…		0.000146177	0.000169492	30	20.8509	21.0109	NaN	21.4897	20.9737	20.9749	21.27	21.1471	4	4	4	4	2.64166	0.0252557	2.20697
F6SEU4	Syngap1	SYGP1_MOUSE	Ras/Rap GTPase-activating protein SynGAP	21.7206	21.6995	21.7045	21.8434	21.6029	21.189	20.9992	21.0419	21.2253	21.3422	21.5922	21.2197	21.195	21.1926	20.7502	21.3761	+	+				anatomical structure development;associative learning;behavior;biological regulation;cell projection organization;cellular component organization;cellular component organization at cellular level;cellular component organization or biogenesis;cellular component organization or biogenesis at cellular level;cellular localization;cellular macromolecule localization;cellular membrane organization;cell…	enzyme activator activity;enzyme regulator activity;GTPase activator activity;GTPase regulator activity;nucleoside-triphosphatase regulator activity	cell junction;cell part;cell projection part;cytoplasm;dendritic shaft;intracellular part;intrinsic to internal side of plasma membrane;intrinsic to membrane;intrinsic to plasma membrane;membrane;membrane part;plasma membrane part		C2;DUF3498;RasGAP	AAGCCAT,MIR-135A,MIR-135B;ACGCACA,MIR-210;CCCAGAG,MIR-326;chr6p21;CTAGGAA,MIR-384;GACAATC,MIR-219;GACAGGG,MIR-339;GGCGGCA,MIR-371;GGGGCCC,MIR-296;GSE14000_TRANSLATED_RNA_VS_MRNA_4H_LPS_DC_DN;GSE17974_0H_VS_0.5H_IN_VITRO_ACT_CD4_TCELL_UP;GTACTGT,MIR-101;GTGGTGA,MIR-197;MODULE_163;MODULE_48;MODULE_9;MODULE_95;PID_RAS_PATHWAY;TATCTGG,MIR-488;TCCCCAC,MIR-491;TCTCTCC,MIR-185;YOSHIMURA_MAPK8_TARGETS_UP…		0.000146177	0.000169492	33	21.6077	21.2628	23.8302	20.1224	21.742	21.2083	21.3448	21.1285	4	4	4	4	2.14148	0.0101034	2.26616
F6ZDS4	Tpr	TPR_MOUSE	Nucleoprotein TPR	21.6186	21.3452	21.5105	21.5142	21.3841	21.5581	21.6173	21.6823	21.5026	21.6494	21.5692	21.6295	21.6507	21.6208	21.5924	20.8799						biological regulation;cell cycle checkpoint;cell cycle phase;cell cycle process;cell division;cellular component organization;cellular component organization at cellular level;cellular component organization or biogenesis;cellular component organization or biogenesis at cellular level;cellular macromolecular complex subunit organization;cellular process;cellular response to chemical stimulus;cell…	binding;chromatin binding;cytoskeletal protein binding;dynein complex binding;enzyme binding;heat shock protein binding;identical protein binding;kinase binding;mitogen-activated protein kinase binding;mRNA binding;nucleic acid binding;nucleocytoplasmic transporter activity;protein binding;protein complex binding;protein dimerization activity;protein homodimerization activity;protein kinase bindi…	cell part;chromosomal part;cytoplasm;cytoplasmic dynein complex;cytoplasmic part;cytoskeletal part;dynein complex;envelope;extrinsic to membrane;inclusion body;intracellular membrane-bounded organelle;intracellular non-membrane-bounded organelle;intracellular organelle;intracellular organelle part;intracellular part;kinetochore;macromolecular complex;membrane;membrane part;membrane-bounded organe…	MAPK signaling pathway - yeast;Pathways in cancer;RNA transport;Thyroid cancer	TPR_MLP1_2	ATTCTTT,MIR-186;BENPORATH_MYC_MAX_TARGETS;BOYAULT_LIVER_CANCER_SUBCLASS_G1_UP;BRUINS_UVC_RESPONSE_LATE;CELLULAR_LOCALIZATION;CHIBA_RESPONSE_TO_TSA_DN;CHICAS_RB1_TARGETS_GROWING;CHICAS_RB1_TARGETS_SENESCENT;chr1q25;CYTOPLASM;DELASERNA_MYOD_TARGETS_DN;DORSAM_HOXA9_TARGETS_DN;ENDOMEMBRANE_SYSTEM;ENK_UV_RESPONSE_KERATINOCYTE_DN;ENVELOPE;ESTABLISHMENT_OF_CELLULAR_LOCALIZATION;ESTABLISHMENT_OF_LOCALIZA…	REACT_272921;REACT_280637;REACT_329153;REACT_341634;REACT_360954	0.000146177	0.000169492	50	21.7239	21.4703	22.2911	22.1716	21.4971	21.5605	21.5877	21.436	4	4	4	4	0.133242	0.696744	0.66549
A2AAY5	Sh3pxd2b	SPD2B_MOUSE	SH3 and PX domain-containing protein 2B	19.3208	19.7176	16.8675	19.3076	19.3749	19.8103	19.5054	19.4978	19.9397	19.7329	19.6945	19.2692	19.2506	19.1452	18.5051	19.3645						adipose tissue development;anatomical structure development;biological regulation;bone development;cell differentiation;cellular component assembly;cellular component disassembly;cellular component disassembly at cellular level;cellular component organization;cellular component organization at cellular level;cellular component organization or biogenesis;cellular component organization or biogenes…	binding;lipid binding;phosphatidylinositol binding;phosphatidylinositol-3,5-bisphosphate binding;phosphatidylinositol-3-phosphate binding;phosphatidylinositol-4-phosphate binding;phosphatidylinositol-5-phosphate binding;phospholipid binding;protein binding;protein domain specific binding;SH2 domain binding	cell junction;cell part;cell projection;cytoplasm;cytoskeletal part;intracellular non-membrane-bounded organelle;intracellular organelle;intracellular organelle part;intracellular part;macromolecular complex;non-membrane-bounded organelle;organelle;organelle part;podosome;protein complex		PX;SH3_1;SH3_2	ACEVEDO_METHYLATED_IN_LIVER_CANCER_DN;chr5q35;GSE14350_TREG_VS_TEFF_DN;GSE15324_NAIVE_VS_ACTIVATED_CD8_TCELL_DN;GSE15659_TREG_VS_TCONV_UP;GSE7460_CTRL_VS_TGFB_TREATED_ACT_FOXP3_MUT_TCONV_UP;GTGCCAA,MIR-96;IVANOVA_HEMATOPOIESIS_STEM_CELL_AND_PROGENITOR;LINDVALL_IMMORTALIZED_BY_TERT_DN;LIU_PROSTATE_CANCER_DN;PATIL_LIVER_CANCER;RICKMAN_TUMOR_DIFFERENTIATED_MODERATELY_VS_POORLY_UP;RICKMAN_TUMOR_DIFFE…		0.000146177	0.000169492	4	19.253	19.3554	NaN	NaN	19.4487	19.5471	19.6591	19.0663	3	4	4	4	0.505417	0.104461	0.607292
F8VQB6	Myo10	MYO10_MOUSE	Unconventional myosin-X	17.8955	18.2769	18.0907	17.8817	16.7711	17.0522	16.7683	17.0574	16.6434	17.3907	17.892	18.0506	17.5333	17.9796	18.0505	16.1942	+			+		biological regulation;cell motility;cellular component movement;cellular process;cytoskeleton-dependent intracellular transport;establishment of localization;establishment of localization in cell;intracellular transport;locomotion;metabolic process;positive regulation of biological process;positive regulation of cell adhesion;positive regulation of cell-cell adhesion;positive regulation of cellul…	actin binding;actin filament binding;actin-dependent ATPase activity;adenyl nucleotide binding;adenyl ribonucleotide binding;ATP binding;ATPase activity;ATPase activity, coupled;binding;catalytic activity;cytoskeletal protein binding;hydrolase activity;hydrolase activity, acting on acid anhydrides;hydrolase activity, acting on acid anhydrides, in phosphorus-containing anhydrides;lipid binding;mic…	cell body;cell cortex;cell part;cell projection;cell projection membrane;cell projection part;cytoplasm;cytoplasmic part;cytoskeletal part;cytosol;filopodium;filopodium membrane;filopodium tip;intracellular non-membrane-bounded organelle;intracellular organelle;intracellular organelle part;intracellular part;lamellipodium;macromolecular complex;membrane;membrane part;myosin complex;neuron project…	Fc gamma R-mediated phagocytosis	FERM_M;IQ;Myosin_head;MyTH4;PH	AAAGGGA,MIR-204,MIR-211;ACEVEDO_LIVER_CANCER_DN;ACEVEDO_LIVER_TUMOR_VS_NORMAL_ADJACENT_TISSUE_DN;ACEVEDO_METHYLATED_IN_LIVER_CANCER_DN;AGCATTA,MIR-155;ATGTAGC,MIR-221,MIR-222;BERENJENO_TRANSFORMED_BY_RHOA_DN;BLALOCK_ALZHEIMERS_DISEASE_INCIPIENT_UP;BLALOCK_ALZHEIMERS_DISEASE_UP;BOQUEST_STEM_CELL_CULTURED_VS_FRESH_UP;BOQUEST_STEM_CELL_DN;BROWNE_HCMV_INFECTION_14HR_DN;chr5p15;CTTTGT_V$LEF1_Q2;CUI_TC…	REACT_344463	0.000146177	0.000169492	7	17.6267	NaN	NaN	NaN	18.0362	NaN	17.7778	17.8545	4	0	3	3	1.07038	0.0231303	0.819274
G3X939	Slc9a3	SL9A3_MOUSE	Sodium/hydrogen exchanger 3	18.5511	18.7517	18.9642	19.1332	18.1071	18.3767	18.1943	18.1375	18.6051	18.7676	18.8425	18.5292	18.4912	18.5753	18.0282	16.1942	+					biological regulation;cation homeostasis;cation transport;cellular process;chemical homeostasis;establishment of localization;homeostatic process;ion homeostasis;ion transmembrane transport;ion transport;metal ion transport;monovalent inorganic cation homeostasis;monovalent inorganic cation transport;regulation of biological quality;regulation of pH;sodium ion transmembrane transport;sodium ion t…	active transmembrane transporter activity;antiporter activity;binding;cation transmembrane transporter activity;cation:cation antiporter activity;hydrogen ion transmembrane transporter activity;inorganic cation transmembrane transporter activity;ion transmembrane transporter activity;metal ion transmembrane transporter activity;monovalent cation:hydrogen antiporter activity;monovalent inorganic c…	apical plasma membrane;brush border membrane;cell part;cell projection membrane;cell projection part;extracellular membrane-bounded organelle;extracellular organelle;extracellular region part;extracellular vesicular exosome;integral to membrane;intrinsic to membrane;membrane;membrane part;membrane-bounded organelle;membrane-bounded vesicle;organelle;plasma membrane;plasma membrane part;vesicle	Bile secretion;Mineral absorption;Protein digestion and absorption;Proximal tubule bicarbonate reclamation	Na_H_Exchanger	ACTIVE_TRANSMEMBRANE_TRANSPORTER_ACTIVITY;ANTIPORTER_ACTIVITY;BENPORATH_EED_TARGETS;BENPORATH_ES_WITH_H3K27ME3;BENPORATH_PRC2_TARGETS;BENPORATH_SUZ12_TARGETS;BROWNE_HCMV_INFECTION_18HR_DN;CATION_TRANSMEMBRANE_TRANSPORTER_ACTIVITY;chr5p15;GSE13306_RA_VS_UNTREATED_TCONV_UP;GSE18791_CTRL_VS_NEWCASTLE_VIRUS_DC_10H_DN;GSE18791_CTRL_VS_NEWCASTLE_VIRUS_DC_12H_DN;GSE18791_CTRL_VS_NEWCASTLE_VIRUS_DC_18H_D…	REACT_324002	0.000146177	0.000169492	2	18.6602	18.0461	NaN	NaN	18.8501	18.2039	18.6861	18.3649	4	4	4	3	1.00578	0.0260087	0.518353
G3X9J0	Sipa1l3	SI1L3_MOUSE	Signal-induced proliferation-associated 1-like protein 3	19.9693	19.9664	19.9726	20.2554	19.9796	20.2434	20.2805	20.3571	20.3576	20.4251	20.3877	20.2728	20.3937	20.1903	19.987	19.5038						cell differentiation;cellular developmental process;cellular process;developmental process;hemopoietic progenitor cell differentiation	enzyme activator activity;enzyme regulator activity;GTPase activator activity;GTPase regulator activity;nucleoside-triphosphatase regulator activity	extracellular region part;extracellular space		DUF3401;Rap_GAP	ACTGTGA,MIR-27A,MIR-27B;AGCACTT,MIR-93,MIR-302A,MIR-302B,MIR-302C,MIR-302D,MIR-372,MIR-373,MIR-520E,MIR-520A,MIR-526B,MIR-520B,MIR-520C,MIR-520D;ATGTACA,MIR-493;ATGTTTC,MIR-494;CHEBOTAEV_GR_TARGETS_DN;chr19q13;CTACTGT,MIR-199A;FURUKAWA_DUSP6_TARGETS_PCI35_DN;GCACTTT,MIR-17-5P,MIR-20A,MIR-106A,MIR-106B,MIR-20B,MIR-519D;GSE10325_LUPUS_CD4_TCELL_VS_LUPUS_BCELL_DN;GSE11864_CSF1_VS_CSF1_PAM3CYS_IN_MAC…		0.000146177	0.000169492	12	20.3155	20.2301	NaN	19.2568	20.0409	20.2151	20.3608	20.0187	4	4	4	4	0.812747	0.121722	2.18399
Q91V76		CK054_MOUSE	Ester hydrolase C11orf54 homolog	20.7884	21.1051	21.054	21.038	21.2004	21.216	21.4789	21.4617	21.5039	21.5177	21.5247	21.6538	21.9135	21.7342	21.8208	21.5588	+	+				metabolic process	binding;catalytic activity;cation binding;hydrolase activity;hydrolase activity, acting on ester bonds;ion binding;metal ion binding;transition metal ion binding;zinc ion binding	cell part;extracellular membrane-bounded organelle;extracellular organelle;extracellular region part;extracellular vesicular exosome;intracellular membrane-bounded organelle;intracellular organelle;intracellular part;membrane-bounded organelle;membrane-bounded vesicle;nucleus;organelle;vesicle		DUF1907			0.000146177	0.000169492	11	21.1007	21.0834	22.7886	21.6353	20.9963	21.3392	21.55	21.7568	4	4	4	4	4.61729	0.00149565	3.37875
G3XA57	Rab11fip2	RFIP2_MOUSE	Rab11 family-interacting protein 2	20.2806	20.1787	20.0947	20.5326	20.2396	20.1317	20.292	20.2372	20.8649	20.4951	20.8124	20.5473	20.5722	20.3656	20.2021	20.5182	+					biological regulation;cellular process;establishment of cell polarity;establishment of localization;establishment of localization in cell;establishment or maintenance of cell polarity;exocytosis;hormone secretion;hormone transport;insulin secretion;insulin secretion involved in cellular response to glucose stimulus;peptide hormone secretion;peptide secretion;peptide transport;regulated secretory …	binding;enzyme binding;GTPase binding;identical protein binding;kinase binding;protein binding;protein dimerization activity;protein homodimerization activity;protein kinase binding;Rab GTPase binding;Ras GTPase binding;small GTPase binding	cell part;cytoplasmic part;endosomal part;endosome;endosome membrane;intracellular membrane-bounded organelle;intracellular organelle;intracellular organelle part;intracellular part;membrane;membrane-bounded organelle;nuclear part;nucleoplasm;organelle;organelle membrane;organelle part;plasma membrane;recycling endosome membrane	Endocytosis	C2;RBD-FIP	AATGTGA,MIR-23A,MIR-23B;AGCATTA,MIR-155;ATACCTC,MIR-202;ATATGCA,MIR-448;ATGCTGC,MIR-103,MIR-107;CHANG_CORE_SERUM_RESPONSE_DN;CHIANG_LIVER_CANCER_SUBCLASS_CTNNB1_UP;chr10q26;CTGTTAC,MIR-194;CTTGTAT,MIR-381;DEBIASI_APOPTOSIS_BY_REOVIRUS_INFECTION_UP;GABRIELY_MIR21_TARGETS;GCACCTT,MIR-18A,MIR-18B;GEORGES_TARGETS_OF_MIR192_AND_MIR215;GOBERT_OLIGODENDROCYTE_DIFFERENTIATION_DN;GSE13306_TREG_VS_TCONV_UP…	REACT_286837	0.000146177	0.000169492	5	20.6293	20.5529	NaN	19.0827	20.2717	20.2251	20.6799	20.4145	4	4	4	4	2.13779	0.0169019	1.66101
G5E829	Atp2b1	AT2B1_MOUSE	Plasma membrane calcium-transporting ATPase 1	23.7077	24.0938	24.216	23.8787	24.0329	23.9381	23.9596	23.9435	23.7124	24.0856	23.8802	24.2375	24.1898	24.1944	24.0936	23.3991						calcium ion transport;cation transport;divalent inorganic cation transport;divalent metal ion transport;establishment of localization;ion transport;metal ion transport;transport	active transmembrane transporter activity;adenyl nucleotide binding;adenyl ribonucleotide binding;ATP binding;ATPase activity;ATPase activity, coupled;ATPase activity, coupled to movement of substances;ATPase activity, coupled to transmembrane movement of ions;ATPase activity, coupled to transmembrane movement of ions, phosphorylative mechanism;ATPase activity, coupled to transmembrane movement o…	cell junction;cell part;extracellular membrane-bounded organelle;extracellular organelle;extracellular region part;extracellular vesicular exosome;integral to membrane;integral to plasma membrane;intracellular membrane-bounded organelle;intracellular organelle;intracellular part;intrinsic to membrane;intrinsic to plasma membrane;membrane;membrane part;membrane-bounded organelle;membrane-bounded v…	Calcium signaling pathway;Pancreatic secretion;Salivary secretion	ATP_Ca_trans_C;Cation_ATPase_C;Cation_ATPase_N;E1-E2_ATPase;Hydrolase	AAAGGGA,MIR-204,MIR-211;AACTGAC,MIR-223;ACAACTT,MIR-382;ACTGTGA,MIR-27A,MIR-27B;ACTIVE_TRANSMEMBRANE_TRANSPORTER_ACTIVITY;ACTTTAT,MIR-142-5P;AGCATTA,MIR-155;AGUIRRE_PANCREATIC_CANCER_COPY_NUMBER_DN;ATAACCT,MIR-154;ATACTGT,MIR-144;ATGCTGG,MIR-338;ATPASE_ACTIVITY;ATPASE_ACTIVITY_COUPLED;ATPASE_ACTIVITY_COUPLED_TO_MOVEMENT_OF_SUBSTANCES;ATPASE_ACTIVITY_COUPLED_TO_TRANSMEMBRANE_MOVEMENT_OF_IONS;ATPAS…	REACT_327885;REACT_338561	0.000146177	0.000169492	26	23.61	23.8236	23.8527	21.4601	23.9741	23.9685	23.9789	23.9692	4	4	4	4	3.62615e-05	0.999827	0.0101007
P63085	Mapk1	MK01_MOUSE	Mitogen-activated protein kinase 1	25.1288	24.9794	25.0495	24.965	25.0025	24.9555	24.8919	24.856	25.018	24.8272	25.2022	24.9887	24.8795	24.8396	24.4645	24.6171	+					activation of immune response;anatomical structure development;anatomical structure formation involved in morphogenesis;anatomical structure morphogenesis;antigen receptor-mediated signaling pathway;apoptosis;B cell receptor signaling pathway;biological regulation;biosynthetic process;blood vessel development;caveolin-mediated endocytosis;cell cycle;cell death;cell proliferation;cell surface rece…	adenyl nucleotide binding;adenyl ribonucleotide binding;ATP binding;binding;catalytic activity;enzyme binding;kinase activity;MAP kinase activity;molecular transducer activity;nucleotide binding;phosphatase binding;phosphoprotein binding;phosphotransferase activity, alcohol group as acceptor;phosphotyrosine binding;protein binding;protein kinase activity;protein phosphorylated amino acid binding;…	adherens junction;anchoring junction;axon;caveola;cell junction;cell part;cell projection;cell projection cytoplasm;cell projection part;cell-substrate adherens junction;cell-substrate junction;cytoplasm;cytoplasmic part;cytoskeletal part;cytoskeleton;cytosol;dendrite cytoplasm;early endosome;endosome;extracellular membrane-bounded organelle;extracellular organelle;extracellular region part;extra…	Acute myeloid leukemia;Adherens junction;Aldosterone-regulated sodium reabsorption;Alzheimer's disease;Axon guidance;B cell receptor signaling pathway;Bladder cancer;Chagas disease (American trypanosomiasis);Chemokine signaling pathway;Chronic myeloid leukemia;Colorectal cancer;Dorso-ventral axis formation;Endometrial cancer;ErbB signaling pathway;Fc epsilon RI signaling pathway;Fc gamma R-mediat…	Pkinase	ACTGCCT,MIR-34B;AMIT_EGF_RESPONSE_480_MCF10A;APOPTOSIS_GO;ATGCAGT,MIR-217;ATGTACA,MIR-493;ATTCTTT,MIR-186;BEHAVIOR;BHATI_G2M_ARREST_BY_2METHOXYESTRADIOL_UP;BIDUS_METASTASIS_UP;BIOCARTA_AGR_PATHWAY;BIOCARTA_ARENRF2_PATHWAY;BIOCARTA_AT1R_PATHWAY;BIOCARTA_BAD_PATHWAY;BIOCARTA_BARR_MAPK_PATHWAY;BIOCARTA_BARRESTIN_SRC_PATHWAY;BIOCARTA_BIOPEPTIDES_PATHWAY;BIOCARTA_CCR3_PATHWAY;BIOCARTA_CDK5_PATHWAY;BIO…	REACT_272921;REACT_275222;REACT_293022;REACT_299247;REACT_305463;REACT_306352;REACT_310086;REACT_314186;REACT_317434;REACT_320943;REACT_323000;REACT_327612;REACT_337888;REACT_339798;REACT_339940;REACT_342554;REACT_344463;REACT_350665;REACT_353300;REACT_353319;REACT_353475;REACT_357393;REACT_357788;REACT_357826;REACT_357953;REACT_358477;REACT_358608;REACT_359435;REACT_359980;REACT_361608	0.000146177	0.000169492	12	24.8476	24.738	21.9162	24.4914	25.0307	24.9265	25.009	24.7002	4	4	4	4	1.77925	0.0427225	0.0923045
G5E897	Poglut3	PLGT3_MOUSE	Protein O-glucosyltransferase 3	18.4916	18.9701	16.8675	16.907	19.8821	17.0522	19.1462	17.0574	18.7139	16.8503	18.6078	18.7029	19.0976	19.2646	18.1926	18.8737										Filamin;Glyco_transf_90	BRUINS_UVC_RESPONSE_LATE;CHARAFE_BREAST_CANCER_LUMINAL_VS_MESENCHYMAL_DN;CHICAS_RB1_TARGETS_CONFLUENT;CHICAS_RB1_TARGETS_SENESCENT;CHYLA_CBFA2T3_TARGETS_UP;CREIGHTON_ENDOCRINE_THERAPY_RESISTANCE_5;DOUGLAS_BMI1_TARGETS_UP;FREDERICK_PRKCI_TARGETS;GEORGES_TARGETS_OF_MIR192_AND_MIR215;GSE14308_TH2_VS_NATURAL_TREG_UP;GSE15750_DAY6_VS_DAY10_EFF_CD8_TCELL_UP;GSE2706_R848_VS_LPS_2H_STIM_DC_DN;GSE27786_CD…		0.000146177	0.000169492	4	NaN	NaN	NaN	18.8	18.7309	19.5141	18.6749	18.8571	2	2	3	4	0.238619	0.2857	0.233593
G5E8B9	Zbtb11	ZBT11_MOUSE	Zinc finger and BTB domain-containing protein 11	16.7211	18.0073	18.724	16.907	18.4235	17.0522	18.5037	18.6905	18.7443	18.0183	18.1796	18.8223	18.7035	18.1722	18.6045	16.1942							binding;cation binding;ion binding;metal ion binding;nucleic acid binding	cell part;intracellular organelle part;intracellular part;nuclear part;nucleoplasm;organelle part		BTB;zf-C2H2	AAAYRNCTG_UNKNOWN;AAGCACA,MIR-218;AAGCACT,MIR-520F;AGCACTT,MIR-93,MIR-302A,MIR-302B,MIR-302C,MIR-302D,MIR-372,MIR-373,MIR-520E,MIR-520A,MIR-526B,MIR-520B,MIR-520C,MIR-520D;ATGTACA,MIR-493;BILD_SRC_ONCOGENIC_SIGNATURE;BROCKE_APOPTOSIS_REVERSED_BY_IL6;CACGTG_V$MYC_Q2;CCGNMNNTNACG_UNKNOWN;chr3q12;DACOSTA_UV_RESPONSE_VIA_ERCC3_DN;ENK_UV_RESPONSE_EPIDERMIS_DN;ERB2_UP.V1_DN;GCCATNTTG_V$YY1_Q6;GCGNNANTT…		0.000146177	0.000169492	5	18.6596	NaN	NaN	NaN	18.3656	18.5392	18.4411	18.4934	2	3	4	3	0.244871	0.292364	0.828186
G5E8K5	Ank3	ANK3_MOUSE	Ankyrin-3	22.598	22.5447	22.606	22.6009	22.6415	22.5515	22.4925	22.5901	22.0943	22.172	22.1044	22.2045	22.2194	22.2587	21.854	22.3268	+	+				anatomical structure morphogenesis;axon guidance;axonogenesis;biological regulation;cation homeostasis;cell cycle cytokinesis;cell cycle process;cell part morphogenesis;cell projection morphogenesis;cell projection organization;cellular chemical homeostasis;cellular component assembly;cellular component assembly at cellular level;cellular component morphogenesis;cellular component organization;ce…	binding;ion channel binding;protein binding;structural constituent of cytoskeleton;structural molecule activity	axon;axon part;basal plasma membrane;basolateral plasma membrane;cell junction;cell part;cell projection;cell projection part;cell-cell contact zone;cell-cell junction;contractile fiber part;cytoplasmic part;cytoskeleton;dendrite;endoplasmic reticulum;initial segment;intercalated disc;intracellular membrane-bounded organelle;intracellular non-membrane-bounded organelle;intracellular organelle;int…		Ank_2;Death;ZU5	AAANWWTGC_UNKNOWN;AACTTT_UNKNOWN;AAGCCAT,MIR-135A,MIR-135B;ACACTAC,MIR-142-3P;BERENJENO_TRANSFORMED_BY_RHOA_DN;BHAT_ESR1_TARGETS_NOT_VIA_AKT1_DN;BLALOCK_ALZHEIMERS_DISEASE_DN;BREDEMEYER_RAG_SIGNALING_VIA_ATM_NOT_VIA_NFKB_DN;BRUINS_UVC_RESPONSE_VIA_TP53_GROUP_A;BURTON_ADIPOGENESIS_2;CAGCAGG,MIR-370;CAGGTG_V$E12_Q6;CAGTATT,MIR-200B,MIR-200C,MIR-429;CATRRAGC_UNKNOWN;CATTGTYY_V$SOX9_B1;CHARAFE_BREAST…		0.000146177	0.000169492	33	22.6364	22.4673	22.8903	21.159	22.5874	22.5689	22.1438	22.1647	4	4	4	4	4.04663	0.00321037	5.20346
G5E8P1	Brd1	BRD1_MOUSE	Bromodomain-containing protein 1	19.3514	19.0771	18.8688	18.8802	19.0094	19.2311	19.0979	18.9668	19.059	19.029	18.8934	19.3972	19.0801	19.5366	19.5376	16.1942						cellular component organization;cellular component organization at cellular level;cellular component organization or biogenesis;cellular component organization or biogenesis at cellular level;cellular macromolecule metabolic process;cellular metabolic process;cellular process;cellular protein metabolic process;chromatin modification;chromatin organization;chromosome organization;covalent chromati…	binding;cation binding;histone binding;ion binding;metal ion binding;protein binding;transition metal ion binding;zinc ion binding	cell part;H3 histone acetyltransferase complex;histone acetyltransferase complex;intracellular membrane-bounded organelle;intracellular organelle;intracellular organelle part;intracellular part;macromolecular complex;membrane-bounded organelle;MOZ/MORF histone acetyltransferase complex;nuclear part;nucleoplasm;nucleoplasm part;nucleus;organelle;organelle part;protein complex		Bromodomain;EPL1;PWWP	AGCATTA,MIR-155;ATAAGCT,MIR-21;ATATGCA,MIR-448;BLALOCK_ALZHEIMERS_DISEASE_INCIPIENT_UP;BLALOCK_ALZHEIMERS_DISEASE_UP;BROWNE_HCMV_INFECTION_6HR_DN;BUYTAERT_PHOTODYNAMIC_THERAPY_STRESS_UP;CACTTTG,MIR-520G,MIR-520H;CHENG_IMPRINTED_BY_ESTRADIOL;chr22q13;DAZARD_RESPONSE_TO_UV_SCC_DN;DIAZ_CHRONIC_MEYLOGENOUS_LEUKEMIA_UP;GGCACAT,MIR-455;GINESTIER_BREAST_CANCER_ZNF217_AMPLIFIED_DN;GSE2706_UNSTIM_VS_2H_LP…		0.000146177	0.000169492	8	19.0482	18.9787	NaN	NaN	19.0443	19.0763	19.0947	19.3847	4	4	4	3	0.102547	0.556582	0.120714
J3QNX5	Shisa8	SHSA8_MOUSE	Protein shisa-8	18.7403	18.6133	18.4577	18.6967	18.8817	19.2505	19.0751	19.3505	18.223	18.9277	18.6237	18.894	19.0175	18.7238	18.3757	17.3527	+									Shisa	BILD_E2F3_ONCOGENIC_SIGNATURE;chr22q13;DODD_NASOPHARYNGEAL_CARCINOMA_UP;E2F3_UP.V1_UP;FOSTER_KDM1A_TARGETS_DN;GSE12366_NAIVE_VS_MEMORY_BCELL_DN;JIANG_VHL_TARGETS;PEREZ_TP53_TARGETS		0.000146177	0.000169492	3	18.5339	18.1098	NaN	17.6931	18.627	19.1395	18.6671	18.3674	4	4	4	4	0.923725	0.042937	0.0831224
O08528	Hk2	HXK2_MOUSE	Hexokinase-2	17.2738	18.2182	17.9048	18.0271	18.2121	17.0522	18.2431	17.0574	17.9346	18.4205	18.4881	18.366	18.3321	18.2474	17.9609	16.1942						alcohol catabolic process;alcohol metabolic process;apoptotic mitochondrial changes;biological regulation;body fluid secretion;carbohydrate catabolic process;carbohydrate homeostasis;carbohydrate metabolic process;carbohydrate phosphorylation;catabolic process;cellular carbohydrate catabolic process;cellular carbohydrate metabolic process;cellular chemical homeostasis;cellular component organizat…	adenyl nucleotide binding;adenyl ribonucleotide binding;ATP binding;binding;carbohydrate binding;carbohydrate kinase activity;catalytic activity;fructokinase activity;glucokinase activity;glucose binding;hexokinase activity;kinase activity;mannokinase activity;monosaccharide binding;nucleotide binding;phosphotransferase activity, alcohol group as acceptor;purine nucleotide binding;purine ribonucl…	cell part;cytoplasmic part;cytosol;intracellular membrane-bounded organelle;intracellular organelle;intracellular organelle part;intracellular part;membrane;membrane-bounded organelle;mitochondrial membrane;mitochondrial outer membrane;mitochondrial part;mitochondrion;organelle;organelle membrane;organelle outer membrane;organelle part;outer membrane	Amino sugar and nucleotide sugar metabolism;Butirosin and neomycin biosynthesis;Carbohydrate digestion and absorption;Fructose and mannose metabolism;Galactose metabolism;Glycolysis / Gluconeogenesis;Insulin signaling pathway;Starch and sucrose metabolism;Streptomycin biosynthesis;Type II diabetes mellitus	Hexokinase_1;Hexokinase_2	ABBUD_LIF_SIGNALING_1_DN;ACEVEDO_FGFR1_TARGETS_IN_PROSTATE_CANCER_MODEL_UP;AMUNDSON_GENOTOXIC_SIGNATURE;ATACCTC,MIR-202;BASAKI_YBX1_TARGETS_DN;BERENJENO_TRANSFORMED_BY_RHOA_UP;BHAT_ESR1_TARGETS_NOT_VIA_AKT1_UP;BHAT_ESR1_TARGETS_VIA_AKT1_UP;BILD_HRAS_ONCOGENIC_SIGNATURE;BILD_MYC_ONCOGENIC_SIGNATURE;BRUNO_HEMATOPOIESIS;BURTON_ADIPOGENESIS_5;BURTON_ADIPOGENESIS_PEAK_AT_2HR;BUYTAERT_PHOTODYNAMIC_THER…	REACT_297294;REACT_314687	0.000146177	0.000169492	5	NaN	NaN	20.0867	18.3118	17.856	18.2276	18.3023	18.1801	4	2	4	3	0.311545	0.2452	0.95095
O08529	Capn2	CAN2_MOUSE	Calpain-2 catalytic subunit	23.7794	23.8617	23.8184	23.8287	23.8535	23.8768	23.9421	23.9416	23.4276	23.5211	23.451	23.5008	23.506	23.6921	23.4736	23.406	+	+				anatomical structure development;anatomical structure formation involved in morphogenesis;biological regulation;blastocyst development;cellular process;cellular response to acid;cellular response to amine stimulus;cellular response to amino acid stimulus;cellular response to chemical stimulus;cellular response to endogenous stimulus;cellular response to organic nitrogen;cellular response to organ…	binding;calcium ion binding;calcium-dependent cysteine-type endopeptidase activity;catalytic activity;cation binding;cysteine-type endopeptidase activity;cysteine-type peptidase activity;endopeptidase activity;hydrolase activity;ion binding;metal ion binding;peptidase activity;peptidase activity, acting on L-amino acid peptides	adherens junction;anchoring junction;cell junction;cell part;cell projection;cell-substrate adherens junction;cell-substrate junction;chromatin;chromosomal part;cytoplasm;cytoplasmic part;cytosol;dendrite;endoplasmic reticulum;endoplasmic reticulum part;extracellular membrane-bounded organelle;extracellular organelle;extracellular region part;extracellular vesicular exosome;focal adhesion;Golgi a…	Alzheimer's disease;Apoptosis;Focal adhesion;Protein processing in endoplasmic reticulum	Calpain_III;Peptidase_C2	BAELDE_DIABETIC_NEPHROPATHY_DN;BERTUCCI_MEDULLARY_VS_DUCTAL_BREAST_CANCER_DN;BIOCARTA_MCALPAIN_PATHWAY;BIOCARTA_MEF2D_PATHWAY;BYSTRYKH_HEMATOPOIESIS_STEM_CELL_QTL_TRANS;CAIRO_HEPATOBLASTOMA_CLASSES_DN;CHEN_METABOLIC_SYNDROM_NETWORK;chr1q41;CREIGHTON_ENDOCRINE_THERAPY_RESISTANCE_3;DARWICHE_PAPILLOMA_RISK_HIGH_DN;DARWICHE_PAPILLOMA_RISK_LOW_UP;DARWICHE_SKIN_TUMOR_PROMOTER_UP;DARWICHE_SQUAMOUS_CELL_…		0.000146177	0.000169492	26	23.3955	23.6547	23.6278	23.6335	23.822	23.9035	23.4751	23.5194	4	4	4	4	5.59479	0.00274349	4.82001
O08530	S1pr1	S1PR1_MOUSE	Sphingosine 1-phosphate receptor 1	23.7665	23.7219	22.8701	23.4833	23.016	23.029	23.525	22.6779	16.6434	23.5012	23.3996	23.2474	23.0891	23.0143	22.6078	22.146						actin cytoskeleton organization;actin cytoskeleton reorganization;actin filament-based process;anatomical structure development;anatomical structure formation involved in morphogenesis;anatomical structure maturation;anatomical structure morphogenesis;angiogenesis;biological regulation;blood vessel maturation;brain development;calcium ion homeostasis;cAMP-mediated signaling;cardiac muscle tissue …	binding;G-protein-coupled receptor binding;lipid binding;protein binding;receptor binding;sphingolipid binding	caveola;cell part;cytoplasmic part;endosome;external side of plasma membrane;integral to membrane;intracellular membrane-bounded organelle;intracellular organelle;intracellular part;intrinsic to membrane;intrinsic to plasma membrane;membrane part;membrane raft;membrane-bounded organelle;organelle;plasma membrane part	Neuroactive ligand-receptor interaction	7tm_1	ACEVEDO_LIVER_CANCER_UP;ACEVEDO_LIVER_TUMOR_VS_NORMAL_ADJACENT_TISSUE_UP;AGCATTA,MIR-155;ARGGGTTAA_UNKNOWN;BIOCARTA_EDG1_PATHWAY;BLALOCK_ALZHEIMERS_DISEASE_DN;BOQUEST_STEM_CELL_DN;BROWNE_HCMV_INFECTION_1HR_DN;BROWNE_HCMV_INFECTION_6HR_DN;CAGGTA_V$AREB6_01;CAGGTG_V$E12_Q6;CELL_SURFACE_RECEPTOR_LINKED_SIGNAL_TRANSDUCTION_GO_0007166;chr1p21;CSR_LATE_UP.V1_UP;CTAWWWATA_V$RSRFC4_Q2;CTGAGCC,MIR-24;DAVI…	REACT_317886;REACT_331048	0.000146177	0.000169492	4	23.1769	22.4394	NaN	NaN	23.4604	23.062	23.3828	22.7143	4	4	3	4	0.273343	0.214316	0.469364
O08532	Cacna2d1	CA2D1_MOUSE	Voltage-dependent calcium channel subunit alpha-2/delta-1	22.0546	22.43	22.4401	22.3077	22.8606	22.3856	22.268	22.3957	21.9635	22.4867	22.3653	22.7442	22.6655	22.7971	22.7101	23.5885	+					biological regulation;calcium ion transmembrane transport;calcium ion transport;cation transport;cellular process;divalent inorganic cation transport;divalent metal ion transport;establishment of localization;ion transmembrane transport;ion transport;metal ion transport;regulation of biological process;regulation of calcium ion transport;regulation of ion transport;regulation of localization;regu…	binding;calcium channel activity;calcium channel regulator activity;cation binding;cation channel activity;cation transmembrane transporter activity;channel activity;channel regulator activity;gated channel activity;ion binding;ion channel activity;ion transmembrane transporter activity;metal ion binding;passive transmembrane transporter activity;substrate-specific channel activity;substrate-spec…	calcium channel complex;cation channel complex;cell part;cytoplasmic part;endoplasmic reticulum;extracellular membrane-bounded organelle;extracellular organelle;extracellular region part;extracellular vesicular exosome;intracellular membrane-bounded organelle;intracellular organelle;intracellular part;ion channel complex;macromolecular complex;membrane part;membrane-bounded organelle;membrane-bou…	Arrhythmogenic right ventricular cardiomyopathy (ARVC);Cardiac muscle contraction;Dilated cardiomyopathy;Hypertrophic cardiomyopathy (HCM);MAPK signaling pathway	Cache_1;VGCC_alpha2;VWA;VWA_N	ACEVEDO_FGFR1_TARGETS_IN_PROSTATE_CANCER_MODEL_DN;ATGCTGC,MIR-103,MIR-107;BENPORATH_NANOG_TARGETS;BENPORATH_NOS_TARGETS;BENPORATH_OCT4_TARGETS;BENPORATH_SOX2_TARGETS;CALCIUM_CHANNEL_ACTIVITY;CALCIUM_ION_TRANSPORT;CATION_CHANNEL_ACTIVITY;CATION_TRANSMEMBRANE_TRANSPORTER_ACTIVITY;CATION_TRANSPORT;CHANDRAN_METASTASIS_DN;chr7q21;CTTTGT_V$LEF1_Q2;DELASERNA_MYOD_TARGETS_UP;DI___TRI_VALENT_INORGANIC_CAT…		0.000146177	0.000169492	19	21.7243	22.0042	25.8528	21.4298	22.3081	22.4775	22.3899	22.9403	4	4	4	4	1.2157	0.029204	0.17068
Q99PI8	Rtn4r	RTN4R_MOUSE	Reticulon-4 receptor	20.2115	16.8303	19.7109	20.2216	19.8512	20.2842	19.8792	20.3297	20.5534	20.5242	20.399	19.9919	20.112	20.1402	19.4693	19.5493						anatomical structure morphogenesis;axonogenesis;cell part morphogenesis;cell projection morphogenesis;cell projection organization;cellular component morphogenesis;cellular component organization;cellular component organization at cellular level;cellular component organization or biogenesis;cellular component organization or biogenesis at cellular level;cellular developmental process;cellular pro…		anchored to membrane;cell part;cell projection part;cell surface;cytoplasmic part;endoplasmic reticulum;extracellular membrane-bounded organelle;extracellular organelle;extracellular region part;extracellular vesicular exosome;growth cone;intracellular membrane-bounded organelle;intracellular organelle;intracellular part;intrinsic to membrane;membrane;membrane part;membrane-bounded organelle;memb…		LRR_8	BILD_E2F3_ONCOGENIC_SIGNATURE;CACGTG_V$MYC_Q2;chr22q11;CTTTGT_V$LEF1_Q2;CYTOPLASM;CYTOPLASMIC_PART;DARWICHE_PAPILLOMA_RISK_HIGH_DN;DARWICHE_PAPILLOMA_RISK_LOW_DN;DARWICHE_SKIN_TUMOR_PROMOTER_DN;DARWICHE_SQUAMOUS_CELL_CARCINOMA_DN;E2F3_UP.V1_UP;ENDOPLASMIC_RETICULUM;FOSTER_TOLERANT_MACROPHAGE_UP;GGGYGTGNY_UNKNOWN;GSE10239_MEMORY_VS_KLRG1HIGH_EFF_CD8_TCELL_UP;GSE14308_NAIVE_CD4_TCELL_VS_NATURAL_TRE…	REACT_336835	0.000249906	0.000169492	3	19.9924	20.1107	NaN	18.614	20.048	20.0861	20.3671	19.8177	3	4	4	4	0.480597	0.103423	0.654827
O08547	Sec22b	SC22B_MOUSE	Vesicle-trafficking protein SEC22b	23.5191	23.5924	23.6441	23.6621	23.5965	23.3906	23.6615	23.5641	23.5237	23.6446	23.806	23.4415	23.5069	23.4305	23.2432	23.1842						biological regulation;cellular component organization;cellular component organization at cellular level;cellular component organization or biogenesis;cellular component organization or biogenesis at cellular level;cellular membrane fusion;cellular membrane organization;cellular process;ER to Golgi vesicle-mediated transport;establishment of localization;establishment of localization in cell;estab…	binding;protein binding;SNAP receptor activity;SNARE binding	cell part;cytoplasmic membrane-bounded vesicle;cytoplasmic part;cytoplasmic vesicle;endoplasmic reticulum membrane;endoplasmic reticulum part;endoplasmic reticulum-Golgi intermediate compartment;endoplasmic reticulum-Golgi intermediate compartment membrane;Golgi apparatus part;Golgi membrane;integral to membrane;intracellular membrane-bounded organelle;intracellular organelle;intracellular organe…	Phagosome;SNARE interactions in vesicular transport	Longin;Synaptobrevin	ACATTCC,MIR-1,MIR-206;BENPORATH_NANOG_TARGETS;BERENJENO_TRANSFORMED_BY_RHOA_DN;CELLULAR_LOCALIZATION;CHEOK_RESPONSE_TO_HD_MTX_DN;chr1q21;CREIGHTON_ENDOCRINE_THERAPY_RESISTANCE_5;ER_TO_GOLGI_VESICLE_MEDIATED_TRANSPORT;ESTABLISHMENT_OF_CELLULAR_LOCALIZATION;ESTABLISHMENT_OF_LOCALIZATION;FLECHNER_BIOPSY_KIDNEY_TRANSPLANT_OK_VS_DONOR_UP;GINESTIER_BREAST_CANCER_ZNF217_AMPLIFIED_UP;GOLGI_VESICLE_TRANSP…		0.000146177	0.000169492	10	23.4033	23.8304	23.8585	21.5	23.6044	23.5532	23.6039	23.3412	4	4	4	4	1.40472	0.0885937	0.00198393
O08553	Dpysl2	DPYL2_MOUSE	Dihydropyrimidinase-related protein 2	28.5908	28.6948	28.8838	28.5332	28.6773	28.6303	28.4725	28.6561	28.3845	28.2828	28.2796	28.3322	28.3614	28.4089	28.298	28.67	+					anatomical structure development;axon guidance;biological regulation;cellular component organization;cellular component organization at cellular level;cellular component organization or biogenesis;cellular component organization or biogenesis at cellular level;cellular membrane organization;cellular process;chemotaxis;cytoskeleton organization;developmental process;endocytosis;establishment of lo…	binding;catalytic activity;enzyme binding;hydrolase activity;hydrolase activity, acting on carbon-nitrogen (but not peptide) bonds;kinase binding;protein binding;protein kinase binding	axon;axon part;cell body;cell part;cell projection;cell projection part;cytoplasmic part;cytoskeletal part;cytosol;dendrite;extracellular membrane-bounded organelle;extracellular organelle;extracellular region part;extracellular vesicular exosome;growth cone;intracellular membrane-bounded organelle;intracellular organelle;intracellular organelle part;intracellular part;macromolecular complex;memb…	Axon guidance	Amidohydro_1	AACTGGA,MIR-145;ANATOMICAL_STRUCTURE_DEVELOPMENT;BENPORATH_NANOG_TARGETS;BENPORATH_NOS_TARGETS;BENPORATH_OCT4_TARGETS;BENPORATH_SOX2_TARGETS;CCTGTGA,MIR-513;CHANG_CORE_SERUM_RESPONSE_DN;chr8p22;CTGCAGY_UNKNOWN;CTTTAAR_UNKNOWN;CTTTGT_V$LEF1_Q2;CUI_TCF21_TARGETS_2_DN;DEBIASI_APOPTOSIS_BY_REOVIRUS_INFECTION_DN;DELASERNA_MYOD_TARGETS_DN;DODD_NASOPHARYNGEAL_CARCINOMA_DN;ELVIDGE_HIF1A_AND_HIF2A_TARGETS…	REACT_314392;REACT_353475	0.000146177	0.000169492	28	28.7021	28.634	27.7113	28.6293	28.6757	28.6091	28.3198	28.4346	4	4	4	4	2.21756	0.0254504	2.33988
Q99KG3	Rbm10	RBM10_MOUSE	RNA-binding protein 10	21.4811	20.9836	20.8698	21.2768	21.1375	21.2525	21.2693	21.296	21.5934	21.6311	21.6331	21.656	21.5332	21.3311	21.3169	20.8224	+	+				3'-UTR-mediated mRNA stabilization;biological regulation;cellular macromolecule metabolic process;cellular metabolic process;cellular nitrogen compound metabolic process;cellular process;macromolecule metabolic process;metabolic process;mRNA metabolic process;mRNA stabilization;negative regulation of biological process;negative regulation of biosynthetic process;negative regulation of cell prolif…	binding;cation binding;identical protein binding;ion binding;metal ion binding;nucleotide binding;protein binding;protein complex binding;transition metal ion binding;zinc ion binding	cell part;intracellular membrane-bounded organelle;intracellular organelle;intracellular organelle part;intracellular part;membrane-bounded organelle;nuclear part;nucleoplasm;nucleus;organelle;organelle part		G-patch;zf-RanBP	BLALOCK_ALZHEIMERS_DISEASE_UP;BROWNE_HCMV_INFECTION_14HR_DN;BROWNE_HCMV_INFECTION_4HR_DN;CCCNNGGGAR_V$OLF1_01;chrxp11;GATTGGY_V$NFY_Q6_01;GAUSSMANN_MLL_AF4_FUSION_TARGETS_C_UP;GCCATNTTG_V$YY1_Q6;GGGCGGR_V$SP1_Q6;GINESTIER_BREAST_CANCER_ZNF217_AMPLIFIED_DN;GNF2_FBL;GNF2_HDAC1;GOBERT_OLIGODENDROCYTE_DIFFERENTIATION_UP;GRAESSMANN_APOPTOSIS_BY_DOXORUBICIN_DN;GRAESSMANN_RESPONSE_TO_MC_AND_DOXORUBICIN_…		0.000146177	0.000169492	15	21.4435	21.175	NaN	21.917	21.1528	21.2388	21.6284	21.2509	4	4	4	4	1.49566	0.0302927	1.84202
O08579	Emd	EMD_MOUSE	Emerin	22.085	21.7587	21.3357	21.8336	21.9025	22.0835	21.9251	21.9063	22.2058	21.9762	22.0184	21.7761	21.9159	21.805	21.7692	21.0998						biological regulation;cell differentiation;cellular developmental process;cellular process;cellular response to chemical stimulus;cellular response to growth factor stimulus;cellular response to organic substance;cellular response to stimulus;developmental process;muscle cell differentiation;negative regulation of biological process;negative regulation of catenin import into nucleus;negative regu…	actin binding;beta-tubulin binding;binding;cytoskeletal protein binding;protein binding;tubulin binding	cell part;cytoplasmic part;cytoskeletal part;endoplasmic reticulum;envelope;integral to membrane;intracellular membrane-bounded organelle;intracellular organelle;intracellular organelle part;intracellular part;intrinsic to membrane;macromolecular complex;membrane;membrane part;membrane-bounded organelle;microtubule;nuclear envelope;nuclear inner membrane;nuclear lamina;nuclear membrane;nuclear ou…	Arrhythmogenic right ventricular cardiomyopathy (ARVC);Dilated cardiomyopathy;Hypertrophic cardiomyopathy (HCM)	LEM	ANATOMICAL_STRUCTURE_DEVELOPMENT;BURTON_ADIPOGENESIS_PEAK_AT_2HR;chrxq27;COULOUARN_TEMPORAL_TGFB1_SIGNATURE_UP;DAIRKEE_TERT_TARGETS_UP;ENDOMEMBRANE_SYSTEM;ENK_UV_RESPONSE_KERATINOCYTE_UP;ENVELOPE;GCM_CSNK2B;GSE11864_CSF1_IFNG_VS_CSF1_PAM3CYS_IN_MAC_DN;GSE11864_UNTREATED_VS_CSF1_PAM3CYS_IN_MAC_DN;GSE12845_IGD_POS_BLOOD_VS_DARKZONE_GC_TONSIL_BCELL_UP;GSE14308_TH1_VS_NATURAL_TREG_UP;GSE1460_DP_THYMO…	REACT_320608;REACT_333139;REACT_352955	0.000146177	0.000169492	9	21.7455	21.6992	23.8521	19.7342	21.7533	21.9544	21.9941	21.6475	4	4	4	4	0.6143	0.172767	0.64412
O08581	Kcnk1	KCNK1_MOUSE	Potassium channel subfamily K member 1	21.0592	20.7713	20.7704	20.9481	20.2905	20.4584	21.0195	20.4947	20.8848	21.1547	21.0136	21.2366	21.083	21.0131	20.9689	19.0687						biological regulation;cation transport;cellular chemical homeostasis;cellular homeostasis;cellular ion homeostasis;cellular potassium ion transport;cellular process;chemical homeostasis;establishment of localization;homeostatic process;ion homeostasis;ion transmembrane transport;ion transport;metal ion transport;monovalent inorganic cation transport;potassium ion transmembrane transport;potassium…	cation channel activity;cation transmembrane transporter activity;channel activity;gated channel activity;inorganic cation transmembrane transporter activity;inward rectifier potassium channel activity;ion channel activity;ion transmembrane transporter activity;leak channel activity;ligand-gated channel activity;ligand-gated ion channel activity;metal ion transmembrane transporter activity;monova…	apical plasma membrane;brush border membrane;cation channel complex;cell part;cell projection membrane;cell projection part;cytoplasmic part;endosome;integral to membrane;integral to plasma membrane;intracellular membrane-bounded organelle;intracellular organelle;intracellular part;intrinsic to membrane;intrinsic to plasma membrane;ion channel complex;macromolecular complex;membrane part;membrane…		Ion_trans_2	BAE_BRCA1_TARGETS_UP;BILD_HRAS_ONCOGENIC_SIGNATURE;BLALOCK_ALZHEIMERS_DISEASE_DN;BOQUEST_STEM_CELL_UP;BROWNE_HCMV_INFECTION_16HR_UP;BUYTAERT_PHOTODYNAMIC_THERAPY_STRESS_UP;CAGGTA_V$AREB6_01;CAGGTG_V$E12_Q6;CAIRO_HEPATOBLASTOMA_CLASSES_DN;CATION_CHANNEL_ACTIVITY;CATION_TRANSMEMBRANE_TRANSPORTER_ACTIVITY;CATION_TRANSPORT;CHARAFE_BREAST_CANCER_BASAL_VS_MESENCHYMAL_UP;CHEN_LVAD_SUPPORT_OF_FAILING_HEA…	REACT_320130	0.000146177	0.000169492	4	20.4109	20.2024	NaN	NaN	20.8873	20.5658	21.0724	20.5334	4	4	4	4	0.36348	0.222353	0.890093
O08582	Gtpbp1	GTPB1_MOUSE	GTP-binding protein 1	21.0729	20.9296	21.0337	20.8656	20.9401	20.9831	20.9402	20.8929	20.7914	21.0913	21.0573	20.9467	21.1287	21.171	21.0364	19.883						biological regulation;metabolic process;positive regulation of biological process;positive regulation of catabolic process;positive regulation of cellular catabolic process;positive regulation of cellular metabolic process;positive regulation of cellular process;positive regulation of macromolecule metabolic process;positive regulation of metabolic process;positive regulation of mRNA catabolic pr…	binding;catalytic activity;GTP binding;GTPase activity;guanyl nucleotide binding;guanyl ribonucleotide binding;hydrolase activity;hydrolase activity, acting on acid anhydrides;hydrolase activity, acting on acid anhydrides, in phosphorus-containing anhydrides;nucleoside-triphosphatase activity;nucleotide binding;purine nucleotide binding;purine ribonucleoside triphosphate binding;purine ribonucleo…	cell part;cytoplasmic exosome (RNase complex);cytoplasmic part;cytosol;exosome (RNase complex);intracellular part;macromolecular complex;membrane;protein complex		GTP_EFTU;GTP_EFTU_D2;GTP_EFTU_D3	ACEVEDO_METHYLATED_IN_LIVER_CANCER_DN;AGUIRRE_PANCREATIC_CANCER_COPY_NUMBER_DN;AMUNDSON_GAMMA_RADIATION_RESPONSE;AMUNDSON_GENOTOXIC_SIGNATURE;BENPORATH_NANOG_TARGETS;BENPORATH_OCT4_TARGETS;BLALOCK_ALZHEIMERS_DISEASE_UP;BYSTRYKH_HEMATOPOIESIS_STEM_CELL_QTL_TRANS;CACGTG_V$MYC_Q2;chr22q13;CTGCAGY_UNKNOWN;DORSAM_HOXA9_TARGETS_UP;GACAATC,MIR-219;GARY_CD5_TARGETS_UP;GATTGGY_V$NFY_Q6_01;GCM_BCL2L1;GCM_D…		0.000146177	0.000169492	9	20.9565	20.5482	NaN	19.8073	20.9754	20.9391	20.9717	20.8048	4	4	4	4	0.0663506	0.766787	0.0153861
O08583	Alyref	THOC4_MOUSE	THO complex subunit 4	22.1425	22.2225	22.8446	22.6144	22.7488	22.9152	22.8423	22.8886	22.8935	23.1488	23.0354	23.1481	23.1306	22.8638	22.7679	22.1606	+	+				cellular macromolecule metabolic process;cellular metabolic process;cellular nitrogen compound metabolic process;cellular process;establishment of localization;establishment of RNA localization;macromolecule metabolic process;metabolic process;mRNA metabolic process;mRNA processing;mRNA transport;nitrogen compound metabolic process;nucleic acid metabolic process;nucleic acid transport;nucleobase-…	binding;DNA binding;nucleic acid binding;nucleotide binding;RNA binding;single-stranded DNA binding;structure-specific DNA binding	cell part;cytoplasm;intracellular membrane-bounded organelle;intracellular organelle;intracellular organelle part;intracellular part;macromolecular complex;membrane-bounded organelle;nuclear body;nuclear part;nuclear speck;nucleoplasm part;nucleus;organelle;organelle part;ribonucleoprotein complex;spliceosomal complex	mRNA surveillance pathway;RNA transport;Spliceosome	FoP_duplication;RRM_1		REACT_291263;REACT_307866;REACT_321120;REACT_328741;REACT_347720;REACT_351784;REACT_353355	0.000146177	0.000169492	7	22.4687	22.8054	24.0404	22.5253	22.456	22.8487	23.0564	22.7307	4	4	4	4	1.26355	0.0319423	1.84221
O08585	Clta	CLCA_MOUSE	Clathrin light chain A	25.2269	25.2905	25.3355	25.0526	25.2287	25.1065	25.0275	25.2134	23.9197	24.1928	24.0454	24.6964	24.5287	24.89	24.4441	24.939	+	+				cellular component organization;cellular component organization or biogenesis;cellular membrane organization;cellular process;clathrin-mediated endocytosis;endocytosis;establishment of localization;establishment of localization in cell;establishment of protein localization;intracellular protein transport;intracellular transport;membrane invagination;membrane organization;protein transport;recepto…	binding;clathrin binding;clathrin heavy chain binding;protein binding;structural molecule activity	cell part;clathrin coat;clathrin coat of coated pit;clathrin coat of trans-Golgi network vesicle;clathrin complex;clathrin vesicle coat;cytoplasmic membrane-bounded vesicle;cytoplasmic part;cytoplasmic vesicle;cytoplasmic vesicle part;Golgi apparatus part;intracellular membrane-bounded organelle;intracellular organelle;intracellular organelle part;intracellular part;macromolecular complex;membran…		Clathrin_lg_ch	AACTTT_UNKNOWN;ACACTAC,MIR-142-3P;AGUIRRE_PANCREATIC_CANCER_COPY_NUMBER_UP;ATGTTTC,MIR-494;BERENJENO_TRANSFORMED_BY_RHOA_DN;BONOME_OVARIAN_CANCER_SURVIVAL_OPTIMAL_DEBULKING;CHNG_MULTIPLE_MYELOMA_HYPERPLOID_UP;chr12q23;CHUNG_BLISTER_CYTOTOXICITY_UP;ENK_UV_RESPONSE_KERATINOCYTE_UP;GATTGGY_V$NFY_Q6_01;GREGORY_SYNTHETIC_LETHAL_WITH_IMATINIB;GSE11057_NAIVE_CD4_VS_PBMC_CD4_TCELL_DN;GSE12845_IGD_POS_BLO…		0.000146177	0.000169492	7	25.1586	24.5703	20.5998	24.6734	25.2264	25.144	24.2136	24.7005	4	4	4	4	3.90723	0.00139249	2.85434
O08586	Pten	PTEN_MOUSE	Phosphatidylinositol 3,4,5-trisphosphate 3-phosphatase and dual-specificity protein phosphatase PTEN	21.4684	21.2524	20.9572	20.7162	21.0218	20.5856	20.8619	20.7944	20.6461	20.6961	20.9511	20.838	20.7545	20.6453	20.7809	20.7414						activation of anaphase-promoting complex activity;activation of mitotic anaphase-promoting complex activity;adult behavior;aging;anatomical structure development;anatomical structure formation involved in morphogenesis;anatomical structure morphogenesis;angiogenesis;apoptosis;axonogenesis;behavior;behavioral interaction between organisms;biological regulation;brain morphogenesis;canonical Wnt rec…	anaphase-promoting complex binding;binding;catalytic activity;cation binding;enzyme binding;hydrolase activity;hydrolase activity, acting on ester bonds;inositol or phosphatidylinositol phosphatase activity;inositol phosphate phosphatase activity;inositol tetrakisphosphate phosphatase activity;inositol-1,3,4,5-tetrakisphosphate 3-phosphatase activity;ion binding;kinase binding;lipid phosphatase a…	cell part;cell projection;cell projection part;cytoplasm;cytoplasmic part;dendritic spine;internal side of plasma membrane;intracellular membrane-bounded organelle;intracellular organelle;intracellular organelle part;intracellular part;membrane;membrane part;membrane-bounded organelle;mitochondrion;myelin sheath adaxonal region;neuron projection;neuron spine;nuclear body;nuclear part;nucleoplasm;…	Endometrial cancer;Focal adhesion;Glioma;Inositol phosphate metabolism;Melanoma;p53 signaling pathway;Pathways in cancer;Phosphatidylinositol signaling system;Prostate cancer;Small cell lung cancer;Tight junction	DSPc;PTEN_C2	AACTTT_UNKNOWN;AAGGGAT,MIR-188;ABRAHAM_ALPC_VS_MULTIPLE_MYELOMA_DN;ACCAATC,MIR-509;ACEVEDO_LIVER_CANCER_WITH_H3K27ME3_UP;ACTGAAA,MIR-30A-3P,MIR-30E-3P;ALCOHOL_METABOLIC_PROCESS;ANATOMICAL_STRUCTURE_DEVELOPMENT;APOPTOSIS_GO;ATAGGAA,MIR-202;BENPORATH_MYC_TARGETS_WITH_EBOX;BERENJENO_TRANSFORMED_BY_RHOA_DN;BIOCARTA_CTCF_PATHWAY;BIOCARTA_EIF4_PATHWAY;BIOCARTA_IGF1MTOR_PATHWAY;BIOCARTA_MET_PATHWAY;BIOC…	REACT_272541;REACT_280649;REACT_284913;REACT_321652	0.000146177	0.000169492	11	20.6509	20.7281	22.7657	20.9497	21.0985	20.8159	20.7828	20.7305	4	4	4	4	1.01514	0.0854997	0.892494
O08599	Stxbp1	STXB1_MOUSE	Syntaxin-binding protein 1	28.4159	28.5219	28.5581	28.4087	28.5193	28.4541	28.6241	28.5506	27.4817	27.85	27.8189	27.9273	28.0266	28.3296	27.867	28.0028	+	+	+			axon target recognition;biological adhesion;biological regulation;cell adhesion;cell communication;cell-cell adhesion;cell-cell signaling;cellular component organization;cellular component organization at cellular level;cellular component organization or biogenesis;cellular component organization or biogenesis at cellular level;cellular localization;cellular macromolecule localization;cellular me…	binding;protein binding;SNARE binding;syntaxin binding;syntaxin-1 binding	cell part;cytoplasm;cytoplasmic membrane-bounded vesicle;cytoplasmic part;cytoplasmic vesicle;cytosol;extracellular membrane-bounded organelle;extracellular organelle;extracellular region part;extracellular vesicular exosome;intracellular membrane-bounded organelle;intracellular organelle;intracellular organelle part;intracellular part;macromolecular complex;membrane;membrane-bounded organelle;me…		Sec1	AAGCACA,MIR-218;BILD_E2F3_ONCOGENIC_SIGNATURE;BLALOCK_ALZHEIMERS_DISEASE_DN;BOYLAN_MULTIPLE_MYELOMA_C_D_UP;CAGGTG_V$E12_Q6;CAGTGTT,MIR-141,MIR-200A;CAHOY_NEURONAL;CAMP_UP.V1_DN;CGTSACG_V$PAX3_B;CHEN_METABOLIC_SYNDROM_NETWORK;chr9q34;ENK_UV_RESPONSE_EPIDERMIS_DN;FEVR_CTNNB1_TARGETS_UP;FLECHNER_PBL_KIDNEY_TRANSPLANT_OK_VS_DONOR_UP;FRASOR_RESPONSE_TO_ESTRADIOL_DN;GGGCGGR_V$SP1_Q6;GNF2_DNM1;GNF2_MAPT…	REACT_281668;REACT_287745;REACT_306614;REACT_319523;REACT_325189	0.000146177	0.000169492	42	28.0822	27.9584	29.1269	27.1233	28.4761	28.537	27.7695	28.0565	4	4	4	4	4.63837	0.00145196	3.26936
O08600	Endog	NUCG_MOUSE	Endonuclease G, mitochondrial	22.2126	21.9669	21.8188	21.9421	21.5942	21.7066	21.8653	21.6855	21.9109	21.8515	21.6552	21.4333	21.7304	21.3889	20.7688	21.3165	+					biological regulation;catabolic process;cellular catabolic process;cellular macromolecule catabolic process;cellular macromolecule metabolic process;cellular metabolic process;cellular nitrogen compound metabolic process;cellular process;chordate embryonic development;developmental process;DNA catabolic process;DNA catabolic process, endonucleolytic;DNA fragmentation involved in apoptotic nuclear…	binding;catalytic activity;cation binding;endonuclease activity;hydrolase activity;hydrolase activity, acting on ester bonds;ion binding;metal ion binding;nuclease activity;nucleic acid binding	cell part;cytoplasmic part;intracellular membrane-bounded organelle;intracellular organelle;intracellular part;membrane-bounded organelle;mitochondrion;organelle	Apoptosis	Endonuclease_NS	ACEVEDO_LIVER_CANCER_DN;ACEVEDO_NORMAL_TISSUE_ADJACENT_TO_LIVER_TUMOR_DN;ATF2_S_UP.V1_UP;ATF2_UP.V1_UP;BIOCARTA_DNAFRAGMENT_PATHWAY;BIOCARTA_MITOCHONDRIA_PATHWAY;BUYTAERT_PHOTODYNAMIC_THERAPY_STRESS_DN;CAIRO_HEPATOBLASTOMA_DN;chr9q34;CREIGHTON_ENDOCRINE_THERAPY_RESISTANCE_2;DANG_BOUND_BY_MYC;DANG_MYC_TARGETS_UP;DAVICIONI_MOLECULAR_ARMS_VS_ERMS_UP;DOANE_RESPONSE_TO_ANDROGEN_UP;ENK_UV_RESPONSE_KERA…		0.000146177	0.000169492	7	22.4503	22.4032	NaN	21.9555	21.9851	21.7129	21.7127	21.3012	4	4	4	4	1.80356	0.0135485	1.03715
O08638	Myh11	MYH11_MOUSE	Myosin-11	21.3918	21.8392	21.4044	21.7362	21.982	22.0567	22.2902	22.1079	16.6434	21.1196	21.2739	20.9758	20.812	21.3805	20.8727	20.8518	+		+			actin cytoskeleton organization;actin filament-based process;anatomical structure development;anatomical structure formation involved in morphogenesis;cardiac muscle fiber development;cell development;cellular component assembly;cellular component assembly at cellular level;cellular component assembly involved in morphogenesis;cellular component organization;cellular component organization at cel…	adenyl nucleotide binding;adenyl ribonucleotide binding;ATP binding;binding;catalytic activity;hydrolase activity;hydrolase activity, acting on acid anhydrides;hydrolase activity, acting on acid anhydrides, in phosphorus-containing anhydrides;motor activity;nucleoside-triphosphatase activity;nucleotide binding;purine nucleotide binding;purine ribonucleoside triphosphate binding;purine ribonucleot…	actin filament bundle;actomyosin;brush border;cell part;cell projection;contractile fiber;contractile fiber part;cytoplasmic membrane-bounded vesicle;cytoplasmic part;cytoplasmic vesicle;cytoskeletal part;extracellular membrane-bounded organelle;extracellular organelle;extracellular region part;extracellular vesicular exosome;intracellular membrane-bounded organelle;intracellular non-membrane-bou…		Myosin_head;Myosin_N;Myosin_tail_1	ACEVEDO_FGFR1_TARGETS_IN_PROSTATE_CANCER_MODEL_DN;ACTIN_CYTOSKELETON_ORGANIZATION_AND_BIOGENESIS;ACTIN_FILAMENT_BASED_PROCESS;AFFAR_YY1_TARGETS_UP;ANATOMICAL_STRUCTURE_DEVELOPMENT;BOQUEST_STEM_CELL_UP;BROWNE_HCMV_INFECTION_48HR_DN;BRUINS_UVC_RESPONSE_LATE;CCAWWNAAGG_V$SRF_Q4;CELL_DEVELOPMENT;CELL_MATURATION;CELLULAR_COMPONENT_ASSEMBLY;chr16p13;CROMER_TUMORIGENESIS_DN;CYTOSKELETON_ORGANIZATION_AND…		0.000146177	0.000169492	23	20.9419	21.8324	23.0733	19.554	21.5929	22.1092	21.1231	20.9792	4	4	3	4	0.974533	0.0190555	0.681536
O08648	Map3k4	M3K4_MOUSE	Mitogen-activated protein kinase kinase kinase 4	16.7211	18.8006	16.8675	18.0333	18.6458	17.0522	16.7683	17.0574	18.7475	18.0949	18.5253	16.6663	18.5385	18.3507	19.3626	18.8951	+		+			activation of MAPK activity;activation of MAPKK activity;activation of protein kinase activity;anatomical structure development;biological regulation;cell differentiation;cellular developmental process;cellular macromolecule metabolic process;cellular metabolic process;cellular process;cellular protein metabolic process;cellular response to stimulus;chorionic trophoblast cell differentiation;dete…	adenyl nucleotide binding;adenyl ribonucleotide binding;ATP binding;binding;catalytic activity;cation binding;ion binding;kinase activity;MAP kinase kinase activity;MAP kinase kinase kinase activity;metal ion binding;molecular transducer activity;nucleotide binding;phosphotransferase activity, alcohol group as acceptor;protein kinase activity;protein serine/threonine kinase activity;protein serin…	cell part;cytoplasm;cytoplasmic part;intracellular part;perinuclear region of cytoplasm	GnRH signaling pathway;MAPK signaling pathway	Pkinase	AAANWWTGC_UNKNOWN;AACTTT_UNKNOWN;ACTIVATION_OF_PROTEIN_KINASE_ACTIVITY;BIOCARTA_MAPK_PATHWAY;BRUINS_UVC_RESPONSE_VIA_TP53_GROUP_A;CAGGTG_V$E12_Q6;CAIRO_HEPATOBLASTOMA_UP;CHANG_IMMORTALIZED_BY_HPV31_UP;chr6q25;CTACTGT,MIR-199A;CTGCAGY_UNKNOWN;DACOSTA_UV_RESPONSE_VIA_ERCC3_DN;GCCATNTTG_V$YY1_Q6;GNF2_KPNB1;GRAESSMANN_APOPTOSIS_BY_DOXORUBICIN_DN;GRAESSMANN_RESPONSE_TO_MC_AND_DOXORUBICIN_DN;GSE13493_D…		0.000146177	0.000169492	5	18.9496	NaN	NaN	NaN	18.417	18.6458	18.4559	18.7867	2	1	3	4	0.850214	0.0307572	0.239896
O08663	Metap2	MAP2_MOUSE	Methionine aminopeptidase 2	21.2179	20.9261	21.0631	20.9638	20.8576	21.0614	21.0166	21.012	21.23	21.4305	21.3564	21.297	21.1423	21.0347	21.2509	21.3289	+					cellular macromolecule metabolic process;cellular metabolic process;cellular process;cellular protein metabolic process;macromolecule metabolic process;macromolecule modification;metabolic process;N-terminal protein amino acid modification;peptidyl-amino acid modification;peptidyl-methionine modification;primary metabolic process;protein initiator methionine removal;protein maturation;protein met…	aminopeptidase activity;binding;catalytic activity;cation binding;exopeptidase activity;hydrolase activity;ion binding;metal ion binding;metalloaminopeptidase activity;metalloexopeptidase activity;metallopeptidase activity;peptidase activity;peptidase activity, acting on L-amino acid peptides	cell part;cytoplasm;intracellular part;membrane;plasma membrane		Peptidase_M24	AAAGACA,MIR-511;AMINOPEPTIDASE_ACTIVITY;BIOPOLYMER_METABOLIC_PROCESS;BIOPOLYMER_MODIFICATION;CELLULAR_MACROMOLECULE_METABOLIC_PROCESS;CELLULAR_PROTEIN_METABOLIC_PROCESS;chr12q22;CTAGGAA,MIR-384;CYTOPLASM;DIAZ_CHRONIC_MEYLOGENOUS_LEUKEMIA_UP;EXOPEPTIDASE_ACTIVITY;GARY_CD5_TARGETS_DN;GAUSSMANN_MLL_AF4_FUSION_TARGETS_G_UP;GNF2_CKS2;GNF2_FEN1;GNF2_HAT1;GNF2_RRM1;GNF2_SMC4L1;GSE10239_MEMORY_VS_DAY4.5_…	REACT_311545	0.000146177	0.000169492	13	21.0987	21.2571	22.9562	21.7876	21.0427	20.9869	21.3285	21.1892	4	4	4	4	2.41772	0.0249223	1.98003
Q8C0Y0	Ppp4r4	PP4R4_MOUSE	Serine/threonine-protein phosphatase 4 regulatory subunit 4	19.7497	19.9053	19.7101	19.9184	16.7711	19.0348	16.7683	19.1676	19.9959	19.8693	19.8616	19.9351	19.8134	19.582	19.5611	19.0333	+		+			biological regulation;negative regulation of catalytic activity;negative regulation of hydrolase activity;negative regulation of molecular function;negative regulation of phosphatase activity;negative regulation of phosphoprotein phosphatase activity;regulation of biological process;regulation of catalytic activity;regulation of cellular metabolic process;regulation of cellular process;regulation…	enzyme regulator activity;phosphatase regulator activity;protein phosphatase regulator activity	cell part;cytoplasm;intracellular part;macromolecular complex;protein complex;protein serine/threonine phosphatase complex			AATGTGA,MIR-23A,MIR-23B;chr14q32;GCANCTGNY_V$MYOD_Q6;GGGCGGR_V$SP1_Q6;GSE13411_NAIVE_VS_SWITCHED_MEMORY_BCELL_UP;GSE16522_ANTI_CD3CD28_STIM_VS_UNSTIM_NAIVE_CD8_TCELL_UP;GSE26928_EFF_MEMORY_VS_CXCR5_POS_CD4_TCELL_DN;GSE27786_CD4_TCELL_VS_NEUTROPHIL_UP;GSE27786_NKCELL_VS_NEUTROPHIL_DN;GSE36476_YOUNG_VS_OLD_DONOR_MEMORY_CD4_TCELL_72H_TSST_ACT_UP;GSE9037_WT_VS_IRAK4_KO_BMDM_DN;GTATGAT,MIR-154,MIR-487…		0.000146177	0.000169492	7	19.4138	19.2915	NaN	NaN	19.8209	19.1012	19.9155	19.4974	4	2	4	4	2.25373	0.00297122	0.752539
O08688	Capn5	CAN5_MOUSE	Calpain-5	20.1794	20.4632	20.0057	20.5944	20.605	20.5836	20.4915	20.4245	20.9526	21.0637	20.944	20.7833	20.9414	20.7837	20.7407	21.4048	+	+				macromolecule metabolic process;metabolic process;primary metabolic process;protein metabolic process;proteolysis	calcium-dependent cysteine-type endopeptidase activity;catalytic activity;cysteine-type endopeptidase activity;cysteine-type peptidase activity;endopeptidase activity;hydrolase activity;peptidase activity;peptidase activity, acting on L-amino acid peptides	adherens junction;anchoring junction;cell junction;cell part;cell surface;cell-substrate adherens junction;cell-substrate junction;cytoplasm;extracellular membrane-bounded organelle;extracellular organelle;extracellular region part;extracellular vesicular exosome;focal adhesion;intracellular part;membrane-bounded organelle;membrane-bounded vesicle;organelle;vesicle		C2;Calpain_III;Peptidase_C2	ACEVEDO_NORMAL_TISSUE_ADJACENT_TO_LIVER_TUMOR_DN;BERTUCCI_MEDULLARY_VS_DUCTAL_BREAST_CANCER_DN;BROWNE_HCMV_INFECTION_4HR_DN;BRUINS_UVC_RESPONSE_VIA_TP53_GROUP_A;BRUNO_HEMATOPOIESIS;chr11q14;COATES_MACROPHAGE_M1_VS_M2_UP;CREIGHTON_ENDOCRINE_THERAPY_RESISTANCE_3;CYSTEINE_TYPE_ENDOPEPTIDASE_ACTIVITY;CYSTEINE_TYPE_PEPTIDASE_ACTIVITY;DELACROIX_RAR_TARGETS_UP;DELACROIX_RARG_BOUND_MEF;DODD_NASOPHARYNGEA…		0.000146177	0.000169492	17	19.9555	20.8684	21.4988	20.0141	20.3107	20.5261	20.9359	20.9677	4	4	4	4	2.65713	0.00414392	2.2917
Q80Z24	Negr1	NEGR1_MOUSE	Neuronal growth regulator 1	23.1	23.3369	23.6988	23.1205	23.3932	23.0137	23.5248	23.2863	22.4655	23.0842	23.0423	23.007	23.387	23.2153	23.1528	23.4679						behavior;biological adhesion;biological regulation;cell adhesion;cell-cell adhesion;cellular process;feeding behavior;locomotory behavior;positive regulation of biological process;positive regulation of cell projection organization;positive regulation of cellular component organization;positive regulation of cellular process;positive regulation of neuron projection development;regulation of biolo…		anchored to membrane;cell body;cell junction;cell part;cell projection;cell surface;cell-cell junction;extracellular membrane-bounded organelle;extracellular organelle;extracellular region part;extracellular vesicular exosome;intrinsic to membrane;membrane;membrane part;membrane-bounded organelle;membrane-bounded vesicle;neuron projection;neuronal cell body;organelle;plasma membrane;vesicle	Cell adhesion molecules (CAMs)	I-set	AAGCCAT,MIR-135A,MIR-135B;ACAACTT,MIR-382;ACACTCC,MIR-122A;ACTGAAA,MIR-30A-3P,MIR-30E-3P;ATTCTTT,MIR-186;BENPORATH_ES_WITH_H3K27ME3;CAGCTTT,MIR-320;CAGGTG_V$E12_Q6;CAGTATT,MIR-200B,MIR-200C,MIR-429;CAMPS_COLON_CANCER_COPY_NUMBER_DN;CATTTCA,MIR-203;chr1p31;EIF4E_UP;GAUSSMANN_MLL_AF4_FUSION_TARGETS_G_UP;GCANCTGNY_V$MYOD_Q6;GGGTGGRR_V$PAX4_03;GOBERT_OLIGODENDROCYTE_DIFFERENTIATION_DN;GTACTGT,MIR-101…		0.000146177	0.000169492	11	22.9972	22.9633	23.4602	21.6046	23.3141	23.3045	22.8997	23.3058	4	4	4	4	1.10135	0.0547577	1.0693
O08738	Casp6	CASP6_MOUSE	Caspase-6	21.5294	21.6625	16.8675	21.203	22.0914	22.2496	22.3703	22.4361	22.3046	22.146	22.1161	22.2744	22.1579	22.3194	22.484	22.2828	+	+				cell differentiation;cellular developmental process;cellular process;developmental process;epithelial cell differentiation;macromolecule metabolic process;metabolic process;primary metabolic process;protein metabolic process;proteolysis	binding;catalytic activity;endopeptidase activity;hydrolase activity;identical protein binding;peptidase activity;peptidase activity, acting on L-amino acid peptides;protein binding	cell part;cytoplasm;cytoplasmic part;cytosol;intracellular organelle part;intracellular part;nuclear part;nucleoplasm;organelle part	Apoptosis	Peptidase_C14	APOPTOSIS_GO;BIOCARTA_CASPASE_PATHWAY;BIOCARTA_CHEMICAL_PATHWAY;BIOCARTA_DEATH_PATHWAY;BIOCARTA_FAS_PATHWAY;BIOCARTA_HIVNEF_PATHWAY;BIOCARTA_MITOCHONDRIA_PATHWAY;BLALOCK_ALZHEIMERS_DISEASE_INCIPIENT_UP;BLALOCK_ALZHEIMERS_DISEASE_UP;BROWNE_HCMV_INFECTION_18HR_UP;BROWNE_HCMV_INFECTION_30MIN_DN;BROWNE_HCMV_INFECTION_6HR_DN;BRUINS_UVC_RESPONSE_MIDDLE;CELL_DEVELOPMENT;CELLULAR_MACROMOLECULE_METABOLIC_…	REACT_277640;REACT_291081;REACT_336953	0.000146177	0.000169492	3	21.2396	21.8445	NaN	22.5503	21.465	22.2868	22.2103	22.311	3	4	4	4	1.08572	0.014525	0.81862
O08739	Ampd3	AMPD3_MOUSE	AMP deaminase 3	21.2424	21.4161	21.1334	21.298	21.524	21.556	21.526	21.6623	21.4901	21.4897	21.5132	21.3728	21.4919	21.5232	21.4754	21.8607	+					ADP metabolic process;AMP metabolic process;ATP metabolic process;biological regulation;biosynthetic process;cellular biosynthetic process;cellular metabolic compound salvage;cellular metabolic process;cellular nitrogen compound biosynthetic process;cellular nitrogen compound metabolic process;cellular process;energy homeostasis;erythrocyte homeostasis;GTP metabolic process;heterocycle biosynthet…	AMP deaminase activity;binding;catalytic activity;cation binding;deaminase activity;hydrolase activity;hydrolase activity, acting on carbon-nitrogen (but not peptide) bonds;hydrolase activity, acting on carbon-nitrogen (but not peptide) bonds, in cyclic amidines;ion binding;metal ion binding		Purine metabolism	A_deaminase	ACOSTA_PROLIFERATION_INDEPENDENT_MYC_TARGETS_DN;BENPORATH_MYC_TARGETS_WITH_EBOX;BHATI_G2M_ARREST_BY_2METHOXYESTRADIOL_DN;BLALOCK_ALZHEIMERS_DISEASE_UP;BUYTAERT_PHOTODYNAMIC_THERAPY_STRESS_UP;CATABOLIC_PROCESS;CELLULAR_CATABOLIC_PROCESS;chr11p15;CHYLA_CBFA2T3_TARGETS_DN;CREIGHTON_ENDOCRINE_THERAPY_RESISTANCE_3;CTTTGA_V$LEF1_Q2;DANG_BOUND_BY_MYC;DEAMINASE_ACTIVITY;DIAZ_CHRONIC_MEYLOGENOUS_LEUKEMIA_…	REACT_345398	0.000146177	0.000169492	13	21.2035	21.6912	23.2186	20.9037	21.2725	21.5671	21.4664	21.5878	4	4	4	4	2.005	0.0391908	1.5647
O08740	Polr2j	RPB11_MOUSE	DNA-directed RNA polymerase II subunit RPB11	16.7211	16.8303	16.8675	16.907	16.7711	17.0522	20.4675	17.0574	20.438	20.8505	20.5149	20.5071	20.6673	16.5422	20.4344	19.915	+	+				biosynthetic process;cellular biosynthetic process;cellular macromolecule biosynthetic process;cellular macromolecule metabolic process;cellular metabolic process;cellular nitrogen compound metabolic process;cellular process;macromolecule biosynthetic process;macromolecule metabolic process;metabolic process;nitrogen compound metabolic process;nucleic acid metabolic process;nucleobase-containing …	binding;catalytic activity;DNA binding;DNA-directed RNA polymerase activity;LRR domain binding;nucleic acid binding;nucleotidyltransferase activity;protein binding;protein domain specific binding;RNA polymerase activity;transferase activity;transferase activity, transferring phosphorus-containing groups	cell part;DNA-directed RNA polymerase complex;DNA-directed RNA polymerase II, core complex;intracellular membrane-bounded organelle;intracellular organelle;intracellular organelle part;intracellular part;macromolecular complex;membrane-bounded organelle;nuclear DNA-directed RNA polymerase complex;nuclear part;nucleoplasm;nucleoplasm part;nucleus;organelle;organelle part;protein complex;RNA polyme…			BIOPOLYMER_METABOLIC_PROCESS;BRUINS_UVC_RESPONSE_LATE;chr7q11;DNA_DIRECTED_RNA_POLYMERASE_COMPLEX;DNA_DIRECTED_RNA_POLYMERASEII_CORE_COMPLEX;DNA_DIRECTED_RNA_POLYMERASEII_HOLOENZYME;GSE12845_PRE_GC_VS_DARKZONE_GC_TONSIL_BCELL_DN;GSE13306_TREG_RA_VS_TCONV_RA_UP;GSE13411_NAIVE_VS_MEMORY_BCELL_DN;GSE1460_CD4_THYMOCYTE_VS_NAIVE_CD4_TCELL_CORD_BLOOD_DN;GSE15930_STIM_VS_STIM_AND_IFNAB_24H_CD8_T_CELL_UP…	REACT_362602	0.000146177	0.000169492	3	NaN	NaN	NaN	21.01	NaN	20.4675	20.5776	20.3389	0	1	4	3	2.1147	0.00265643	7.59512
O70481	Ubr1	UBR1_MOUSE	E3 ubiquitin-protein ligase UBR1	20.5367	20.8225	20.4456	20.7356	20.6847	20.6467	20.9537	20.6659	20.7738	20.689	20.7835	20.6884	20.677	20.6313	20.3593	20.3237						biological regulation;catabolic process;cellular catabolic process;cellular macromolecule catabolic process;cellular macromolecule metabolic process;cellular metabolic process;cellular process;cellular response to acid;cellular response to amine stimulus;cellular response to amino acid stimulus;cellular response to chemical stimulus;cellular response to endogenous stimulus;cellular response to le…	acid-amino acid ligase activity;amine binding;amino acid binding;binding;carboxylic acid binding;catalytic activity;cation binding;ion binding;leucine binding;ligase activity;ligase activity, forming carbon-nitrogen bonds;metal ion binding;small conjugating protein ligase activity;transition metal ion binding;ubiquitin-protein ligase activity;zinc ion binding	cell part;cytoplasm;cytoplasmic part;cytosol;intracellular part;macromolecular complex;proteasome complex;protein complex;ubiquitin ligase complex		ClpS;zf-UBR	AACTTT_UNKNOWN;ACTGTGA,MIR-27A,MIR-27B;ACTTTAT,MIR-142-5P;ATCATGA,MIR-433;BENPORATH_SOX2_TARGETS;CACTGTG,MIR-128A,MIR-128B;CATTTCA,MIR-203;chr15q15;CTATGCA,MIR-153;CTTGTAT,MIR-381;FORTSCHEGGER_PHF8_TARGETS_DN;GACAATC,MIR-219;GRAESSMANN_APOPTOSIS_BY_DOXORUBICIN_DN;GSE11924_TFH_VS_TH17_CD4_TCELL_UP;GSE11924_TFH_VS_TH2_CD4_TCELL_UP;GSE14308_TH2_VS_NATURAL_TREG_DN;GSE17721_0.5H_VS_24H_LPS_BMDM_DN;GSE…	REACT_343568	0.000146177	0.000169492	18	20.3366	20.3249	22.0936	20.1437	20.6351	20.7377	20.7336	20.4978	4	4	4	4	0.900025	0.185724	0.495477
O08749	Dld	DLDH_MOUSE	Dihydrolipoyl dehydrogenase, mitochondrial	27.3732	27.2439	26.9752	26.9305	26.5285	26.7537	27.0094	26.6457	26.2731	26.6425	26.6226	26.4023	26.565	26.5057	26.4693	26.5186	+	+				anatomical structure morphogenesis;biological regulation;cell maturation;cell redox homeostasis;cellular chemical homeostasis;cellular developmental process;cellular homeostasis;cellular ion homeostasis;cellular metabolic process;cellular process;cellular process involved in reproduction;chemical homeostasis;developmental maturation;developmental process;developmental process involved in reproduc…	binding;catalytic activity;coenzyme binding;cofactor binding;dihydrolipoyl dehydrogenase activity;flavin adenine dinucleotide binding;oxidoreductase activity;oxidoreductase activity, acting on a sulfur group of donors;oxidoreductase activity, acting on a sulfur group of donors, NAD or NADP as acceptor;oxidoreductase activity, acting on NADH or NADPH	acrosomal matrix;cell part;cell projection;cilium;cytoplasmic part;cytoplasmic vesicle part;intracellular membrane-bounded organelle;intracellular organelle;intracellular organelle lumen;intracellular organelle part;intracellular part;membrane-bounded organelle;membrane-enclosed lumen;mitochondrial matrix;mitochondrial part;mitochondrion;myelin sheath;nuclear part;nucleoplasm;organelle;organelle …	Citrate cycle (TCA cycle);Glycine, serine and threonine metabolism;Glycolysis / Gluconeogenesis;Pyruvate metabolism;Valine, leucine and isoleucine degradation	Pyr_redox;Pyr_redox_2;Pyr_redox_dim	AGUIRRE_PANCREATIC_CANCER_COPY_NUMBER_UP;BLALOCK_ALZHEIMERS_DISEASE_DN;BURTON_ADIPOGENESIS_6;chr7q31;CYTOPLASM;CYTOPLASMIC_PART;DIAZ_CHRONIC_MEYLOGENOUS_LEUKEMIA_UP;ELECTRON_CARRIER_ACTIVITY;ENK_UV_RESPONSE_KERATINOCYTE_DN;FEVR_CTNNB1_TARGETS_DN;FLECHNER_BIOPSY_KIDNEY_TRANSPLANT_OK_VS_DONOR_UP;FLECHNER_BIOPSY_KIDNEY_TRANSPLANT_REJECTED_VS_OK_DN;GATTGGY_V$NFY_Q6_01;GNF2_SMC1L1;GSE11924_TFH_VS_TH1_…	REACT_278177;REACT_293106;REACT_305961;REACT_306383;REACT_329568;REACT_333358	0.000146177	0.000169492	17	26.6412	26.4827	27.0213	26.4914	27.1307	26.7343	26.4851	26.5146	4	4	4	4	3.1579	0.00343299	2.45492
O08756	Hsd17b10	HCD2_MOUSE	3-hydroxyacyl-CoA dehydrogenase type-2	23.0917	22.9755	22.8742	22.9623	22.822	22.9353	22.8425	22.9948	22.5599	22.7858	22.6615	22.7218	22.7702	22.8182	22.5487	22.1616	+					cellular macromolecule metabolic process;cellular metabolic process;cellular nitrogen compound metabolic process;cellular process;macromolecule metabolic process;metabolic process;ncRNA metabolic process;ncRNA processing;nitrogen compound metabolic process;nucleic acid metabolic process;nucleobase-containing compound metabolic process;primary metabolic process;RNA metabolic process;RNA processing…	3-hydroxy-2-methylbutyryl-CoA dehydrogenase activity;3-hydroxyacyl-CoA dehydrogenase activity;catalytic activity;oxidoreductase activity;oxidoreductase activity, acting on CH-OH group of donors;oxidoreductase activity, acting on the CH-OH group of donors, NAD or NADP as acceptor;steroid dehydrogenase activity;steroid dehydrogenase activity, acting on the CH-OH group of donors, NAD or NADP as acce…	cell part;cytoplasmic part;endoplasmic reticulum;intracellular membrane-bounded organelle;intracellular organelle;intracellular organelle part;intracellular part;membrane;membrane-bounded organelle;mitochondrial inner membrane;mitochondrial membrane;mitochondrial part;mitochondrion;organelle;organelle inner membrane;organelle membrane;organelle part		adh_short	BOYAULT_LIVER_CANCER_SUBCLASS_G1_DN;BRUNO_HEMATOPOIESIS;chrxp11;CYCLIN_D1_KE_.V1_UP;CYCLIN_D1_UP.V1_UP;CYTOPLASM;CYTOPLASMIC_PART;DURCHDEWALD_SKIN_CARCINOGENESIS_UP;GATTGGY_V$NFY_Q6_01;GGGYGTGNY_UNKNOWN;GOLDRATH_NAIVE_VS_EFF_CD8_TCELL_UP;GOTZMANN_EPITHELIAL_TO_MESENCHYMAL_TRANSITION_DN;GSE13738_RESTING_VS_TCR_ACTIVATED_CD4_TCELL_DN;GSE14000_4H_VS_16H_LPS_DC_TRANSLATED_RNA_UP;GSE1460_INTRATHYMIC_T…		0.000146177	0.000169492	5	22.86	22.8113	NaN	23.0841	22.9759	22.8986	22.6823	22.5747	4	4	4	4	1.7227	0.0294526	2.3761
O08759	Ube3a	UBE3A_MOUSE	Ubiquitin-protein ligase E3A	21.7239	21.7561	21.744	21.7394	21.8226	21.9345	21.7433	21.8743	22.0781	22.0236	21.8634	22.0344	21.9062	21.8687	21.996	22.2401						androgen receptor signaling pathway;biological regulation;catabolic process;cellular catabolic process;cellular component organization;cellular component organization or biogenesis;cellular macromolecule catabolic process;cellular macromolecule metabolic process;cellular membrane organization;cellular metabolic process;cellular process;cellular process involved in reproduction;cellular protein me…	acid-amino acid ligase activity;binding;catalytic activity;cation binding;ion binding;ligase activity;ligase activity, forming carbon-nitrogen bonds;metal ion binding;protein binding transcription factor activity;small conjugating protein ligase activity;transcription coactivator activity;transcription cofactor activity;transcription factor binding transcription factor activity;ubiquitin-protein …	cell part;cytoplasmic part;cytosol;intracellular membrane-bounded organelle;intracellular organelle;intracellular part;macromolecular complex;membrane-bounded organelle;nucleus;organelle;proteasome complex;protein complex	Ubiquitin mediated proteolysis	HECT	AAAYWAACM_V$HFH4_01;AAGWWRNYGGC_UNKNOWN;ACCATTT,MIR-522;ANATOMICAL_STRUCTURE_DEVELOPMENT;ATGTACA,MIR-493;ATTCTTT,MIR-186;BIOCARTA_PROTEASOME_PATHWAY;BIOPOLYMER_CATABOLIC_PROCESS;BIOPOLYMER_METABOLIC_PROCESS;BRAIN_DEVELOPMENT;BRIDEAU_IMPRINTED_GENES;BROWNE_HCMV_INFECTION_20HR_UP;BROWNE_HCMV_INFECTION_48HR_DN;BROWNE_HCMV_INFECTION_4HR_UP;BRUINS_UVC_RESPONSE_LATE;CAGTGTT,MIR-141,MIR-200A;CATABOLIC_P…	REACT_343568	0.000146177	0.000169492	25	21.9014	21.7338	23.4241	21.8685	21.7409	21.8437	21.9999	22.0028	4	4	4	4	2.01448	0.0516477	2.80253
O08784	Tcof1	TCOF_MOUSE	Treacle protein	19.5264	19.5173	19.8679	19.3697	16.7711	19.4605	19.8247	19.8179	19.4585	19.6881	19.6516	19.663	19.6429	19.6088	19.4866	19.383						biosynthetic process;cellular biosynthetic process;cellular macromolecule biosynthetic process;cellular macromolecule metabolic process;cellular metabolic process;cellular nitrogen compound metabolic process;cellular process;establishment of localization;macromolecule biosynthetic process;macromolecule metabolic process;metabolic process;nitrogen compound metabolic process;nucleic acid metabolic …		cell part;cytoplasm;intracellular membrane-bounded organelle;intracellular non-membrane-bounded organelle;intracellular organelle;intracellular organelle part;intracellular part;membrane-bounded organelle;non-membrane-bounded organelle;nuclear part;nucleolus;nucleus;organelle;organelle part	Ribosome biogenesis in eukaryotes	Treacle	ALFANO_MYC_TARGETS;ALONSO_METASTASIS_DN;ANATOMICAL_STRUCTURE_DEVELOPMENT;BAE_BRCA1_TARGETS_DN;BERTUCCI_MEDULLARY_VS_DUCTAL_BREAST_CANCER_UP;BILD_MYC_ONCOGENIC_SIGNATURE;BLALOCK_ALZHEIMERS_DISEASE_INCIPIENT_UP;BLALOCK_ALZHEIMERS_DISEASE_UP;BROWNE_HCMV_INFECTION_4HR_DN;CACGTG_V$MYC_Q2;chr5q31;CTTTGT_V$LEF1_Q2;DAIRKEE_TERT_TARGETS_UP;FERREIRA_EWINGS_SARCOMA_UNSTABLE_VS_STABLE_UP;GINESTIER_BREAST_CAN…		0.000146177	0.000169492	8	19.1597	18.6368	NaN	20.1624	19.5704	19.701	19.6153	19.5303	4	3	4	4	0.226405	0.330331	0.144774
Q7TQD2	Tppp	TPPP_MOUSE	Tubulin polymerization-promoting protein	23.6544	24.3101	23.9955	23.5215	24.0317	23.6559	23.883	23.6155	22.8551	23.0223	23.014	23.1097	23.2163	23.5134	23.1329	23.853	+	+				biological regulation;cellular component assembly;cellular component assembly at cellular level;cellular component organization;cellular component organization at cellular level;cellular component organization or biogenesis;cellular component organization or biogenesis at cellular level;cellular macromolecular complex assembly;cellular macromolecular complex subunit organization;cellular process;…	binding;cytoskeletal protein binding;microtubule binding;protein binding;tubulin binding	cell part;cytoplasm;cytoplasmic part;cytoskeletal part;intracellular membrane-bounded organelle;intracellular organelle;intracellular organelle part;intracellular part;macromolecular complex;membrane-bounded organelle;microtubule;myelin sheath;nucleus;organelle;organelle part;perinuclear region of cytoplasm;protein complex		p25-alpha	ACATTCC,MIR-1,MIR-206;ATTACAT,MIR-380-3P;BILD_E2F3_ONCOGENIC_SIGNATURE;CELL_FRACTION;CELLULAR_COMPONENT_ASSEMBLY;CELLULAR_MACROMOLECULE_METABOLIC_PROCESS;CELLULAR_PROTEIN_METABOLIC_PROCESS;chr5p15;CYTOPLASM;CYTOPLASMIC_PART;CYTOSKELETAL_PROTEIN_BINDING;CYTOSKELETON_ORGANIZATION_AND_BIOGENESIS;DODD_NASOPHARYNGEAL_CARCINOMA_UP;E2F3_UP.V1_UP;GOBERT_OLIGODENDROCYTE_DIFFERENTIATION_DN;GRADE_COLON_CANC…		0.000146177	0.000169492	11	23.7537	23.3165	25.4219	23.5159	23.8704	23.7965	23.0003	23.4289	4	4	4	4	2.67641	0.0032747	2.47851
O08788	Dctn1	DCTN1_MOUSE	Dynactin subunit 1	23.5495	23.6743	23.6441	23.5522	23.7465	23.6467	23.5977	23.7868	23.4384	23.5796	23.5039	23.5837	23.6969	23.7894	23.4901	23.9214						biological regulation;cellular component movement;cellular component organization;cellular component organization at cellular level;cellular component organization or biogenesis;cellular component organization or biogenesis at cellular level;cellular process;cytoplasmic microtubule organization;cytoskeleton organization;cytoskeleton-dependent intracellular transport;endosome transport;establishme…	catalytic activity;hydrolase activity;hydrolase activity, acting on acid anhydrides;hydrolase activity, acting on acid anhydrides, in phosphorus-containing anhydrides;motor activity;nucleoside-triphosphatase activity;pyrophosphatase activity	cell leading edge;cell part;centrosome;chromosomal part;cytoplasm;cytoplasmic part;cytoskeletal part;dynactin complex;dynein complex;intracellular non-membrane-bounded organelle;intracellular organelle;intracellular organelle part;intracellular part;kinetochore;macromolecular complex;membrane;membrane part;microtubule;microtubule associated complex;microtubule organizing center;non-membrane-bound…	Huntington's disease;Vasopressin-regulated water reabsorption	CAP_GLY;Dynactin	BROWNE_HCMV_INFECTION_48HR_DN;CAGCTG_V$AP4_Q5;CAGGTA_V$AREB6_01;CAGGTG_V$E12_Q6;chr2p13;CTCAGGG,MIR-125B,MIR-125A;CYTAGCAAY_UNKNOWN;CYTOPLASM;CYTOSKELETAL_PART;CYTOSKELETON;DARWICHE_PAPILLOMA_RISK_HIGH_DN;DARWICHE_PAPILLOMA_RISK_LOW_DN;DARWICHE_SKIN_TUMOR_PROMOTER_DN;DARWICHE_SQUAMOUS_CELL_CARCINOMA_DN;DAZARD_RESPONSE_TO_UV_NHEK_UP;ENK_UV_RESPONSE_KERATINOCYTE_UP;GGGTGGRR_V$PAX4_03;GRADE_COLON_CA…	REACT_272448;REACT_276302;REACT_286537;REACT_316383;REACT_328862;REACT_345278	0.000146177	0.000169492	46	23.3876	23.4532	24.1906	23.5204	23.605	23.6945	23.5264	23.7245	4	4	4	4	1.00333	0.240673	0.8368
P00158	Mt-Cyb	CYB_MOUSE	Cytochrome b	20.9754	16.8303	16.8675	21.9976	22.6482	22.4939	16.7683	22.2829	20.2829	22.147	20.5739	22.2605	21.7489	16.5422	16.367	16.1942	+	+	+			cellular metabolic process;cellular process;electron transport chain;generation of precursor metabolites and energy;metabolic process;mitochondrial electron transport, ubiquinol to cytochrome c;oxidation-reduction process;respiratory electron transport chain	binding;catalytic activity;cation binding;cation transmembrane transporter activity;electron carrier activity;hydrogen ion transmembrane transporter activity;inorganic cation transmembrane transporter activity;ion binding;ion transmembrane transporter activity;metal ion binding;monovalent inorganic cation transmembrane transporter activity;oxidoreductase activity;oxidoreductase activity, acting o…	cell part;cytoplasmic part;intracellular membrane-bounded organelle;intracellular organelle;intracellular organelle part;intracellular part;macromolecular complex;membrane;membrane part;membrane-bounded organelle;mitochondrial inner membrane;mitochondrial membrane;mitochondrial part;mitochondrion;organelle;organelle inner membrane;organelle membrane;organelle part;protein complex;respiratory chai…	Alzheimer's disease;Cardiac muscle contraction;Huntington's disease;Oxidative phosphorylation;Parkinson's disease	Cytochrom_B_C;Cytochrom_B_N_2		REACT_278797	0.000249906	0.000313529	2	NaN	22.103	NaN	NaN	21.4865	22.475	21.3161	21.7489	2	3	4	1	0.74693	0.0280434	0.723636
Q3TTA7	Cblb	CBLB_MOUSE	E3 ubiquitin-protein ligase CBL-B	19.4221	16.8303	16.8675	19.1305	16.7711	19.2958	18.899	17.0574	19.7717	20.1378	19.6108	19.048	19.1239	18.5922	16.367	18.1009	+	+				biological regulation;cell activation;cell surface receptor linked signaling pathway;cellular process;cellular response to stimulus;immune response;immune system process;intracellular signal transduction;leukocyte activation;lymphocyte activation;negative regulation of alpha-beta T cell activation;negative regulation of alpha-beta T cell proliferation;negative regulation of antigen receptor-media…	acid-amino acid ligase activity;binding;calcium ion binding;catalytic activity;cation binding;ion binding;ligase activity;ligase activity, forming carbon-nitrogen bonds;metal ion binding;molecular transducer activity;signal transducer activity;small conjugating protein ligase activity;transition metal ion binding;ubiquitin-protein ligase activity;zinc ion binding	cell part;cytoplasm;intracellular organelle part;intracellular part;nuclear part;nucleoplasm;organelle part	Bacterial invasion of epithelial cells;Chronic myeloid leukemia;Endocytosis;ErbB signaling pathway;Insulin signaling pathway;Jak-STAT signaling pathway;Pathways in cancer;T cell receptor signaling pathway;Ubiquitin mediated proteolysis	Cbl_N;Cbl_N2;Cbl_N3;UBA	AACTTT_UNKNOWN;ACEVEDO_LIVER_CANCER_UP;AMUNDSON_GAMMA_RADIATION_RESISTANCE;BAELDE_DIABETIC_NEPHROPATHY_DN;BLALOCK_ALZHEIMERS_DISEASE_UP;BLUM_RESPONSE_TO_SALIRASIB_UP;BROWNE_HCMV_INFECTION_10HR_DN;BROWNE_HCMV_INFECTION_10HR_UP;BROWNE_HCMV_INFECTION_18HR_UP;BROWNE_HCMV_INFECTION_6HR_DN;BUYTAERT_PHOTODYNAMIC_THERAPY_STRESS_UP;CASORELLI_ACUTE_PROMYELOCYTIC_LEUKEMIA_UP;CATION_BINDING;CELLULAR_LOCALIZA…		0.000146177	0.000169492	3	18.7763	19.504	NaN	18.0474	19.2763	19.0974	19.6421	18.6057	2	2	4	3	0.761848	0.0340476	1.11687
O08807	Prdx4	PRDX4_MOUSE	Peroxiredoxin-4	22.1215	21.7492	21.5813	21.5814	21.4769	21.359	21.2131	21.6238	21.6044	21.312	21.2893	20.8735	21.6493	21.6011	21.0171	20.5884						4-hydroxyproline metabolic process;amine metabolic process;anatomical structure development;biological regulation;carboxylic acid metabolic process;cell redox homeostasis;cellular amine metabolic process;cellular amino acid metabolic process;cellular component organization;cellular component organization at cellular level;cellular component organization or biogenesis;cellular component organizati…	antioxidant activity;binding;catalytic activity;identical protein binding;oxidoreductase activity;oxidoreductase activity, acting on paired donors, with incorporation or reduction of molecular oxygen;oxidoreductase activity, acting on peroxide as acceptor;peroxidase activity;peroxiredoxin activity;protein binding;protein dimerization activity;protein homodimerization activity	cell part;cytoplasm;cytoplasmic part;cytosol;endoplasmic reticulum;extracellular membrane-bounded organelle;extracellular organelle;extracellular region part;extracellular space;extracellular vesicular exosome;intracellular membrane-bounded organelle;intracellular organelle;intracellular part;membrane-bounded organelle;membrane-bounded vesicle;mitochondrion;nucleus;organelle;smooth endoplasmic re…		1-cysPrx_C;AhpC-TSA	AACTTT_UNKNOWN;AFFAR_YY1_TARGETS_DN;ANTIOXIDANT_ACTIVITY;BAE_BRCA1_TARGETS_UP;BASSO_B_LYMPHOCYTE_NETWORK;BIOPOLYMER_METABOLIC_PROCESS;BIOPOLYMER_MODIFICATION;BLALOCK_ALZHEIMERS_DISEASE_DN;BORCZUK_MALIGNANT_MESOTHELIOMA_UP;BRUNO_HEMATOPOIESIS;BURTON_ADIPOGENESIS_8;CAIRO_HEPATOBLASTOMA_CLASSES_UP;CASORELLI_ACUTE_PROMYELOCYTIC_LEUKEMIA_DN;CELLULAR_MACROMOLECULE_METABOLIC_PROCESS;CELLULAR_PROTEIN_MET…		0.000146177	0.000169492	4	21.3961	21.2503	NaN	22.0109	21.7583	21.4182	21.2698	21.214	4	4	4	4	0.837459	0.0685145	1.32034
O08808	Diaph1	DIAP1_MOUSE	Protein diaphanous homolog 1	21.0606	20.9645	20.9245	20.9122	21.0764	20.9228	21.046	20.892	20.7537	20.6802	20.8381	20.7012	20.7277	20.8255	20.4624	20.5536	+					actin cytoskeleton organization;actin filament organization;actin filament polymerization;actin filament-based process;actin polymerization or depolymerization;biological regulation;cell projection organization;cellular component assembly;cellular component assembly at cellular level;cellular component organization;cellular component organization at cellular level;cellular component organization …	actin binding;binding;cytoskeletal protein binding;enzyme binding;GTPase binding;identical protein binding;ion channel binding;profilin binding;protein binding;Ras GTPase binding;Rho GTPase binding;small GTPase binding	brush border;cell part;cell projection;cell projection membrane;cell projection part;cytoplasm;cytoskeletal part;intracellular non-membrane-bounded organelle;intracellular organelle;intracellular organelle part;intracellular part;leading edge membrane;membrane part;mitotic spindle;neuron projection;non-membrane-bounded organelle;organelle;organelle part;plasma membrane part;ruffle membrane;spindle	Focal adhesion;Regulation of actin cytoskeleton;Shigellosis	Drf_DAD;Drf_FH1;Drf_FH3;Drf_GBD;FH2	AACTTT_UNKNOWN;ACCAAAG,MIR-9;ACEVEDO_LIVER_CANCER_DN;ACEVEDO_NORMAL_TISSUE_ADJACENT_TO_LIVER_TUMOR_DN;AGGAAGC,MIR-516-3P;AMBROSINI_FLAVOPIRIDOL_TREATMENT_TP53;AMIT_EGF_RESPONSE_480_HELA;BERENJENO_TRANSFORMED_BY_RHOA_UP;BIOCARTA_ECM_PATHWAY;BIOCARTA_MAL_PATHWAY;BIOCARTA_RHO_PATHWAY;CACGTG_V$MYC_Q2;CAGGTA_V$AREB6_01;CATRRAGC_UNKNOWN;chr5q31;GGGAGGRR_V$MAZ_Q6;GGGCGGR_V$SP1_Q6;GRADE_COLON_CANCER_UP;G…	REACT_358264	0.000146177	0.000169492	21	20.8564	20.9164	22.5346	19.4182	20.9655	20.9843	20.7433	20.6423	4	4	4	4	2.88119	0.0151586	2.41667
O08810	Eftud2	U5S1_MOUSE	116 kDa U5 small nuclear ribonucleoprotein component	22.7163	22.5798	22.7466	22.6395	22.501	22.5483	22.6636	22.6135	22.8404	22.8318	22.8072	22.7939	22.7634	22.6639	22.7192	21.8853						cellular macromolecule metabolic process;cellular metabolic process;cellular nitrogen compound metabolic process;cellular process;macromolecule metabolic process;metabolic process;mRNA metabolic process;mRNA processing;nitrogen compound metabolic process;nucleic acid metabolic process;nucleobase-containing compound metabolic process;primary metabolic process;RNA metabolic process;RNA processing;R…	binding;catalytic activity;GTP binding;GTPase activity;guanyl nucleotide binding;guanyl ribonucleotide binding;hydrolase activity;hydrolase activity, acting on acid anhydrides;hydrolase activity, acting on acid anhydrides, in phosphorus-containing anhydrides;nucleoside-triphosphatase activity;nucleotide binding;purine nucleotide binding;purine ribonucleoside triphosphate binding;purine ribonucleo…	Cajal body;catalytic step 2 spliceosome;cell part;cytoplasm;intracellular membrane-bounded organelle;intracellular organelle;intracellular organelle part;intracellular part;macromolecular complex;membrane;membrane-bounded organelle;nuclear body;nuclear part;nuclear speck;nucleoplasm;nucleoplasm part;nucleus;organelle;organelle part;ribonucleoprotein complex;spliceosomal complex	Spliceosome	EFG_C;EFG_II;EFG_IV;GTP_EFTU;GTP_EFTU_D2	ABRAMSON_INTERACT_WITH_AIRE;BENPORATH_MYC_MAX_TARGETS;BIOPOLYMER_METABOLIC_PROCESS;CACGTG_V$MYC_Q2;CAMPS_COLON_CANCER_COPY_NUMBER_UP;chr17q21;DANG_REGULATED_BY_MYC_UP;GRADE_COLON_AND_RECTAL_CANCER_UP;GSE13306_RA_VS_UNTREATED_TCONV_DN;GSE13306_TREG_RA_VS_TCONV_RA_UP;GSE14000_UNSTIM_VS_4H_LPS_DC_UP;GSE14350_IL2RB_KO_VS_WT_TREG_UP;GSE15930_NAIVE_VS_48H_IN_VITRO_STIM_IFNAB_CD8_TCELL_DN;GSE15930_NAIVE…	REACT_271571;REACT_307866	0.000146177	0.000169492	28	22.8493	22.5399	23.756	23.0132	22.6705	22.5816	22.8183	22.508	4	4	4	4	0.593821	0.226889	2.03094
O08811	Ercc2	ERCC2_MOUSE	General transcription and DNA repair factor IIH helicase subunit XPD	18.9911	18.7369	16.8675	19.3488	19.1765	19.371	19.1369	19.2696	19.4962	19.8372	19.5863	19.5237	19.6755	19.3782	18.9636	18.9149	+	+				aging;anatomical structure development;anatomical structure formation involved in morphogenesis;anatomical structure maturation;apoptosis;biological regulation;biomineral tissue development;biosynthetic process;bone mineralization;cell death;cell differentiation;cell division;cell maturation;cell proliferation;cellular biosynthetic process;cellular component assembly;cellular component assembly a…	4 iron, 4 sulfur cluster binding;5'-3' DNA helicase activity;adenyl nucleotide binding;adenyl ribonucleotide binding;ATP binding;ATPase activity;ATPase activity, coupled;ATP-dependent DNA helicase activity;ATP-dependent helicase activity;binding;catalytic activity;cation binding;DNA binding;DNA helicase activity;DNA-dependent ATPase activity;helicase activity;hydrolase activity;hydrolase activity…	carboxy-terminal domain protein kinase complex;cell part;core TFIIH complex;cyclin-dependent protein kinase activating kinase holoenzyme complex;cytoplasm;cytoskeletal part;holo TFIIH complex;intracellular membrane-bounded organelle;intracellular non-membrane-bounded organelle;intracellular organelle;intracellular organelle part;intracellular part;macromolecular complex;membrane-bounded organelle…	Basal transcription factors;Nucleotide excision repair	DEAD_2;DUF1227;Helicase_C_2	ANATOMICAL_STRUCTURE_DEVELOPMENT;ANATOMICAL_STRUCTURE_MORPHOGENESIS;APOPTOSIS_GO;BIOPOLYMER_CATABOLIC_PROCESS;BIOPOLYMER_METABOLIC_PROCESS;BROWNE_HCMV_INFECTION_12HR_DN;BROWNE_HCMV_INFECTION_14HR_DN;BROWNE_HCMV_INFECTION_24HR_DN;BYSTROEM_CORRELATED_WITH_IL5_DN;CATABOLIC_PROCESS;CELL_CYCLE_CHECKPOINT_GO_0000075;CELL_CYCLE_GO_0007049;CELL_DEVELOPMENT;CELLULAR_CATABOLIC_PROCESS;chr19q13;DACOSTA_UV_R…	REACT_279019;REACT_282911;REACT_283211;REACT_289837;REACT_296099;REACT_296420;REACT_296832;REACT_299576;REACT_302527;REACT_308057;REACT_314261;REACT_315215;REACT_326102;REACT_329615;REACT_338828;REACT_342690;REACT_349121;REACT_350574;REACT_354877	0.000146177	0.000169492	5	18.8776	18.6703	NaN	19.0922	19.0256	19.2385	19.6108	19.2331	3	4	4	4	0.982551	0.0269297	1.04072
O08842	Gfra2	GFRA2_MOUSE	GDNF family receptor alpha-2	16.7211	18.3254	16.8675	18.3596	19.0625	17.0522	17.5799	17.0574	18.799	18.9603	19.0763	18.8565	18.8138	18.7524	19.1173	21.5593	+	+	+			anatomical structure development;biological regulation;cell surface receptor linked signaling pathway;cellular process;cellular response to stimulus;developmental process;enzyme linked receptor protein signaling pathway;negative regulation of biological process;negative regulation of cellular metabolic process;negative regulation of cellular process;negative regulation of cellular protein metabol…	binding;cytokine binding;cytokine receptor activity;glial cell-derived neurotrophic factor receptor activity;molecular transducer activity;protein binding;receptor activity;signal transducer activity;signaling receptor activity;transmembrane signaling receptor activity	anchored to membrane;cell part;intrinsic to membrane;membrane;membrane part;plasma membrane		GDNF	AGGAAGC,MIR-516-3P;ASTIER_INTEGRIN_SIGNALING;BENPORATH_SUZ12_TARGETS;CELL_SURFACE_RECEPTOR_LINKED_SIGNAL_TRANSDUCTION_GO_0007166;CHEBOTAEV_GR_TARGETS_DN;chr8p21;CTAGGAA,MIR-384;CTCTGGA,MIR-520A,MIR-525;DELYS_THYROID_CANCER_DN;ENZYME_LINKED_RECEPTOR_PROTEIN_SIGNALING_PATHWAY;EXTRINSIC_TO_MEMBRANE;GCAAAAA,MIR-129;GOBERT_OLIGODENDROCYTE_DIFFERENTIATION_DN;GRAESSMANN_APOPTOSIS_BY_SERUM_DEPRIVATION_UP…		0.000146177	0.000169492	5	NaN	NaN	21.5042	18.6335	18.3425	18.3212	18.923	19.5607	2	2	4	4	1.54073	0.00592484	1.61752
O08848	RO60	RO60_MOUSE	60 kDa SS-A/Ro ribonucleoprotein	20.7279	20.8165	20.5279	20.1738	20.7967	20.6534	20.9077	20.6839	20.3542	20.9063	20.5389	20.494	20.6736	20.9486	20.6918	20.6898						anatomical structure development;anatomical structure morphogenesis;biological regulation;cell part morphogenesis;cell projection morphogenesis;cell projection organization;cell surface receptor linked signaling pathway;cellular component morphogenesis;cellular component organization;cellular component organization at cellular level;cellular component organization or biogenesis;cellular component…	binding;cation binding;ion binding;metal ion binding;misfolded RNA binding;nucleic acid binding;RNA binding;snRNA binding;U2 snRNA binding	cell part;cytoplasm;intracellular membrane-bounded organelle;intracellular organelle;intracellular organelle part;intracellular part;macromolecular complex;membrane-bounded organelle;nuclear part;nucleoplasm;nucleus;organelle;organelle part;ribonucleoprotein complex	Systemic lupus erythematosus	TROVE	ACTGTAG,MIR-139;ACTGTGA,MIR-27A,MIR-27B;BIOPOLYMER_METABOLIC_PROCESS;BLALOCK_ALZHEIMERS_DISEASE_UP;BORCZUK_MALIGNANT_MESOTHELIOMA_UP;BOYAULT_LIVER_CANCER_SUBCLASS_G1_UP;BROWNE_HCMV_INFECTION_18HR_UP;BROWNE_HCMV_INFECTION_30MIN_DN;BROWNE_HCMV_INFECTION_6HR_DN;CAGCTTT,MIR-320;CAGGTG_V$E12_Q6;chr1q31;CUI_TCF21_TARGETS_2_DN;DIAZ_CHRONIC_MEYLOGENOUS_LEUKEMIA_UP;DODD_NASOPHARYNGEAL_CARCINOMA_DN;DOUGLAS…		0.000146177	0.000169492	11	20.597	19.9765	22.5061	20.5192	20.5616	20.7604	20.5734	20.751	4	4	4	4	0.425026	0.354736	0.0217467
O08908	Pik3r2	P85B_MOUSE	Phosphatidylinositol 3-kinase regulatory subunit beta	19.4107	18.7577	18.9083	19.2282	18.5983	18.7921	18.198	17.0574	19.0703	18.9486	19.1429	18.4681	18.9184	18.3279	18.1331	18.5709	+					biological regulation;carbohydrate homeostasis;cell surface receptor linked signaling pathway;cellular chemical homeostasis;cellular component organization;cellular component organization or biogenesis;cellular glucose homeostasis;cellular homeostasis;cellular lipid metabolic process;cellular metabolic process;cellular process;cellular response to chemical stimulus;cellular response to endogenous…	1-phosphatidylinositol-3-kinase regulator activity;binding;enzyme binding;enzyme regulator activity;kinase regulator activity;phosphatase binding;phosphatidylinositol 3-kinase regulator activity;protein binding;protein dimerization activity;protein heterodimerization activity;protein phosphatase binding;receptor binding;receptor tyrosine kinase binding;transcription factor binding	adherens junction;anchoring junction;cell junction;cell part;cell-substrate adherens junction;cell-substrate junction;cytoplasmic part;cytosolic part;focal adhesion;intracellular membrane-bounded organelle;intracellular organelle;intracellular part;macromolecular complex;membrane-bounded organelle;nucleus;organelle;phosphatidylinositol 3-kinase complex;protein complex	Acute myeloid leukemia;Aldosterone-regulated sodium reabsorption;Amoebiasis;Apoptosis;B cell receptor signaling pathway;Bacterial invasion of epithelial cells;Carbohydrate digestion and absorption;Chagas disease (American trypanosomiasis);Chemokine signaling pathway;Chronic myeloid leukemia;Colorectal cancer;Endometrial cancer;ErbB signaling pathway;Fc epsilon RI signaling pathway;Fc gamma R-medi…	RhoGAP;SH2	AAGCCAT,MIR-135A,MIR-135B;ANTI_APOPTOSIS;APOPTOSIS_GO;BENPORATH_NANOG_TARGETS;BONOME_OVARIAN_CANCER_SURVIVAL_SUBOPTIMAL_DEBULKING;CELL_DEVELOPMENT;CHICAS_RB1_TARGETS_CONFLUENT;chr19q13;CHYLA_CBFA2T3_TARGETS_DN;CRGAARNNNNCGA_UNKNOWN;DELACROIX_RARG_BOUND_MEF;DING_LUNG_CANCER_MUTATED_FREQUENTLY;FOSTER_KDM1A_TARGETS_DN;GARGALOVIC_RESPONSE_TO_OXIDIZED_PHOSPHOLIPIDS_YELLOW_DN;GGGCGGR_V$SP1_Q6;GSE13229_…	REACT_272541;REACT_276590;REACT_278498;REACT_280416;REACT_280649;REACT_292208;REACT_293748;REACT_297947;REACT_301936;REACT_315885;REACT_332866;REACT_333474;REACT_340694;REACT_341964	0.000146177	0.000169492	5	19.3942	18.9898	NaN	19.611	19.0762	18.5294	18.9075	18.4876	4	3	4	4	1.15364	0.0216522	0.339941
O08914	Faah	FAAH1_MOUSE	Fatty-acid amide hydrolase 1	20.5248	20.7973	20.7531	20.6121	20.7047	20.8774	20.9064	20.8211	20.5124	20.8917	20.727	20.6595	20.7974	20.973	20.8724	20.3391						carboxylic acid catabolic process;carboxylic acid metabolic process;catabolic process;cellular catabolic process;cellular ketone metabolic process;cellular lipid catabolic process;cellular lipid metabolic process;cellular metabolic process;cellular process;fatty acid catabolic process;fatty acid metabolic process;lipid catabolic process;lipid metabolic process;metabolic process;monocarboxylic aci…	acylglycerol lipase activity;carbon-nitrogen ligase activity, with glutamine as amido-N-donor;carboxylic ester hydrolase activity;catalytic activity;fatty acid amide hydrolase activity;hydrolase activity;hydrolase activity, acting on carbon-nitrogen (but not peptide) bonds;hydrolase activity, acting on carbon-nitrogen (but not peptide) bonds, in linear amides;hydrolase activity, acting on ester b…	cell part;cytoplasmic part;endoplasmic reticulum membrane;endoplasmic reticulum part;Golgi apparatus part;Golgi membrane;integral to membrane;intracellular organelle part;intracellular part;intrinsic to membrane;membrane;membrane part;organelle membrane;organelle part		Amidase	ACEVEDO_LIVER_CANCER_DN;ACEVEDO_LIVER_TUMOR_VS_NORMAL_ADJACENT_TISSUE_DN;ALCALAY_AML_BY_NPM1_LOCALIZATION_DN;BOCHKIS_FOXA2_TARGETS;CAIRO_HEPATOBLASTOMA_DN;CARBOXYLIC_ACID_METABOLIC_PROCESS;CELL_FRACTION;CELLULAR_LIPID_METABOLIC_PROCESS;CHARAFE_BREAST_CANCER_LUMINAL_VS_MESENCHYMAL_UP;CHEMNITZ_RESPONSE_TO_PROSTAGLANDIN_E2_DN;chr1p35;CRX_DN.V1_UP;DELYS_THYROID_CANCER_DN;DIAZ_CHRONIC_MEYLOGENOUS_LEUK…		0.000146177	0.000169492	5	19.848	20.0852	NaN	NaN	20.6718	20.8274	20.6976	20.7455	4	4	4	4	0.197905	0.632315	0.0933995
O08915	Aip	AIP_MOUSE	AH receptor-interacting protein	21.0786	20.7596	20.7288	20.5799	20.6865	20.6115	21.0348	20.5501	20.6463	20.6444	20.8403	20.8851	20.8757	20.7096	21.0794	20.9467						biological regulation;cellular macromolecule metabolic process;cellular metabolic process;cellular process;cellular protein metabolic process;establishment of localization;establishment of localization in cell;establishment of protein localization;establishment of protein localization in mitochondrion;establishment of protein localization to organelle;intracellular protein transport;intracellular…	aryl hydrocarbon receptor binding;binding;GAF domain binding;protein binding;protein binding transcription factor activity;protein domain specific binding;receptor binding;transcription cofactor activity;transcription factor binding;transcription factor binding transcription factor activity;unfolded protein binding	aryl hydrocarbon receptor complex;cell part;cytoplasm;cytoplasmic part;cytosol;intracellular organelle part;intracellular part;macromolecular complex;membrane;nuclear part;nucleoplasm;organelle part;plasma membrane;protein complex;receptor complex		FKBP_C	BYSTRYKH_HEMATOPOIESIS_STEM_CELL_AND_BRAIN_QTL_TRANS;CELLULAR_MACROMOLECULE_METABOLIC_PROCESS;CELLULAR_PROTEIN_METABOLIC_PROCESS;CHIARETTI_ACUTE_LYMPHOBLASTIC_LEUKEMIA_ZAP70;chr11q13;CRGAARNNNNCGA_UNKNOWN;CYTOPLASM;CYTOPLASMIC_PART;CYTOSOL;DAIRKEE_TERT_TARGETS_UP;ESTABLISHMENT_OF_LOCALIZATION;ESTABLISHMENT_OF_PROTEIN_LOCALIZATION;GARY_CD5_TARGETS_UP;GCCATNTTG_V$YY1_Q6;GCM_AIP;GCM_FANCC;GCM_HDAC1;…		0.000146177	0.000169492	13	21.0867	20.287	22.1777	21.2381	20.7867	20.7208	20.754	20.9029	4	4	4	4	0.272765	0.534654	0.0976962
O08917	Flot1	FLOT1_MOUSE	Flotillin-1	21.5177	21.608	21.3724	21.2225	21.8244	21.7415	21.6562	21.8342	21.0193	21.2407	21.3045	21.1241	21.2834	21.1879	20.8866	21.5692	+		+			anatomical structure morphogenesis;axon guidance;axonogenesis;biological regulation;cell part morphogenesis;cell projection morphogenesis;cell projection organization;cellular component disassembly;cellular component disassembly at cellular level;cellular component morphogenesis;cellular component organization;cellular component organization at cellular level;cellular component organization or bi…	binding;enzyme binding;protease binding;protein binding	adherens junction;anchoring junction;caveola;cell junction;cell part;cell-substrate adherens junction;cell-substrate junction;centriolar satellite;cytoplasmic membrane-bounded vesicle;cytoplasmic part;cytoplasmic vesicle;cytoskeletal part;endosome;extracellular membrane-bounded organelle;extracellular organelle;extracellular region part;extracellular vesicular exosome;flotillin complex;focal adhe…	Insulin signaling pathway	Band_7	ACEVEDO_LIVER_TUMOR_VS_NORMAL_ADJACENT_TISSUE_UP;ALFANO_MYC_TARGETS;BONOME_OVARIAN_CANCER_SURVIVAL_OPTIMAL_DEBULKING;BROCKE_APOPTOSIS_REVERSED_BY_IL6;BURTON_ADIPOGENESIS_10;BURTON_ADIPOGENESIS_PEAK_AT_0HR;BYSTRYKH_HEMATOPOIESIS_STEM_CELL_QTL_CIS;CAGGTA_V$AREB6_01;CAMP_UP.V1_UP;CASORELLI_ACUTE_PROMYELOCYTIC_LEUKEMIA_DN;CCCNNNNNNAAGWT_UNKNOWN;CHICAS_RB1_TARGETS_CONFLUENT;chr6p21;DITTMER_PTHLH_TARGE…		0.000146177	0.000169492	14	21.2778	21.8205	22.9233	20.5361	21.4302	21.7641	21.1721	21.2318	4	4	4	4	2.61615	0.00672399	1.29987
O08919	Numbl	NUMBL_MOUSE	Numb-like protein	22.5437	22.5297	22.3344	22.3626	22.4105	22.2459	22.0192	22.2328	22.5725	22.7949	22.825	22.6767	22.8147	22.6672	22.6989	23.1906	+		+			adherens junction organization;anatomical structure development;anatomical structure morphogenesis;axonogenesis;biological regulation;cell division;cell junction organization;cell part morphogenesis;cell projection morphogenesis;cell projection organization;cell proliferation;cell surface receptor linked signaling pathway;cell-cell junction organization;cellular component morphogenesis;cellular c…		cell part;cytoplasm;intracellular part	Notch signaling pathway	NumbF;PID	ANATOMICAL_STRUCTURE_DEVELOPMENT;CACTGCC,MIR-34A,MIR-34C,MIR-449;CAGCTG_V$AP4_Q5;CAGGTG_V$E12_Q6;CATTGTYY_V$SOX9_B1;CATTTCA,MIR-203;CHEN_METABOLIC_SYNDROM_NETWORK;chr19q13;CTTTGT_V$LEF1_Q2;GCANCTGNY_V$MYOD_Q6;GGGAGGRR_V$MAZ_Q6;GGGCGGR_V$SP1_Q6;GGGGCCC,MIR-296;GGGTGGRR_V$PAX4_03;GSE15659_TREG_VS_TCONV_DN;GSE17580_UNINFECTED_VS_S_MANSONI_INF_TEFF_DN;GSE17721_0.5H_VS_24H_LPS_BMDM_DN;GSE17721_CTRL_VS…		0.000146177	0.000169492	12	22.4833	22.3724	23.9949	22.5334	22.4426	22.2271	22.7173	22.8428	4	4	4	4	3.07231	0.00383519	1.86428
O08967	Cyth3	CYH3_MOUSE	Cytohesin-3	19.4308	19.3719	19.4256	19.7567	19.4898	19.5712	16.7683	19.3045	19.9569	19.9995	20.2956	19.4391	19.2373	19.3638	18.8323	16.1942	+					biological regulation;cellular process;establishment of cell polarity;establishment of epithelial cell polarity;establishment of localization;establishment of localization in cell;establishment or maintenance of cell polarity;Golgi vesicle transport;intracellular transport;positive regulation of biological process;positive regulation of catalytic activity;positive regulation of cell adhesion;posi…	ARF guanyl-nucleotide exchange factor activity;binding;enzyme regulator activity;GTPase regulator activity;guanyl-nucleotide exchange factor activity;lipid binding;nucleoside-triphosphatase regulator activity;phosphatidylinositol binding;phosphatidylinositol-3,4,5-trisphosphate binding;phospholipid binding;small GTPase regulator activity	cell part;cell projection;cytoplasm;cytoplasmic part;cytosol;extrinsic to internal side of plasma membrane;extrinsic to membrane;extrinsic to plasma membrane;intracellular part;membrane;membrane part;plasma membrane;plasma membrane part;ruffle		PH;Sec7	AACTTT_UNKNOWN;ATACCTC,MIR-202;BASAKI_YBX1_TARGETS_UP;BENPORATH_CYCLING_GENES;BIOCARTA_ARAP_PATHWAY;BRCA1_DN.V1_DN;BURTON_ADIPOGENESIS_9;CAGCTG_V$AP4_Q5;CAGGTG_V$E12_Q6;CCCNNGGGAR_V$OLF1_01;CCTNTMAGA_UNKNOWN;CELL_FRACTION;chr7p22;CREIGHTON_ENDOCRINE_THERAPY_RESISTANCE_2;CTTTGA_V$LEF1_Q2;ENZYME_REGULATOR_ACTIVITY;ESTABLISHMENT_OF_LOCALIZATION;FONTAINE_PAPILLARY_THYROID_CARCINOMA_DN;GCANCTGNY_V$MYO…		0.000146177	0.000169492	3	19.683	19.018	NaN	NaN	19.4962	19.4552	19.9228	19.1444	4	3	4	3	0.690006	0.0449598	1.12394
O08989	Mras	RASM_MOUSE	Ras-related protein M-Ras	21.0473	20.9885	20.9874	16.907	21.0345	20.8621	20.9665	17.0574	20.6255	20.8989	20.9427	21.066	20.9814	21.396	21.3933	21.1013						biological regulation;cellular process;cellular response to stimulus;intracellular signal transduction;regulation of biological process;regulation of cellular process;response to stimulus;signal transduction;small GTPase mediated signal transduction	binding;GTP binding;GTP-dependent protein binding;guanyl nucleotide binding;guanyl ribonucleotide binding;nucleotide binding;protein binding;purine nucleotide binding;purine ribonucleoside triphosphate binding;purine ribonucleotide binding;ribonucleotide binding	cell part;extracellular membrane-bounded organelle;extracellular organelle;extracellular region part;extracellular vesicular exosome;membrane;membrane-bounded organelle;membrane-bounded vesicle;organelle;plasma membrane;vesicle	MAPK signaling pathway;Regulation of actin cytoskeleton;Tight junction	Ras	AAGCCAT,MIR-135A,MIR-135B;ACTIN_CYTOSKELETON_ORGANIZATION_AND_BIOGENESIS;ACTIN_FILAMENT_BASED_PROCESS;ALK_DN.V1_UP;ANATOMICAL_STRUCTURE_DEVELOPMENT;ATF2_S_UP.V1_UP;ATM_DN.V1_DN;BILD_E2F3_ONCOGENIC_SIGNATURE;BLALOCK_ALZHEIMERS_DISEASE_UP;BROWNE_HCMV_INFECTION_18HR_UP;chr3q22;CSR_LATE_UP.V1_UP;CYTOSKELETON_ORGANIZATION_AND_BIOGENESIS;EBAUER_MYOGENIC_TARGETS_OF_PAX3_FOXO1_FUSION;EBAUER_TARGETS_OF_PA…		0.000146177	0.000169492	5	20.5278	NaN	23.6113	20.3628	21.0077	20.9544	20.8833	21.218	3	3	4	4	0.282472	0.213835	0.38169
Q9D0F3	Lman1	LMAN1_MOUSE	Protein ERGIC-53	21.2306	21.3275	21.2476	21.4965	21.2419	21.3791	21.4579	21.3864	21.8258	22.0355	22.11	21.9671	21.8899	21.7161	21.7377	21.3974	+	+				biological regulation;cellular component organization;cellular component organization at cellular level;cellular component organization or biogenesis;cellular component organization or biogenesis at cellular level;cellular process;endoplasmic reticulum organization;ER to Golgi vesicle-mediated transport;establishment of localization;establishment of localization in cell;establishment of protein l…	binding;carbohydrate binding;cation binding;ion binding;metal ion binding	cell part;coated vesicle;contractile fiber part;cytoplasmic membrane-bounded vesicle;cytoplasmic part;cytoplasmic vesicle;endoplasmic reticulum membrane;endoplasmic reticulum part;endoplasmic reticulum-Golgi intermediate compartment;endoplasmic reticulum-Golgi intermediate compartment membrane;ER to Golgi transport vesicle;extracellular membrane-bounded organelle;extracellular organelle;extracell…	Protein processing in endoplasmic reticulum	Lectin_leg-like	BASAKI_YBX1_TARGETS_DN;BLOOD_COAGULATION;BRUINS_UVC_RESPONSE_VIA_TP53_GROUP_A;CARBOHYDRATE_BINDING;CCAATNNSNNNGCG_UNKNOWN;CELLULAR_LOCALIZATION;CELLULAR_MACROMOLECULE_METABOLIC_PROCESS;CELLULAR_PROTEIN_METABOLIC_PROCESS;CHIN_BREAST_CANCER_COPY_NUMBER_DN;chr18q21;COAGULATION;CYTOPLASM;CYTOPLASMIC_PART;DIAZ_CHRONIC_MEYLOGENOUS_LEUKEMIA_UP;DODD_NASOPHARYNGEAL_CARCINOMA_DN;ENDOMEMBRANE_SYSTEM;ENDOPLA…	REACT_333773	0.000146177	0.000169492	12	20.8849	21.1698	22.7229	20.4267	21.3256	21.3663	21.9846	21.6852	4	4	4	4	4.11463	0.00252137	3.59606
Q9D666	Sun1	SUN1_MOUSE	SUN domain-containing protein 1	20.2319	20.3099	20.4056	20.6927	20.4882	20.918	20.5847	20.5253	20.7343	20.4326	20.7272	20.2952	20.2163	20.3392	19.6699	19.2919	+		+			biological regulation;cell cycle process;cellular component organization;cellular component organization at cellular level;cellular component organization or biogenesis;cellular component organization or biogenesis at cellular level;cellular membrane organization;cellular process;chromosome organization;chromosome organization involved in meiosis;cytoskeletal anchoring at nuclear membrane;cytoske…	binding;lamin binding;protein binding	acrosomal membrane;cell part;cytoplasm;cytoplasmic part;cytoplasmic vesicle membrane;cytoplasmic vesicle part;envelope;integral to membrane;integral to nuclear inner membrane;integral to organelle membrane;intracellular membrane-bounded organelle;intracellular organelle;intracellular organelle part;intracellular part;intrinsic to membrane;intrinsic to nuclear inner membrane;intrinsic to organelle…		Sad1_UNC	ACACTGG,MIR-199A,MIR-199B;ACEVEDO_LIVER_CANCER_UP;ACEVEDO_LIVER_TUMOR_VS_NORMAL_ADJACENT_TISSUE_UP;ACTTTAT,MIR-142-5P;AMIT_SERUM_RESPONSE_120_MCF10A;BOYAULT_LIVER_CANCER_SUBCLASS_G12_UP;CHEMNITZ_RESPONSE_TO_PROSTAGLANDIN_E2_DN;chr7p22;DARWICHE_PAPILLOMA_RISK_HIGH_UP;DARWICHE_PAPILLOMA_RISK_LOW_DN;DARWICHE_SKIN_TUMOR_PROMOTER_UP;DARWICHE_SQUAMOUS_CELL_CARCINOMA_UP;DODD_NASOPHARYNGEAL_CARCINOMA_UP;…	REACT_287050;REACT_75800	0.000146177	0.000169492	10	20.652	20.8834	NaN	NaN	20.41	20.629	20.5474	19.8793	4	4	4	4	1.7442	0.0114597	0.40713
O09005	Degs1	DEGS1_MOUSE	Sphingolipid delta(4)-desaturase DES1	22.4077	22.3415	22.1181	22.4075	22.1552	22.2039	21.808	22.1197	22.1772	22.2212	22.149	21.9185	21.8788	21.8101	20.7619	21.7015	+					biological regulation;biosynthetic process;carboxylic acid biosynthetic process;carboxylic acid metabolic process;cellular biosynthetic process;cellular ketone metabolic process;cellular lipid metabolic process;cellular metabolic process;cellular process;ceramide biosynthetic process;ceramide metabolic process;fatty acid biosynthetic process;fatty acid metabolic process;lipid biosynthetic process…	catalytic activity;oxidoreductase activity;oxidoreductase activity, acting on paired donors, with incorporation or reduction of molecular oxygen;sphingolipid delta-4 desaturase activity	cell part;cytoplasmic part;endoplasmic reticulum membrane;endoplasmic reticulum part;integral to membrane;intracellular membrane-bounded organelle;intracellular organelle;intracellular organelle part;intracellular part;intrinsic to membrane;membrane;membrane part;membrane-bounded organelle;mitochondrion;organelle;organelle membrane;organelle part	Sphingolipid metabolism	FA_desaturase;Lipid_DES	ACEVEDO_LIVER_TUMOR_VS_NORMAL_ADJACENT_TISSUE_UP;AIYAR_COBRA1_TARGETS_UP;BENPORATH_MYC_MAX_TARGETS;BIOSYNTHETIC_PROCESS;BLALOCK_ALZHEIMERS_DISEASE_DN;BOYAULT_LIVER_CANCER_SUBCLASS_G2;BROWN_MYELOID_CELL_DEVELOPMENT_UP;BRUINS_UVC_RESPONSE_VIA_TP53_GROUP_A;CARBOXYLIC_ACID_METABOLIC_PROCESS;CELL_FRACTION;CELLULAR_BIOSYNTHETIC_PROCESS;CELLULAR_LIPID_METABOLIC_PROCESS;CHANG_IMMORTALIZED_BY_HPV31_DN;chr…	REACT_335233	0.000146177	0.000169492	3	22.1355	22.9278	NaN	19.0393	22.3187	22.0717	22.1164	21.5381	4	4	4	4	1.80205	0.0107776	1.09325
O09012	Pex5	PEX5_MOUSE	Peroxisomal targeting signal 1 receptor	20.6282	20.3839	20.7201	20.2358	20.3029	20.106	20.3087	20.333	20.6849	20.8121	20.886	20.9018	20.7016	20.7686	20.7471	20.7693	+		+			anatomical structure development;biological regulation;carboxylic acid catabolic process;carboxylic acid metabolic process;catabolic process;cell development;cell differentiation;cell migration;cell motility;cellular catabolic process;cellular component assembly;cellular component assembly at cellular level;cellular component movement;cellular component organization;cellular component organizatio…	binding;enzyme binding;GTPase binding;peptide binding;peroxisome matrix targeting signal-1 binding;peroxisome targeting sequence binding;protein binding;protein C-terminus binding;protein N-terminus binding;signal sequence binding;small GTPase binding	cell part;cytoplasm;cytoplasmic part;cytosol;Golgi apparatus;intracellular;intracellular membrane-bounded organelle;intracellular organelle;intracellular organelle lumen;intracellular organelle part;intracellular part;macromolecular complex;membrane;membrane-bounded organelle;membrane-enclosed lumen;microbody;microbody lumen;microbody membrane;microbody part;mitochondrion;organelle;organelle lume…	Peroxisome	TPR_1	ACOSTA_PROLIFERATION_INDEPENDENT_MYC_TARGETS_UP;ALFANO_MYC_TARGETS;BYSTRYKH_HEMATOPOIESIS_STEM_CELL_QTL_TRANS;CAGTGTT,MIR-141,MIR-200A;chr12p;CTTTAAR_UNKNOWN;CTTTGTA,MIR-524;DOANE_RESPONSE_TO_ANDROGEN_DN;GAL_LEUKEMIC_STEM_CELL_UP;GCCNNNWTAAR_UNKNOWN;GCM_FANCC;GCM_SMARCD1;GGGCGGR_V$SP1_Q6;GOBERT_OLIGODENDROCYTE_DIFFERENTIATION_DN;GSE10856_CTRL_VS_TNFRSF6B_IN_MACROPHAGE_UP;GSE11864_UNTREATED_VS_CSF…		0.000146177	0.000169492	8	20.0092	19.4006	22.1173	21.2415	20.492	20.2627	20.8212	20.7467	4	4	4	4	3.57743	0.00352585	1.45381
O09061	Psmb1	PSB1_MOUSE	Proteasome subunit beta type-1	22.8755	22.4597	22.6632	22.4636	22.7752	22.6627	22.5801	22.5257	22.6266	22.9467	22.9318	23.2318	22.8283	22.9444	23.1883	23.677	+					catabolic process;cellular catabolic process;cellular macromolecule catabolic process;cellular macromolecule metabolic process;cellular metabolic process;cellular process;macromolecule catabolic process;macromolecule metabolic process;metabolic process;modification-dependent macromolecule catabolic process;modification-dependent protein catabolic process;primary metabolic process;proteasomal prot…	catalytic activity;endopeptidase activity;hydrolase activity;peptidase activity;peptidase activity, acting on L-amino acid peptides;threonine-type endopeptidase activity;threonine-type peptidase activity	cell part;cytoplasm;cytoplasmic part;cytosol;extracellular membrane-bounded organelle;extracellular organelle;extracellular region part;extracellular vesicular exosome;intracellular membrane-bounded organelle;intracellular organelle;intracellular part;macromolecular complex;membrane-bounded organelle;membrane-bounded vesicle;nucleus;organelle;proteasome complex;proteasome core complex;protein com…	Proteasome	Proteasome	BENPORATH_MYC_MAX_TARGETS;BENPORATH_MYC_TARGETS_WITH_EBOX;BENPORATH_NANOG_TARGETS;BENPORATH_SOX2_TARGETS;BIOCARTA_PROTEASOME_PATHWAY;chr6q27;COATES_MACROPHAGE_M1_VS_M2_DN;DANG_BOUND_BY_MYC;DANG_MYC_TARGETS_UP;DIAZ_CHRONIC_MEYLOGENOUS_LEUKEMIA_UP;FERNANDEZ_BOUND_BY_MYC;GNF2_DAP3;GNF2_G22P1;GNF2_PPP6C;GRADE_COLON_AND_RECTAL_CANCER_UP;GSE14000_TRANSLATED_RNA_VS_MRNA_4H_LPS_DC_UP;GSE14000_TRANSLATED_…	REACT_274287;REACT_275686;REACT_275732;REACT_278878;REACT_289441;REACT_294625;REACT_297888;REACT_299120;REACT_301078;REACT_308964;REACT_310780;REACT_315933;REACT_321346;REACT_326233;REACT_329431;REACT_334737;REACT_336463;REACT_336745;REACT_337766;REACT_341044;REACT_341075;REACT_342086;REACT_342636;REACT_343561;REACT_343568;REACT_345193;REACT_347264;REACT_351311;REACT_353777;REACT_359269;REACT_359…	0.000146177	0.000169492	7	22.4666	22.4454	23.3437	23.4279	22.6155	22.6359	22.9342	23.1595	4	4	4	4	1.54229	0.0207052	1.04265
O09106	Hdac1	HDAC1_MOUSE	Histone deacetylase 1	20.3589	20.1357	20.1782	20.3799	20.3507	20.5108	20.6712	20.6649	20.383	20.7641	20.7794	20.7449	20.8016	20.6762	20.8368	19.9444		+				anatomical structure development;anatomical structure formation involved in morphogenesis;anatomical structure morphogenesis;ATP-dependent chromatin remodeling;biological regulation;cell differentiation;cellular component organization;cellular component organization at cellular level;cellular component organization or biogenesis;cellular component organization or biogenesis at cellular level;cell…	activating transcription factor binding;binding;catalytic activity;chromatin binding;core promoter binding;deacetylase activity;DNA binding;enzyme binding;histone deacetylase activity;histone deacetylase activity (H3-K14 specific);histone deacetylase activity (H3-K9 specific);histone deacetylase binding;hydrolase activity;hydrolase activity, acting on carbon-nitrogen (but not peptide) bonds;hydro…	cell body;cell part;chromatin;chromatin remodeling complex;chromosomal part;cytoplasm;cytoplasmic part;cytosol;heterochromatin;histone deacetylase complex;intracellular membrane-bounded organelle;intracellular organelle;intracellular organelle part;intracellular part;macromolecular complex;membrane-bounded organelle;neuronal cell body;nuclear chromatin;nuclear chromosome part;nuclear part;nucleop…	Cell cycle;Chronic myeloid leukemia;Huntington's disease;Notch signaling pathway;Pathways in cancer	Hist_deacetyl	ANTI_APOPTOSIS;APOPTOSIS_GO;BIOCARTA_CARM_ER_PATHWAY;BIOCARTA_G1_PATHWAY;BIOCARTA_MEF2D_PATHWAY;BIOCARTA_MTA3_PATHWAY;BIOCARTA_PITX2_PATHWAY;BIOCARTA_VDR_PATHWAY;BIOCARTA_WNT_PATHWAY;BLALOCK_ALZHEIMERS_DISEASE_UP;BLUM_RESPONSE_TO_SALIRASIB_DN;CELL_DEVELOPMENT;chr1p34;CHROMATIN_MODIFICATION;CHROMOSOME_ORGANIZATION_AND_BIOGENESIS;CTTTGTA,MIR-524;CYTOPLASM;DEACETYLASE_ACTIVITY;DIAZ_CHRONIC_MEYLOGENO…	REACT_264471;REACT_274086;REACT_280010;REACT_294694;REACT_325952;REACT_326896;REACT_333804;REACT_334621;REACT_334977;REACT_337844;REACT_350574;REACT_351655	0.000146177	0.000169492	6	20.0796	19.8451	20.8667	21.1588	20.2632	20.5494	20.6678	20.5648	4	4	4	4	0.74568	0.124083	1.92335
O09111	Ndufb11	NDUBB_MOUSE	NADH dehydrogenase [ubiquinone] 1 beta subcomplex subunit 11, mitochondrial	22.6781	23.3374	23.0087	23.0011	23.1145	23.0846	23.0102	23.1916	22.3226	22.8378	22.4075	22.5418	22.7965	22.9139	22.1854	22.3265	+					metabolic process;oxidation-reduction process		cell part;cytoplasmic part;integral to membrane;intracellular membrane-bounded organelle;intracellular organelle;intracellular organelle part;intracellular part;intrinsic to membrane;macromolecular complex;membrane part;membrane-bounded organelle;mitochondrial membrane part;mitochondrial part;mitochondrial respiratory chain complex I;mitochondrion;NADH dehydrogenase complex;organelle;organelle pa…	Alzheimer's disease;Huntington's disease;Oxidative phosphorylation;Parkinson's disease	ESSS	ALONSO_METASTASIS_UP;BLALOCK_ALZHEIMERS_DISEASE_DN;CCCNNGGGAR_V$OLF1_01;chrxp11;DAIRKEE_TERT_TARGETS_UP;DEMAGALHAES_AGING_DN;GATTGGY_V$NFY_Q6_01;GCCATNTTG_V$YY1_Q6;GGGCGGR_V$SP1_Q6;GRADE_COLON_CANCER_UP;GSE11924_TFH_VS_TH2_CD4_TCELL_DN;GSE17721_0.5H_VS_4H_POLYIC_BMDM_UP;GSE17721_0.5H_VS_8H_PAM3CSK4_BMDM_UP;GSE17721_CTRL_VS_CPG_2H_BMDM_UP;GSE17721_CTRL_VS_GARDIQUIMOD_0.5H_BMDM_DN;GSE17721_CTRL_VS_…	REACT_278797	0.000146177	0.000169492	3	22.6041	22.4857	23.1108	21.689	23.0063	23.1002	22.5274	22.5556	4	4	4	4	1.9084	0.0111658	1.4642
O09114	Ptgds	PTGDS_MOUSE	Prostaglandin-H2 D-isomerase	22.4814	22.5288	22.615	22.246	22.5893	22.6308	16.7683	22.6945	21.1291	21.8931	21.7937	21.5814	22.5518	22.0338	21.9772	21.1707		+				behavior;biological regulation;biosynthetic process;carboxylic acid biosynthetic process;carboxylic acid metabolic process;cellular biosynthetic process;cellular ketone metabolic process;cellular lipid metabolic process;cellular metabolic process;cellular process;circadian behavior;circadian rhythm;circadian sleep/wake cycle process;establishment of localization;fatty acid biosynthetic process;fa…	binding;carboxylic acid binding;catalytic activity;fatty acid binding;intramolecular oxidoreductase activity;isomerase activity;isoprenoid binding;lipid binding;monocarboxylic acid binding;prostaglandin-D synthase activity;retinoid binding;transporter activity	cell part;cytoplasmic part;endoplasmic reticulum;extracellular membrane-bounded organelle;extracellular organelle;extracellular region;extracellular region part;extracellular space;extracellular vesicular exosome;Golgi apparatus;intracellular membrane-bounded organelle;intracellular organelle;intracellular organelle part;intracellular part;membrane;membrane-bounded organelle;membrane-bounded vesi…	Arachidonic acid metabolism	Lipocalin	ABE_INNER_EAR;AFFAR_YY1_TARGETS_DN;ATF2_S_UP.V1_UP;BAELDE_DIABETIC_NEPHROPATHY_DN;BEHAVIOR;BIOSYNTHETIC_PROCESS;BOQUEST_STEM_CELL_CULTURED_VS_FRESH_UP;BOQUEST_STEM_CELL_UP;BROWNE_HCMV_INFECTION_14HR_UP;BROWNE_HCMV_INFECTION_2HR_UP;BROWNE_HCMV_INFECTION_6HR_UP;BYSTRYKH_HEMATOPOIESIS_STEM_CELL_QTL_TRANS;CAGCTG_V$AP4_Q5;CARBOXYLIC_ACID_METABOLIC_PROCESS;CASORELLI_ACUTE_PROMYELOCYTIC_LEUKEMIA_UP;CELL…	REACT_349058	0.000146177	0.000169492	3	21.6617	21.6545	NaN	21.4936	22.4678	22.6382	21.5993	21.9334	4	3	4	4	0.173186	0.359567	2.45129
O09117	Sypl1	SYPL1_MOUSE	Synaptophysin-like protein 1	20.5878	21.0635	16.8675	20.4627	19.816	19.8893	21.8348	20.26	20.5167	20.6831	20.9911	20.6157	20.6638	20.6231	20.7787	20.6607							transporter activity	cell part;clathrin-coated vesicle;coated vesicle;cytoplasmic membrane-bounded vesicle;cytoplasmic part;cytoplasmic vesicle;cytoplasmic vesicle membrane;cytoplasmic vesicle part;extracellular membrane-bounded organelle;extracellular organelle;extracellular region part;extracellular vesicular exosome;integral to membrane;integral to organelle membrane;integral to synaptic vesicle membrane;intracell…		MARVEL	ACACTAC,MIR-142-3P;AGCATTA,MIR-155;AGUIRRE_PANCREATIC_CANCER_COPY_NUMBER_UP;BENPORATH_MYC_MAX_TARGETS;BYSTRYKH_HEMATOPOIESIS_STEM_CELL_AND_BRAIN_QTL_TRANS;CAMP_UP.V1_DN;CELL_CELL_SIGNALING;CHIANG_LIVER_CANCER_SUBCLASS_UNANNOTATED_DN;chr7q22;CYCLIN_D1_UP.V1_DN;DANG_BOUND_BY_MYC;ENK_UV_RESPONSE_KERATINOCYTE_DN;FLECHNER_BIOPSY_KIDNEY_TRANSPLANT_OK_VS_DONOR_UP;FLECHNER_BIOPSY_KIDNEY_TRANSPLANT_REJECT…		0.000146177	0.000169492	3	NaN	NaN	NaN	NaN	20.7046	20.45	20.7017	20.6816	3	4	4	4	0.237732	0.284249	0.439129
O09126	Sema4d	SEM4D_MOUSE	Semaphorin-4D	19.7921	19.5557	19.6961	19.7468	20.014	20.0622	20.0681	19.9165	19.8041	20.0675	19.9628	20.016	20.0927	20.0073	19.854	19.6127						biological adhesion;biological regulation;cell adhesion;cell surface receptor linked signaling pathway;cell-cell adhesion;cellular process;cellular response to stimulus;homotypic cell-cell adhesion;leukocyte aggregation;leukocyte cell-cell adhesion;multicellular organismal process;negative regulation of alkaline phosphatase activity;negative regulation of biological process;negative regulation of…	binding;molecular transducer activity;protein binding;receptor activity;receptor binding;semaphorin receptor binding;signal transducer activity;signaling receptor activity;transmembrane signaling receptor activity	cell part;extracellular region part;extracellular space;integral to membrane;integral to plasma membrane;intrinsic to membrane;intrinsic to plasma membrane;membrane;membrane part;plasma membrane part	Axon guidance	PSI;Sema	AMUNDSON_GENOTOXIC_SIGNATURE;ANTI_APOPTOSIS;APOPTOSIS_GO;CAR_MLANA;CAR_TNFRSF25;CELL_DEVELOPMENT;CHEN_METABOLIC_SYNDROM_NETWORK;chr9q22;CTCAGGG,MIR-125B,MIR-125A;DIAZ_CHRONIC_MEYLOGENOUS_LEUKEMIA_UP;DURCHDEWALD_SKIN_CARCINOGENESIS_DN;EIF4E_DN;ENK_UV_RESPONSE_EPIDERMIS_DN;GAZDA_DIAMOND_BLACKFAN_ANEMIA_PROGENITOR_UP;GEORGES_TARGETS_OF_MIR192_AND_MIR215;GNF2_CASP8;GNF2_ITGAL;GNF2_PTPRC;GNF2_SNRK;GOB…	REACT_280605;REACT_295273;REACT_348121	0.000146177	0.000169492	12	19.6796	19.6931	20.4752	NaN	19.6977	20.0152	19.9626	19.8917	4	4	4	4	1.53546	0.0636335	1.86946
O09131	Gsto1	GSTO1_MOUSE	Glutathione S-transferase omega-1	22.9847	22.7727	22.6774	22.9572	23.1822	23.1248	23.2298	23.2185	23.3827	23.5403	23.4729	23.486	23.678	23.3501	23.6662	24.7045	+	+				biological regulation;carboxylic acid metabolic process;catabolic process;cellular catabolic process;cellular ketone metabolic process;cellular metabolic process;cellular process;cellular response to arsenic-containing substance;cellular response to chemical stimulus;cellular response to inorganic substance;cellular response to stimulus;L-ascorbic acid metabolic process;metabolic process;negative…	antioxidant activity;catalytic activity;disulfide oxidoreductase activity;glutathione dehydrogenase (ascorbate) activity;glutathione disulfide oxidoreductase activity;glutathione transferase activity;methylarsonate reductase activity;oxidoreductase activity;oxidoreductase activity, acting on a sulfur group of donors;oxidoreductase activity, acting on a sulfur group of donors, quinone or similar c…	cell part;cytoplasm;cytoplasmic part;cytosol;extracellular membrane-bounded organelle;extracellular organelle;extracellular region part;extracellular vesicular exosome;intracellular part;membrane-bounded organelle;membrane-bounded vesicle;organelle;vesicle	Drug metabolism - cytochrome P450;Glutathione metabolism;Metabolism of xenobiotics by cytochrome P450	GST_C;GST_N_3	ACEVEDO_LIVER_TUMOR_VS_NORMAL_ADJACENT_TISSUE_UP;BENPORATH_MYC_MAX_TARGETS;BERENJENO_TRANSFORMED_BY_RHOA_UP;BLALOCK_ALZHEIMERS_DISEASE_DN;BOYLAN_MULTIPLE_MYELOMA_D_CLUSTER_UP;BOYLAN_MULTIPLE_MYELOMA_D_UP;BROWNE_HCMV_INFECTION_20HR_DN;BURTON_ADIPOGENESIS_2;BURTON_ADIPOGENESIS_PEAK_AT_8HR;chr10q25;COULOUARN_TEMPORAL_TGFB1_SIGNATURE_DN;CREIGHTON_ENDOCRINE_THERAPY_RESISTANCE_4;DANG_BOUND_BY_MYC;DODD_…	REACT_317599	0.000146177	0.000169492	9	22.7909	22.7216	24.7487	24.2199	22.848	23.1888	23.4705	23.8497	4	4	4	4	2.40085	0.0036019	3.60266
O09159	Man2b1	MA2B1_MOUSE	Lysosomal alpha-mannosidase	19.6076	18.6313	16.8675	16.907	18.6364	17.0522	16.7683	19.1568	16.6434	19.0089	19.1693	19.0695	19.2733	18.5934	19.1027	19.8429			+			alcohol metabolic process;behavior;carbohydrate metabolic process;cellular carbohydrate metabolic process;cellular macromolecule metabolic process;cellular metabolic process;cellular process;cellular protein metabolic process;cognition;hexose metabolic process;learning or memory;macromolecule metabolic process;macromolecule modification;mannose metabolic process;metabolic process;monosaccharide m…	alpha-mannosidase activity;binding;carbohydrate binding;catalytic activity;cation binding;hydrolase activity;hydrolase activity, acting on glycosyl bonds;hydrolase activity, hydrolyzing O-glycosyl compounds;ion binding;mannose binding;mannosidase activity;metal ion binding;monosaccharide binding;sugar binding;transition metal ion binding;zinc ion binding	cell part;cytoplasmic part;extracellular membrane-bounded organelle;extracellular organelle;extracellular region part;extracellular vesicular exosome;intracellular membrane-bounded organelle;intracellular organelle;intracellular part;lysosome;lytic vacuole;membrane-bounded organelle;membrane-bounded vesicle;organelle;vacuole;vesicle	Lysosome;Other glycan degradation	Alpha-mann_mid;Glyco_hydro_38;Glyco_hydro_38C	ACEVEDO_LIVER_TUMOR_VS_NORMAL_ADJACENT_TISSUE_UP;BIDUS_METASTASIS_DN;BIOPOLYMER_METABOLIC_PROCESS;BIOPOLYMER_MODIFICATION;BLALOCK_ALZHEIMERS_DISEASE_UP;CAGCTG_V$AP4_Q5;CELLULAR_MACROMOLECULE_METABOLIC_PROCESS;CELLULAR_PROTEIN_METABOLIC_PROCESS;CHEN_METABOLIC_SYNDROM_NETWORK;CHIARADONNA_NEOPLASTIC_TRANSFORMATION_KRAS_DN;DANG_REGULATED_BY_MYC_DN;DIRMEIER_LMP1_RESPONSE_EARLY;GCNP_SHH_UP_EARLY.V1_DN;…		0.000146177	0.000169492	8	NaN	NaN	NaN	20.0961	19.1195	18.8966	19.0826	19.203	2	2	3	4	0.427131	0.115004	0.204548
O09161	Casq2	CASQ2_MOUSE	Calsequestrin-2	21.243	20.7679	21.0614	20.8231	20.1068	20.1077	19.8661	19.8182	21.2531	21.0784	20.8773	20.7029	21.0536	20.9796	20.9016	16.1942				+		actin cytoskeleton organization;actin filament-based process;actomyosin structure organization;biological regulation;calcium-mediated signaling;cardiac muscle contraction;cellular chemical homeostasis;cellular component assembly;cellular component assembly at cellular level;cellular component organization;cellular component organization at cellular level;cellular component organization or biogene…	binding;calcium ion binding;calcium-dependent protein binding;cation binding;ion binding;metal ion binding;protein binding	cell part;contractile fiber part;cytoplasm;cytoplasmic part;endoplasmic reticulum;endoplasmic reticulum lumen;endoplasmic reticulum part;intracellular;intracellular membrane-bounded organelle;intracellular organelle;intracellular organelle lumen;intracellular organelle part;intracellular part;junctional membrane complex;macromolecular complex;membrane-bounded organelle;membrane-enclosed lumen;org…		Calsequestrin	AAAYRNCTG_UNKNOWN;AACTTT_UNKNOWN;ACEVEDO_METHYLATED_IN_LIVER_CANCER_DN;ALK_DN.V1_DN;ANATOMICAL_STRUCTURE_DEVELOPMENT;CHEMELLO_SOLEUS_VS_EDL_MYOFIBERS_UP;chr1p13;CTAWWWATA_V$RSRFC4_Q2;DELYS_THYROID_CANCER_DN;EBAUER_MYOGENIC_TARGETS_OF_PAX3_FOXO1_FUSION;EBAUER_TARGETS_OF_PAX3_FOXO1_FUSION_UP;GGATTA_V$PITX2_Q2;GNF2_MYL2;GNF2_MYL3;GRAESSMANN_APOPTOSIS_BY_DOXORUBICIN_UP;GRAESSMANN_APOPTOSIS_BY_SERUM_D…	REACT_346473	0.000146177	0.000169492	7	21.0557	19.9692	NaN	21.3726	20.9738	19.9747	20.9779	20.9783	4	4	4	3	0.418118	0.115839	0.00840065
Q3U186	Rars2	SYRM_MOUSE	Probable arginine--tRNA ligase, mitochondrial	19.9347	19.9485	16.8675	20.0242	19.4855	17.0522	19.9182	19.7562	20.6355	20.5575	20.8194	19.8644	20.0901	19.2655	19.2743	20.0892						amine metabolic process;amino acid activation;arginyl-tRNA aminoacylation;biosynthetic process;carboxylic acid metabolic process;cellular amine metabolic process;cellular amino acid metabolic process;cellular biosynthetic process;cellular component organization;cellular component organization at cellular level;cellular component organization or biogenesis;cellular component organization or biogen…	adenyl nucleotide binding;adenyl ribonucleotide binding;aminoacyl-tRNA ligase activity;arginine-tRNA ligase activity;ATP binding;binding;catalytic activity;ligase activity;ligase activity, forming aminoacyl-tRNA and related compounds;ligase activity, forming carbon-oxygen bonds;nucleotide binding;purine nucleotide binding;purine ribonucleoside triphosphate binding;purine ribonucleotide binding;ri…	cell part;cytoplasmic part;intracellular membrane-bounded organelle;intracellular organelle;intracellular organelle lumen;intracellular organelle part;intracellular part;membrane-bounded organelle;membrane-enclosed lumen;mitochondrial matrix;mitochondrial part;mitochondrion;organelle;organelle lumen;organelle part	Aminoacyl-tRNA biosynthesis	DALR_1;tRNA-synt_1d	chr6q16;FOSTER_KDM1A_TARGETS_DN;GSE14769_UNSTIM_VS_240MIN_LPS_BMDM_UP;GSE17721_0.5H_VS_12H_POLYIC_BMDM_UP;GSE17721_0.5H_VS_8H_CPG_BMDM_UP;GSE17721_CTRL_VS_LPS_4H_BMDM_UP;GSE17721_CTRL_VS_PAM3CSK4_0.5H_BMDM_DN;GSE17721_CTRL_VS_POLYIC_24H_BMDM_UP;GSE17721_CTRL_VS_POLYIC_8H_BMDM_UP;GSE17721_LPS_VS_CPG_1H_BMDM_UP;GSE17721_PAM3CSK4_VS_CPG_1H_BMDM_UP;GSE17721_PAM3CSK4_VS_GADIQUIMOD_1H_BMDM_UP;GSE17721_…		0.000146177	0.000169492	6	19.4527	19.7966	NaN	18.3002	19.9691	19.72	20.4692	19.6798	3	3	4	4	0.543425	0.0733195	0.786658
O09172	Gclm	GSH0_MOUSE	Glutamate--cysteine ligase regulatory subunit	21.0965	21.2567	20.9	20.9059	20.8482	21.0072	21.6031	21.2044	21.3012	21.5134	21.5847	21.2164	21.3463	21.1341	21.1001	21.4211						amine biosynthetic process;amine metabolic process;apoptotic mitochondrial changes;biological regulation;biosynthetic process;carboxylic acid biosynthetic process;carboxylic acid metabolic process;cellular amine metabolic process;cellular amino acid biosynthetic process;cellular amino acid metabolic process;cellular biosynthetic process;cellular component organization;cellular component organizat…	acid-amino acid ligase activity;binding;catalytic activity;enzyme binding;enzyme regulator activity;glutamate-cysteine ligase activity;glutamate-cysteine ligase catalytic subunit binding;ligase activity;ligase activity, forming carbon-nitrogen bonds;protein binding;protein dimerization activity;protein heterodimerization activity	cell part;cytoplasmic part;glutamate-cysteine ligase complex;intracellular part;macromolecular complex;protein complex	Glutathione metabolism	Aldo_ket_red	ACID_AMINO_ACID_LIGASE_ACTIVITY;AMINE_METABOLIC_PROCESS;AMINO_ACID_AND_DERIVATIVE_METABOLIC_PROCESS;AMINO_ACID_METABOLIC_PROCESS;ANATOMICAL_STRUCTURE_DEVELOPMENT;ANATOMICAL_STRUCTURE_MORPHOGENESIS;BCAT_BILD_ET_AL_DN;BENPORATH_CYCLING_GENES;BERENJENO_TRANSFORMED_BY_RHOA_UP;BHATI_G2M_ARREST_BY_2METHOXYESTRADIOL_UP;BIOSYNTHETIC_PROCESS;BOYAULT_LIVER_CANCER_SUBCLASS_G1_DN;BROWNE_HCMV_INFECTION_14HR_U…	REACT_277860;REACT_319124	0.000146177	0.000169492	8	21.0218	21.1086	21.4607	21.8528	21.0398	21.1657	21.4039	21.2504	4	4	4	4	0.760658	0.144194	1.61351
Q3UX43	Ankrd13c	AN13C_MOUSE	Ankyrin repeat domain-containing protein 13C	16.7211	16.8303	16.8675	16.907	16.7711	19.4161	19.6274	17.0574	20.0254	19.9526	20.2062	19.8796	16.8004	19.325	19.3785	16.1942	+	+				biological regulation;cellular process;maintenance of location;maintenance of location in cell;maintenance of protein localization in endoplasmic reticulum;maintenance of protein localization to organelle;maintenance of protein location;maintenance of protein location in cell;protein retention in ER lumen;regulation of anoikis;regulation of apoptosis;regulation of biological process;regulation of…	binding;protein binding;receptor binding	cell part;cytoplasmic part;endoplasmic reticulum;endoplasmic reticulum membrane;endoplasmic reticulum part;intracellular membrane-bounded organelle;intracellular organelle;intracellular organelle part;intracellular part;membrane;membrane part;membrane-bounded organelle;organelle;organelle membrane;organelle part;perinuclear region of cytoplasm		Ank_2;GPCR_chapero_1	ACACTCC,MIR-122A;AGCACTT,MIR-93,MIR-302A,MIR-302B,MIR-302C,MIR-302D,MIR-372,MIR-373,MIR-520E,MIR-520A,MIR-526B,MIR-520B,MIR-520C,MIR-520D;BENPORATH_EED_TARGETS;CAGCACT,MIR-512-3P;CHESLER_BRAIN_HIGHEST_EXPRESSION;chr1p32;CYTOPLASM;CYTOPLASMIC_PART;ENDOPLASMIC_RETICULUM;GCACTTT,MIR-17-5P,MIR-20A,MIR-106A,MIR-106B,MIR-20B,MIR-519D;GCNP_SHH_UP_EARLY.V1_UP;GSE17721_CPG_VS_GARDIQUIMOD_0.5H_BMDM_DN;GSE1…		0.000146177	0.000169492	2	19.4042	NaN	NaN	NaN	NaN	19.5217	20.0159	19.3518	0	2	4	2	1.88082	0.00324	7.7533
O35075	Vps26c	VP26C_MOUSE	Vacuolar protein sorting-associated protein 26C	19.7103	19.6543	19.427	19.8218	19.758	19.99	16.7683	17.0574	16.6434	19.8076	19.4058	16.6663	16.8004	19.466	18.7632	19.4967		+				establishment of localization;establishment of localization in cell;establishment of protein localization;intracellular protein transport;intracellular transport;protein transport;transport	protein transporter activity;substrate-specific transporter activity;transporter activity	cell part;cytoplasmic part;endosome;intracellular membrane-bounded organelle;intracellular organelle;intracellular part;membrane-bounded organelle;nucleus;organelle		Vps26	BRUINS_UVC_RESPONSE_LATE;CHIARADONNA_NEOPLASTIC_TRANSFORMATION_CDC25_DN;chr21q22;DIAZ_CHRONIC_MEYLOGENOUS_LEUKEMIA_UP;ENK_UV_RESPONSE_KERATINOCYTE_DN;GSE10325_CD4_TCELL_VS_BCELL_UP;GSE11864_UNTREATED_VS_CSF1_IN_MAC_DN;GSE11864_UNTREATED_VS_CSF1_PAM3CYS_IN_MAC_UP;GSE11924_TH1_VS_TH17_CD4_TCELL_DN;GSE11924_TH1_VS_TH2_CD4_TCELL_DN;GSE14308_TH17_VS_INDUCED_TREG_UP;GSE1460_CD4_THYMOCYTE_VS_NAIVE_CD4_T…		0.000146177	0.000169492	4	NaN	NaN	NaN	19.1901	19.6534	19.874	19.6067	19.242	4	2	2	3	0.347483	0.156736	0.8959
O35083	Agpat1	PLCA_MOUSE	1-acyl-sn-glycerol-3-phosphate acyltransferase alpha	21.6817	22.0056	21.8852	22.0862	22.287	22.2402	22.0092	22.2146	22.3186	22.2461	22.397	22.2162	22.426	22.3331	22.3719	22.24	+					acylglycerol biosynthetic process;acylglycerol metabolic process;biological regulation;biosynthetic process;carboxylic acid biosynthetic process;carboxylic acid metabolic process;CDP-diacylglycerol biosynthetic process;CDP-diacylglycerol metabolic process;cellular biosynthetic process;cellular ketone metabolic process;cellular lipid metabolic process;cellular metabolic process;cellular process;di…	1-acylglycerol-3-phosphate O-acyltransferase activity;acylglycerol O-acyltransferase activity;catalytic activity;O-acyltransferase activity;transferase activity;transferase activity, transferring acyl groups;transferase activity, transferring acyl groups other than amino-acyl groups	cell part;cytoplasmic part;endoplasmic reticulum membrane;endoplasmic reticulum part;integral to membrane;intracellular organelle part;intracellular part;intrinsic to membrane;membrane;membrane part;organelle membrane;organelle part	Fat digestion and absorption;Glycerolipid metabolism;Glycerophospholipid metabolism	Acyltransferase	AGGGCCA,MIR-328;BIOSYNTHETIC_PROCESS;BUYTAERT_PHOTODYNAMIC_THERAPY_STRESS_DN;CARBOXYLIC_ACID_METABOLIC_PROCESS;CELLULAR_BIOSYNTHETIC_PROCESS;CELLULAR_LIPID_METABOLIC_PROCESS;chr6p21;CONCANNON_APOPTOSIS_BY_EPOXOMICIN_DN;CTTTAAR_UNKNOWN;CTTTGA_V$LEF1_Q2;CYTOPLASM;CYTOPLASMIC_PART;DELACROIX_RAR_BOUND_ES;DELACROIX_RARG_BOUND_MEF;DEURIG_T_CELL_PROLYMPHOCYTIC_LEUKEMIA_UP;DIAZ_CHRONIC_MEYLOGENOUS_LEUKEM…	REACT_304133;REACT_307833;REACT_333964	0.000146177	0.000169492	7	21.6921	21.7417	NaN	19.5295	21.9147	22.1878	22.2945	22.3427	4	4	4	4	2.85678	0.0112782	2.10982
O35098	Dpysl4	DPYL4_MOUSE	Dihydropyrimidinase-related protein 4	25.7092	25.4499	25.7192	25.3579	25.4841	25.38	25.3918	25.3323	25.8544	25.9241	25.817	25.7927	25.9808	25.9567	25.6432	25.5666	+					cell death;cellular process;death;neuron death	binding;catalytic activity;hydrolase activity;hydrolase activity, acting on carbon-nitrogen (but not peptide) bonds;phosphoprotein binding;protein binding	cell part;cytoplasm;intracellular part		Amidohydro_1	ANATOMICAL_STRUCTURE_DEVELOPMENT;BONOME_OVARIAN_CANCER_SURVIVAL_SUBOPTIMAL_DEBULKING;CACTGCC,MIR-34A,MIR-34C,MIR-449;chr10q25;CTTTGT_V$LEF1_Q2;ELVIDGE_HIF1A_AND_HIF2A_TARGETS_DN;ELVIDGE_HIF1A_TARGETS_DN;ELVIDGE_HYPOXIA_BY_DMOG_UP;ELVIDGE_HYPOXIA_UP;FIGUEROA_AML_METHYLATION_CLUSTER_3_UP;FIGUEROA_AML_METHYLATION_CLUSTER_6_UP;GSE11924_TFH_VS_TH2_CD4_TCELL_DN;GSE1460_INTRATHYMIC_T_PROGENITOR_VS_THYMI…	REACT_314392	0.000146177	0.000169492	30	25.6131	25.3909	24.7577	25.8272	25.559	25.397	25.8471	25.7868	4	4	4	4	2.4779	0.012271	1.62093
O35099	Map3k5	M3K5_MOUSE	Mitogen-activated protein kinase kinase kinase 5	19.8585	19.7062	19.8065	19.8675	19.7643	20.0186	20.0208	19.837	20.2867	20.2189	20.3087	20.1075	20.1695	19.915	19.8493	18.8582		+				activation of caspase activity;activation of MAPK activity;activation of MAPKK activity;activation of protein kinase activity;apoptosis;apoptosis in response to endoplasmic reticulum stress;biological regulation;cell death;cellular macromolecule metabolic process;cellular metabolic process;cellular process;cellular protein metabolic process;cellular response to chemical stimulus;cellular response…	adenyl nucleotide binding;adenyl ribonucleotide binding;apoptotic protease activator activity;ATP binding;binding;caspase activator activity;caspase regulator activity;catalytic activity;cation binding;enzyme activator activity;enzyme binding;enzyme regulator activity;identical protein binding;ion binding;kinase activity;kinase binding;magnesium ion binding;MAP kinase kinase kinase activity;metal…		Amyotrophic lateral sclerosis (ALS);MAPK signaling pathway;Neurotrophin signaling pathway;Protein processing in endoplasmic reticulum	DUF4071;Pkinase	AAAYRNCTG_UNKNOWN;AATGTGA,MIR-23A,MIR-23B;ACTIVATION_OF_JNK_ACTIVITY;ACTIVATION_OF_MAPK_ACTIVITY;ADENYL_NUCLEOTIDE_BINDING;ADENYL_RIBONUCLEOTIDE_BINDING;AGUIRRE_PANCREATIC_CANCER_COPY_NUMBER_DN;APOPTOSIS_GO;ATP_BINDING;BENPORATH_EED_TARGETS;BENPORATH_MYC_MAX_TARGETS;BHAT_ESR1_TARGETS_NOT_VIA_AKT1_DN;BIOCARTA_41BB_PATHWAY;BIOCARTA_HIVNEF_PATHWAY;BIOCARTA_KERATINOCYTE_PATHWAY;BIOCARTA_MAPK_PATHWAY;…	REACT_305463	0.000146177	0.000169492	14	20.1323	19.9141	22.5548	19.496	19.8096	19.9102	20.2305	19.698	4	4	4	4	0.89472	0.0661087	3.44001
O35114	Scarb2	SCRB2_MOUSE	Lysosome membrane protein 2	22.3095	22.6025	21.4808	21.8082	21.7628	22.2137	21.757	22.261	20.9731	21.3298	21.2059	21.2323	21.5272	21.5555	20.947	21.3259	+	+	+			biological adhesion;cell adhesion;cellular process;establishment of localization;establishment of localization in cell;establishment of protein localization;establishment of protein localization to organelle;establishment of protein localization to vacuole;intracellular protein transport;intracellular transport;lysosomal transport;protein targeting;protein targeting to lysosome;protein targeting …	binding;enzyme binding;protein binding;receptor activity	adherens junction;anchoring junction;cell junction;cell part;cell-substrate adherens junction;cell-substrate junction;cytoplasmic part;extracellular membrane-bounded organelle;extracellular organelle;extracellular region part;extracellular vesicular exosome;focal adhesion;integral to membrane;intracellular organelle lumen;intracellular organelle part;intracellular part;intrinsic to membrane;lysos…	Lysosome	CD36	AMIT_EGF_RESPONSE_20_MCF10A;ASTON_MAJOR_DEPRESSIVE_DISORDER_DN;BROWN_MYELOID_CELL_DEVELOPMENT_UP;BRUINS_UVC_RESPONSE_LATE;CELL_FRACTION;chr4q21;COLINA_TARGETS_OF_4EBP1_AND_4EBP2;DAZARD_RESPONSE_TO_UV_SCC_UP;DIAZ_CHRONIC_MEYLOGENOUS_LEUKEMIA_UP;FULCHER_INFLAMMATORY_RESPONSE_LECTIN_VS_LPS_DN;GAUSSMANN_MLL_AF4_FUSION_TARGETS_A_DN;GCM_DFFA;GCM_MAP1B;GCM_MYST2;GCM_NCAM1;GCM_PTPRD;GCM_RBM8A;GCM_SUFU;GC…		0.000146177	0.000169492	7	21.7534	22.461	NaN	19.254	22.0503	21.9986	21.1853	21.3389	4	4	4	4	2.33498	0.00360471	1.78585
O35129	Phb2	PHB2_MOUSE	Prohibitin-2	23.4263	24.0497	23.6364	23.721	23.9475	23.7679	24.0126	23.8725	23.2717	24.1541	23.768	24.1839	24.1982	24.1626	24.0362	23.8661						anatomical structure development;anatomical structure morphogenesis;biological regulation;biosynthetic process;branching involved in mammary gland duct morphogenesis;branching morphogenesis of a tube;cellular biosynthetic process;cellular macromolecule biosynthetic process;cellular macromolecule metabolic process;cellular metabolic process;cellular nitrogen compound metabolic process;cellular pro…		cell part;cell surface;cytoplasmic part;extracellular membrane-bounded organelle;extracellular organelle;extracellular region part;extracellular vesicular exosome;intracellular membrane-bounded organelle;intracellular organelle;intracellular organelle part;intracellular part;macromolecular complex;membrane;membrane-bounded organelle;membrane-bounded vesicle;mitochondrial inner membrane;mitochondr…		Band_7	BENPORATH_MYC_MAX_TARGETS;BERTUCCI_MEDULLARY_VS_DUCTAL_BREAST_CANCER_UP;BIOCARTA_CARM_ER_PATHWAY;BURTON_ADIPOGENESIS_5;CAIRO_HEPATOBLASTOMA_CLASSES_UP;CCAWYNNGAAR_UNKNOWN;CHANDRAN_METASTASIS_TOP50_DN;CHAUHAN_RESPONSE_TO_METHOXYESTRADIOL_DN;chr12p13;CTTTGA_V$LEF1_Q2;CYTOPLASM;CYTOPLASMIC_PART;DANG_BOUND_BY_MYC;DIAZ_CHRONIC_MEYLOGENOUS_LEUKEMIA_UP;ENK_UV_RESPONSE_KERATINOCYTE_UP;ENVELOPE;GCCATNTTG_…		0.000146177	0.000169492	14	22.6699	23.0583	22.1812	22.451	23.7084	23.9001	23.8444	24.0658	4	4	4	4	0.470575	0.256316	0.21822
O35136	Ncam2	NCAM2_MOUSE	Neural cell adhesion molecule 2	22.4058	22.8072	22.7192	23.0075	23.1704	22.9851	23.0274	22.9761	22.9368	22.9247	23.0719	22.7527	22.9872	22.8537	22.7471	24.3008						axonal fasciculation;biological adhesion;cell adhesion;cell recognition;cellular process;multicellular organismal process;neurological system process;neuron recognition;sensory perception;sensory perception of chemical stimulus;sensory perception of smell;system process		anchored to membrane;axon;cell part;cell projection;integral to membrane;intrinsic to membrane;membrane;membrane part;neuron projection;plasma membrane	Cell adhesion molecules (CAMs);Prion diseases	fn3;I-set	AACTTT_UNKNOWN;CAGGTG_V$E12_Q6;CELL_CELL_ADHESION;chr21q21;CREIGHTON_ENDOCRINE_THERAPY_RESISTANCE_5;DEURIG_T_CELL_PROLYMPHOCYTIC_LEUKEMIA_UP;FRASOR_RESPONSE_TO_SERM_OR_FULVESTRANT_UP;GCNP_SHH_UP_EARLY.V1_UP;GGGAGGRR_V$MAZ_Q6;GGGTGGRR_V$PAX4_03;GOBERT_OLIGODENDROCYTE_DIFFERENTIATION_DN;GOZGIT_ESR1_TARGETS_DN;GSE1448_ANTI_VALPHA2_VS_VBETA5_DP_THYMOCYTE_DN;GSE15930_STIM_VS_STIM_AND_TRICHOSTATINA_48H…		0.000146177	0.000169492	23	22.6912	22.9317	26.0177	21.9324	22.7349	23.0398	22.9216	23.2222	4	4	4	4	0.408527	0.227603	0.629696
O35143	ATP5IF1	ATIF1_MOUSE	ATPase inhibitor, mitochondrial	25.6918	25.6729	25.7686	25.8812	25.1689	25.2881	25.1734	24.9819	25.1496	25.2723	25.1117	24.5704	25.3372	25.4838	24.2985	25.3811	+	+				biological regulation;biosynthetic process;cell differentiation;cellular biosynthetic process;cellular chemical homeostasis;cellular component assembly;cellular component organization;cellular component organization or biogenesis;cellular developmental process;cellular homeostasis;cellular ion homeostasis;cellular metabolic process;cellular nitrogen compound biosynthetic process;cellular nitrogen…	angiostatin binding;ATPase binding;ATPase inhibitor activity;ATPase regulator activity;binding;calmodulin binding;enzyme binding;enzyme inhibitor activity;enzyme regulator activity;identical protein binding;nucleoside-triphosphatase regulator activity;protein binding;protein dimerization activity;protein homodimerization activity	cell part;cell surface;cytoplasmic part;intracellular membrane-bounded organelle;intracellular organelle;intracellular organelle part;intracellular part;macromolecular complex;membrane part;membrane-bounded organelle;mitochondrial membrane part;mitochondrial part;mitochondrial proton-transporting ATP synthase complex;mitochondrion;organelle;organelle part;protein complex;proton-transporting ATP s…		IATP	AAAYRNCTG_UNKNOWN;ANATOMICAL_STRUCTURE_DEVELOPMENT;ANATOMICAL_STRUCTURE_FORMATION;ANATOMICAL_STRUCTURE_MORPHOGENESIS;ANGIOGENESIS;AUNG_GASTRIC_CANCER;BENPORATH_NANOG_TARGETS;BLALOCK_ALZHEIMERS_DISEASE_DN;CALMODULIN_BINDING;CASORELLI_ACUTE_PROMYELOCYTIC_LEUKEMIA_DN;CELL_PROLIFERATION_GO_0008283;CELL_SURFACE;CELLULAR_COMPONENT_ASSEMBLY;chr1p35;COLDREN_GEFITINIB_RESISTANCE_DN;CYTOPLASM;CYTOPLASMIC_P…		0.000146177	0.000169492	7	26.2902	25.3293	27.236	25.9723	25.7536	25.1531	25.026	25.1251	4	4	4	4	1.48319	0.0164196	2.37388
O35144	Terf2	TERF2_MOUSE	Telomeric repeat-binding factor 2	20.123	19.8685	19.9757	20.1263	20.1295	20.4872	20.4738	20.4593	20.4871	20.384	20.4188	20.2006	20.1699	20.0351	19.8641	18.5774	+					anatomical structure homeostasis;biological regulation;cell cycle;cellular component organization;cellular component organization at cellular level;cellular component organization or biogenesis;cellular component organization or biogenesis at cellular level;cellular localization;cellular macromolecule localization;cellular macromolecule metabolic process;cellular metabolic process;cellular nitrog…	binding;chromatin binding;DNA binding;double-stranded DNA binding;double-stranded telomeric DNA binding;identical protein binding;nucleic acid binding;protein binding;protein C-terminus binding;protein dimerization activity;protein homodimerization activity;sequence-specific DNA binding;structure-specific DNA binding;telomeric DNA binding	cell part;chromosomal part;chromosome, telomeric region;cytoplasm;cytoplasmic part;germ cell nucleus;Golgi apparatus;intracellular membrane-bounded organelle;intracellular organelle;intracellular organelle part;intracellular part;macromolecular complex;male germ cell nucleus;membrane-bounded organelle;nuclear chromosome part;nuclear chromosome, telomeric region;nuclear part;nuclear telomere cap c…		Myb_DNA-binding;TRF	ACEVEDO_LIVER_TUMOR_VS_NORMAL_ADJACENT_TISSUE_UP;BIOPOLYMER_METABOLIC_PROCESS;BOCHKIS_FOXA2_TARGETS;BROWNE_HCMV_INFECTION_1HR_DN;BYSTRYKH_HEMATOPOIESIS_STEM_CELL_QTL_TRANS;CAGGTG_V$E12_Q6;chr16q22;CHROMOSOMAL_PART;CHROMOSOME;CHROMOSOME_ORGANIZATION_AND_BIOGENESIS;DACOSTA_UV_RESPONSE_VIA_ERCC3_UP;DACOSTA_UV_RESPONSE_VIA_ERCC3_XPCS_UP;DNA_BINDING;DNA_METABOLIC_PROCESS;DNA_REPLICATION;GGGAGGRR_V$MAZ…	REACT_287050;REACT_316610;REACT_330509;REACT_75800	0.000146177	0.000169492	10	20.0918	20.1241	NaN	18.4407	20.0234	20.3874	20.3726	19.6617	4	4	4	4	1.192	0.0243345	2.14498
O35166	Gosr2	GOSR2_MOUSE	Golgi SNAP receptor complex member 2	20.6511	20.7048	20.5756	20.8252	20.7964	20.8878	20.8397	21.0269	20.6932	21.1669	21.081	21.0544	20.8806	20.94	20.7487	20.7733						cellular component organization;cellular component organization at cellular level;cellular component organization or biogenesis;cellular component organization or biogenesis at cellular level;cellular membrane fusion;cellular membrane organization;cellular process;endosome transport;ER to Golgi vesicle-mediated transport;establishment of localization;establishment of localization in cell;establis…	binding;protein binding;SNAP receptor activity;SNARE binding	cell part;coated vesicle membrane;cytoplasmic part;cytoplasmic vesicle membrane;cytoplasmic vesicle part;endoplasmic reticulum membrane;endoplasmic reticulum part;endosomal part;endosome membrane;ER to Golgi transport vesicle membrane;Golgi apparatus;Golgi apparatus part;Golgi membrane;integral to membrane;intracellular membrane-bounded organelle;intracellular organelle;intracellular organelle pa…	SNARE interactions in vesicular transport		ACTGTGA,MIR-27A,MIR-27B;AGUIRRE_PANCREATIC_CANCER_COPY_NUMBER_DN;BLALOCK_ALZHEIMERS_DISEASE_INCIPIENT_UP;BLALOCK_ALZHEIMERS_DISEASE_UP;BLUM_RESPONSE_TO_SALIRASIB_UP;BONOME_OVARIAN_CANCER_SURVIVAL_SUBOPTIMAL_DEBULKING;BROWNE_HCMV_INFECTION_18HR_UP;BROWNE_HCMV_INFECTION_20HR_UP;BROWNE_HCMV_INFECTION_6HR_DN;BYSTRYKH_HEMATOPOIESIS_STEM_CELL_QTL_TRANS;CAGTATT,MIR-200B,MIR-200C,MIR-429;CELLULAR_LOCALIZ…		0.000146177	0.000169492	4	20.3719	20.5167	NaN	19.9066	20.6892	20.8877	20.9989	20.8356	4	4	4	4	1.34435	0.0891008	1.41648
O35206	Col15a1	COFA1_MOUSE	Collagen alpha-1(XV) chain	19.6409	19.7245	19.5754	19.5428	19.8979	19.9678	19.8696	20.0152	19.5005	19.512	19.3378	19.4723	19.123	19.5438	19.242	19.3529	+		+			biological adhesion;cell adhesion;cellular process	structural molecule activity	basement membrane;collagen;extracellular matrix part;extracellular membrane-bounded organelle;extracellular organelle;extracellular region part;extracellular space;extracellular vesicular exosome;membrane-bounded organelle;membrane-bounded vesicle;organelle;vesicle	Protein digestion and absorption	Collagen;Endostatin	ACCAAAG,MIR-9;AFFAR_YY1_TARGETS_DN;AMBROSINI_FLAVOPIRIDOL_TREATMENT_TP53;ATACCTC,MIR-202;ATF2_S_UP.V1_DN;BONOME_OVARIAN_CANCER_SURVIVAL_SUBOPTIMAL_DEBULKING;BOQUEST_STEM_CELL_CULTURED_VS_FRESH_UP;BURTON_ADIPOGENESIS_6;CAIRO_HEPATOBLASTOMA_UP;CATGTAA,MIR-496;CHICAS_RB1_TARGETS_CONFLUENT;chr9q21;COLLAGEN;CTTTGA_V$LEF1_Q2;CTTTGT_V$LEF1_Q2;DODD_NASOPHARYNGEAL_CARCINOMA_DN;EXTRACELLULAR_MATRIX;EXTRACE…	REACT_285754;REACT_313067;REACT_318656	0.000146177	0.000169492	5	19.7696	20.1396	NaN	19.4859	19.6209	19.9376	19.4556	19.3154	4	4	4	4	4.56455	0.00261475	1.56955
O35215	Ddt	DOPD_MOUSE	D-dopachrome decarboxylase	25.5528	25.2173	25.2183	25.1566	24.9891	25.2475	25.3385	25.6491	24.5696	24.9839	24.7626	25.2432	25.2549	25.1347	24.6338	24.5481	+					biosynthetic process;cellular biosynthetic process;cellular metabolic process;cellular process;melanin biosynthetic process;melanin metabolic process;metabolic process;pigment biosynthetic process;pigment metabolic process;secondary metabolic process	carbon-carbon lyase activity;carboxy-lyase activity;catalytic activity;D-dopachrome decarboxylase activity;lyase activity	cell part;cytoplasm;extracellular membrane-bounded organelle;extracellular organelle;extracellular region part;extracellular vesicular exosome;intracellular part;membrane-bounded organelle;membrane-bounded vesicle;organelle;vesicle		MIF	AGUIRRE_PANCREATIC_CANCER_COPY_NUMBER_UP;BLALOCK_ALZHEIMERS_DISEASE_DN;BORCZUK_MALIGNANT_MESOTHELIOMA_DN;BROWNE_HCMV_INFECTION_18HR_DN;BURTON_ADIPOGENESIS_6;CAIRO_HEPATOBLASTOMA_DN;CHEN_HOXA5_TARGETS_9HR_DN;CHEN_METABOLIC_SYNDROM_NETWORK;chr22q11;ENK_UV_RESPONSE_KERATINOCYTE_UP;FLECHNER_BIOPSY_KIDNEY_TRANSPLANT_REJECTED_VS_OK_DN;GRUETZMANN_PANCREATIC_CANCER_DN;GSE11924_TH2_VS_TH17_CD4_TCELL_DN;GS…		0.000146177	0.000169492	7	24.7781	24.969	25.3041	25.2095	25.2862	25.3061	24.8898	24.8929	4	4	4	4	1.05815	0.048556	1.22706
O35218	Cpsf2	CPSF2_MOUSE	Cleavage and polyadenylation specificity factor subunit 2	20.0915	19.8108	19.8449	19.9668	20.0271	20.1673	19.8849	20.0766	20.2197	20.0873	20.3873	20.187	20.0433	19.9486	20.3363	19.0709						cellular macromolecule metabolic process;cellular metabolic process;cellular nitrogen compound metabolic process;cellular process;histone mRNA 3'-end processing;histone mRNA metabolic process;macromolecule metabolic process;metabolic process;mRNA 3'-end processing;mRNA cleavage;mRNA metabolic process;mRNA polyadenylation;mRNA processing;nitrogen compound metabolic process;nucleic acid metabolic p…	binding;nucleic acid binding;RNA binding	cell part;intracellular organelle part;intracellular part;macromolecular complex;membrane;mRNA cleavage and polyadenylation specificity factor complex;mRNA cleavage factor complex;nuclear part;nucleoplasm part;organelle part;protein complex	mRNA surveillance pathway	Beta-Casp;CPSF100_C;Lactamase_B;RMMBL	BOYLAN_MULTIPLE_MYELOMA_C_D_UP;BYSTRYKH_HEMATOPOIESIS_STEM_CELL_AND_BRAIN_QTL_CIS;BYSTRYKH_HEMATOPOIESIS_STEM_CELL_QTL_CIS;CCAGGGG,MIR-331;CHESLER_BRAIN_HIGHEST_GENETIC_VARIANCE;CHESLER_BRAIN_QTL_CIS;chr14q31;GCCATNTTG_V$YY1_Q6;GGGNRMNNYCAT_UNKNOWN;GOLDRATH_HOMEOSTATIC_PROLIFERATION;GSE11864_UNTREATED_VS_CSF1_IFNG_IN_MAC_DN;GSE11864_UNTREATED_VS_CSF1_PAM3CYS_IN_MAC_DN;GSE14000_TRANSLATED_RNA_VS_M…	REACT_291263;REACT_305017;REACT_307866;REACT_328741;REACT_351784	0.000146177	0.000169492	12	20.1444	19.779	NaN	20.4689	19.9285	20.039	20.2203	19.8498	4	4	4	4	0.455927	0.246024	1.76847
Q9CZ04	Cops7a	CSN7A_MOUSE	COP9 signalosome complex subunit 7a	21.1393	21.4595	20.9917	20.9134	21.1024	20.7535	21.3749	21.2688	20.0592	20.9673	20.6906	21.097	21.0551	21.3386	21.3813	21.6694	+					cellular macromolecule metabolic process;cellular metabolic process;cellular process;cellular protein metabolic process;cullin deneddylation;macromolecule metabolic process;macromolecule modification;metabolic process;primary metabolic process;protein deneddylation;protein metabolic process;protein modification by small protein conjugation or removal;protein modification by small protein removal;…		cell part;cytoplasm;intracellular organelle part;intracellular part;macromolecular complex;nuclear part;nucleoplasm;organelle part;protein complex;signalosome		PCI	ACACTAC,MIR-142-3P;BAKKER_FOXO3_TARGETS_DN;BENPORATH_SOX2_TARGETS;BLALOCK_ALZHEIMERS_DISEASE_DN;CACGTG_V$MYC_Q2;CCCAGAG,MIR-326;chr12p13;GCM_DDX11;GCM_SMO;GCM_USP6;GEORGES_TARGETS_OF_MIR192_AND_MIR215;GGGAGGRR_V$MAZ_Q6;GRADE_COLON_CANCER_UP;GRAESSMANN_APOPTOSIS_BY_DOXORUBICIN_DN;GRAESSMANN_RESPONSE_TO_MC_AND_DOXORUBICIN_DN;GSE12845_PRE_GC_VS_DARKZONE_GC_TONSIL_BCELL_DN;GSE14308_TH2_VS_NATURAL_TRE…		0.000146177	0.000169492	6	20.6322	20.5686	22.9266	20.1806	21.126	21.1249	20.7036	21.3611	4	4	4	4	1.11596	0.0358658	0.806792
O35239	Ptpn9	PTN9_MOUSE	Tyrosine-protein phosphatase non-receptor type 9	20.9404	21.0075	20.5973	21.0222	21.21	20.9328	20.8061	17.0574	20.9453	21.3691	21.3234	21.5707	21.1861	21.1285	20.907	21.4498						cellular macromolecule metabolic process;cellular metabolic process;cellular process;cellular protein metabolic process;dephosphorylation;macromolecule metabolic process;macromolecule modification;metabolic process;peptidyl-tyrosine dephosphorylation;phosphate-containing compound metabolic process;phosphorus metabolic process;primary metabolic process;protein dephosphorylation;protein metabolic p…	catalytic activity;hydrolase activity;hydrolase activity, acting on ester bonds;phosphatase activity;phosphoprotein phosphatase activity;phosphoric ester hydrolase activity;protein tyrosine phosphatase activity	cell part;cytoplasm;intracellular part		CRAL_TRIO;Y_phosphatase	ACACTGG,MIR-199A,MIR-199B;ACTGTGA,MIR-27A,MIR-27B;AGGGCCA,MIR-328;ATACTGT,MIR-144;BENPORATH_CYCLING_GENES;BIOPOLYMER_METABOLIC_PROCESS;BIOPOLYMER_MODIFICATION;BROWN_MYELOID_CELL_DEVELOPMENT_DN;CACGTTT,MIR-302A;CACTGTG,MIR-128A,MIR-128B;CELLULAR_MACROMOLECULE_METABOLIC_PROCESS;CELLULAR_PROTEIN_METABOLIC_PROCESS;chr15q23;CTGAGCC,MIR-24;DACOSTA_UV_RESPONSE_VIA_ERCC3_DN;DEPHOSPHORYLATION;GGCAGCT,MIR-…		0.000146177	0.000169492	11	20.3558	20.6073	NaN	19.4416	20.8919	20.983	21.3022	21.1678	4	3	4	4	0.51852	0.0829304	1.33074
O35250	Exoc7	EXOC7_MOUSE	Exocyst complex component 7	21.1813	21.0655	21.1519	21.2923	21.0495	21.1507	21.0349	21.014	21.1704	21.097	21.1112	21.1448	21.0578	20.9225	20.8727	21.1115						cellular process;establishment of localization;establishment of localization in cell;establishment of protein localization;exocytosis;protein transport;secretion;secretion by cell;transport;vesicle-mediated transport		cell cortex part;cell part;cell projection part;centriolar satellite;cytoplasmic part;cytoskeletal part;cytosol;exocyst;growth cone membrane;intracellular organelle part;intracellular part;macromolecular complex;membrane;membrane part;microtubule organizing center;microtubule organizing center part;organelle part;plasma membrane;plasma membrane part;protein complex	Insulin signaling pathway	Exo70	BONOME_OVARIAN_CANCER_SURVIVAL_SUBOPTIMAL_DEBULKING;CCAGGGG,MIR-331;chr17q25;COULOUARN_TEMPORAL_TGFB1_SIGNATURE_UP;GCCATNTTG_V$YY1_Q6;GGGYGTGNY_UNKNOWN;GOTZMANN_EPITHELIAL_TO_MESENCHYMAL_TRANSITION_DN;GSE11924_TFH_VS_TH2_CD4_TCELL_UP;GSE11924_TH1_VS_TH2_CD4_TCELL_UP;GSE15659_CD45RA_NEG_CD4_TCELL_VS_NONSUPPRESSIVE_TCELL_UP;GSE15659_NAIVE_CD4_TCELL_VS_RESTING_TREG_UP;GSE15659_NAIVE_VS_PTPRC_NEG_CD4…	REACT_298481;REACT_302653;REACT_358790	0.000146177	0.000169492	13	20.924	20.74	23.1181	20.419	21.1728	21.0623	21.1308	20.9911	4	4	4	4	1.42867	0.22283	0.365642
O35286	Dhx15	DHX15_MOUSE	Pre-mRNA-splicing factor ATP-dependent RNA helicase DHX15	23.1759	23.2362	23.2813	23.2503	23.305	23.2376	23.5073	23.1207	23.4669	23.5069	23.5383	23.4897	23.5383	23.3611	23.3977	22.0899						cellular macromolecule metabolic process;cellular metabolic process;cellular nitrogen compound metabolic process;cellular process;macromolecule metabolic process;metabolic process;mRNA metabolic process;mRNA processing;nitrogen compound metabolic process;nuclear mRNA splicing, via spliceosome;nucleic acid metabolic process;nucleobase-containing compound metabolic process;primary metabolic process…	adenyl nucleotide binding;adenyl ribonucleotide binding;ATP binding;ATPase activity;ATPase activity, coupled;ATP-dependent helicase activity;ATP-dependent RNA helicase activity;binding;catalytic activity;double-stranded RNA binding;helicase activity;hydrolase activity;hydrolase activity, acting on acid anhydrides;hydrolase activity, acting on acid anhydrides, in phosphorus-containing anhydrides;n…	cell part;cytoplasm;intracellular membrane-bounded organelle;intracellular non-membrane-bounded organelle;intracellular organelle;intracellular organelle part;intracellular part;macromolecular complex;membrane-bounded organelle;non-membrane-bounded organelle;nuclear part;nucleolus;nucleoplasm;nucleus;organelle;organelle part;post-mRNA release spliceosomal complex;ribonucleoprotein complex;spliceo…	Spliceosome	DEAD;HA2;Helicase_C;OB_NTP_bind	AATGTGA,MIR-23A,MIR-23B;ACAACTT,MIR-382;ACATTCC,MIR-1,MIR-206;ACEVEDO_LIVER_CANCER_UP;ACTGTAG,MIR-139;AGGCACT,MIR-515-3P;BIOPOLYMER_METABOLIC_PROCESS;BLUM_RESPONSE_TO_SALIRASIB_DN;BOYAULT_LIVER_CANCER_SUBCLASS_G3_UP;CAGCTTT,MIR-320;CASORELLI_ACUTE_PROMYELOCYTIC_LEUKEMIA_DN;chr4p15;DACOSTA_UV_RESPONSE_VIA_ERCC3_COMMON_DN;DACOSTA_UV_RESPONSE_VIA_ERCC3_DN;DAIRKEE_CANCER_PRONE_RESPONSE_BPA;DIAZ_CHRON…		0.000146177	0.000169492	28	23.0378	22.8485	23.0804	22.5502	23.2359	23.2927	23.5004	23.0967	4	4	4	4	0.339074	0.309127	4.21041
O35295	Purb	PURB_MOUSE	Transcriptional activator protein Pur-beta	25.7775	25.6545	25.9099	25.6011	25.4533	25.3356	25.5146	25.4649	26.3348	26.6613	26.5646	26.6559	26.5948	26.3763	26.7263	25.6368	+	+	+			apoptosis;biological regulation;cell death;cell differentiation;cell proliferation;cellular developmental process;cellular macromolecule metabolic process;cellular metabolic process;cellular nitrogen compound metabolic process;cellular process;death;developmental process;DNA conformation change;DNA duplex unwinding;DNA geometric change;DNA metabolic process;DNA unwinding involved in replication;m…	binding;DNA binding;double-stranded DNA binding;double-stranded telomeric DNA binding;mRNA binding;nucleic acid binding;nucleic acid binding transcription factor activity;protein binding;regulatory region DNA binding;regulatory region nucleic acid binding;RNA binding;RNA polymerase II regulatory region DNA binding;RNA polymerase II regulatory region sequence-specific DNA binding;sequence-specific…	cell part;chromosomal part;DNA replication factor A complex;intracellular membrane-bounded organelle;intracellular organelle;intracellular organelle part;intracellular part;macromolecular complex;membrane-bounded organelle;nuclear chromosome part;nuclear part;nucleoplasm;nucleus;organelle;organelle part;protein complex		PurA	AACTGAC,MIR-223;AAGCACA,MIR-218;AAGCACT,MIR-520F;AATGGAG,MIR-136;ACACTAC,MIR-142-3P;ACAGGGT,MIR-10A,MIR-10B;ACCAATC,MIR-509;ACTGCCT,MIR-34B;AGCACTT,MIR-93,MIR-302A,MIR-302B,MIR-302C,MIR-302D,MIR-372,MIR-373,MIR-520E,MIR-520A,MIR-526B,MIR-520B,MIR-520C,MIR-520D;AGGTGCA,MIR-500;ATAAGCT,MIR-21;ATGCTGC,MIR-103,MIR-107;ATGTTTC,MIR-494;ATTCTTT,MIR-186;BENPORATH_PROLIFERATION;BHATI_G2M_ARREST_BY_2METHOX…		0.000146177	0.000169492	9	25.7907	25.2123	27.2927	27.1785	25.7357	25.4421	26.5541	26.3336	4	4	4	4	3.63066	0.00132468	3.67937
O35326	Srsf5	SRSF5_MOUSE	Serine/arginine-rich splicing factor 5	24.3925	23.9002	23.4738	24.0124	24.0088	24.2434	24.0968	24.2003	24.1872	24.3158	24.1201	24.1169	24.1678	23.9853	23.6489	23.2368						biological regulation;biosynthetic process;cellular biosynthetic process;cellular macromolecule biosynthetic process;cellular macromolecule metabolic process;cellular metabolic process;cellular nitrogen compound metabolic process;cellular process;macromolecule biosynthetic process;macromolecule metabolic process;metabolic process;mRNA metabolic process;mRNA processing;nitrogen compound metabolic …	binding;nucleotide binding;protein binding;protein domain specific binding;RS domain binding	cell part;cytoplasm;intracellular non-membrane-bounded organelle;intracellular organelle;intracellular organelle part;intracellular part;non-membrane-bounded organelle;nuclear body;nuclear part;nuclear speck;nucleolus;nucleoplasm part;organelle;organelle part	Spliceosome	RRM_1	AAGCAAT,MIR-137;ACEVEDO_LIVER_CANCER_DN;AGCTCCT,MIR-28;AGGAGTG,MIR-483;AGTCAGC,MIR-345;ATGAAGG,MIR-205;ATGTTAA,MIR-302C;BENPORATH_CYCLING_GENES;BENPORATH_MYC_MAX_TARGETS;BIOPOLYMER_METABOLIC_PROCESS;BLALOCK_ALZHEIMERS_DISEASE_DN;CAFFAREL_RESPONSE_TO_THC_24HR_3_UP;CELLULAR_COMPONENT_ASSEMBLY;chr14q24;CTCTAGA,MIR-526C,MIR-518F,MIR-526A;CTTTGA_V$LEF1_Q2;CTTTGTA,MIR-524;DANG_BOUND_BY_MYC;DEURIG_T_CEL…	REACT_291263;REACT_307866;REACT_321120;REACT_351784	0.000146177	0.000169492	4	23.8189	23.7628	20.2947	24.9251	23.9447	24.1373	24.185	23.7597	4	4	4	4	0.711164	0.114472	0.57961
P61027	Rab10	RAB10_MOUSE	Ras-related protein Rab-10	24.5064	24.8415	24.5649	24.5476	24.5572	24.2812	24.7726	24.4764	24.8418	24.6722	24.6494	24.7984	24.8672	24.841	24.9378	25.1394	+					anatomical structure morphogenesis;antigen processing and presentation;axonogenesis;biological regulation;cell differentiation;cell part morphogenesis;cell projection morphogenesis;cell projection organization;cellular component morphogenesis;cellular component organization;cellular component organization at cellular level;cellular component organization or biogenesis;cellular component organizat…	binding;catalytic activity;cytoskeletal protein binding;GDP binding;GTP binding;GTPase activity;guanyl nucleotide binding;guanyl ribonucleotide binding;hydrolase activity;hydrolase activity, acting on acid anhydrides;hydrolase activity, acting on acid anhydrides, in phosphorus-containing anhydrides;myosin binding;myosin V binding;nucleoside-triphosphatase activity;nucleotide binding;protein bindi…	adherens junction;anchoring junction;cell junction;cell part;cell projection;cell-substrate adherens junction;cell-substrate junction;cilium;cytoplasmic membrane-bounded vesicle;cytoplasmic part;cytoplasmic vesicle;cytoplasmic vesicle membrane;cytoplasmic vesicle part;endocytic vesicle membrane;endoplasmic reticulum membrane;endoplasmic reticulum part;endoplasmic reticulum tubular network;endosom…		Ras	AAAGGGA,MIR-204,MIR-211;AAANWWTGC_UNKNOWN;ABDELMOHSEN_ELAVL4_TARGETS;ACACTGG,MIR-199A,MIR-199B;ACTGAAA,MIR-30A-3P,MIR-30E-3P;ACTGCCT,MIR-34B;AGGAGTG,MIR-483;ATGCTGC,MIR-103,MIR-107;BRUINS_UVC_RESPONSE_LATE;BYSTROEM_CORRELATED_WITH_IL5_DN;CATTTCA,MIR-203;CCATCCA,MIR-432;CCCNNGGGAR_V$OLF1_01;chr2p24;COATES_MACROPHAGE_M1_VS_M2_UP;CTTTGT_V$LEF1_Q2;DANG_REGULATED_BY_MYC_DN;DELACROIX_RAR_BOUND_ES;FORTS…	REACT_302653	0.000146177	0.000169492	10	24.064	24.3637	27.3608	23.6104	24.6151	24.5218	24.7405	24.9463	4	4	4	4	1.97991	0.0236989	0.673401
O35344	Kpna3	IMA4_MOUSE	Importin subunit alpha-4	20.8907	20.861	20.7442	20.3794	20.3445	20.4393	20.3555	20.4758	20.3125	20.6871	20.7387	20.7458	20.5589	21.0213	20.8573	21.0768	+		+			establishment of localization;establishment of localization in cell;establishment of protein localization;intracellular protein transport;intracellular transport;nuclear import;nuclear transport;nucleocytoplasmic transport;protein import;protein import into nucleus;protein targeting;protein transport;transport	binding;protein binding;protein C-terminus binding;protein transporter activity;substrate-specific transporter activity;transporter activity	cell part;cytoplasm;intracellular membrane-bounded organelle;intracellular organelle;intracellular part;membrane-bounded organelle;nucleus;organelle		Arm;IBB	AACTGAC,MIR-223;AAGCCAT,MIR-135A,MIR-135B;AAGGGAT,MIR-188;ACEVEDO_LIVER_CANCER_UP;ACTGCAG,MIR-17-3P;ACTGTGA,MIR-27A,MIR-27B;AGGTGCA,MIR-500;AGTCTTA,MIR-499;ATATGCA,MIR-448;BENPORATH_MYC_MAX_TARGETS;BENPORATH_NANOG_TARGETS;BENPORATH_SOX2_TARGETS;BLALOCK_ALZHEIMERS_DISEASE_DN;BONCI_TARGETS_OF_MIR15A_AND_MIR16_1;BRUINS_UVC_RESPONSE_EARLY_LATE;BYSTROEM_CORRELATED_WITH_IL5_DN;CAATGCA,MIR-33;CACTTTG,MI…		0.000146177	0.000169492	5	20.6439	20.151	NaN	20.6007	20.7188	20.4038	20.621	20.8786	4	4	4	4	1.47175	0.0347287	0.255261
O35345	Kpna6	IMA7_MOUSE	Importin subunit alpha-7	20.7341	20.6085	20.2652	20.2995	20.4843	20.5257	21.2235	20.6253	20.9511	21.1236	21.351	21.1949	21.4254	20.9413	21.1002	21.5264	+	+				biological regulation;establishment of localization;establishment of localization in cell;establishment of protein localization;intracellular protein transport;intracellular transport;maternal process involved in female pregnancy;multicellular organismal process;multicellular organismal reproductive process;nuclear import;nuclear transport;nucleocytoplasmic transport;positive regulation of biolog…	protein transporter activity;substrate-specific transporter activity;transporter activity	cell part;cytoplasm;intracellular membrane-bounded organelle;intracellular organelle;intracellular part;membrane;membrane-bounded organelle;nucleus;organelle		Arm;IBB	AACTTT_UNKNOWN;ACAWNRNSRCGG_UNKNOWN;ACCTGTTG_UNKNOWN;ATGGYGGA_UNKNOWN;BLALOCK_ALZHEIMERS_DISEASE_UP;BOSCO_ALLERGEN_INDUCED_TH2_ASSOCIATED_MODULE;BROWNE_HCMV_INFECTION_16HR_UP;BROWNE_HCMV_INFECTION_20HR_UP;CCANNAGRKGGC_UNKNOWN;CCCNNNNNNAAGWT_UNKNOWN;CELLULAR_LOCALIZATION;chr1p35;CTTTAAR_UNKNOWN;DOUGLAS_BMI1_TARGETS_DN;ENK_UV_RESPONSE_EPIDERMIS_UP;ESTABLISHMENT_OF_CELLULAR_LOCALIZATION;ESTABLISHMEN…		0.000146177	0.000169492	8	20.2027	19.9808	23.4934	21.4632	20.4768	20.7147	21.1551	21.2483	4	4	4	4	2.42108	0.00421969	2.511
O35350	Capn1	CAN1_MOUSE	Calpain-1 catalytic subunit	21.2438	21.6334	21.337	21.4563	21.6165	21.7703	21.5189	21.8851	20.7019	21.1555	20.8739	21.3143	21.0092	21.34	20.9013	20.5091	+		+			catabolic process;cellular catabolic process;cellular macromolecule metabolic process;cellular metabolic process;cellular process;macromolecule catabolic process;macromolecule metabolic process;mammary gland involution;metabolic process;multicellular organismal process;primary metabolic process;protein metabolic process;proteolysis;receptor catabolic process;receptor metabolic process;tissue remo…	binding;calcium ion binding;calcium-dependent cysteine-type endopeptidase activity;catalytic activity;cation binding;cysteine-type endopeptidase activity;cysteine-type peptidase activity;endopeptidase activity;hydrolase activity;ion binding;metal ion binding;peptidase activity;peptidase activity, acting on L-amino acid peptides	adherens junction;anchoring junction;cell junction;cell part;cell-substrate adherens junction;cell-substrate junction;cytoplasm;cytoplasmic part;cytosol;extracellular membrane-bounded organelle;extracellular organelle;extracellular region part;extracellular vesicular exosome;focal adhesion;intracellular membrane-bounded organelle;intracellular organelle;intracellular part;lysosome;lytic vacuole;m…	Alzheimer's disease;Apoptosis;Protein processing in endoplasmic reticulum	Calpain_III;Peptidase_C2	AAAYRNCTG_UNKNOWN;ACOSTA_PROLIFERATION_INDEPENDENT_MYC_TARGETS_DN;BIOCARTA_INTEGRIN_PATHWAY;BIOCARTA_MCALPAIN_PATHWAY;BIOCARTA_P35ALZHEIMERS_PATHWAY;BIOCARTA_UCALPAIN_PATHWAY;BRUINS_UVC_RESPONSE_LATE;BURTON_ADIPOGENESIS_PEAK_AT_2HR;CAGGTA_V$AREB6_01;CELL_PROLIFERATION_GO_0008283;CHEMNITZ_RESPONSE_TO_PROSTAGLANDIN_E2_DN;chr11q13;DAIRKEE_TERT_TARGETS_UP;DEBIASI_APOPTOSIS_BY_REOVIRUS_INFECTION_DN;GA…	REACT_275864	0.000146177	0.000169492	13	21.3386	21.5922	NaN	20.864	21.4176	21.6977	21.0114	20.9399	4	4	4	4	2.50927	0.00403043	1.34364
O35381	Anp32a	AN32A_MOUSE	Acidic leucine-rich nuclear phosphoprotein 32 family member A	24.1221	23.9205	24.4473	24.227	24.0889	24.2706	24.9922	24.6863	24.9949	25.101	25.2776	25.0668	25.1644	25.1161	25.4083	23.9358	+	+				biological regulation;biosynthetic process;cellular biosynthetic process;cellular macromolecule biosynthetic process;cellular macromolecule metabolic process;cellular metabolic process;cellular nitrogen compound metabolic process;cellular process;macromolecule biosynthetic process;macromolecule metabolic process;metabolic process;nitrogen compound metabolic process;nucleic acid metabolic process;…		cell part;cytoplasm;cytoplasmic part;endoplasmic reticulum;intracellular membrane-bounded organelle;intracellular organelle;intracellular organelle part;intracellular part;membrane-bounded organelle;nuclear matrix;nuclear part;nucleus;organelle;organelle part;perinuclear region of cytoplasm			AACTTT_UNKNOWN;AMUNDSON_POOR_SURVIVAL_AFTER_GAMMA_RADIATION_2G;BENPORATH_NANOG_TARGETS;BENPORATH_SOX2_TARGETS;BERNARD_PPAPDC1B_TARGETS_UP;BIOCARTA_SET_PATHWAY;BLUM_RESPONSE_TO_SALIRASIB_DN;BROWNE_HCMV_INFECTION_10HR_DN;BUYTAERT_PHOTODYNAMIC_THERAPY_STRESS_DN;BYSTRYKH_HEMATOPOIESIS_STEM_CELL_AND_BRAIN_QTL_TRANS;CAGCTG_V$AP4_Q5;CAGGTA_V$AREB6_01;CAGGTG_V$E12_Q6;CELLULAR_LOCALIZATION;CHEN_HOXA5_TARG…	REACT_274491	0.000146177	0.000169492	7	24.2949	23.7432	25.6234	25.2382	24.1792	24.5095	25.1101	24.9062	4	4	4	4	1.50555	0.0122807	3.51898
O35382	Exoc4	EXOC4_MOUSE	Exocyst complex component 4	21.9333	22.1481	21.9465	22.1236	21.9532	21.8975	21.9419	21.7606	21.8387	22.0233	22.0749	21.9507	21.9493	21.9941	21.7354	22.031						cellular process;establishment of localization;establishment of protein localization;membrane docking;protein transport;transport;vesicle docking;vesicle docking involved in exocytosis	binding;enzyme binding;GTPase binding;PDZ domain binding;protein binding;protein domain specific binding;protein N-terminus binding;Ral GTPase binding;Ras GTPase binding;small GTPase binding	cell cortex part;cell part;cell projection part;cytoplasm;cytoplasmic part;exocyst;growth cone membrane;intracellular part;macromolecular complex;membrane;membrane part;myelin sheath abaxonal region;plasma membrane;plasma membrane part;protein complex	Tight junction	Sec8_exocyst	AFFAR_YY1_TARGETS_UP;BENPORATH_NANOG_TARGETS;BURTON_ADIPOGENESIS_9;CASTELLANO_NRAS_TARGETS_UP;CHEMNITZ_RESPONSE_TO_PROSTAGLANDIN_E2_DN;chr7q31;CYTOPLASM;GRAESSMANN_APOPTOSIS_BY_DOXORUBICIN_DN;GRAESSMANN_APOPTOSIS_BY_DOXORUBICIN_UP;GRAESSMANN_RESPONSE_TO_MC_AND_DOXORUBICIN_UP;GSE10239_MEMORY_VS_KLRG1INT_EFF_CD8_TCELL_UP;GSE14308_TH2_VS_INDUCED_TREG_UP;GSE15324_NAIVE_VS_ACTIVATED_ELF4_KO_CD8_TCELL_…	REACT_298481;REACT_302653;REACT_358790	0.000146177	0.000169492	20	21.7023	21.7866	24.1291	21.071	22.0379	21.8883	21.9719	21.9274	4	4	4	4	0.516838	0.489877	0.375115
O35386	Phyh	PAHX_MOUSE	Phytanoyl-CoA dioxygenase, peroxisomal	19.8732	18.8231	19.235	16.907	19.4694	17.0522	19.2949	19.4112	19.5471	19.1601	16.844	19.1482	19.3212	18.9313	19.3841	19.3696						carboxylic acid catabolic process;carboxylic acid metabolic process;catabolic process;cellular catabolic process;cellular ketone metabolic process;cellular lipid catabolic process;cellular lipid metabolic process;cellular metabolic process;cellular process;fatty acid alpha-oxidation;fatty acid catabolic process;fatty acid metabolic process;fatty acid oxidation;isoprenoid metabolic process;lipid c…	binding;carboxylic acid binding;catalytic activity;cation binding;cofactor binding;ion binding;L-ascorbic acid binding;metal ion binding;oxidoreductase activity;oxidoreductase activity, acting on paired donors, with incorporation or reduction of molecular oxygen;oxidoreductase activity, acting on paired donors, with incorporation or reduction of molecular oxygen, 2-oxoglutarate as one donor, and …	cell part;cytoplasmic part;intracellular membrane-bounded organelle;intracellular organelle;intracellular part;membrane-bounded organelle;microbody;mitochondrion;organelle;peroxisome	Peroxisome	PhyH	ANATOMICAL_STRUCTURE_DEVELOPMENT;BERENJENO_TRANSFORMED_BY_RHOA_DN;CAIRO_HEPATOBLASTOMA_CLASSES_DN;CAIRO_LIVER_DEVELOPMENT_DN;CHEN_METABOLIC_SYNDROM_NETWORK;CHIARADONNA_NEOPLASTIC_TRANSFORMATION_KRAS_DN;chr10p15;CHUNG_BLISTER_CYTOTOXICITY_UP;CYTOPLASM;CYTOPLASMIC_PART;DELYS_THYROID_CANCER_DN;DIAZ_CHRONIC_MEYLOGENOUS_LEUKEMIA_UP;DITTMER_PTHLH_TARGETS_UP;DURAND_STROMA_MAX_DN;ELECTRON_CARRIER_ACTIVIT…	REACT_330932	0.000146177	0.000169492	3	NaN	19.3731	NaN	19.7494	19.3105	19.3918	19.2852	19.2515	3	3	3	4	0.0650038	0.655692	0.013189
O35387	Hax1	HAX1_MOUSE	HCLS1-associated protein X-1	19.77	19.7811	19.8572	19.3553	19.5947	19.1071	19.3893	19.725	18.9284	19.6087	18.996	19.5308	19.4649	19.3601	16.367	19.5485						biological regulation;cell surface receptor linked signaling pathway;cellular component organization;cellular component organization or biogenesis;cellular process;cellular response to chemical stimulus;cellular response to cytokine stimulus;cellular response to organic substance;cellular response to stimulus;positive regulation of actin cytoskeleton reorganization;positive regulation of biologic…	binding;cytokine binding;growth factor binding;interleukin-1 binding;protein binding;protein N-terminus binding	actin cytoskeleton;apical plasma membrane;cell part;cell projection;clathrin-coated vesicle;coated vesicle;cytoplasm;cytoplasmic membrane-bounded vesicle;cytoplasmic part;cytoplasmic vesicle;cytoskeleton;endoplasmic reticulum;intracellular membrane-bounded organelle;intracellular non-membrane-bounded organelle;intracellular organelle;intracellular organelle part;intracellular part;lamellipodium;m…			ACEVEDO_LIVER_TUMOR_VS_NORMAL_ADJACENT_TISSUE_UP;BENPORATH_MYC_MAX_TARGETS;BOHN_PRIMARY_IMMUNODEFICIENCY_SYNDROM_UP;CAMP_UP.V1_UP;CELL_FRACTION;chr1q21;CYTOKINE_BINDING;CYTOPLASM;CYTOPLASMIC_PART;DANG_BOUND_BY_MYC;DELPUECH_FOXO3_TARGETS_DN;DITTMER_PTHLH_TARGETS_UP;ENDOPLASMIC_RETICULUM;FLECHNER_PBL_KIDNEY_TRANSPLANT_OK_VS_DONOR_UP;FULCHER_INFLAMMATORY_RESPONSE_LECTIN_VS_LPS_UP;GOTZMANN_EPITHELIAL…		0.000146177	0.000169492	5	19.6876	19.8026	NaN	19.1178	19.6909	19.454	19.266	19.4578	4	4	4	3	0.418969	0.138261	1.04834
O35393	Efnb3	EFNB3_MOUSE	Ephrin-B3	21.2672	21.5102	21.0202	21.2877	21.7426	21.5789	21.4904	21.5444	20.7488	20.6125	20.4845	20.7665	20.7133	20.9036	20.5041	21.8305	+	+				adult behavior;adult locomotory behavior;adult walking behavior;axon choice point recognition;axon guidance;behavior;biological regulation;cell recognition;cell surface receptor linked signaling pathway;cellular process;cellular response to stimulus;chemotaxis;enzyme linked receptor protein signaling pathway;ephrin receptor signaling pathway;locomotion;locomotory behavior;multicellular organismal…	binding;ephrin receptor binding;protein binding;receptor binding	cell part;integral to membrane;intrinsic to membrane;membrane;membrane part;plasma membrane	Axon guidance	Ephrin	AAAGGGA,MIR-204,MIR-211;AACTTT_UNKNOWN;AGGAAGC,MIR-516-3P;ANATOMICAL_STRUCTURE_DEVELOPMENT;ATACCTC,MIR-202;ATGGYGGA_UNKNOWN;BYSTRYKH_HEMATOPOIESIS_STEM_CELL_FGF3;CACCAGC,MIR-138;CARD_MIR302A_TARGETS;CELL_CELL_SIGNALING;CELL_SURFACE_RECEPTOR_LINKED_SIGNAL_TRANSDUCTION_GO_0007166;CHIBA_RESPONSE_TO_TSA_UP;chr17p13;CTTTGT_V$LEF1_Q2;CYTAGCAAY_UNKNOWN;DOANE_RESPONSE_TO_ANDROGEN_DN;ENZYME_LINKED_RECEPTO…	REACT_278281;REACT_292566;REACT_313804;REACT_314615	0.000146177	0.000169492	5	20.4972	21.9662	NaN	20.5272	21.2713	21.5891	20.6531	20.9879	4	4	4	4	2.06109	0.00607407	2.67754
O35405	Pld3	PLD3_MOUSE	5'-3' exonuclease PLD3	19.7905	19.8161	16.8675	16.907	20.2264	19.9379	19.6734	20.1257	19.9989	16.8503	20.3449	19.889	20.0472	19.9839	20.2286	21.5961	+					catabolic process;lipid catabolic process;lipid metabolic process;metabolic process;primary metabolic process	catalytic activity;hydrolase activity;hydrolase activity, acting on ester bonds;lipase activity;NAPE-specific phospholipase D activity;phospholipase activity;phospholipase D activity;phosphoric diester hydrolase activity;phosphoric ester hydrolase activity	cell part;cytoplasmic part;endoplasmic reticulum membrane;endoplasmic reticulum part;extracellular membrane-bounded organelle;extracellular organelle;extracellular region part;extracellular vesicular exosome;integral to membrane;intracellular organelle part;intracellular part;intrinsic to membrane;membrane;membrane part;membrane-bounded organelle;membrane-bounded vesicle;organelle;organelle membr…			ATGCTGG,MIR-338;BERENJENO_TRANSFORMED_BY_RHOA_DN;BORCZUK_MALIGNANT_MESOTHELIOMA_UP;BRUINS_UVC_RESPONSE_VIA_TP53_GROUP_B;BURTON_ADIPOGENESIS_8;CHANG_CORE_SERUM_RESPONSE_DN;CHEN_METABOLIC_SYNDROM_NETWORK;chr19q13;CONCANNON_APOPTOSIS_BY_EPOXOMICIN_UP;CTACCTC,LET-7A,LET-7B,LET-7C,LET-7D,LET-7E,LET-7F,MIR-98,LET-7G,LET-7I;DACOSTA_UV_RESPONSE_VIA_ERCC3_TTD_UP;DACOSTA_UV_RESPONSE_VIA_ERCC3_UP;DAIRKEE_TE…	REACT_352856	0.000146177	0.000169492	9	19.5017	19.7994	NaN	20.4926	19.8033	19.9909	20.0776	20.464	2	4	3	4	0.86165	0.0246182	0.338114
O35409	Folh1	FOLH1_MOUSE	Glutamate carboxypeptidase 2	20.9504	20.9322	20.7854	21.2181	21.3391	21.535	21.5222	21.4126	20.3437	20.2937	20.2584	20.0031	20.5089	20.5317	19.436	20.6559	+	+	+			cellular aromatic compound metabolic process;cellular metabolic process;cellular process;coenzyme metabolic process;cofactor metabolic process;folic acid-containing compound metabolic process;heterocycle metabolic process;macromolecule metabolic process;metabolic process;nitrogen compound metabolic process;primary metabolic process;protein metabolic process;proteolysis;pteridine-containing compou…	binding;carboxypeptidase activity;catalytic activity;cation binding;dipeptidase activity;exopeptidase activity;hydrolase activity;ion binding;metal ion binding;metallopeptidase activity;peptidase activity;peptidase activity, acting on L-amino acid peptides	cell part;extracellular membrane-bounded organelle;extracellular organelle;extracellular region part;extracellular vesicular exosome;integral to membrane;integral to plasma membrane;intrinsic to membrane;intrinsic to plasma membrane;membrane part;membrane-bounded organelle;membrane-bounded vesicle;organelle;plasma membrane part;vesicle	Vitamin digestion and absorption	PA;Peptidase_M28;TFR_dimer	AFFAR_YY1_TARGETS_DN;ASTON_MAJOR_DEPRESSIVE_DISORDER_DN;CELL_FRACTION;CHANDRAN_METASTASIS_UP;CHESLER_BRAIN_HIGHEST_GENETIC_VARIANCE;CHESLER_BRAIN_QTL_CIS;CHIANG_LIVER_CANCER_SUBCLASS_POLYSOMY7_UP;chr11p11;DODD_NASOPHARYNGEAL_CARCINOMA_UP;FALVELLA_SMOKERS_WITH_LUNG_CANCER;FLECHNER_BIOPSY_KIDNEY_TRANSPLANT_REJECTED_VS_OK_DN;FRASOR_RESPONSE_TO_ESTRADIOL_DN;GSE13411_IGM_VS_SWITCHED_MEMORY_BCELL_UP;GS…		0.000146177	0.000169492	10	20.5015	21.9272	21.4722	NaN	20.9716	21.4522	20.2247	20.2831	4	4	4	4	3.53296	0.0014417	3.14151
O35435	Dhodh	PYRD_MOUSE	Dihydroorotate dehydrogenase (quinone), mitochondrial	21.2643	21.2508	21.034	21.1422	21.12	21.0777	20.8651	20.9173	20.7351	20.9411	20.9638	20.9028	21.0042	21.1249	20.6723	20.7528						biological regulation;biosynthetic process;body fluid secretion;cellular aromatic compound metabolic process;cellular biosynthetic process;cellular metabolic process;cellular nitrogen compound biosynthetic process;cellular nitrogen compound metabolic process;cellular process;'de novo' pyrimidine base biosynthetic process;'de novo' UMP biosynthetic process;establishment of localization;female preg…	binding;catalytic activity;coenzyme binding;cofactor binding;dihydroorotate dehydrogenase activity;drug binding;FMN binding;nucleotide binding;oxidoreductase activity;oxidoreductase activity, acting on the CH-CH group of donors;oxidoreductase activity, acting on the CH-CH group of donors, quinone or related compound as acceptor;quinone binding;ubiquinone binding	cell body;cell part;cytoplasmic part;integral to membrane;intracellular membrane-bounded organelle;intracellular organelle;intracellular organelle part;intracellular part;intrinsic to membrane;intrinsic to mitochondrial inner membrane;intrinsic to organelle membrane;membrane part;membrane-bounded organelle;mitochondrial membrane part;mitochondrial part;mitochondrion;neuronal cell body;nuclear par…	Pyrimidine metabolism	DHO_dh	BILD_MYC_ONCOGENIC_SIGNATURE;BLALOCK_ALZHEIMERS_DISEASE_UP;BRUINS_UVC_RESPONSE_VIA_TP53_GROUP_A;BUYTAERT_PHOTODYNAMIC_THERAPY_STRESS_DN;BYSTRYKH_HEMATOPOIESIS_STEM_CELL_AND_BRAIN_QTL_TRANS;CAIRO_HEPATOBLASTOMA_DN;CAR_HPX;CAR_IGFBP1;CHANDRAN_METASTASIS_UP;chr16q22;ESC_J1_UP_LATE.V1_DN;FOSTER_KDM1A_TARGETS_DN;GCNP_SHH_UP_EARLY.V1_UP;GCNP_SHH_UP_LATE.V1_DN;GRAESSMANN_APOPTOSIS_BY_DOXORUBICIN_DN;GRAE…	REACT_353601	0.000146177	0.000169492	8	20.9453	21.2783	23.3533	19.7635	21.1728	20.9951	20.8857	20.8886	4	4	4	4	1.31674	0.0836461	2.07173
O35449	Prrt1	PRRT1_MOUSE	Proline-rich transmembrane protein 1	20.2402	20.14	20.6589	16.907	20.4344	19.8635	20.3235	20.1603	20.2505	20.9935	20.7703	21.0821	21.1105	21.057	21.8148	21.1357	+		+			response to biotic stimulus;response to stimulus		cell junction;cell part;integral to membrane;intrinsic to membrane;membrane;membrane part;plasma membrane;synapse		Dispanin	BENPORATH_ES_WITH_H3K27ME3;chr6p21;DARWICHE_PAPILLOMA_PROGRESSION_RISK;FIGUEROA_AML_METHYLATION_CLUSTER_4_UP;FIGUEROA_AML_METHYLATION_CLUSTER_6_UP;GSE11057_NAIVE_VS_CENT_MEMORY_CD4_TCELL_UP;GSE11057_NAIVE_VS_EFF_MEMORY_CD4_TCELL_UP;GSE11057_NAIVE_VS_MEMORY_CD4_TCELL_UP;GSE13229_IMM_VS_MATURE_NKCELL_UP;GSE15750_DAY6_VS_DAY10_TRAF6KO_EFF_CD8_TCELL_DN;GSE15767_MED_VS_SCS_MAC_LN_DN;GSE16522_ANTI_CD3C…		0.000146177	0.000169492	3	NaN	NaN	NaN	NaN	20.3464	20.1954	20.7741	21.2795	3	4	4	4	1.08742	0.0161109	0.705971
O35454	Clcn6	CLCN6_MOUSE	Chloride transport protein 6	20.4098	20.3972	20.4129	20.7155	20.865	20.8355	20.7744	20.7224	20.7511	20.6936	20.678	20.5021	20.7158	20.772	20.0564	21.0749						response to abiotic stimulus;response to external stimulus;response to mechanical stimulus;response to stimulus	active transmembrane transporter activity;adenyl nucleotide binding;adenyl ribonucleotide binding;anion channel activity;anion transmembrane transporter activity;antiporter activity;ATP binding;binding;channel activity;chloride channel activity;gated channel activity;ion channel activity;ion transmembrane transporter activity;nucleotide binding;passive transmembrane transporter activity;purine nu…	cell part;cytoplasmic part;endosomal part;endosome membrane;integral to membrane;intracellular organelle part;intracellular part;intrinsic to membrane;lysosomal membrane;membrane;membrane part;organelle membrane;organelle part;vacuolar membrane;vacuolar part		CBS;Voltage_CLC	ATM_DN.V1_UP;BENPORATH_MYC_MAX_TARGETS;BENPORATH_MYC_TARGETS_WITH_EBOX;BROWNE_HCMV_INFECTION_1HR_DN;BROWNE_HCMV_INFECTION_6HR_DN;BUYTAERT_PHOTODYNAMIC_THERAPY_STRESS_UP;CAGGTG_V$E12_Q6;CHANG_CORE_SERUM_RESPONSE_DN;chr1p36;CTGAGCC,MIR-24;DANG_BOUND_BY_MYC;FERNANDEZ_BOUND_BY_MYC;GAGCCAG,MIR-149;GCNP_SHH_UP_EARLY.V1_UP;GCNP_SHH_UP_LATE.V1_DN;GGGTGGRR_V$PAX4_03;GSE10325_CD4_TCELL_VS_BCELL_DN;GSE11924…	REACT_346473	0.000146177	0.000169492	10	20.2707	20.8358	NaN	NaN	20.4838	20.7994	20.6562	20.6548	4	4	4	4	0.450952	0.297635	0.932401
P63321	Rala	RALA_MOUSE	Ras-related protein Ral-A	22.0057	22.3041	22.0506	21.8362	21.998	21.6018	22.4817	21.9715	21.315	21.8013	21.9005	21.8128	22.0084	22.1389	22.6082	23.3158	+					actin cytoskeleton organization;actin cytoskeleton reorganization;actin filament-based process;anatomical structure formation involved in morphogenesis;biological regulation;cellular component organization;cellular component organization at cellular level;cellular component organization or biogenesis;cellular component organization or biogenesis at cellular level;cellular localization;cellular pr…	ATPase binding;binding;catalytic activity;cytoskeletal protein binding;Edg-2 lysophosphatidic acid receptor binding;endothelial differentiation G-protein coupled receptor binding;enzyme binding;GDP binding;G-protein-coupled receptor binding;GTP binding;GTPase activity;guanyl nucleotide binding;guanyl ribonucleotide binding;hydrolase activity;hydrolase activity, acting on acid anhydrides;hydrolase…	adherens junction;anchoring junction;cell division site part;cell junction;cell part;cell surface;cell-substrate adherens junction;cell-substrate junction;cleavage furrow;cytoplasmic membrane-bounded vesicle;cytoplasmic part;cytoplasmic vesicle;cytoplasmic vesicle membrane;cytoplasmic vesicle part;endocytic vesicle;extracellular membrane-bounded organelle;extracellular organelle;extracellular reg…	Pancreatic cancer;Pathways in cancer	Ras	AAGWWRNYGGC_UNKNOWN;ACTGAAA,MIR-30A-3P,MIR-30E-3P;ACTGCCT,MIR-34B;ASTON_MAJOR_DEPRESSIVE_DISORDER_DN;ATGTAGC,MIR-221,MIR-222;BEHAVIOR;BIOCARTA_RAS_PATHWAY;BLALOCK_ALZHEIMERS_DISEASE_UP;BLUM_RESPONSE_TO_SALIRASIB_UP;BORCZUK_MALIGNANT_MESOTHELIOMA_UP;BROCKE_APOPTOSIS_REVERSED_BY_IL6;BRUINS_UVC_RESPONSE_LATE;BYSTRYKH_HEMATOPOIESIS_STEM_CELL_QTL_TRANS;CHANDRAN_METASTASIS_TOP50_UP;CHANDRAN_METASTASIS_…	REACT_296095;REACT_302653	0.000146177	0.000169492	4	21.0574	21.1556	25.6371	22.1008	22.0492	22.0132	21.7074	22.5178	4	4	4	4	1.15432	0.0266008	1.08337
O35465	Fkbp8	FKBP8_MOUSE	Peptidyl-prolyl cis-trans isomerase FKBP8	20.0689	20.1152	20.1136	19.7621	19.8775	19.7672	20.2168	19.9237	19.6394	20.1368	20.1028	20.159	20.1642	19.9961	20.2525	20.3098						anatomical structure development;apoptosis;biological regulation;camera-type eye development;cell death;cell fate specification;cell surface receptor linked signaling pathway;cellular developmental process;cellular macromolecule metabolic process;cellular metabolic process;cellular process;cellular protein metabolic process;cellular response to stimulus;chaperone-mediated protein folding;death;de…	binding;catalytic activity;cis-trans isomerase activity;drug binding;FK506 binding;identical protein binding;isomerase activity;macrolide binding;peptidyl-prolyl cis-trans isomerase activity;protein binding	cell part;cytoplasmic part;endoplasmic reticulum part;envelope;integral to endoplasmic reticulum membrane;integral to membrane;integral to organelle membrane;intracellular membrane-bounded organelle;intracellular organelle;intracellular organelle part;intracellular part;intrinsic to endoplasmic reticulum membrane;intrinsic to membrane;intrinsic to organelle membrane;membrane;membrane part;membran…		FKBP_C;TPR_1	AKT_UP_MTOR_DN.V1_UP;BLALOCK_ALZHEIMERS_DISEASE_UP;BONOME_OVARIAN_CANCER_SURVIVAL_SUBOPTIMAL_DEBULKING;BROWNE_HCMV_INFECTION_18HR_DN;BROWNE_HCMV_INFECTION_48HR_DN;CAGGTG_V$E12_Q6;CCTNTMAGA_UNKNOWN;chr19p12;CTTTAAR_UNKNOWN;ENK_UV_RESPONSE_EPIDERMIS_DN;GGGCGGR_V$SP1_Q6;GOBERT_OLIGODENDROCYTE_DIFFERENTIATION_DN;GRADE_COLON_CANCER_UP;GSE14308_TH2_VS_INDUCED_TREG_UP;GSE1448_CTRL_VS_ANTI_VALPHA2_DP_THY…		0.000146177	0.000169492	6	19.0105	18.8597	22.8495	19.2904	20.0149	19.9463	20.0095	20.1807	4	4	4	4	0.412739	0.383528	0.0121957
O35474	Edil3	EDIL3_MOUSE	EGF-like repeat and discoidin I-like domain-containing protein 3	19.0182	19.3187	18.4881	19.0126	19.508	19.2212	19.1907	18.6139	19.048	18.1902	17.7919	17.8262	16.8004	16.5422	16.367	18.6669	+	+	+			biological adhesion;biological regulation;cell adhesion;cellular process;developmental process;multicellular organismal development;multicellular organismal process;positive regulation of biological process;positive regulation of cell adhesion;positive regulation of cell-substrate adhesion;positive regulation of cellular process;regulation of biological process;regulation of cell adhesion;regulat…	binding;calcium ion binding;cation binding;ion binding;metal ion binding	extracellular membrane-bounded organelle;extracellular organelle;extracellular region part;extracellular vesicular exosome;membrane-bounded organelle;membrane-bounded vesicle;organelle;vesicle		EGF;F5_F8_type_C	AACTTT_UNKNOWN;ATF2_UP.V1_DN;BROWN_MYELOID_CELL_DEVELOPMENT_UP;CHANG_IMMORTALIZED_BY_HPV31_UP;CHARAFE_BREAST_CANCER_BASAL_VS_MESENCHYMAL_DN;CHARAFE_BREAST_CANCER_LUMINAL_VS_MESENCHYMAL_DN;CHEMNITZ_RESPONSE_TO_PROSTAGLANDIN_E2_DN;chr5q14;DAIRKEE_TERT_TARGETS_DN;DOUGLAS_BMI1_TARGETS_UP;DUNNE_TARGETS_OF_AML1_MTG8_FUSION_DN;FUJII_YBX1_TARGETS_UP;GGGYGTGNY_UNKNOWN;GSE15215_CD2_POS_VS_NEG_PDC_UP;GSE335…		0.000146177	0.000169492	5	18.7096	19.9432	NaN	18.0286	18.9594	19.1335	18.2141	18.6669	4	4	4	1	2.45744	0.00253132	1.15193
O35492	Clk3	CLK3_MOUSE	Dual specificity protein kinase CLK3	20.2351	20.6511	16.8675	16.907	20.8257	20.9412	20.7186	20.6301	20.7107	20.9279	20.9265	20.7431	20.7014	20.903	20.374	16.1942	+	+				biological regulation;cellular macromolecule metabolic process;cellular metabolic process;cellular process;cellular protein metabolic process;macromolecule metabolic process;macromolecule modification;metabolic process;peptidyl-amino acid modification;peptidyl-tyrosine modification;peptidyl-tyrosine phosphorylation;phosphate-containing compound metabolic process;phosphorus metabolic process;phosp…	adenyl nucleotide binding;adenyl ribonucleotide binding;ATP binding;binding;catalytic activity;kinase activity;nucleotide binding;phosphotransferase activity, alcohol group as acceptor;protein kinase activity;protein serine/threonine kinase activity;protein serine/threonine/tyrosine kinase activity;protein tyrosine kinase activity;purine nucleotide binding;purine ribonucleoside triphosphate bindi…	acrosomal vesicle;cell part;cytoplasmic membrane-bounded vesicle;cytoplasmic part;cytoplasmic vesicle;cytoskeleton;intermediate filament cytoskeleton;intracellular membrane-bounded organelle;intracellular non-membrane-bounded organelle;intracellular organelle;intracellular organelle part;intracellular part;membrane;membrane-bounded organelle;membrane-bounded vesicle;non-membrane-bounded organelle…		Pkinase	AAGCACA,MIR-218;AATGTGA,MIR-23A,MIR-23B;AGCTCCT,MIR-28;CACCAGC,MIR-138;CCTGTGA,MIR-513;CHENG_IMPRINTED_BY_ESTRADIOL;chr15q24;DACOSTA_UV_RESPONSE_VIA_ERCC3_COMMON_UP;DACOSTA_UV_RESPONSE_VIA_ERCC3_UP;DEBIASI_APOPTOSIS_BY_REOVIRUS_INFECTION_UP;DUAN_PRDM5_TARGETS;GGCAGTG,MIR-324-3P;GINESTIER_BREAST_CANCER_20Q13_AMPLIFICATION_DN;GSE13493_DP_VS_CD4INTCD8POS_THYMOCYTE_UP;GSE14308_INDUCED_VS_NATURAL_TREG…		0.000146177	0.000169492	4	20.9437	NaN	NaN	21.0977	20.4431	20.7789	20.8271	20.6595	2	4	4	3	0.726816	0.034078	1.09168
Q9CQ86	Mien1	MIEN1_MOUSE	Migration and invasion enhancer 1	21.3193	21.2184	16.8675	20.2756	16.7711	17.0522	21.6052	20.056	16.6434	16.8503	20.5938	20.3914	21.0738	20.8136	21.7431	22.0826	+		+			apoptosis;biological regulation;cell death;cell redox homeostasis;cellular homeostasis;cellular process;death;homeostatic process;negative regulation of apoptosis;negative regulation of biological process;negative regulation of cell death;negative regulation of cellular process;negative regulation of programmed cell death;positive regulation of biological process;positive regulation of cell migra…	binding;selenium binding	cell part;cytoplasm;cytoplasmic part;cytosol;extracellular membrane-bounded organelle;extracellular organelle;extracellular region part;extracellular vesicular exosome;intracellular organelle part;intracellular part;intrinsic to internal side of plasma membrane;intrinsic to membrane;intrinsic to plasma membrane;membrane part;membrane-bounded organelle;membrane-bounded vesicle;nuclear part;nucleop…		Rdx	BERENJENO_TRANSFORMED_BY_RHOA_DN;BERTUCCI_INVASIVE_CARCINOMA_DUCTAL_VS_LOBULAR_UP;CACGTG_V$MYC_Q2;CACTTTG,MIR-520G,MIR-520H;CAGGTG_V$E12_Q6;chr17q12;FEVR_CTNNB1_TARGETS_UP;GGGYGTGNY_UNKNOWN;GRADE_COLON_CANCER_UP;GSE13306_RA_VS_UNTREATED_MEM_CD4_TCELL_UP;GSE14000_TRANSLATED_RNA_VS_MRNA_16H_LPS_DC_DN;GSE14308_TH1_VS_INDUCED_TREG_DN;GSE16522_ANTI_CD3CD28_STIM_VS_UNSTIM_NAIVE_CD8_TCELL_DN;GSE17721_0.…		0.000146177	0.000169492	3	20.1062	NaN	NaN	22.1295	20.9378	20.8306	20.4926	21.4283	3	2	2	4	0.676233	0.0373925	0.376163
O35544	Slc1a6	EAA4_MOUSE	Excitatory amino acid transporter 4	23.8266	24.2038	24.7575	24.3064	23.4119	23.1727	23.317	23.2383	23.6394	24.0505	23.9373	24.1267	24.2513	24.1882	24.6997	20.9665						acidic amino acid transport;amine transport;amino acid transport;anion transport;biological regulation;carboxylic acid transport;cellular chemical homeostasis;cellular homeostasis;cellular ion homeostasis;cellular process;chemical homeostasis;establishment of localization;homeostatic process;ion homeostasis;ion transport;L-glutamate transport;nitrogen compound transport;organic acid transport;org…	acidic amino acid transmembrane transporter activity;active transmembrane transporter activity;amine transmembrane transporter activity;amino acid transmembrane transporter activity;anion transmembrane transporter activity;anion:cation symporter activity;carboxylic acid transmembrane transporter activity;cation transmembrane transporter activity;dicarboxylic acid transmembrane transporter activit…	cell part;cytoplasmic part;Golgi apparatus;integral to membrane;intracellular membrane-bounded organelle;intracellular organelle;intracellular part;intrinsic to membrane;membrane;membrane part;membrane-bounded organelle;organelle		SDF	ACTIVE_TRANSMEMBRANE_TRANSPORTER_ACTIVITY;AFFAR_YY1_TARGETS_UP;AMINE_TRANSMEMBRANE_TRANSPORTER_ACTIVITY;AMINE_TRANSPORT;AMINO_ACID_TRANSMEMBRANE_TRANSPORTER_ACTIVITY;AMINO_ACID_TRANSPORT;CARBOXYLIC_ACID_TRANSMEMBRANE_TRANSPORTER_ACTIVITY;CARBOXYLIC_ACID_TRANSPORT;CELL_CELL_SIGNALING;CELL_FRACTION;chr19p13;ENK_UV_RESPONSE_EPIDERMIS_DN;ENK_UV_RESPONSE_KERATINOCYTE_UP;ESTABLISHMENT_OF_LOCALIZATION;G…	REACT_277017;REACT_287745	0.000146177	0.000169492	7	23.7204	22.9475	NaN	NaN	24.2736	23.2849	23.9385	23.5264	4	4	4	4	0.357523	0.174817	0.750978
O35551	Rabep1	RABE1_MOUSE	Rab GTPase-binding effector protein 1	22.361	22.0466	22.2339	22.2866	21.5846	21.7355	21.8848	21.812	22.0348	22.2208	22.4684	22.1127	21.8615	21.4758	21.6834	22.4583	+					apoptosis;cell death;cellular component organization;cellular component organization or biogenesis;cellular membrane organization;cellular process;death;endocytosis;establishment of localization;establishment of protein localization;membrane invagination;membrane organization;programmed cell death;protein transport;transport;vesicle-mediated transport	binding;enzyme activator activity;enzyme regulator activity;GTPase activator activity;GTPase regulator activity;identical protein binding;nucleoside-triphosphatase regulator activity;protein binding;protein dimerization activity;protein homodimerization activity	cell part;cytoplasmic membrane-bounded vesicle;cytoplasmic part;cytoplasmic vesicle;early endosome;endocytic vesicle;endosome;intracellular membrane-bounded organelle;intracellular organelle;intracellular part;membrane-bounded organelle;membrane-bounded vesicle;organelle;recycling endosome;vesicle	Endocytosis	Rab5-bind;Rabaptin	AAGCACA,MIR-218;AAGCACT,MIR-520F;AGCACTT,MIR-93,MIR-302A,MIR-302B,MIR-302C,MIR-302D,MIR-372,MIR-373,MIR-520E,MIR-520A,MIR-526B,MIR-520B,MIR-520C,MIR-520D;BLALOCK_ALZHEIMERS_DISEASE_INCIPIENT_UP;BLALOCK_ALZHEIMERS_DISEASE_UP;BRUINS_UVC_RESPONSE_LATE;BUYTAERT_PHOTODYNAMIC_THERAPY_STRESS_UP;CAGGTG_V$E12_Q6;chr17p13;CYTOPLASM;CYTOPLASMIC_PART;EARLY_ENDOSOME;ENDOSOME;ESTABLISHMENT_OF_LOCALIZATION;FARM…		0.000146177	0.000169492	15	22.3628	21.6849	24.6574	22.324	22.232	21.7542	22.2092	21.8697	4	4	4	4	1.37607	0.0286653	0.0704123
O35566	Cd151	CD151_MOUSE	CD151 antigen	20.5917	20.2468	16.8675	20.6287	20.4431	20.4173	20.9328	20.3326	20.4518	20.3994	20.9591	20.2812	20.1673	20.2498	16.367	19.6825						cell activation;cell migration;cell motility;cell proliferation;cellular component movement;cellular process;immune system process;leukocyte activation;leukocyte proliferation;locomotion;lymphocyte activation;lymphocyte proliferation;mononuclear cell proliferation;T cell activation;T cell proliferation	binding;integrin binding;protein binding;protein complex binding;receptor binding	adherens junction;anchoring junction;basement membrane;cell junction;cell part;cell-substrate adherens junction;cell-substrate junction;extracellular matrix part;extracellular region part;focal adhesion;integral to membrane;intrinsic to membrane;membrane part		Tetraspannin	BANDRES_RESPONSE_TO_CARMUSTIN_MGMT_48HR_DN;BCAT_BILD_ET_AL_UP;BERENJENO_TRANSFORMED_BY_RHOA_UP;BROWNE_HCMV_INFECTION_48HR_DN;BURTON_ADIPOGENESIS_6;BYSTRYKH_HEMATOPOIESIS_STEM_CELL_QTL_TRANS;CATTGTYY_V$SOX9_B1;CELL_FRACTION;CHIARADONNA_NEOPLASTIC_TRANSFORMATION_CDC25_DN;CHIARADONNA_NEOPLASTIC_TRANSFORMATION_KRAS_DN;chr11p15;CTGCAGY_UNKNOWN;DANG_REGULATED_BY_MYC_DN;DELYS_THYROID_CANCER_UP;GGGAGGRR_…	REACT_318656;REACT_346453	0.000146177	0.000169492	2	NaN	NaN	20.8052	NaN	20.489	20.5315	20.5229	20.0332	3	4	4	3	0.435728	0.104277	0.459013
O35593	Psmd14	PSDE_MOUSE	26S proteasome non-ATPase regulatory subunit 14	22.6263	22.5774	22.59	22.5436	22.4231	22.1295	22.5035	22.3786	22.7072	22.6822	22.8001	22.7571	22.7394	22.5276	22.6496	23.0503	+					biological regulation;cellular macromolecule metabolic process;cellular metabolic process;cellular nitrogen compound metabolic process;cellular process;cellular protein metabolic process;cellular response to stimulus;cellular response to stress;DNA metabolic process;DNA recombination;DNA repair;double-strand break repair;double-strand break repair via homologous recombination;double-strand break …	binding;catalytic activity;cation binding;endopeptidase activator activity;endopeptidase activity;endopeptidase regulator activity;enzyme activator activity;enzyme regulator activity;hydrolase activity;ion binding;metal ion binding;metallopeptidase activity;peptidase activator activity;peptidase activity;peptidase activity, acting on L-amino acid peptides;peptidase regulator activity;proteasome b…	cell part;extracellular membrane-bounded organelle;extracellular organelle;extracellular region part;extracellular vesicular exosome;intracellular membrane-bounded organelle;intracellular organelle;intracellular part;macromolecular complex;membrane-bounded organelle;membrane-bounded vesicle;nucleus;organelle;proteasome accessory complex;proteasome complex;proteasome regulatory particle, lid subco…	Proteasome	JAB;MitMem_reg	ACEVEDO_LIVER_CANCER_UP;BASSO_B_LYMPHOCYTE_NETWORK;BENPORATH_MYC_MAX_TARGETS;BENPORATH_NANOG_TARGETS;BIOCARTA_PROTEASOME_PATHWAY;BIOPOLYMER_CATABOLIC_PROCESS;BIOPOLYMER_METABOLIC_PROCESS;BLALOCK_ALZHEIMERS_DISEASE_DN;BOYAULT_LIVER_CANCER_SUBCLASS_G3_UP;BRUINS_UVC_RESPONSE_LATE;BYSTRYKH_HEMATOPOIESIS_STEM_CELL_AND_BRAIN_QTL_TRANS;CATABOLIC_PROCESS;CELLULAR_CATABOLIC_PROCESS;CELLULAR_MACROMOLECULE_…	REACT_274287;REACT_275686;REACT_275732;REACT_278878;REACT_289441;REACT_294625;REACT_297888;REACT_299120;REACT_301078;REACT_310780;REACT_315933;REACT_321346;REACT_326233;REACT_329431;REACT_334737;REACT_336463;REACT_336745;REACT_337766;REACT_341044;REACT_341075;REACT_342086;REACT_342636;REACT_343561;REACT_343568;REACT_345193;REACT_347264;REACT_351311;REACT_353777;REACT_359269;REACT_359387;REACT_360…	0.000146177	0.000169492	8	22.6359	22.3757	24.9505	23.1879	22.5843	22.3587	22.7367	22.7417	4	4	4	4	2.13165	0.0217637	2.55117
O35598	Adam10	ADA10_MOUSE	Disintegrin and metalloproteinase domain-containing protein 10	21.2008	21.4885	21.3469	21.4383	21.7296	21.681	21.4611	21.6683	21.0395	21.2754	20.9413	21.235	21.1583	21.154	20.6812	20.1481	+		+			biological regulation;cell activation;cell surface receptor linked signaling pathway;cellular macromolecule metabolic process;cellular metabolic process;cellular process;cellular protein metabolic process;cellular response to stimulus;chordate embryonic development;constitutive protein ectodomain proteolysis;developmental process;embryo development;embryo development ending in birth or egg hatchi…	binding;catalytic activity;cation binding;endopeptidase activity;enzyme binding;hydrolase activity;identical protein binding;ion binding;kinase binding;metal ion binding;metalloendopeptidase activity;metallopeptidase activity;peptidase activity;peptidase activity, acting on L-amino acid peptides;protein binding;protein dimerization activity;protein domain specific binding;protein homodimerization…	adherens junction;anchoring junction;cell junction;cell part;cell surface;cell-substrate adherens junction;cell-substrate junction;cytoplasm;cytoplasmic membrane-bounded vesicle;cytoplasmic part;cytoplasmic vesicle;cytoskeletal part;endoplasmic reticulum part;extracellular membrane-bounded organelle;extracellular organelle;extracellular region part;extracellular vesicular exosome;focal adhesion;G…	Alzheimer's disease;Epithelial cell signaling in Helicobacter pylori infection	Disintegrin;Pep_M12B_propep	ADDYA_ERYTHROID_DIFFERENTIATION_BY_HEMIN;AGTCTTA,MIR-499;AKT_UP.V1_UP;AKT_UP_MTOR_DN.V1_UP;ATATGCA,MIR-448;ATGTACA,MIR-493;ATGTTTC,MIR-494;BIOPOLYMER_METABOLIC_PROCESS;BIOPOLYMER_MODIFICATION;BOQUEST_STEM_CELL_CULTURED_VS_FRESH_UP;BUYTAERT_PHOTODYNAMIC_THERAPY_STRESS_DN;BYSTROEM_CORRELATED_WITH_IL5_DN;BYSTRYKH_HEMATOPOIESIS_STEM_CELL_QTL_TRANS;CACGTG_V$MYC_Q2;CAGCTTT,MIR-320;CAGGTG_V$E12_Q6;CELL_…	REACT_275864;REACT_279153;REACT_284350;REACT_286692;REACT_312443;REACT_313067;REACT_314615;REACT_345101	0.000146177	0.000169492	6	20.9323	21.7982	NaN	19.2178	21.3686	21.635	21.1228	20.7854	4	4	4	4	2.32149	0.00491462	1.28646
[truncated: 4,927 more rows]
[truncated: 16 more columns]

## Sheet: Fig.2 a,b
Fig.2 a,b		supplementary data			p-value cut off <0.05 (-log2 of 1.3)
					fold change < -0.25 and > 0.25
proteomics data set 1-month old cerebellum										proteomics data set 3-month old cerebellum
[truncated: 5,191 more rows]

## Sheet: Fig. 2c-e
p< 0.05	fold change >0.25
[truncated: 468 more rows]
