# Supplementary material for: Autophagy regulator ATG5 preserves cerebellar function by safeguarding its glycolytic activity
Source: Research Square preprint supplement (doi:10.21203/rs.3.rs-3921650/v1), 2024-02-08
Supplement: Supplementary file 4 [file b799503ff6b47b69911c256b.xlsx]

## Sheet: legend
	targeted amino acid metabolomics of WT and ATG5 cKO cerebellum at the age of 1 month
	Fig. 2i,j		dfferentially expressed amino acids in ATG5 cKO cerebellum at the age of 1 month

## Sheet: raw data 1 month 
	Index	Sample.Name	Sample.Type	Vial.Number	Injection.Volume	Component.Name	IS.Name	Actual.Concentration	IS.Actual.Concentration	Area	IS.Area	Area.Ratio	Retention.Time	IS.Retention.Time	Calculated.Concentration	Accuracy
12	463	S12_sample_a_mouse_cerebellum_male_WT_BEQ.998	Unknown	16	5	Ala	D4-Bz-Ala		1	9.18409e+07	6.38143e+07	1.43919	2.6024	2.58153		N/A
13	496	S13_sample_a_mouse_cerebellum_male_WT_BEQ.999	Unknown	17	5	Ala	D4-Bz-Ala		1	7.88813e+07	6.4049e+07	1.23158	2.60804	2.58736		N/A
14	760	S14_sample_a_mouse_cerebellum_female_WT_BEQ.1004	Unknown	18	5	Ala	D4-Bz-Ala		1	1.0179e+08	7.68261e+07	1.32494	2.60729	2.58592		N/A
15	529	S15_sample_a_mouse_cerebellum_female_WT_BEQ.1006	Unknown	19	5	Ala	D4-Bz-Ala		1	8.91323e+07	6.64338e+07	1.34167	2.61747	2.59615		N/A
16	562	S16_sample_a_mouse_cerebellum_female_KO_BEQ.996	Unknown	20	5	Ala	D4-Bz-Ala		1	9.16527e+07	6.42086e+07	1.42742	2.62088	2.5993		N/A
17	595	S17_sample_a_mouse_cerebellum_male_KO_BEQ.1034	Unknown	21	5	Ala	D4-Bz-Ala		1	8.62863e+07	6.64105e+07	1.29929	2.59374	2.57272		N/A
18	628	S18_sample_a_mouse_cerebellum_female_KO_BEQ.1041	Unknown	22	5	Ala	D4-Bz-Ala		1	7.47291e+07	6.73684e+07	1.10926	2.60291	2.58173		N/A
19	661	S19_sample_a_mouse_cerebellum_male_KO_BEQ.1047	Unknown	23	5	Ala	D4-Bz-Ala		1	8.55075e+07	6.26876e+07	1.36403	2.5955	2.57442		N/A
20	694	S20_sample_a_mouse_cerebellum_female_KO_BEQ.1075	Unknown	24	5	Ala	D4-Bz-Ala		1	9.82272e+07	6.47846e+07	1.51621	2.59302	2.57176		N/A
21	101	S01_sample_a_mouse_cortex_female_WT_BEQ.994	Unknown	5	5	Arg	D7-Bz-Arg		1	3.43099e+07	3.17e+07	1.08233	1.9559	1.94452		N/A
31	431	S11_sample_a_mouse_cerebellum_female_WT_BEQ.994	Unknown	15	5	Arg	D7-Bz-Arg		1	4.34967e+07	3.36807e+07	1.29144	1.9451	1.93389		N/A
32	464	S12_sample_a_mouse_cerebellum_male_WT_BEQ.998	Unknown	16	5	Arg	D7-Bz-Arg		1	4.0558e+07	3.2128e+07	1.26239	1.94014	1.92906		N/A
33	497	S13_sample_a_mouse_cerebellum_male_WT_BEQ.999	Unknown	17	5	Arg	D7-Bz-Arg		1	3.70146e+07	3.21882e+07	1.14994	1.94821	1.93732		N/A
34	761	S14_sample_a_mouse_cerebellum_female_WT_BEQ.1004	Unknown	18	5	Arg	D7-Bz-Arg		1	4.29194e+07	3.58362e+07	1.19765	1.94488	1.93375		N/A
35	530	S15_sample_a_mouse_cerebellum_female_WT_BEQ.1006	Unknown	19	5	Arg	D7-Bz-Arg		1	4.3515e+07	3.32729e+07	1.30782	1.95383	1.94302		N/A
36	563	S16_sample_a_mouse_cerebellum_female_KO_BEQ.996	Unknown	20	5	Arg	D7-Bz-Arg		1	4.65159e+07	3.19439e+07	1.45617	1.95953	1.9487		N/A
37	596	S17_sample_a_mouse_cerebellum_male_KO_BEQ.1034	Unknown	21	5	Arg	D7-Bz-Arg		1	3.68677e+07	3.18803e+07	1.15644	1.93435	1.92332		N/A
38	629	S18_sample_a_mouse_cerebellum_female_KO_BEQ.1041	Unknown	22	5	Arg	D7-Bz-Arg		1	3.70466e+07	3.29685e+07	1.1237	1.94471	1.93343		N/A
39	662	S19_sample_a_mouse_cerebellum_male_KO_BEQ.1047	Unknown	23	5	Arg	D7-Bz-Arg		1	4.53323e+07	3.1067e+07	1.45918	1.93577	1.92486		N/A
40	695	S20_sample_a_mouse_cerebellum_female_KO_BEQ.1075	Unknown	24	5	Arg	D7-Bz-Arg		1	4.83589e+07	3.06212e+07	1.57927	1.9327	1.92152		N/A
51	432	S11_sample_a_mouse_cerebellum_female_WT_BEQ.994	Unknown	15	5	Asn	13C2,15N-Bz-Gly		1	7.06958e+06	2.12407e+07	0.332831	1.95641	2.17459		N/A
52	465	S12_sample_a_mouse_cerebellum_male_WT_BEQ.998	Unknown	16	5	Asn	13C2,15N-Bz-Gly		1	6.43911e+06	2.15445e+07	0.298874	1.95188	2.1699		N/A
53	498	S13_sample_a_mouse_cerebellum_male_WT_BEQ.999	Unknown	17	5	Asn	13C2,15N-Bz-Gly		1	5.78277e+06	2.12925e+07	0.271587	1.96027	2.17776		N/A
54	762	S14_sample_a_mouse_cerebellum_female_WT_BEQ.1004	Unknown	18	5	Asn	13C2,15N-Bz-Gly		1	6.83262e+06	2.29288e+07	0.297993	1.95659	2.17458		N/A
55	531	S15_sample_a_mouse_cerebellum_female_WT_BEQ.1006	Unknown	19	5	Asn	13C2,15N-Bz-Gly		1	6.64144e+06	2.14503e+07	0.309619	1.96519	2.18304		N/A
56	564	S16_sample_a_mouse_cerebellum_female_KO_BEQ.996	Unknown	20	5	Asn	13C2,15N-Bz-Gly		1	6.74245e+06	2.04432e+07	0.329813	1.97076	2.18894		N/A
57	597	S17_sample_a_mouse_cerebellum_male_KO_BEQ.1034	Unknown	21	5	Asn	13C2,15N-Bz-Gly		1	5.80762e+06	2.08006e+07	0.279204	1.94532	2.16258		N/A
58	630	S18_sample_a_mouse_cerebellum_female_KO_BEQ.1041	Unknown	22	5	Asn	13C2,15N-Bz-Gly		1	5.61994e+06	2.01264e+07	0.279232	1.95491	2.17299		N/A
59	663	S19_sample_a_mouse_cerebellum_male_KO_BEQ.1047	Unknown	23	5	Asn	13C2,15N-Bz-Gly		1	6.55552e+06	2.03647e+07	0.321906	1.94651	2.16459		N/A
60	696	S20_sample_a_mouse_cerebellum_female_KO_BEQ.1075	Unknown	24	5	Asn	13C2,15N-Bz-Gly		1	6.50798e+06	2.032e+07	0.320275	1.94428	2.16201		N/A
61	103	S01_sample_a_mouse_cortex_female_WT_BEQ.994	Unknown	5	5	Asp	D3-Bz-Asp		1	1.83057e+07	2.59682e+06	7.04927	2.13154	2.1188		N/A
71	433	S11_sample_a_mouse_cerebellum_female_WT_BEQ.994	Unknown	15	5	Asp	D3-Bz-Asp		1	1.68666e+07	2.65934e+06	6.34242	2.12113	2.10846		N/A
72	466	S12_sample_a_mouse_cerebellum_male_WT_BEQ.998	Unknown	16	5	Asp	D3-Bz-Asp		1	1.60848e+07	2.43202e+06	6.61378	2.11665	2.10364		N/A
73	499	S13_sample_a_mouse_cerebellum_male_WT_BEQ.999	Unknown	17	5	Asp	D3-Bz-Asp		1	1.49569e+07	2.34736e+06	6.3718	2.12469	2.1117		N/A
74	763	S14_sample_a_mouse_cerebellum_female_WT_BEQ.1004	Unknown	18	5	Asp	D3-Bz-Asp		1	2.29535e+07	2.79684e+06	8.20695	2.12162	2.10846		N/A
75	532	S15_sample_a_mouse_cerebellum_female_WT_BEQ.1006	Unknown	19	5	Asp	D3-Bz-Asp		1	2.17493e+07	2.69289e+06	8.07657	2.12992	2.11683		N/A
76	565	S16_sample_a_mouse_cerebellum_female_KO_BEQ.996	Unknown	20	5	Asp	D3-Bz-Asp		1	1.82255e+07	2.57186e+06	7.08648	2.136	2.12343		N/A
77	598	S17_sample_a_mouse_cerebellum_male_KO_BEQ.1034	Unknown	21	5	Asp	D3-Bz-Asp		1	1.5133e+07	2.62679e+06	5.76102	2.10978	2.09695		N/A
78	631	S18_sample_a_mouse_cerebellum_female_KO_BEQ.1041	Unknown	22	5	Asp	D3-Bz-Asp		1	1.60444e+07	2.71412e+06	5.91147	2.1199	2.10694		N/A
79	664	S19_sample_a_mouse_cerebellum_male_KO_BEQ.1047	Unknown	23	5	Asp	D3-Bz-Asp		1	1.71079e+07	2.51582e+06	6.80011	2.11138	2.09892		N/A
80	697	S20_sample_a_mouse_cerebellum_female_KO_BEQ.1075	Unknown	24	5	Asp	D3-Bz-Asp		1	1.92208e+07	2.56603e+06	7.49049	2.10847	2.09585		N/A
91	434	S11_sample_a_mouse_cerebellum_female_WT_BEQ.994	Unknown	15	5	Cys	13C2,15N-Bz-Gly		1	261273	2.12407e+07	0.0123006	13.0885	2.17459		N/A
92	467	S12_sample_a_mouse_cerebellum_male_WT_BEQ.998	Unknown	16	5	Cys	13C2,15N-Bz-Gly		1	240244	2.15445e+07	0.0111511	13.0882	2.1699		N/A
93	500	S13_sample_a_mouse_cerebellum_male_WT_BEQ.999	Unknown	17	5	Cys	13C2,15N-Bz-Gly		1	227128	2.12925e+07	0.010667	13.0926	2.17776		N/A
94	764	S14_sample_a_mouse_cerebellum_female_WT_BEQ.1004	Unknown	18	5	Cys	13C2,15N-Bz-Gly		1	225430	2.29288e+07	0.00983174	13.0787	2.17458		N/A
95	533	S15_sample_a_mouse_cerebellum_female_WT_BEQ.1006	Unknown	19	5	Cys	13C2,15N-Bz-Gly		1	288021	2.14503e+07	0.0134274	13.0943	2.18304		N/A
96	566	S16_sample_a_mouse_cerebellum_female_KO_BEQ.996	Unknown	20	5	Cys	13C2,15N-Bz-Gly		1	303642	2.04432e+07	0.0148529	13.0944	2.18894		N/A
97	599	S17_sample_a_mouse_cerebellum_male_KO_BEQ.1034	Unknown	21	5	Cys	13C2,15N-Bz-Gly		1	285670	2.08006e+07	0.0137338	13.085	2.16258		N/A
98	632	S18_sample_a_mouse_cerebellum_female_KO_BEQ.1041	Unknown	22	5	Cys	13C2,15N-Bz-Gly		1	289073	2.01264e+07	0.0143629	13.0908	2.17299		N/A
99	665	S19_sample_a_mouse_cerebellum_male_KO_BEQ.1047	Unknown	23	5	Cys	13C2,15N-Bz-Gly		1	299072	2.03647e+07	0.0146858	13.0844	2.16459		N/A
100	698	S20_sample_a_mouse_cerebellum_female_KO_BEQ.1075	Unknown	24	5	Cys	13C2,15N-Bz-Gly		1	301352	2.032e+07	0.0148303	13.0814	2.16201		N/A
111	461	S11_sample_a_mouse_cerebellum_female_WT_BEQ.994	Unknown	15	5	GABA	D6-Bz-GABA		1	1.51813e+08	5.34344e+06	28.4111	2.78104	2.75114		N/A
112	494	S12_sample_a_mouse_cerebellum_male_WT_BEQ.998	Unknown	16	5	GABA	D6-Bz-GABA		1	1.56726e+08	5.03977e+06	31.0978	2.77734	2.74694		N/A
113	527	S13_sample_a_mouse_cerebellum_male_WT_BEQ.999	Unknown	17	5	GABA	D6-Bz-GABA		1	1.4439e+08	5.04122e+06	28.6419	2.782	2.75237		N/A
114	791	S14_sample_a_mouse_cerebellum_female_WT_BEQ.1004	Unknown	18	5	GABA	D6-Bz-GABA		1	1.65575e+08	5.16121e+06	32.0806	2.78204	2.7521		N/A
115	560	S15_sample_a_mouse_cerebellum_female_WT_BEQ.1006	Unknown	19	5	GABA	D6-Bz-GABA		1	1.49722e+08	5.31573e+06	28.1658	2.79215	2.76195		N/A
116	593	S16_sample_a_mouse_cerebellum_female_KO_BEQ.996	Unknown	20	5	GABA	D6-Bz-GABA		1	1.62445e+08	5.1523e+06	31.5287	2.79498	2.76481		N/A
117	626	S17_sample_a_mouse_cerebellum_male_KO_BEQ.1034	Unknown	21	5	GABA	D6-Bz-GABA		1	1.51482e+08	5.22552e+06	28.9889	2.76973	2.7395		N/A
118	659	S18_sample_a_mouse_cerebellum_female_KO_BEQ.1041	Unknown	22	5	GABA	D6-Bz-GABA		1	1.49355e+08	5.37762e+06	27.7734	2.77794	2.74742		N/A
119	692	S19_sample_a_mouse_cerebellum_male_KO_BEQ.1047	Unknown	23	5	GABA	D6-Bz-GABA		1	1.57095e+08	4.97105e+06	31.6019	2.76939	2.73947		N/A
120	725	S20_sample_a_mouse_cerebellum_female_KO_BEQ.1075	Unknown	24	5	GABA	D6-Bz-GABA		1	1.7442e+08	4.81084e+06	36.2557	2.76875	2.7378		N/A
131	435	S11_sample_a_mouse_cerebellum_female_WT_BEQ.994	Unknown	15	5	Gln	13C2,15N-Bz-Gly		1	3.39905e+08	2.12407e+07	16.0025	2.0131	2.17459		N/A
132	468	S12_sample_a_mouse_cerebellum_male_WT_BEQ.998	Unknown	16	5	Gln	13C2,15N-Bz-Gly		1	3.44772e+08	2.15445e+07	16.0027	2.00903	2.1699		N/A
133	501	S13_sample_a_mouse_cerebellum_male_WT_BEQ.999	Unknown	17	5	Gln	13C2,15N-Bz-Gly		1	3.35796e+08	2.12925e+07	15.7706	2.01609	2.17776		N/A
134	765	S14_sample_a_mouse_cerebellum_female_WT_BEQ.1004	Unknown	18	5	Gln	13C2,15N-Bz-Gly		1	3.64465e+08	2.29288e+07	15.8955	2.01374	2.17458		N/A
135	534	S15_sample_a_mouse_cerebellum_female_WT_BEQ.1006	Unknown	19	5	Gln	13C2,15N-Bz-Gly		1	3.60434e+08	2.14503e+07	16.8032	2.02235	2.18304		N/A
136	567	S16_sample_a_mouse_cerebellum_female_KO_BEQ.996	Unknown	20	5	Gln	13C2,15N-Bz-Gly		1	3.50787e+08	2.04432e+07	17.1591	2.02783	2.18894		N/A
137	600	S17_sample_a_mouse_cerebellum_male_KO_BEQ.1034	Unknown	21	5	Gln	13C2,15N-Bz-Gly		1	3.32768e+08	2.08006e+07	15.998	2.0018	2.16258		N/A
138	633	S18_sample_a_mouse_cerebellum_female_KO_BEQ.1041	Unknown	22	5	Gln	13C2,15N-Bz-Gly		1	3.39502e+08	2.01264e+07	16.8685	2.0124	2.17299		N/A
139	666	S19_sample_a_mouse_cerebellum_male_KO_BEQ.1047	Unknown	23	5	Gln	13C2,15N-Bz-Gly		1	3.55142e+08	2.03647e+07	17.4391	2.00344	2.16459		N/A
140	699	S20_sample_a_mouse_cerebellum_female_KO_BEQ.1075	Unknown	24	5	Gln	13C2,15N-Bz-Gly		1	3.54173e+08	2.032e+07	17.4298	2.00064	2.16201		N/A
151	436	S11_sample_a_mouse_cerebellum_female_WT_BEQ.994	Unknown	15	5	Glu	D5-Bz-Glu		1	4.0614e+08	2.57062e+07	15.7993	2.29441	2.27695		N/A
152	469	S12_sample_a_mouse_cerebellum_male_WT_BEQ.998	Unknown	16	5	Glu	D5-Bz-Glu		1	4.0476e+08	2.29577e+07	17.6307	2.28994	2.27297		N/A
153	502	S13_sample_a_mouse_cerebellum_male_WT_BEQ.999	Unknown	17	5	Glu	D5-Bz-Glu		1	3.87829e+08	2.22842e+07	17.4038	2.29737	2.28027		N/A
154	766	S14_sample_a_mouse_cerebellum_female_WT_BEQ.1004	Unknown	18	5	Glu	D5-Bz-Glu		1	4.33715e+08	2.48528e+07	17.4513	2.29515	2.27696		N/A
155	535	S15_sample_a_mouse_cerebellum_female_WT_BEQ.1006	Unknown	19	5	Glu	D5-Bz-Glu		1	4.22056e+08	2.42346e+07	17.4155	2.30393	2.28634		N/A
156	568	S16_sample_a_mouse_cerebellum_female_KO_BEQ.996	Unknown	20	5	Glu	D5-Bz-Glu		1	4.12175e+08	2.36895e+07	17.3991	2.30939	2.29154		N/A
157	601	S17_sample_a_mouse_cerebellum_male_KO_BEQ.1034	Unknown	21	5	Glu	D5-Bz-Glu		1	3.69777e+08	2.59394e+07	14.2554	2.28159	2.26449		N/A
158	634	S18_sample_a_mouse_cerebellum_female_KO_BEQ.1041	Unknown	22	5	Glu	D5-Bz-Glu		1	3.78109e+08	2.59701e+07	14.5594	2.29113	2.27482		N/A
159	667	S19_sample_a_mouse_cerebellum_male_KO_BEQ.1047	Unknown	23	5	Glu	D5-Bz-Glu		1	4.08018e+08	2.36948e+07	17.2197	2.28418	2.26646		N/A
160	700	S20_sample_a_mouse_cerebellum_female_KO_BEQ.1075	Unknown	24	5	Glu	D5-Bz-Glu		1	4.04082e+08	2.43819e+07	16.573	2.28068	2.26394		N/A
171	437	S11_sample_a_mouse_cerebellum_female_WT_BEQ.994	Unknown	15	5	Gly	13C2,15N-Bz-Gly		1	3.25596e+07	2.12407e+07	1.53289	2.18083	2.17459		N/A
172	470	S12_sample_a_mouse_cerebellum_male_WT_BEQ.998	Unknown	16	5	Gly	13C2,15N-Bz-Gly		1	2.91929e+07	2.15445e+07	1.355	2.17644	2.1699		N/A
173	503	S13_sample_a_mouse_cerebellum_male_WT_BEQ.999	Unknown	17	5	Gly	13C2,15N-Bz-Gly		1	2.81331e+07	2.12925e+07	1.32127	2.18474	2.17776		N/A
174	767	S14_sample_a_mouse_cerebellum_female_WT_BEQ.1004	Unknown	18	5	Gly	13C2,15N-Bz-Gly		1	3.73912e+07	2.29288e+07	1.63075	2.18098	2.17458		N/A
175	536	S15_sample_a_mouse_cerebellum_female_WT_BEQ.1006	Unknown	19	5	Gly	13C2,15N-Bz-Gly		1	3.29997e+07	2.14503e+07	1.53842	2.19001	2.18304		N/A
176	569	S16_sample_a_mouse_cerebellum_female_KO_BEQ.996	Unknown	20	5	Gly	13C2,15N-Bz-Gly		1	3.41886e+07	2.04432e+07	1.67237	2.19532	2.18894		N/A
177	602	S17_sample_a_mouse_cerebellum_male_KO_BEQ.1034	Unknown	21	5	Gly	13C2,15N-Bz-Gly		1	2.79791e+07	2.08006e+07	1.34511	2.16926	2.16258		N/A
178	635	S18_sample_a_mouse_cerebellum_female_KO_BEQ.1041	Unknown	22	5	Gly	13C2,15N-Bz-Gly		1	3.16819e+07	2.01264e+07	1.57414	2.17877	2.17299		N/A
179	668	S19_sample_a_mouse_cerebellum_male_KO_BEQ.1047	Unknown	23	5	Gly	13C2,15N-Bz-Gly		1	2.91291e+07	2.03647e+07	1.43037	2.17124	2.16459		N/A
180	701	S20_sample_a_mouse_cerebellum_female_KO_BEQ.1075	Unknown	24	5	Gly	13C2,15N-Bz-Gly		1	3.07397e+07	2.032e+07	1.51278	2.1684	2.16201		N/A
191	438	S11_sample_a_mouse_cerebellum_female_WT_BEQ.994	Unknown	15	5	His	D7-Bz-Arg		1	1.60282e+07	3.36807e+07	0.475886	1.83227	1.93389		N/A
192	471	S12_sample_a_mouse_cerebellum_male_WT_BEQ.998	Unknown	16	5	His	D7-Bz-Arg		1	1.59065e+07	3.2128e+07	0.495098	1.82745	1.92906		N/A
193	504	S13_sample_a_mouse_cerebellum_male_WT_BEQ.999	Unknown	17	5	His	D7-Bz-Arg		1	1.34275e+07	3.21882e+07	0.417157	1.83599	1.93732		N/A
194	768	S14_sample_a_mouse_cerebellum_female_WT_BEQ.1004	Unknown	18	5	His	D7-Bz-Arg		1	1.85072e+07	3.58362e+07	0.516438	1.83255	1.93375		N/A
195	537	S15_sample_a_mouse_cerebellum_female_WT_BEQ.1006	Unknown	19	5	His	D7-Bz-Arg		1	1.60223e+07	3.32729e+07	0.481543	1.84182	1.94302		N/A
196	570	S16_sample_a_mouse_cerebellum_female_KO_BEQ.996	Unknown	20	5	His	D7-Bz-Arg		1	1.66583e+07	3.19439e+07	0.521486	1.84728	1.9487		N/A
197	603	S17_sample_a_mouse_cerebellum_male_KO_BEQ.1034	Unknown	21	5	His	D7-Bz-Arg		1	1.89976e+07	3.18803e+07	0.595902	1.82192	1.92332		N/A
198	636	S18_sample_a_mouse_cerebellum_female_KO_BEQ.1041	Unknown	22	5	His	D7-Bz-Arg		1	1.81282e+07	3.29685e+07	0.549864	1.83097	1.93343		N/A
199	669	S19_sample_a_mouse_cerebellum_male_KO_BEQ.1047	Unknown	23	5	His	D7-Bz-Arg		1	1.73412e+07	3.1067e+07	0.558187	1.8233	1.92486		N/A
200	702	S20_sample_a_mouse_cerebellum_female_KO_BEQ.1075	Unknown	24	5	His	D7-Bz-Arg		1	1.9689e+07	3.06212e+07	0.642986	1.81955	1.92152		N/A
211	439	S11_sample_a_mouse_cerebellum_female_WT_BEQ.994	Unknown	15	5	Ile	D3-Bz-Leu		1	1.20114e+07	1.58918e+08	0.0755821	5.83905	6.11153		N/A
212	472	S12_sample_a_mouse_cerebellum_male_WT_BEQ.998	Unknown	16	5	Ile	D3-Bz-Leu		1	1.03512e+07	1.50389e+08	0.0688293	5.83984	6.11049		N/A
213	505	S13_sample_a_mouse_cerebellum_male_WT_BEQ.999	Unknown	17	5	Ile	D3-Bz-Leu		1	9.37379e+06	1.48869e+08	0.0629665	5.83879	6.1091		N/A
214	769	S14_sample_a_mouse_cerebellum_female_WT_BEQ.1004	Unknown	18	5	Ile	D3-Bz-Leu		1	1.12208e+07	1.69387e+08	0.0662436	5.83804	6.10576		N/A
215	538	S15_sample_a_mouse_cerebellum_female_WT_BEQ.1006	Unknown	19	5	Ile	D3-Bz-Leu		1	1.06995e+07	1.55746e+08	0.0686983	5.84185	6.11277		N/A
216	571	S16_sample_a_mouse_cerebellum_female_KO_BEQ.996	Unknown	20	5	Ile	D3-Bz-Leu		1	1.1583e+07	1.4891e+08	0.0777852	5.84553	6.11544		N/A
217	604	S17_sample_a_mouse_cerebellum_male_KO_BEQ.1034	Unknown	21	5	Ile	D3-Bz-Leu		1	1.30088e+07	1.52732e+08	0.0851743	5.82627	6.09777		N/A
218	637	S18_sample_a_mouse_cerebellum_female_KO_BEQ.1041	Unknown	22	5	Ile	D3-Bz-Leu		1	1.13532e+07	1.49828e+08	0.0757749	5.83487	6.10535		N/A
219	670	S19_sample_a_mouse_cerebellum_male_KO_BEQ.1047	Unknown	23	5	Ile	D3-Bz-Leu		1	1.17607e+07	1.47227e+08	0.0798816	5.83325	6.10417		N/A
220	703	S20_sample_a_mouse_cerebellum_female_KO_BEQ.1075	Unknown	24	5	Ile	D3-Bz-Leu		1	1.23816e+07	1.49655e+08	0.0827343	5.83511	6.10677		N/A
231	440	S11_sample_a_mouse_cerebellum_female_WT_BEQ.994	Unknown	15	5	Leu	D3-Bz-Leu		1	2.88217e+07	1.58918e+08	0.181362	6.14462	6.11153		N/A
232	473	S12_sample_a_mouse_cerebellum_male_WT_BEQ.998	Unknown	16	5	Leu	D3-Bz-Leu		1	2.83177e+07	1.50389e+08	0.188296	6.14428	6.11049		N/A
233	506	S13_sample_a_mouse_cerebellum_male_WT_BEQ.999	Unknown	17	5	Leu	D3-Bz-Leu		1	2.47899e+07	1.48869e+08	0.166521	6.14222	6.1091		N/A
234	770	S14_sample_a_mouse_cerebellum_female_WT_BEQ.1004	Unknown	18	5	Leu	D3-Bz-Leu		1	2.9927e+07	1.69387e+08	0.176678	6.13916	6.10576		N/A
235	539	S15_sample_a_mouse_cerebellum_female_WT_BEQ.1006	Unknown	19	5	Leu	D3-Bz-Leu		1	2.66107e+07	1.55746e+08	0.17086	6.14563	6.11277		N/A
236	572	S16_sample_a_mouse_cerebellum_female_KO_BEQ.996	Unknown	20	5	Leu	D3-Bz-Leu		1	2.80869e+07	1.4891e+08	0.188617	6.14832	6.11544		N/A
237	605	S17_sample_a_mouse_cerebellum_male_KO_BEQ.1034	Unknown	21	5	Leu	D3-Bz-Leu		1	3.23499e+07	1.52732e+08	0.211808	6.13143	6.09777		N/A
238	638	S18_sample_a_mouse_cerebellum_female_KO_BEQ.1041	Unknown	22	5	Leu	D3-Bz-Leu		1	2.83338e+07	1.49828e+08	0.189108	6.13905	6.10535		N/A
239	671	S19_sample_a_mouse_cerebellum_male_KO_BEQ.1047	Unknown	23	5	Leu	D3-Bz-Leu		1	3.21533e+07	1.47227e+08	0.218392	6.13758	6.10417		N/A
240	704	S20_sample_a_mouse_cerebellum_female_KO_BEQ.1075	Unknown	24	5	Leu	D3-Bz-Leu		1	3.67808e+07	1.49655e+08	0.245771	6.14026	6.10677		N/A
251	441	S11_sample_a_mouse_cerebellum_female_WT_BEQ.994	Unknown	15	5	Lys	D7-Bz-Arg		1	4.24054e+08	3.36807e+07	12.5904	5.69409	1.93389		N/A
252	474	S12_sample_a_mouse_cerebellum_male_WT_BEQ.998	Unknown	16	5	Lys	D7-Bz-Arg		1	3.99896e+08	3.2128e+07	12.447	5.69465	1.92906		N/A
253	507	S13_sample_a_mouse_cerebellum_male_WT_BEQ.999	Unknown	17	5	Lys	D7-Bz-Arg		1	3.95693e+08	3.21882e+07	12.2931	5.69232	1.93732		N/A
254	771	S14_sample_a_mouse_cerebellum_female_WT_BEQ.1004	Unknown	18	5	Lys	D7-Bz-Arg		1	3.91282e+08	3.58362e+07	10.9186	5.69274	1.93375		N/A
255	540	S15_sample_a_mouse_cerebellum_female_WT_BEQ.1006	Unknown	19	5	Lys	D7-Bz-Arg		1	3.8936e+08	3.32729e+07	11.702	5.69665	1.94302		N/A
256	573	S16_sample_a_mouse_cerebellum_female_KO_BEQ.996	Unknown	20	5	Lys	D7-Bz-Arg		1	4.23536e+08	3.19439e+07	13.2587	5.69837	1.9487		N/A
257	606	S17_sample_a_mouse_cerebellum_male_KO_BEQ.1034	Unknown	21	5	Lys	D7-Bz-Arg		1	3.89197e+08	3.18803e+07	12.2081	5.68048	1.92332		N/A
258	639	S18_sample_a_mouse_cerebellum_female_KO_BEQ.1041	Unknown	22	5	Lys	D7-Bz-Arg		1	3.90368e+08	3.29685e+07	11.8406	5.68956	1.93343		N/A
259	672	S19_sample_a_mouse_cerebellum_male_KO_BEQ.1047	Unknown	23	5	Lys	D7-Bz-Arg		1	4.19476e+08	3.1067e+07	13.5023	5.68793	1.92486		N/A
260	705	S20_sample_a_mouse_cerebellum_female_KO_BEQ.1075	Unknown	24	5	Lys	D7-Bz-Arg		1	3.98793e+08	3.06212e+07	13.0234	5.69008	1.92152		N/A
271	442	S11_sample_a_mouse_cerebellum_female_WT_BEQ.994	Unknown	15	5	Met	D3-Bz-Met		1	3.9838e+06	9.68091e+06	0.411511	4.39258	4.35648		N/A
272	475	S12_sample_a_mouse_cerebellum_male_WT_BEQ.998	Unknown	16	5	Met	D3-Bz-Met		1	3.79659e+06	9.38859e+06	0.404383	4.39129	4.35525		N/A
273	508	S13_sample_a_mouse_cerebellum_male_WT_BEQ.999	Unknown	17	5	Met	D3-Bz-Met		1	3.14914e+06	9.12416e+06	0.345143	4.39048	4.35442		N/A
274	772	S14_sample_a_mouse_cerebellum_female_WT_BEQ.1004	Unknown	18	5	Met	D3-Bz-Met		1	4.12725e+06	1.02987e+07	0.400753	4.39491	4.35935		N/A
275	541	S15_sample_a_mouse_cerebellum_female_WT_BEQ.1006	Unknown	19	5	Met	D3-Bz-Met		1	3.54475e+06	9.39797e+06	0.377183	4.39776	4.362		N/A
276	574	S16_sample_a_mouse_cerebellum_female_KO_BEQ.996	Unknown	20	5	Met	D3-Bz-Met		1	3.92928e+06	9.20726e+06	0.426759	4.40113	4.36529		N/A
277	607	S17_sample_a_mouse_cerebellum_male_KO_BEQ.1034	Unknown	21	5	Met	D3-Bz-Met		1	4.32634e+06	9.27576e+06	0.466414	4.38302	4.34665		N/A
278	640	S18_sample_a_mouse_cerebellum_female_KO_BEQ.1041	Unknown	22	5	Met	D3-Bz-Met		1	3.75e+06	9.33865e+06	0.401557	4.38854	4.35233		N/A
279	673	S19_sample_a_mouse_cerebellum_male_KO_BEQ.1047	Unknown	23	5	Met	D3-Bz-Met		1	4.40708e+06	9.20904e+06	0.47856	4.3853	4.34921		N/A
280	706	S20_sample_a_mouse_cerebellum_female_KO_BEQ.1075	Unknown	24	5	Met	D3-Bz-Met		1	4.76922e+06	9.46198e+06	0.50404	4.38721	4.35123		N/A
291	443	S11_sample_a_mouse_cerebellum_female_WT_BEQ.994	Unknown	15	5	Phe	D5-Bz-Phe		1	1.1118e+07	3.25026e+07	0.342065	6.42682	6.36941		N/A
292	476	S12_sample_a_mouse_cerebellum_male_WT_BEQ.998	Unknown	16	5	Phe	D5-Bz-Phe		1	1.04045e+07	3.10578e+07	0.335003	6.42565	6.3676		N/A
293	509	S13_sample_a_mouse_cerebellum_male_WT_BEQ.999	Unknown	17	5	Phe	D5-Bz-Phe		1	9.21895e+06	3.06925e+07	0.300365	6.4258	6.36745		N/A
294	773	S14_sample_a_mouse_cerebellum_female_WT_BEQ.1004	Unknown	18	5	Phe	D5-Bz-Phe		1	1.08338e+07	3.4735e+07	0.311898	6.41982	6.36161		N/A
295	542	S15_sample_a_mouse_cerebellum_female_WT_BEQ.1006	Unknown	19	5	Phe	D5-Bz-Phe		1	1.09007e+07	3.17283e+07	0.343564	6.42952	6.37083		N/A
296	575	S16_sample_a_mouse_cerebellum_female_KO_BEQ.996	Unknown	20	5	Phe	D5-Bz-Phe		1	1.21312e+07	3.11e+07	0.390072	6.43074	6.37228		N/A
297	608	S17_sample_a_mouse_cerebellum_male_KO_BEQ.1034	Unknown	21	5	Phe	D5-Bz-Phe		1	1.2118e+07	3.19275e+07	0.379548	6.41579	6.35712		N/A
298	641	S18_sample_a_mouse_cerebellum_female_KO_BEQ.1041	Unknown	22	5	Phe	D5-Bz-Phe		1	1.10726e+07	3.16894e+07	0.349409	6.42216	6.36398		N/A
299	674	S19_sample_a_mouse_cerebellum_male_KO_BEQ.1047	Unknown	23	5	Phe	D5-Bz-Phe		1	1.34311e+07	3.08826e+07	0.434906	6.42187	6.3632		N/A
300	707	S20_sample_a_mouse_cerebellum_female_KO_BEQ.1075	Unknown	24	5	Phe	D5-Bz-Phe		1	1.18221e+07	3.09743e+07	0.381674	6.42337	6.36546		N/A
311	444	S11_sample_a_mouse_cerebellum_female_WT_BEQ.994	Unknown	15	5	Pro	D7-Bz-Pro		1	8.14325e+07	1.8014e+08	0.452051	3.0925	3.05441		N/A
312	477	S12_sample_a_mouse_cerebellum_male_WT_BEQ.998	Unknown	16	5	Pro	D7-Bz-Pro		1	7.49997e+07	1.737e+08	0.431776	3.08753	3.05016		N/A
313	510	S13_sample_a_mouse_cerebellum_male_WT_BEQ.999	Unknown	17	5	Pro	D7-Bz-Pro		1	6.60454e+07	1.72162e+08	0.383624	3.09285	3.0558		N/A
314	774	S14_sample_a_mouse_cerebellum_female_WT_BEQ.1004	Unknown	18	5	Pro	D7-Bz-Pro		1	7.20384e+07	1.80768e+08	0.398513	3.09537	3.05857		N/A
315	543	S15_sample_a_mouse_cerebellum_female_WT_BEQ.1006	Unknown	19	5	Pro	D7-Bz-Pro		1	6.78654e+07	1.7887e+08	0.379411	3.10256	3.06539		N/A
316	576	S16_sample_a_mouse_cerebellum_female_KO_BEQ.996	Unknown	20	5	Pro	D7-Bz-Pro		1	8.49589e+07	1.69482e+08	0.501286	3.10571	3.06821		N/A
317	609	S17_sample_a_mouse_cerebellum_male_KO_BEQ.1034	Unknown	21	5	Pro	D7-Bz-Pro		1	7.54512e+07	1.73437e+08	0.435036	3.08409	3.04629		N/A
318	642	S18_sample_a_mouse_cerebellum_female_KO_BEQ.1041	Unknown	22	5	Pro	D7-Bz-Pro		1	7.38948e+07	1.7247e+08	0.428451	3.08952	3.05189		N/A
319	675	S19_sample_a_mouse_cerebellum_male_KO_BEQ.1047	Unknown	23	5	Pro	D7-Bz-Pro		1	8.56348e+07	1.6832e+08	0.508761	3.08132	3.04313		N/A
320	708	S20_sample_a_mouse_cerebellum_female_KO_BEQ.1075	Unknown	24	5	Pro	D7-Bz-Pro		1	8.77277e+07	1.69992e+08	0.516071	3.082	3.04415		N/A
331	445	S11_sample_a_mouse_cerebellum_female_WT_BEQ.994	Unknown	15	5	Ser	13C2,15N-Bz-Gly		1	2.71165e+07	2.12407e+07	1.27663	1.98836	2.17459		N/A
332	478	S12_sample_a_mouse_cerebellum_male_WT_BEQ.998	Unknown	16	5	Ser	13C2,15N-Bz-Gly		1	2.4727e+07	2.15445e+07	1.14772	1.98388	2.1699		N/A
333	511	S13_sample_a_mouse_cerebellum_male_WT_BEQ.999	Unknown	17	5	Ser	13C2,15N-Bz-Gly		1	2.18624e+07	2.12925e+07	1.02676	1.9921	2.17776		N/A
334	775	S14_sample_a_mouse_cerebellum_female_WT_BEQ.1004	Unknown	18	5	Ser	13C2,15N-Bz-Gly		1	2.85015e+07	2.29288e+07	1.24304	1.98833	2.17458		N/A
335	544	S15_sample_a_mouse_cerebellum_female_WT_BEQ.1006	Unknown	19	5	Ser	13C2,15N-Bz-Gly		1	3.0461e+07	2.14503e+07	1.42007	1.99714	2.18304		N/A
336	577	S16_sample_a_mouse_cerebellum_female_KO_BEQ.996	Unknown	20	5	Ser	13C2,15N-Bz-Gly		1	2.9169e+07	2.04432e+07	1.42683	2.00319	2.18894		N/A
337	610	S17_sample_a_mouse_cerebellum_male_KO_BEQ.1034	Unknown	21	5	Ser	13C2,15N-Bz-Gly		1	3.47873e+07	2.08006e+07	1.67242	1.9781	2.16258		N/A
338	643	S18_sample_a_mouse_cerebellum_female_KO_BEQ.1041	Unknown	22	5	Ser	13C2,15N-Bz-Gly		1	4.48877e+07	2.01264e+07	2.23029	1.98807	2.17299		N/A
339	676	S19_sample_a_mouse_cerebellum_male_KO_BEQ.1047	Unknown	23	5	Ser	13C2,15N-Bz-Gly		1	2.6349e+07	2.03647e+07	1.29386	1.97906	2.16459		N/A
340	709	S20_sample_a_mouse_cerebellum_female_KO_BEQ.1075	Unknown	24	5	Ser	13C2,15N-Bz-Gly		1	2.97139e+07	2.032e+07	1.4623	1.97608	2.16201		N/A
351	446	S11_sample_a_mouse_cerebellum_female_WT_BEQ.994	Unknown	15	5	Thr	13C2,15N-Bz-Gly		1	2.51545e+06	2.12407e+07	0.118426	6.42624	2.17459		N/A
352	479	S12_sample_a_mouse_cerebellum_male_WT_BEQ.998	Unknown	16	5	Thr	13C2,15N-Bz-Gly		1	2.46066e+06	2.15445e+07	0.114213	6.42503	2.1699		N/A
353	512	S13_sample_a_mouse_cerebellum_male_WT_BEQ.999	Unknown	17	5	Thr	13C2,15N-Bz-Gly		1	2.13668e+06	2.12925e+07	0.100349	6.42476	2.17776		N/A
354	776	S14_sample_a_mouse_cerebellum_female_WT_BEQ.1004	Unknown	18	5	Thr	13C2,15N-Bz-Gly		1	2.37961e+06	2.29288e+07	0.103783	6.41847	2.17458		N/A
355	545	S15_sample_a_mouse_cerebellum_female_WT_BEQ.1006	Unknown	19	5	Thr	13C2,15N-Bz-Gly		1	2.5481e+06	2.14503e+07	0.118791	6.42839	2.18304		N/A
356	578	S16_sample_a_mouse_cerebellum_female_KO_BEQ.996	Unknown	20	5	Thr	13C2,15N-Bz-Gly		1	2.66036e+06	2.04432e+07	0.130134	6.42959	2.18894		N/A
357	611	S17_sample_a_mouse_cerebellum_male_KO_BEQ.1034	Unknown	21	5	Thr	13C2,15N-Bz-Gly		1	2.7487e+06	2.08006e+07	0.132145	6.41445	2.16258		N/A
358	644	S18_sample_a_mouse_cerebellum_female_KO_BEQ.1041	Unknown	22	5	Thr	13C2,15N-Bz-Gly		1	2.58425e+06	2.01264e+07	0.128401	6.42125	2.17299		N/A
359	677	S19_sample_a_mouse_cerebellum_male_KO_BEQ.1047	Unknown	23	5	Thr	13C2,15N-Bz-Gly		1	3.08165e+06	2.03647e+07	0.151323	6.42106	2.16459		N/A
360	710	S20_sample_a_mouse_cerebellum_female_KO_BEQ.1075	Unknown	24	5	Thr	13C2,15N-Bz-Gly		1	2.69409e+06	2.032e+07	0.132583	6.4228	2.16201		N/A
371	447	S11_sample_a_mouse_cerebellum_female_WT_BEQ.994	Unknown	15	5	Trp	D5-Bz-Phe		1	5.04828e+06	3.25026e+07	0.155319	6.6633	6.36941		N/A
372	480	S12_sample_a_mouse_cerebellum_male_WT_BEQ.998	Unknown	16	5	Trp	D5-Bz-Phe		1	3.35024e+06	3.10578e+07	0.107871	6.66251	6.3676		N/A
373	513	S13_sample_a_mouse_cerebellum_male_WT_BEQ.999	Unknown	17	5	Trp	D5-Bz-Phe		1	3.26566e+06	3.06925e+07	0.106399	6.66348	6.36745		N/A
374	777	S14_sample_a_mouse_cerebellum_female_WT_BEQ.1004	Unknown	18	5	Trp	D5-Bz-Phe		1	4.36048e+06	3.4735e+07	0.125536	6.65506	6.36161		N/A
375	546	S15_sample_a_mouse_cerebellum_female_WT_BEQ.1006	Unknown	19	5	Trp	D5-Bz-Phe		1	4.57444e+06	3.17283e+07	0.144175	6.66682	6.37083		N/A
376	579	S16_sample_a_mouse_cerebellum_female_KO_BEQ.996	Unknown	20	5	Trp	D5-Bz-Phe		1	6.06172e+06	3.11e+07	0.194911	6.66714	6.37228		N/A
377	612	S17_sample_a_mouse_cerebellum_male_KO_BEQ.1034	Unknown	21	5	Trp	D5-Bz-Phe		1	5.18848e+06	3.19275e+07	0.162508	6.65409	6.35712		N/A
378	645	S18_sample_a_mouse_cerebellum_female_KO_BEQ.1041	Unknown	22	5	Trp	D5-Bz-Phe		1	4.62283e+06	3.16894e+07	0.145879	6.66103	6.36398		N/A
379	678	S19_sample_a_mouse_cerebellum_male_KO_BEQ.1047	Unknown	23	5	Trp	D5-Bz-Phe		1	4.64387e+06	3.08826e+07	0.150372	6.661	6.3632		N/A
380	711	S20_sample_a_mouse_cerebellum_female_KO_BEQ.1075	Unknown	24	5	Trp	D5-Bz-Phe		1	4.17845e+06	3.09743e+07	0.134901	6.65983	6.36546		N/A
391	448	S11_sample_a_mouse_cerebellum_female_WT_BEQ.994	Unknown	15	5	Tyr	D4-Bz-Tyr		1	1.38373e+08	3.32519e+08	0.416135	10.7778	10.7485		N/A
392	481	S12_sample_a_mouse_cerebellum_male_WT_BEQ.998	Unknown	16	5	Tyr	D4-Bz-Tyr		1	8.54057e+07	3.30683e+08	0.258271	10.7781	10.7491		N/A
393	514	S13_sample_a_mouse_cerebellum_male_WT_BEQ.999	Unknown	17	5	Tyr	D4-Bz-Tyr		1	7.5351e+07	2.9191e+08	0.258131	10.7797	10.7503		N/A
394	778	S14_sample_a_mouse_cerebellum_female_WT_BEQ.1004	Unknown	18	5	Tyr	D4-Bz-Tyr		1	1.01775e+08	3.49145e+08	0.291498	10.768	10.7385		N/A
395	547	S15_sample_a_mouse_cerebellum_female_WT_BEQ.1006	Unknown	19	5	Tyr	D4-Bz-Tyr		1	9.51503e+07	3.37759e+08	0.281711	10.7854	10.7563		N/A
396	580	S16_sample_a_mouse_cerebellum_female_KO_BEQ.996	Unknown	20	5	Tyr	D4-Bz-Tyr		1	1.47656e+08	3.10951e+08	0.474854	10.7832	10.7534		N/A
397	613	S17_sample_a_mouse_cerebellum_male_KO_BEQ.1034	Unknown	21	5	Tyr	D4-Bz-Tyr		1	1.16529e+08	3.23235e+08	0.360509	10.7747	10.746		N/A
398	646	S18_sample_a_mouse_cerebellum_female_KO_BEQ.1041	Unknown	22	5	Tyr	D4-Bz-Tyr		1	8.96541e+07	3.3484e+08	0.267752	10.7821	10.7527		N/A
399	679	S19_sample_a_mouse_cerebellum_male_KO_BEQ.1047	Unknown	23	5	Tyr	D4-Bz-Tyr		1	1.28695e+08	3.00728e+08	0.427947	10.7747	10.746		N/A
400	712	S20_sample_a_mouse_cerebellum_female_KO_BEQ.1075	Unknown	24	5	Tyr	D4-Bz-Tyr		1	1.45872e+08	3.19844e+08	0.456072	10.7757	10.7466		N/A
401	119	S01_sample_a_mouse_cortex_female_WT_BEQ.994	Unknown	5	5	Val	D8-Bz-Val		1	2.81698e+07	1.00555e+08	0.280144	4.35262	4.29783		N/A
411	449	S11_sample_a_mouse_cerebellum_female_WT_BEQ.994	Unknown	15	5	Val	D8-Bz-Val		1	2.66962e+07	1.08486e+08	0.24608	4.34836	4.29332		N/A
412	482	S12_sample_a_mouse_cerebellum_male_WT_BEQ.998	Unknown	16	5	Val	D8-Bz-Val		1	2.32183e+07	1.03013e+08	0.225391	4.34517	4.29214		N/A
413	515	S13_sample_a_mouse_cerebellum_male_WT_BEQ.999	Unknown	17	5	Val	D8-Bz-Val		1	2.10627e+07	1.02323e+08	0.205846	4.34293	4.29146		N/A
414	779	S14_sample_a_mouse_cerebellum_female_WT_BEQ.1004	Unknown	18	5	Val	D8-Bz-Val		1	2.84146e+07	1.22317e+08	0.232303	4.35065	4.29727		N/A
415	548	S15_sample_a_mouse_cerebellum_female_WT_BEQ.1006	Unknown	19	5	Val	D8-Bz-Val		1	2.48877e+07	1.07023e+08	0.232545	4.35237	4.2981		N/A
416	581	S16_sample_a_mouse_cerebellum_female_KO_BEQ.996	Unknown	20	5	Val	D8-Bz-Val		1	2.81565e+07	1.02184e+08	0.275547	4.35435	4.30291		N/A
417	614	S17_sample_a_mouse_cerebellum_male_KO_BEQ.1034	Unknown	21	5	Val	D8-Bz-Val		1	2.31207e+07	1.06393e+08	0.217314	4.33676	4.28357		N/A
418	647	S18_sample_a_mouse_cerebellum_female_KO_BEQ.1041	Unknown	22	5	Val	D8-Bz-Val		1	2.3929e+07	1.05407e+08	0.227016	4.34245	4.28869		N/A
419	680	S19_sample_a_mouse_cerebellum_male_KO_BEQ.1047	Unknown	23	5	Val	D8-Bz-Val		1	2.73267e+07	1.0118e+08	0.270079	4.33996	4.2855		N/A
420	713	S20_sample_a_mouse_cerebellum_female_KO_BEQ.1075	Unknown	24	5	Val	D8-Bz-Val		1	2.71976e+07	1.0356e+08	0.262628	4.3398	4.28713		N/A

## Sheet: summary data 1 month
Fig. 2i,j
Cerebellum
		WT	WT	WT	WT	WT	ATG5 cKO	ATG5 cKO	ATG5 cKO	ATG5 cKO	ATG5 cKO
Alanine	Ala	1.41295	1.43919	1.23158	1.32494	1.34167	1.42742	1.29929	1.10926	1.36403	1.51621		0.932158
Arginine	Arg	1.29144	1.26239	1.14994	1.19765	1.30782	1.45617	1.15644	1.1237	1.45918	1.57927		0.269721
Asparagine	Asn	0.332831	0.298874	0.271587	0.297993	0.309619	0.329813	0.279204	0.279232	0.321906	0.320275		0.799384
Aspartic acid	Asp	6.34242	6.61378	6.3718	8.20695	8.07657	7.08648	5.76102	5.91147	6.80011	7.49049		0.367812
Cystein	Cys	0.0123006	0.0111511	0.010667	0.00983174	0.0134274	0.0148529	0.0137338	0.0143629	0.0146858	0.0148303		0.00189254
Glutamine	Gln	16.0025	16.0027	15.7706	15.8955	16.8032	17.1591	15.998	16.8685	17.4391	17.4298		0.0255476
Glutamic acid	Glu	15.7993	17.6307	17.4038	17.4513	17.4155	17.3991	14.2554	14.5594	17.2197	16.573		0.166108
Glycine	Gly	1.53289	1.355	1.32127	1.63075	1.53842	1.67237	1.34511	1.57414	1.43037	1.51278		0.711857
Histidine	His	0.475886	0.495098	0.417157	0.516438	0.481543	0.521486	0.595902	0.549864	0.558187	0.642986		0.0069256
Isoleucine	Ile	0.0755821	0.0688293	0.0629665	0.0662436	0.0686983	0.0777852	0.0851743	0.0757749	0.0798816	0.0827343		0.00222525
Leucine	Leu	0.181362	0.188296	0.166521	0.176678	0.17086	0.188617	0.211808	0.189108	0.218392	0.245771		0.016615
Lysine	Lys	12.5904	12.447	12.2931	10.9186	11.702	13.2587	12.2081	11.8406	13.5023	13.0234		0.117197
Methionine	Met	0.411511	0.404383	0.345143	0.400753	0.377183	0.426759	0.466414	0.401557	0.47856	0.50404		0.0152107
Phenylalanine	Phe	0.342065	0.335003	0.300365	0.311898	0.343564	0.390072	0.379548	0.349409	0.434906	0.381674		0.00588853
Proline	Pro	0.452051	0.431776	0.383624	0.398513	0.379411	0.501286	0.435036	0.428451	0.508761	0.516071		0.0197691
Serine	Ser	1.27663	1.14772	1.02676	1.24304	1.42007	1.42683	1.67242	2.23029	1.29386	1.4623		0.0570408
Threonine	Thr	0.118426	0.114213	0.100349	0.103783	0.118791	0.130134	0.132145	0.128401	0.151323	0.132583		0.00295325
Tryptophan	Trp	0.155319	0.107871	0.106399	0.125536	0.144175	0.194911	0.162508	0.145879	0.150372	0.134901		0.0679563
Tyrosine	Tyr	0.416135	0.258271	0.258131	0.291498	0.281711	0.474854	0.360509	0.267752	0.427947	0.456072		0.0793831
Valine	Val	0.24608	0.225391	0.205846	0.232303	0.232545	0.275547	0.217314	0.227016	0.270079	0.262628		0.141856

## Sheet: 1 month statistics
1 month old AA analysis
multiple t-test with linear Benjamini, Krieger and Yekutieli
				ATG5 cKO			WT				-log10 (q-value)
	significant?	p value		mean	SEM		mean	SEM		difference	mean
Ala	No	0.943328		99.466	4.3052		100	0		-0.53398	0.350936
Arg	No	0.235297		108.934	6.11078		100	0		8.93448	0.766896
Asn	No	0.856483		101.359	2.43996		100	0		1.35854	0.370603
Asp	No	0.383258		93.4429	4.93761		100	0		-6.5571	0.624738
Cys	Yes	0.000307		127.676	6.64993		100	0		27.6756	3.01489
Gln	No	0.462806		105.52	1.68166		100	0		5.51982	0.589618
Glu	No	0.401745		93.6946	5.30334		100	0		-6.30536	0.624738
Gly	No	0.718247		102.711	5.3228		100	0		2.7107	0.423567
His	Yes	0.006521		120.673	5.34264		100	0		20.6729	1.98838
Ile	Yes	0.020131		117.605	3.72758		100	0		17.6045	1.73197
Leu	Yes	0.010188		119.501	6.83432		100	0		19.5012	1.86159
Lys	No	0.356679		106.933	4.96261		100	0		6.93262	0.624738
Met	Yes	0.019561		117.688	4.79613		100	0		17.6875	1.73197
Phe	Yes	0.013001		118.838	5.21753		100	0		18.8382	1.81367
Pro	Yes	0.021577		117.403	6.34076		100	0		17.403	1.73197
Ser	Yes	3e-06		136.352	21.6636		100	0		36.3518	4.55591
Thr	Yes	0.003555		122.192	6.69489		100	0		22.192	2.17273
Trp	Yes	0.000923		125.319	9.53794		100	0		25.3194	2.6614
Tyr	Yes	1.7e-05		133.225	10.6827		100	0		33.2254	4.08538
Val	No	0.203575		109.575	3.43087		100	0		9.57454	0.795026
